# Supplementary material for: CRISPR-Cas9 genetic screen leads to the discovery of L-Moses, a KAT2B inhibitor that attenuates Tunicamycin-mediated neuronal cell death
Source: Sci Rep. 2023 Mar 9;13:3934. doi: 10.1038/s41598-023-31141-6 (PMC9998435; doi:10.1038/s41598-023-31141-6)
Supplement: Supplementary file 3 — Supplementary Information 3. [file 41598_2023_31141_MOESM3_ESM.xlsx]

## Sheet: Supplementary Table 2
Supplementary Table 2: pooled screen data
a) Gene summary report generated by MAGeCK. Significant hits are highlighted.
b) sgRNA summary report generated by MAGeCK.

## Sheet: CAS9-TUN_vs_UNT.gene_summary
id	num	neg|score	neg|p-value	neg|fdr	neg|rank	neg|goodsgrna	neg|lfc	pos|score	pos|p-value	pos|fdr	pos|rank	pos|goodsgrna	pos|lfc
CAMKV	5	0.13271	0.28331	1	1218	1	0.22191	9.24e-05	0.00055067	1	2	3	0.22191
MRGPRF	6	0.99994	0.99992	1	4391	0	0.26985	6.16e-05	0.00060031	1	1	6	0.26985
MCHR1	6	0.042585	0.13536	1	499	1	-0.016462	0.00011597	0.00092942	1	3	2	-0.016462
CNGA1	6	0.81569	0.82361	1	3610	1	0.033973	0.00012217	0.00097539	1	4	3	0.033973
CFTR	6	0.93866	0.94093	1	4130	0	0.37257	0.00014962	0.0011427	1	5	4	0.37257
MELTF	6	0.4249	0.56063	1	2540	2	0.073117	0.0002657	0.0016961	1	6	3	0.073117		significant hits
CHST2	6	0.99966	0.9996	1	4390	0	0.2419	0.00033509	0.002393	1	8	6	0.2419
MGAM	6	0.29597	0.46348	1	2038	2	0.036149	0.00033265	0.002393	1	7	2	0.036149
KCNK1	6	0.80069	0.79869	1	3548	1	0.23892	0.00034849	0.0025143	1	9	3	0.23892
FAM3B	6	0.99961	0.99948	1	4389	0	0.26025	0.00038789	0.0029482	1	10	6	0.26025
TUBA4A	6	0.41639	0.55255	1	2509	2	0.052024	0.00055436	0.0039687	1	11	3	0.052024
SLC5A9	5	0.94242	0.94106	1	4144	0	0.3199	0.00070639	0.004079	1	14	3	0.3199
TLR1	6	0.94962	0.95236	1	4175	0	0.29083	0.00060391	0.0042353	1	12	4	0.29083
CA2	6	0.090314	0.22067	1	916	3	0.049333	0.00063196	0.0042757	1	13	3	0.049333
TGFB3	6	0.92554	0.92576	1	4078	0	0.24151	0.00077603	0.0047611	1	15	3	0.24151
TRAV8-4	5	0.12759	0.27514	1	1183	2	-0.10375	0.00088211	0.0050608	1	16	2	-0.10375
SERPINE2	6	0.19322	0.37479	1	1623	3	-0.043426	0.00099766	0.0058422	1	17	2	-0.043426
NEK9	6	0.75763	0.77704	1	3414	1	0.30146	0.0010989	0.0060886	1	18	4	0.30146
CD8A	6	0.98388	0.98218	1	4316	0	0.23837	0.0011425	0.0068002	1	19	4	0.23837
MUC5B	6	0.87691	0.88467	1	3851	0	0.17111	0.0011437	0.0068002	1	20	5	0.17111
GPR1	6	0.99678	0.99675	1	4376	0	0.26398	0.0011729	0.0068424	1	21	5	0.26398
PTPN7	6	0.24983	0.43092	1	1869	2	-0.0036169	0.0012193	0.0073462	1	22	1	-0.0036169
NEK3	6	0.73946	0.77352	1	3359	1	0.16375	0.0012402	0.0073848	1	23	3	0.16375
TLR2	6	0.79415	0.79532	1	3529	1	0.24014	0.0012922	0.0076551	1	24	5	0.24014
SV2C	6	0.22273	0.40234	1	1780	1	0.17125	0.0013454	0.0079658	1	25	3	0.17125
P3H1	6	0.040326	0.13347	1	475	2	-0.23191	0.0014408	0.0085266	1	26	2	-0.23191
BSPH1	6	0.2393	0.41882	1	1832	1	0.14109	0.0016623	0.010005	1	27	3	0.14109
SLC13A3	6	0.18401	0.36539	1	1553	2	0.22698	0.0017037	0.010075	1	28	4	0.22698
FCN2	6	0.14759	0.29306	1	1323	2	0.053422	0.0017616	0.010163	1	29	2	0.053422
DMPK	6	0.80826	0.81235	1	3580	1	0.25168	0.0017982	0.010216	1	30	5	0.25168
SRPK2	6	0.64992	0.73937	1	3150	1	0.27599	0.0018409	0.010297	1	31	4	0.27599
TYK2	6	0.7721	0.78505	1	3459	1	0.045923	0.0018838	0.010735	1	32	3	0.045923
CRELD2	6	0.60342	0.71662	1	3047	1	0.29453	0.0019859	0.011148	1	33	4	0.29453
PRRT3	6	0.55619	0.69836	1	2954	1	0.12786	0.0021052	0.012184	1	34	2	0.12786
BIRC8	6	0.59	0.71081	1	3019	1	0.15775	0.002206	0.012417	1	35	5	0.15775
GUCY1A2	6	0.4559	0.60602	1	2659	1	0.14741	0.0023266	0.013158	1	37	3	0.14741
SMPDL3B	6	0.48233	0.63767	1	2746	2	0.068294	0.0023244	0.013158	1	36	2	0.068294
CXCL9	6	0.48764	0.64261	1	2767	2	0.18809	0.0024051	0.01343	1	38	4	0.18809
CRTAC1	6	0.98504	0.98366	1	4323	0	0.23908	0.0024493	0.013642	1	39	5	0.23908
FCGRT	6	0.85354	0.86564	1	3763	1	0.16561	0.0025479	0.013943	1	40	2	0.16561
TRAC	5	0.51205	0.62472	1	2860	1	0.27215	0.0030558	0.014526	1	48	3	0.27215
RIOK2	6	0.72093	0.76459	1	3320	1	0.1668	0.0027125	0.015583	1	41	3	0.1668
CLCA1	6	0.94299	0.9437	1	4146	0	0.062893	0.0027692	0.015831	1	42	2	0.062893
MARS	6	0.84123	0.85201	1	3707	1	0.2054	0.0029067	0.016701	1	44	5	0.2054
GPR45	6	0.32839	0.48677	1	2168	2	0.14427	0.0029024	0.016701	1	43	3	0.14427
AREG	6	0.34023	0.49373	1	2210	1	0.13912	0.0029656	0.016852	1	45	3	0.13912
PHKG2	6	0.75123	0.77704	1	3392	1	0.13748	0.0029905	0.016903	1	46	3	0.13748
CST2	6	0.73207	0.77015	1	3343	1	0.26379	0.0030381	0.017185	1	47	4	0.26379
KSR2	6	0.85796	0.86564	1	3779	0	0.18039	0.0030679	0.017187	1	49	3	0.18039
PSMA5	6	0.98144	0.97936	1	4304	0	0.19357	0.0032026	0.017975	1	50	5	0.19357
FAM20A	6	0.02765	0.087374	1	346	3	0.075036	0.0032112	0.017975	1	51	3	0.075036
GPR52	6	0.9251	0.92576	1	4074	0	0.015078	0.0032117	0.017975	1	52	1	0.015078
LTB4R	6	0.79836	0.79755	1	3542	1	0.23276	0.0036097	0.018814	1	53	4	0.23276
CYP51A1	6	0.17385	0.34693	1	1485	1	0.22146	0.0036816	0.018884	1	54	5	0.22146
EPHX2	6	0.61946	0.72559	1	3082	1	0.023925	0.0037646	0.01929	1	55	1	0.023925
HIST1H4D	6	0.051743	0.15515	1	614	4	-0.1744	0.0037646	0.01929	1	56	1	-0.1744
NMUR2	6	0.99938	0.99929	1	4387	0	0.19033	0.0038586	0.019547	1	57	5	0.19033
ADA2	6	0.74959	0.77586	1	3386	1	0.17899	0.0038835	0.019549	1	58	4	0.17899
NMT1	6	0.91326	0.91646	1	4021	0	0.18449	0.0038982	0.019626	1	59	5	0.18449
HSD17B10	6	0.14225	0.28167	1	1285	2	0.2415	0.0040137	0.019628	1	60	4	0.2415
CAMK2A	6	0.90396	0.90917	1	3973	0	0.19618	0.0040715	0.020275	1	61	5	0.19618
TNFRSF14	6	0.99554	0.9953	1	4366	0	0.16158	0.0040962	0.020454	1	62	4	0.16158
DHRS9	5	0.86127	0.86655	1	3795	0	0.0085179	0.0046817	0.020461	1	66	2	0.0085179
LIFR	5	0.23026	0.36144	1	1808	1	0.14888	0.0047093	0.020549	1	67	4	0.14888
P2RX6	6	0.17044	0.33898	1	1461	1	0.24465	0.004531	0.02243	1	63	4	0.24465
NID2	6	0.30856	0.47283	1	2096	2	0.20807	0.0045495	0.02243	1	65	3	0.20807
SERPINI2	6	0.17364	0.34693	1	1484	3	-0.085763	0.0045382	0.02243	1	64	1	-0.085763
PTP4A2	6	0.99314	0.99277	1	4358	0	0.21606	0.0047353	0.023136	1	69	5	0.21606
EEF2K	6	0.91051	0.91572	1	4011	0	0.17212	0.0047254	0.023136	1	68	5	0.17212
AMPD1	6	0.61358	0.72013	1	3074	1	0.22802	0.0047491	0.023221	1	70	4	0.22802
ALDH7A1	6	0.41968	0.55365	1	2518	1	0.049699	0.0047591	0.023809	1	71	3	0.049699
ROR1	6	0.038299	0.12284	1	455	2	0.23458	0.0048236	0.023997	1	72	4	0.23458
GPR139	6	0.99147	0.99017	1	4353	0	0.13628	0.0048625	0.024092	1	73	3	0.13628
SLC29A2	6	0.63763	0.73014	1	3120	1	0.06807	0.0050905	0.024734	1	75	3	0.06807
IGHD	6	0.82466	0.8383	1	3639	1	0.048884	0.0050905	0.024734	1	74	2	0.048884
CD300LB	6	0.78257	0.78966	1	3492	1	0.29187	0.0051401	0.024903	1	76	4	0.29187
PIK3CB	6	0.14136	0.28166	1	1277	1	0.15509	0.0053011	0.025707	1	77	5	0.15509
SCRG1	6	0.21406	0.39669	1	1743	1	0.20693	0.0053527	0.025709	1	78	5	0.20693
KCNA6	6	0.69707	0.75554	1	3273	1	0.18041	0.0053845	0.025793	1	79	5	0.18041
OR51E2	6	0.091968	0.22127	1	927	1	0.15344	0.0054059	0.025795	1	80	4	0.15344
CALCA	6	0.39225	0.52975	1	2410	2	0.05871	0.0054217	0.026301	1	81	3	0.05871
FGF7	6	0.95396	0.9552	1	4192	0	0.1547	0.005432	0.026302	1	82	5	0.1547
HIST1H1C	6	0.4421	0.58404	1	2612	2	-0.050097	0.0054534	0.026389	1	83	2	-0.050097
ENPP5	6	0.5226	0.68011	1	2904	1	0.078307	0.0055743	0.027395	1	84	3	0.078307
SIGLEC11	6	0.59764	0.71662	1	3035	1	0.25561	0.0056019	0.027468	1	85	4	0.25561
PAPPA2	6	0.88471	0.89347	1	3882	0	0.040342	0.0056425	0.02747	1	86	2	0.040342
PZP	6	0.50411	0.65907	1	2832	1	0.076477	0.0058407	0.028119	1	87	3	0.076477
DHODH	6	0.47014	0.62728	1	2707	2	-0.053197	0.0058632	0.028205	1	88	1	-0.053197
NPVF	6	0.75572	0.77704	1	3412	1	0.10956	0.0060286	0.028314	1	89	3	0.10956
GSTP1	6	0.7207	0.76459	1	3319	1	0.19867	0.0060694	0.028411	1	90	4	0.19867
PRR4	6	0.78169	0.78966	1	3489	1	0.071076	0.0060839	0.028411	1	91	3	0.071076
C8B	6	0.39397	0.52975	1	2421	2	0.070321	0.0061766	0.028625	1	92	3	0.070321
OR51C1P	5	0.923	0.92446	1	4062	0	0.012914	0.0075063	0.028963	1	111	2	0.012914
NRP1	6	0.9752	0.97387	1	4280	0	0.18063	0.0062764	0.029035	1	93	4	0.18063
SST	6	0.033086	0.10646	1	401	2	-0.071658	0.0063045	0.029246	1	94	2	-0.071658
TEK	6	0.63371	0.72898	1	3113	1	0.21958	0.0063493	0.029334	1	97	3	0.21958
ANGPTL3	6	0.71098	0.7611	1	3304	1	0.20411	0.00634	0.029334	1	96	3	0.20411
TAOK1	6	0.99647	0.99637	1	4371	0	0.10394	0.0063263	0.029334	1	95	3	0.10394
DLL4	6	0.46082	0.61479	1	2677	1	0.22829	0.0063617	0.029336	1	99	4	0.22829
CHRNA2	6	0.84999	0.86224	1	3748	1	0.1739	0.0063585	0.029336	1	98	3	0.1739
OR4D9	5	0.35732	0.4911	1	2271	2	0.2221	0.0080948	0.030107	1	117	3	0.2221
VSTM1	6	0.57119	0.70399	1	2985	1	0.14456	0.0065251	0.030303	1	100	3	0.14456
IL32	6	0.65425	0.74056	1	3162	1	0.17451	0.0066935	0.032298	1	101	4	0.17451
KMT2A	6	0.85598	0.86564	1	3773	0	0.11127	0.0067457	0.032644	1	102	3	0.11127
BMP7	6	0.97347	0.97249	1	4269	0	0.20974	0.006956	0.033392	1	103	4	0.20974
ABCC4	6	0.96515	0.96472	1	4242	0	0.18943	0.0069645	0.033392	1	104	3	0.18943
FSTL4	6	0.74823	0.77474	1	3383	1	0.141	0.0069658	0.033392	1	105	3	0.141
PRKG1	6	0.37174	0.5127	1	2322	1	0.1592	0.0071131	0.033394	1	108	3	0.1592
BRSK2	6	0.38538	0.52691	1	2381	2	-0.028725	0.0070765	0.033394	1	107	1	-0.028725
CNTNAP3	6	0.26401	0.43617	1	1929	2	-0.16694	0.0070765	0.033394	1	106	1	-0.16694
YWHAG	6	0.88235	0.89163	1	3877	0	0.26959	0.0072124	0.033493	1	109	4	0.26959
ADORA3	6	0.10073	0.23163	1	991	1	0.18049	0.0072154	0.033493	1	110	5	0.18049
MLNR	6	0.96403	0.96399	1	4237	0	0.17112	0.0075929	0.035707	1	114	5	0.17112
SLC22A13	6	0.28424	0.44982	1	2005	1	0.11487	0.0075174	0.035707	1	112	3	0.11487
GDF5	6	0.96795	0.96727	1	4253	0	0.09364	0.0075174	0.035707	1	113	3	0.09364
MRGPRE	6	0.7071	0.7611	1	3297	1	0.13537	0.0077994	0.035709	1	115	5	0.13537
CA3	6	0.052419	0.15622	1	622	4	-0.11792	0.0078479	0.035709	1	116	2	-0.11792
CD3E	6	0.29723	0.46348	1	2045	2	0.1082	0.0082885	0.037634	1	120	2	0.1082
GIPR	6	0.38309	0.52233	1	2374	2	0.10757	0.0082885	0.037634	1	119	3	0.10757
BCL2L1	6	0.15717	0.31558	1	1382	2	0.090078	0.0082885	0.037634	1	121	3	0.090078
CAMK1D	6	0.19716	0.37861	1	1648	2	0.066257	0.0082534	0.037634	1	118	2	0.066257
CYP11A1	6	0.7018	0.75669	1	3285	1	0.25923	0.0083292	0.037733	1	122	3	0.25923
CYP4F22	6	0.49212	0.64785	1	2788	1	0.20711	0.0084058	0.038233	1	124	4	0.20711
HPSE	6	0.9949	0.995	1	4363	0	0.17832	0.0084049	0.038233	1	123	4	0.17832
YBX1	5	0.98317	0.98161	1	4315	0	0.21111	0.01138	0.038266	1	162	4	0.21111
CACNA1I	6	0.58256	0.70851	1	3005	1	0.19784	0.0085602	0.03916	1	125	3	0.19784
LALBA	6	0.32247	0.47986	1	2146	1	0.22694	0.008651	0.039969	1	126	4	0.22694
S100A12	6	0.96826	0.96762	1	4254	0	0.11358	0.0086604	0.039971	1	127	3	0.11358
OR2V2	6	0.31415	0.47664	1	2116	2	-0.031527	0.008729	0.040342	1	128	2	-0.031527
DNASE1L3	6	0.64751	0.73937	1	3140	1	0.033268	0.0087838	0.040344	1	129	3	0.033268
OSTN	6	0.08992	0.21925	1	913	2	0.15506	0.0088226	0.040475	1	130	4	0.15506
PSMB3	6	0.44905	0.59214	1	2633	1	-0.065527	0.0089491	0.042135	1	131	1	-0.065527
PLA2G5	5	0.95624	0.95343	1	4200	0	0.17305	0.011806	0.042791	1	172	3	0.17305
ACTN2	6	0.91946	0.9216	1	4042	0	0.10113	0.0092288	0.04322	1	134	2	0.10113
KCNK10	6	0.60944	0.71663	1	3066	1	0.032546	0.0091693	0.04322	1	132	3	0.032546
TAC4	6	0.024694	0.080441	1	315	1	-0.011792	0.0091776	0.04322	1	133	2	-0.011792
RYR3	6	0.10516	0.2363	1	1028	3	-0.12027	0.0093893	0.04322	1	135	2	-0.12027
AXL	6	0.85147	0.86342	1	3754	1	0.20515	0.0095472	0.043221	1	137	4	0.20515
CPA3	6	0.19327	0.37479	1	1624	2	-0.080546	0.0095131	0.043221	1	136	2	-0.080546
SIRT1	6	0.41081	0.54922	1	2494	1	0.2337	0.0098013	0.043609	1	138	3	0.2337
IFNGR2	6	0.47278	0.6298	1	2717	1	-0.0010886	0.0098294	0.043609	1	140	2	-0.0010886
KCNH1	6	0.49769	0.65289	1	2803	2	-0.032046	0.0098294	0.043609	1	141	2	-0.032046
MYH6	6	0.012484	0.048489	1	164	2	-0.034722	0.0098294	0.043609	1	139	2	-0.034722
KCND3	6	0.42389	0.55961	1	2536	1	0.24571	0.0099812	0.043611	1	144	4	0.24571
CASP2	6	0.80713	0.81235	1	3570	1	0.19331	0.0098951	0.043611	1	142	4	0.19331
SIGLEC8	6	0.96708	0.9662	1	4250	0	0.17632	0.0099316	0.043611	1	143	3	0.17632
CD53	6	0.76068	0.7782	1	3424	1	0.15977	0.010195	0.044383	1	145	4	0.15977
RRM2B	6	0.57261	0.70399	1	2988	1	0.18585	0.010211	0.044512	1	146	4	0.18585
UCN3	6	0.044202	0.13772	1	524	4	-0.17615	0.010269	0.044512	1	147	2	-0.17615
BMPR1A	6	0.75061	0.77704	1	3390	1	0.048693	0.010489	0.045205	1	148	1	0.048693
BPHL	6	0.97739	0.97613	1	4288	0	0.21698	0.010623	0.045207	1	149	4	0.21698
CYP26A1	6	0.15282	0.30871	1	1354	1	0.18489	0.010763	0.046005	1	152	4	0.18489
EP300	6	0.90807	0.91082	1	3994	0	0.12942	0.010703	0.046005	1	150	3	0.12942
PTGDR	6	0.511	0.66647	1	2855	2	0.057834	0.010709	0.046005	1	151	2	0.057834
METAP1	6	0.71208	0.7611	1	3306	1	0.20667	0.010838	0.046007	1	154	4	0.20667
CYP4A22	6	0.87508	0.88067	1	3842	0	0.093759	0.0108	0.046007	1	153	3	0.093759
TIMP2	6	0.25696	0.43199	1	1897	1	0.23531	0.010947	0.046327	1	155	3	0.23531
CDK11B	6	0.783	0.78966	1	3494	1	0.08388	0.010985	0.046327	1	156	3	0.08388
DDR1	6	0.0028876	0.0096758	0.960602	52	2	0.038776	0.011105	0.046327	1	157	3	0.038776
IGLV5-37	6	0.35067	0.49937	1	2243	1	0.24933	0.01126	0.046329	1	159	4	0.24933
FURIN	6	0.064196	0.17033	1	727	1	0.13741	0.011386	0.046329	1	163	3	0.13741
BCL2L10	6	0.030112	0.096233	1	373	1	0.086468	0.01133	0.046329	1	160	3	0.086468
PON1	6	0.38694	0.52691	1	2388	2	-0.018127	0.011358	0.046329	1	161	2	-0.018127
TNFSF11	6	0.045541	0.14168	1	539	3	-0.066001	0.011149	0.046329	1	158	1	-0.066001
SERPINA3	6	0.66669	0.74512	1	3192	1	0.12131	0.011443	0.046467	1	165	3	0.12131
TRHR	6	0.37414	0.51449	1	2339	1	0.11753	0.011415	0.046467	1	164	3	0.11753
CCL16	6	0.93027	0.92713	1	4102	0	0.18487	0.011577	0.046468	1	166	3	0.18487
ABCC2	6	0.91954	0.9216	1	4044	0	0.1607	0.011785	0.046906	1	171	3	0.1607
F11	6	0.97943	0.97744	1	4298	0	0.087123	0.011698	0.046906	1	170	2	0.087123
AHR	6	0.56101	0.69952	1	2965	1	0.049563	0.011698	0.046906	1	167	2	0.049563
HSD17B14	6	0.35036	0.49937	1	2242	1	0.0063276	0.011698	0.046906	1	169	2	0.0063276
GABRG3	6	0.72954	0.77015	1	3338	1	-0.03368	0.011698	0.046906	1	168	2	-0.03368
PLD2	6	0.57053	0.70399	1	2983	1	0.1501	0.011853	0.046908	1	173	3	0.1501
KAT2B	6	0.019216	0.069091	1	257	3	0.11873	0.011914	0.046908	1	174	3	0.11873
PLA2G2F	6	0.87799	0.88467	1	3858	0	0.2782	0.01211	0.047198	1	175	4	0.2782
GRM6	6	0.50657	0.66401	1	2836	1	0.0037581	0.012247	0.0472	1	176	1	0.0037581
TNNC1	6	0.97392	0.9725	1	4271	0	0.2167	0.012327	0.047524	1	177	4	0.2167
GPC4	6	0.85948	0.86564	1	3786	0	0.1466	0.012395	0.047664	1	178	3	0.1466
NAT2	6	0.94839	0.95036	1	4168	0	0.10608	0.012484	0.048362	1	180	3	0.10608
ARAF	6	0.25245	0.43199	1	1880	1	0.047211	0.012466	0.048362	1	179	2	0.047211
IGHV1-46	6	0.62223	0.72559	1	3090	1	0.15311	0.012507	0.048364	1	181	3	0.15311
CHEK2	6	0.93199	0.92781	1	4108	0	0.2014	0.01272	0.048809	1	183	4	0.2014
CD302	6	0.77811	0.78505	1	3478	1	-0.017662	0.012686	0.048809	1	182	1	-0.017662
GH2	6	0.0043172	0.015214	0.963832	84	2	-0.014519	0.012905	0.04912	1	185	3	-0.014519
CPT1B	6	0.28763	0.45783	1	2009	2	-0.031602	0.01284	0.04912	1	184	2	-0.031602
RANBP2	6	0.11345	0.24581	1	1084	1	0.30057	0.013032	0.049122	1	188	4	0.30057
TARS	6	0.64788	0.73937	1	3141	1	0.18067	0.01296	0.049122	1	187	3	0.18067
NECTIN3	6	0.09672	0.22877	1	964	2	0.15281	0.012946	0.049122	1	186	4	0.15281
WNK1	6	0.29475	0.46348	1	2031	1	0.15055	0.013184	0.050024	1	189	4	0.15055
CDH13	6	0.76681	0.78267	1	3445	1	0.050517	0.013261	0.050997	1	191	3	0.050517
PRDX4	6	0.098376	0.22955	1	977	2	-0.0049652	0.013234	0.050997	1	190	2	-0.0049652
CPB2	6	0.80764	0.81235	1	3574	1	0.2316	0.013321	0.050999	1	193	4	0.2316
PMCH	6	0.92155	0.92302	1	4056	0	0.17457	0.013318	0.050999	1	192	4	0.17457
NCOR2	6	0.92915	0.92713	1	4097	0	0.085123	0.013413	0.05117	1	194	2	0.085123
ST14	6	0.8407	0.85089	1	3705	1	0.16754	0.013599	0.051172	1	197	3	0.16754
RIPK4	6	0.8211	0.83043	1	3629	1	0.14697	0.013563	0.051172	1	196	3	0.14697
NR1H2	5	0.21073	0.35182	1	1730	1	0.20395	0.013512	0.0524	1	195	3	0.20395
OR2T29	2	0.10632	0.15023	1	1033	1	0.01698	0.021289	0.053922	1	284	1	0.01698
IGLV2-18	5	0.58916	0.66588	1	3017	1	0.22732	0.01479	0.05548	1	211	3	0.22732
MAPK9	6	0.59232	0.71203	1	3026	1	0.023916	0.013873	0.056018	1	198	2	0.023916
PROK1	6	0.94676	0.94832	1	4163	0	0.083382	0.013935	0.056165	1	199	2	0.083382
TLK1	6	0.077755	0.18838	1	828	1	0.0076238	0.014002	0.056167	1	200	1	0.0076238
GPR31	6	0.80132	0.79979	1	3552	1	0.19024	0.014032	0.05632	1	201	4	0.19024
GSTA4	6	0.99631	0.9961	1	4370	0	0.23097	0.014272	0.056776	1	204	4	0.23097
SLC12A6	6	0.90673	0.91082	1	3987	0	0.15873	0.014222	0.056776	1	203	4	0.15873
PDE1B	6	0.83523	0.84535	1	3683	1	0.155	0.014221	0.056776	1	202	2	0.155
ATP2C1	6	0.92319	0.92576	1	4063	0	0.18268	0.014378	0.056778	1	205	3	0.18268
MIA	6	0.67875	0.75215	1	3232	1	0.10555	0.01444	0.056778	1	207	2	0.10555
CPB1	6	0.1957	0.37773	1	1638	3	0.0070315	0.014404	0.056778	1	206	3	0.0070315
ABCA7	6	0.95184	0.95288	1	4183	0	0.13002	0.014482	0.057167	1	208	3	0.13002
RAET1G	6	0.98528	0.98446	1	4325	0	0.15762	0.01453	0.057557	1	209	4	0.15762
XYLT1	6	0.84586	0.85653	1	3728	1	0.0042648	0.014659	0.05775	1	210	2	0.0042648
CASP1	6	0.21967	0.40233	1	1765	1	0.24076	0.01497	0.058164	1	214	4	0.24076
SMG1	6	0.46202	0.61479	1	2683	1	0.16274	0.014887	0.058164	1	213	3	0.16274
GRK1	6	0.50915	0.66524	1	2848	1	0.087703	0.014878	0.058164	1	212	2	0.087703
KHDRBS1	6	0.20272	0.38845	1	1682	2	-0.01051	0.015097	0.058166	1	215	1	-0.01051
AZGP1	6	0.092173	0.22127	1	929	1	0.27869	0.015362	0.063093	1	217	3	0.27869
CHIT1	6	0.99027	0.98896	1	4345	0	0.25945	0.015687	0.063093	1	221	4	0.25945
FOLH1	6	0.79789	0.79641	1	3540	1	0.21764	0.015613	0.063093	1	220	3	0.21764
FKBP8	6	0.06081	0.1675	1	686	3	0.11516	0.015358	0.063093	1	216	3	0.11516
BCL2L2	6	0.12651	0.25896	1	1177	2	0.01835	0.015426	0.063093	1	218	3	0.01835
SCUBE3	6	0.57987	0.70735	1	3003	1	0.0091003	0.015556	0.063093	1	219	2	0.0091003
CYP2S1	6	0.25904	0.43403	1	1904	1	0.20952	0.015787	0.063095	1	223	4	0.20952
LAMB4	6	0.95194	0.95288	1	4184	0	0.17886	0.015971	0.063095	1	224	4	0.17886
LEFTY2	6	0.3923	0.52975	1	2413	1	0.16587	0.015754	0.063095	1	222	4	0.16587
COL10A1	6	0.99499	0.995	1	4365	0	0.1484	0.016091	0.063095	1	226	4	0.1484
AAK1	6	0.44139	0.58404	1	2608	2	-0.020903	0.016049	0.063095	1	225	2	-0.020903
SLPI	6	0.39734	0.53322	1	2435	1	0.13321	0.016197	0.063338	1	229	3	0.13321
C1R	6	0.39596	0.53322	1	2430	2	0.10272	0.016192	0.063338	1	227	2	0.10272
IGFALS	6	0.059359	0.1658	1	676	3	-0.10464	0.016192	0.063338	1	228	1	-0.10464
VIP	6	0.6785	0.75215	1	3231	1	0.20746	0.01681	0.065195	1	232	4	0.20746
P2RY13	6	0.12124	0.25449	1	1134	1	0.20593	0.016859	0.065195	1	234	4	0.20593
CNGB3	6	0.84746	0.85881	1	3737	1	0.19989	0.01669	0.065195	1	230	4	0.19989
IL18	6	0.46637	0.62001	1	2693	2	0.12294	0.016743	0.065195	1	231	3	0.12294
ST3GAL4	6	0.0040178	0.014475	0.961768	77	4	-0.24412	0.016848	0.065195	1	233	1	-0.24412
KCNJ5	6	0.95485	0.95566	1	4196	0	0.18671	0.017064	0.065197	1	236	4	0.18671
GALP	6	0.51965	0.67536	1	2892	2	0.11536	0.01713	0.065197	1	237	3	0.11536
HCN2	6	0.35655	0.50049	1	2266	2	-0.036161	0.01702	0.065197	1	235	2	-0.036161
NR3C1	6	0.89	0.89987	1	3906	0	0.18283	0.017212	0.065528	1	238	4	0.18283
SLCO1C1	6	0.68617	0.75323	1	3248	1	0.018535	0.017285	0.065864	1	239	3	0.018535
CYP1A1	6	0.81704	0.82599	1	3616	1	0.19229	0.017556	0.066068	1	240	4	0.19229
HPD	6	0.76256	0.77936	1	3430	1	0.22655	0.017712	0.066888	1	241	4	0.22655
FRZB	6	0.92147	0.92302	1	4055	0	0.15243	0.017722	0.066888	1	242	3	0.15243
LOXL1	6	0.36212	0.50641	1	2288	1	-0.030836	0.017722	0.066888	1	243	1	-0.030836
HSP90B1	6	0.93325	0.92979	1	4112	0	0.14824	0.017912	0.06805	1	244	4	0.14824
MUC13	5	0.58721	0.66588	1	3009	1	0.19018	0.019343	0.068311	1	259	3	0.19018
IGHG4	6	0.51001	0.66524	1	2851	1	0.24164	0.018111	0.068381	1	245	4	0.24164
KIR2DL4	6	0.99494	0.995	1	4364	0	0.16331	0.018159	0.068381	1	246	4	0.16331
F2RL3	6	0.27483	0.44423	1	1967	2	0.088267	0.018159	0.068381	1	247	1	0.088267
PLA2G4A	6	0.097684	0.22877	1	970	1	0.043464	0.018401	0.068911	1	249	2	0.043464
TNF	6	0.90302	0.90917	1	3967	0	-0.034205	0.018378	0.068911	1	248	2	-0.034205
NRG1	6	0.93253	0.92781	1	4110	0	0.15222	0.018494	0.070113	1	250	4	0.15222
BMP8B	6	0.91894	0.92085	1	4040	0	0.08349	0.018596	0.070115	1	251	3	0.08349
NR2E1	6	0.13902	0.27638	1	1263	3	-0.055706	0.018814	0.070301	1	252	1	-0.055706
IGLC7	6	0.05584	0.16083	1	649	3	-0.065193	0.018824	0.070301	1	253	2	-0.065193
GPR84	6	0.80407	0.80791	1	3558	1	0.16847	0.018932	0.070523	1	254	4	0.16847
EGFLAM	6	0.76055	0.7782	1	3423	1	0.16605	0.019203	0.071527	1	257	4	0.16605
ZP3	6	0.92212	0.92446	1	4058	0	0.14636	0.019163	0.071527	1	255	3	0.14636
HTR3B	6	0.98769	0.98705	1	4332	0	0.13877	0.019178	0.071527	1	256	4	0.13877
HUNK	6	0.011588	0.04738	1	155	3	-0.070159	0.019251	0.071735	1	258	1	-0.070159
NUAK2	6	0.03572	0.11179	1	428	1	0.1375	0.019468	0.072119	1	260	3	0.1375
TRPV2	6	0.88435	0.89347	1	3880	0	0.088684	0.019469	0.072119	1	261	3	0.088684
CYP4F2	6	0.91487	0.91803	1	4026	0	0.18447	0.019626	0.072445	1	262	4	0.18447
GRK4	6	0.92091	0.92223	1	4050	0	0.092136	0.019687	0.073226	1	263	3	0.092136
TTBK2	6	0.91742	0.91947	1	4036	0	0.04668	0.019793	0.073448	1	264	2	0.04668
CDH2	6	0.018596	0.067758	1	248	1	0.20824	0.019828	0.07345	1	265	4	0.20824
ITGB4	6	0.34837	0.49769	1	2238	2	0.070191	0.019905	0.073783	1	266	3	0.070191
METRN	6	0.17626	0.35577	1	1502	2	0.083604	0.019934	0.074033	1	267	3	0.083604
ABL1	6	0.72722	0.76792	1	3334	1	0.17348	0.020006	0.074035	1	268	4	0.17348
RNASE9	6	0.89272	0.90161	1	3923	0	0.055159	0.020123	0.074241	1	270	2	0.055159
PODN	6	0.072976	0.17904	1	793	2	-0.0025719	0.020121	0.074241	1	269	2	-0.0025719
CACNG2	6	0.93012	0.92713	1	4100	0	0.13878	0.020194	0.074243	1	271	3	0.13878
CLCN2	6	0.28113	0.44674	1	1988	1	0.14762	0.020274	0.074502	1	272	4	0.14762
PTPRF	5	0.79616	0.8094	1	3535	1	0.17124	0.022619	0.074813	1	300	3	0.17124
DCLK2	6	0.32854	0.48677	1	2169	1	0.15378	0.020488	0.074848	1	274	3	0.15378
ERBB2	6	0.67772	0.75215	1	3224	1	0.095867	0.020665	0.074848	1	276	3	0.095867
RORA	6	0.22739	0.4074	1	1797	2	-0.02779	0.020559	0.074848	1	275	1	-0.02779
ITGA6	6	0.85536	0.86564	1	3768	0	-0.076385	0.020341	0.074848	1	273	1	-0.076385
CD46	6	0.22667	0.40538	1	1793	1	0.14234	0.020836	0.074849	1	277	3	0.14234
ADAM33	6	0.74262	0.77352	1	3370	1	0.033143	0.020932	0.074849	1	278	2	0.033143
SLCO4A1	6	0.45881	0.61358	1	2669	2	-0.043033	0.020995	0.074849	1	279	1	-0.043033
LMTK2	6	0.70244	0.75669	1	3287	1	0.14127	0.02116	0.075916	1	280	4	0.14127
NTSR2	6	0.77818	0.78505	1	3479	1	0.16026	0.021253	0.076124	1	282	4	0.16026
C6	6	0.8559	0.86564	1	3772	0	0.14292	0.021239	0.076124	1	281	4	0.14292
CEACAM16	6	0.10357	0.23546	1	1015	1	0.046204	0.021268	0.076124	1	283	2	0.046204
RHAG	6	0.90362	0.90917	1	3970	0	0.17681	0.021316	0.076125	1	285	3	0.17681
UGT2B28	6	0.84313	0.85201	1	3718	1	0.18181	0.021471	0.07637	1	288	4	0.18181
NPBWR2	6	0.37744	0.51552	1	2357	1	0.077564	0.021456	0.07637	1	287	3	0.077564
BTNL8	6	0.65916	0.74056	1	3175	1	0.021016	0.021431	0.07637	1	286	2	0.021016
SLC6A6	6	0.99904	0.99897	1	4386	0	0.18646	0.021649	0.076372	1	289	4	0.18646
WFIKKN1	6	0.98099	0.97915	1	4301	0	0.13349	0.021867	0.077019	1	291	4	0.13349
PLAUR	6	0.29777	0.46348	1	2048	2	-0.088953	0.021833	0.077019	1	290	2	-0.088953
SLC22A18	6	0.98057	0.97892	1	4300	0	0.22254	0.021978	0.077021	1	292	3	0.22254
IL37	6	0.8274	0.84059	1	3652	1	0.17327	0.022099	0.077865	1	294	4	0.17327
F2R	6	0.46742	0.62234	1	2697	1	0.052487	0.022137	0.077865	1	295	2	0.052487
LYZL1	6	0.020558	0.074513	1	267	4	-0.14035	0.022084	0.077865	1	293	2	-0.14035
ABCC5	6	0.78968	0.793	1	3510	1	0.16574	0.022387	0.078098	1	296	4	0.16574
AADAT	6	0.33441	0.49256	1	2190	1	0.11949	0.022443	0.0781	1	297	3	0.11949
CHST10	6	0.20831	0.39266	1	1717	2	-0.060138	0.02252	0.078312	1	298	1	-0.060138
IGIP	6	0.52116	0.67786	1	2899	1	0.17335	0.022593	0.078313	1	299	4	0.17335
GABRR1	6	0.97917	0.97692	1	4297	0	0.15304	0.022663	0.07872	1	301	4	0.15304
SBK3	6	0.87803	0.88467	1	3859	0	-0.015832	0.022737	0.079211	1	302	1	-0.015832
BPIFB4	6	0.85935	0.86564	1	3785	0	0.18327	0.02276	0.080012	1	303	4	0.18327
PTGFR	6	0.17894	0.35819	1	1524	1	0.14449	0.023067	0.08147	1	306	4	0.14449
PTGES	6	0.21912	0.40233	1	1762	1	0.14438	0.023035	0.08147	1	304	3	0.14438
OR52B2	6	0.61106	0.719	1	3069	1	0.13496	0.023053	0.08147	1	305	4	0.13496
PIP	6	0.98734	0.98656	1	4330	0	0.1595	0.023151	0.081472	1	307	4	0.1595
KRT8	6	0.56179	0.69952	1	2968	1	0.035318	0.023172	0.08184	1	308	3	0.035318
IFNL2	6	0.20778	0.39266	1	1713	2	0.12206	0.023489	0.083267	1	309	3	0.12206
KCNT2	6	0.22219	0.40234	1	1779	2	0.073854	0.023528	0.083531	1	310	3	0.073854
IGFBPL1	6	0.75393	0.77704	1	3401	1	0.025897	0.023716	0.083533	1	311	2	0.025897
RARB	6	0.84933	0.86106	1	3745	1	0.14573	0.02379	0.083787	1	312	4	0.14573
TAC1	6	0.11023	0.24342	1	1057	1	0.1057	0.024238	0.08414	1	313	3	0.1057
BACE1	6	0.77015	0.78384	1	3452	1	0.15182	0.024645	0.084142	1	317	3	0.15182
MUC15	6	0.4208	0.55686	1	2525	1	0.11123	0.024372	0.084142	1	315	3	0.11123
TDGF1	6	0.43569	0.57193	1	2586	2	0.026987	0.024368	0.084142	1	314	1	0.026987
SRD5A1	6	0.055136	0.15982	1	646	1	0.011691	0.024694	0.084142	1	318	1	0.011691
DHRSX	6	0.37007	0.51165	1	2318	2	-0.052974	0.024476	0.084142	1	316	2	-0.052974
TNC	6	0.03184	0.1045	1	388	2	0.201	0.024851	0.084412	1	319	4	0.201
CYP4F3	6	0.7549	0.77704	1	3408	1	0.1323	0.02488	0.084412	1	320	4	0.1323
NTN1	6	0.35545	0.50049	1	2261	1	0.21359	0.02494	0.084414	1	322	3	0.21359
LGMN	6	0.43625	0.57302	1	2590	1	0.19062	0.024954	0.084414	1	323	4	0.19062
PSMB9	6	0.96637	0.96582	1	4246	0	0.14492	0.024895	0.084414	1	321	4	0.14492
PTPN2	6	0.92482	0.92576	1	4072	0	0.069712	0.024956	0.084414	1	324	2	0.069712
TTN	6	0.25227	0.43199	1	1879	1	0.21989	0.025117	0.084796	1	326	4	0.21989
NLGN3	6	0.97469	0.97302	1	4277	0	0.11044	0.025117	0.084796	1	325	2	0.11044
GPR151	6	0.099476	0.23097	1	983	3	-0.027641	0.02526	0.085203	1	327	3	-0.027641
PTPRG	6	0.23221	0.40842	1	1812	2	0.16307	0.025409	0.085598	1	328	3	0.16307
STAT6	6	0.99461	0.99478	1	4362	0	0.2305	0.025521	0.0856	1	329	4	0.2305
CXCL16	6	0.98299	0.98033	1	4313	0	0.31499	0.025765	0.086181	1	330	4	0.31499
GABRA1	6	0.42302	0.55961	1	2533	2	-0.048403	0.02578	0.086181	1	331	1	-0.048403
COL18A1	6	0.62154	0.72559	1	3089	1	0.09894	0.02584	0.086183	1	332	3	0.09894
ATP2C2	6	0.67294	0.74864	1	3206	1	0.21575	0.0261	0.086576	1	336	4	0.21575
VRK1	6	0.62791	0.7267	1	3100	1	0.14611	0.026065	0.086576	1	334	4	0.14611
HSD11B2	6	0.049659	0.15159	1	594	3	-0.06504	0.025997	0.086576	1	333	3	-0.06504
SERPINA4	6	0.64602	0.73706	1	3139	1	0.14152	0.02631	0.086578	1	338	4	0.14152
FCAR	6	0.88989	0.89987	1	3905	0	-0.039256	0.026214	0.086578	1	337	1	-0.039256
IGKV1D-16	1	0.92808	0.91331	1	4090	0	0.39373	0.071917	0.086688	1	767	1	0.39373
MAPK14	6	0.81493	0.81906	1	3608	1	0.034653	0.02643	0.086839	1	339	1	0.034653
FAM3C	6	0.33502	0.49256	1	2192	2	0.055331	0.026586	0.087113	1	340	2	0.055331
HIST1H3D	6	0.25015	0.43092	1	1872	2	0.17216	0.02668	0.087115	1	343	4	0.17216
KIR2DL3	6	0.048559	0.15021	1	579	2	0.04152	0.026626	0.087115	1	341	3	0.04152
QSOX2	6	0.64909	0.73937	1	3146	1	-0.020922	0.026647	0.087115	1	342	2	-0.020922
IL15	6	0.82336	0.83495	1	3635	1	0.19813	0.026864	0.088419	1	344	3	0.19813
ADAM8	6	0.68235	0.75215	1	3242	1	0.18961	0.026882	0.08842	1	345	4	0.18961
PLSCR3	6	0.72322	0.76681	1	3324	1	0.13336	0.027053	0.089108	1	346	4	0.13336
MYT1	5	0.40321	0.5568	1	2466	1	-0.0051863	0.026092	0.089685	1	335	2	-0.0051863
GPR3	6	0.88508	0.89347	1	3885	0	0.1601	0.027291	0.090667	1	347	3	0.1601
P2RX1	6	0.87323	0.88067	1	3834	0	0.025897	0.027298	0.090667	1	348	1	0.025897
PLAA	6	0.6578	0.74056	1	3171	1	0.18901	0.027351	0.091094	1	351	4	0.18901
SLC5A4	6	0.96886	0.96836	1	4258	0	0.14268	0.02732	0.091094	1	349	4	0.14268
AOC3	6	0.30464	0.47079	1	2072	1	0.061561	0.027336	0.091094	1	350	3	0.061561
RHD	6	0.006672	0.02692	1	113	3	-0.11307	0.027417	0.091096	1	352	2	-0.11307
AVPR1B	5	0.18877	0.32675	1	1592	1	0.22235	0.028016	0.091366	1	361	3	0.22235
GALK1	6	0.039054	0.13006	1	463	2	0.20985	0.027651	0.091511	1	355	4	0.20985
ITGA2B	6	0.82611	0.84059	1	3644	1	0.20781	0.027627	0.091511	1	354	3	0.20781
NR5A2	6	0.26403	0.43617	1	1930	1	0.16108	0.027826	0.091511	1	359	4	0.16108
IGLV3-25	6	0.28273	0.44674	1	1997	1	0.12531	0.027731	0.091511	1	357	3	0.12531
SLC2A4	6	0.11445	0.24581	1	1092	1	0.12271	0.027509	0.091511	1	353	4	0.12271
DRAXIN	6	0.54767	0.69266	1	2944	1	0.12269	0.027711	0.091511	1	356	3	0.12269
GABRR2	6	0.60353	0.71662	1	3048	1	0.0071463	0.027795	0.091511	1	358	2	0.0071463
ERG	6	0.085811	0.20917	1	885	2	0.24871	0.028251	0.091513	1	364	4	0.24871
CCL28	6	0.94569	0.94739	1	4157	0	0.18008	0.028035	0.091513	1	362	3	0.18008
TUBB4B	6	0.95777	0.9583	1	4209	0	0.12571	0.027948	0.091513	1	360	3	0.12571
COL4A2	6	0.85581	0.86564	1	3771	0	0.057396	0.028164	0.091513	1	363	3	0.057396
SENP6	6	0.45149	0.59447	1	2646	2	-0.018749	0.028344	0.091761	1	365	2	-0.018749
DNMT3B	6	0.16632	0.33448	1	1432	3	0.0026648	0.028429	0.096755	1	366	3	0.0026648
OSM	6	0.011929	0.047566	1	159	2	0.23329	0.028517	0.097056	1	367	4	0.23329
ADAMTS16	5	0.012628	0.044977	1	166	4	-0.1956	0.029856	0.097264	1	379	1	-0.1956
FMO4	6	0.60424	0.71663	1	3051	1	0.15104	0.028679	0.097512	1	370	4	0.15104
CDC25C	6	0.38546	0.52691	1	2382	1	0.14892	0.028631	0.097512	1	369	4	0.14892
GH1	6	0.23948	0.41981	1	1834	2	-0.084898	0.028597	0.097512	1	368	1	-0.084898
MTNR1A	6	0.52328	0.68011	1	2908	2	-0.031143	0.028814	0.097514	1	371	1	-0.031143
GLUL	6	0.88621	0.89438	1	3890	0	0.15644	0.02894	0.097757	1	372	4	0.15644
CYP2J2	6	0.89337	0.90161	1	3927	0	0.19225	0.02907	0.097759	1	375	3	0.19225
SPACA3	6	0.49187	0.64785	1	2786	1	0.18347	0.029022	0.097759	1	373	4	0.18347
ULK3	6	0.11084	0.24342	1	1060	1	-0.075449	0.02903	0.097759	1	374	1	-0.075449
MYLK3	6	0.072351	0.17837	1	782	1	0.15844	0.029219	0.098422	1	376	4	0.15844
CEACAM7	6	0.80781	0.81235	1	3576	1	0.1859	0.030235	0.10425	1	382	4	0.1859
CDC42BPB	6	0.42933	0.5633	1	2558	1	0.17749	0.029983	0.10425	1	381	4	0.17749
VWC2	6	0.18139	0.36267	1	1535	1	0.1322	0.029679	0.10425	1	377	3	0.1322
CACNA1B	6	0.08692	0.20979	1	896	2	0.058781	0.029744	0.10425	1	378	3	0.058781
ENDOU	6	0.11023	0.24342	1	1056	3	-0.015605	0.029896	0.10425	1	380	3	-0.015605
EGLN1	6	0.28222	0.44674	1	1993	1	-0.024266	0.030328	0.10425	1	383	1	-0.024266
ADCY5	6	0.89052	0.89987	1	3912	0	0.18565	0.03076	0.10471	1	386	4	0.18565
MET	6	0.25401	0.43199	1	1887	2	0.17915	0.03076	0.10471	1	385	3	0.17915
ADAMTS9	6	0.75476	0.77704	1	3407	1	0.00037498	0.030544	0.10471	1	384	1	0.00037498
GP1BA	6	0.64368	0.73478	1	3133	1	0.087231	0.030852	0.10502	1	387	2	0.087231
G6PC	6	0.98748	0.98674	1	4331	0	0.12792	0.030976	0.10529	1	388	3	0.12792
SCN8A	6	0.55922	0.69952	1	2961	1	0.12604	0.031085	0.10529	1	389	4	0.12604
IGLV5-45	4	0.92524	0.92004	1	4075	0	0.18279	0.034919	0.10885	1	434	2	0.18279
FCGR3B	6	0.99653	0.99643	1	4373	0	0.20032	0.031293	0.10956	1	390	3	0.20032
GPR22	6	0.47108	0.62728	1	2710	1	0.24842	0.031952	0.11031	1	399	4	0.24842
HDC	6	0.47713	0.6351	1	2729	2	0.1637	0.03161	0.11031	1	391	4	0.1637
OLFM2	6	0.39952	0.53426	1	2444	1	0.1577	0.032022	0.11031	1	400	4	0.1577
CALR	6	0.46886	0.62355	1	2701	1	0.14735	0.03184	0.11031	1	395	3	0.14735
PCDHB10	6	0.87653	0.88467	1	3849	0	0.14231	0.031899	0.11031	1	398	4	0.14231
NTNG1	6	0.22075	0.40233	1	1772	1	0.13738	0.031829	0.11031	1	392	4	0.13738
INHBE	6	0.7627	0.77936	1	3431	1	0.1113	0.03184	0.11031	1	393	2	0.1113
CYP1A2	6	0.032704	0.10569	1	396	1	0.092569	0.03184	0.11031	1	396	3	0.092569
SERPINB5	6	0.64844	0.73937	1	3143	1	0.079667	0.032148	0.11031	1	404	3	0.079667
CA5A	6	0.066083	0.17333	1	737	2	0.07658	0.032025	0.11031	1	401	3	0.07658
SLC47A1	6	0.63352	0.72787	1	3112	1	0.062044	0.03184	0.11031	1	394	1	0.062044
THSD1	6	0.46716	0.62113	1	2696	1	0.056947	0.032184	0.11031	1	405	2	0.056947
CASP8	6	0.44715	0.58668	1	2628	2	0.042108	0.03184	0.11031	1	397	2	0.042108
CYP2E1	6	0.13403	0.27354	1	1227	3	0.041044	0.032099	0.11031	1	402	3	0.041044
METAP2	6	0.27479	0.44369	1	1966	1	0.036903	0.03214	0.11031	1	403	3	0.036903
SLC29A3	6	0.98389	0.98218	1	4317	0	0.16752	0.032479	0.11071	1	406	4	0.16752
SUCNR1	6	0.88646	0.89439	1	3892	0	0.14374	0.032656	0.11071	1	408	4	0.14374
ST3GAL2	6	0.17177	0.34172	1	1470	1	0.038135	0.032704	0.11071	1	409	2	0.038135
THSD4	6	0.15853	0.31678	1	1389	2	-0.022225	0.032488	0.11071	1	407	2	-0.022225
OPN1LW	6	0.99811	0.99813	1	4382	0	0.319	0.032741	0.11072	1	410	3	0.319
C6orf15	6	0.34524	0.49484	1	2232	2	0.16513	0.032915	0.11072	1	411	3	0.16513
MAPKAPK3	6	0.83834	0.84753	1	3696	1	0.14538	0.03294	0.11072	1	413	3	0.14538
KCNA4	6	0.71003	0.7611	1	3303	1	0.046862	0.032919	0.11072	1	412	3	0.046862
KCNC4	6	0.045789	0.14208	1	543	2	0.10693	0.033086	0.11101	1	414	3	0.10693
TAB1	6	0.012905	0.049041	1	172	1	0.13828	0.033351	0.11145	1	417	4	0.13828
ADH4	6	0.9613	0.96048	1	4226	0	0.078941	0.033313	0.11145	1	416	3	0.078941
HTR3D	6	0.48896	0.64387	1	2773	1	0.020755	0.033135	0.11145	1	415	1	0.020755
HIST1H4A	6	0.040603	0.13347	1	478	3	-0.14154	0.033495	0.11145	1	418	2	-0.14154
PCSK6	6	0.39515	0.53155	1	2426	1	0.13427	0.033587	0.11541	1	419	4	0.13427
UPP1	5	0.8557	0.86446	1	3769	0	0.15522	0.037261	0.11597	1	460	2	0.15522
TKT	5	0.56307	0.6513	1	2970	1	-0.082561	0.037051	0.11597	1	456	1	-0.082561
IGLV1-44	2	0.81161	0.8079	1	3599	0	0.25577	0.051767	0.11612	1	613	1	0.25577
BRDT	6	0.9981	0.99813	1	4381	0	0.15669	0.033668	0.11616	1	420	3	0.15669
SERPINC1	6	0.9976	0.99762	1	4377	0	0.13359	0.033914	0.11616	1	422	4	0.13359
KLHL7	6	0.96898	0.96836	1	4259	0	0.063984	0.033782	0.11616	1	421	3	0.063984
MCOLN2	6	0.36448	0.50641	1	2304	1	0.0508	0.033952	0.11616	1	423	3	0.0508
MAOA	6	0.6658	0.74512	1	3191	1	0.17015	0.034298	0.11647	1	425	4	0.17015
PRG2	6	0.1695	0.33632	1	1457	3	-0.13662	0.034213	0.11647	1	424	1	-0.13662
MAST1	6	0.754	0.77704	1	3402	1	0.22597	0.034789	0.11691	1	432	4	0.22597
ERBIN	6	0.39995	0.53427	1	2448	1	0.15725	0.03461	0.11691	1	428	4	0.15725
PTGIR	6	0.088073	0.21714	1	905	1	0.15158	0.034428	0.11691	1	426	3	0.15158
DDOST	6	0.69328	0.75554	1	3264	1	0.13869	0.034735	0.11691	1	431	3	0.13869
KCNK16	6	0.8658	0.87546	1	3808	0	0.12135	0.034644	0.11691	1	429	3	0.12135
EXTL2	6	0.056011	0.16083	1	653	2	0.10526	0.034689	0.11691	1	430	3	0.10526
GSTM4	6	0.97752	0.9764	1	4289	0	0.08372	0.034859	0.11691	1	433	3	0.08372
CTHRC1	6	0.11392	0.24581	1	1087	2	0.07918	0.034481	0.11691	1	427	3	0.07918
LIMK2	6	0.9984	0.99839	1	4384	0	0.1239	0.035074	0.11731	1	436	4	0.1239
CDCP1	6	0.84716	0.85763	1	3735	1	0.063663	0.035014	0.11731	1	435	3	0.063663
TUBG1	6	0.1175	0.24887	1	1109	2	0.050043	0.03529	0.11763	1	437	2	0.050043
ENAM	6	0.9785	0.97692	1	4293	0	0.17826	0.035484	0.11826	1	438	4	0.17826
GSK3B	6	0.99938	0.99929	1	4388	0	0.14873	0.03571	0.11826	1	441	4	0.14873
SERPINB6	6	0.6739	0.75097	1	3209	1	0.068143	0.035488	0.11826	1	439	3	0.068143
PSEN1	6	0.13019	0.2699	1	1202	2	-0.0033985	0.035505	0.11826	1	440	1	-0.0033985
MMP11	6	0.17174	0.34172	1	1469	2	-0.0066551	0.035854	0.11826	1	442	2	-0.0066551
AQP1	6	0.99135	0.99016	1	4352	0	0.1591	0.035958	0.11858	1	444	3	0.1591
SMC3	6	0.4483	0.58959	1	2630	2	0.094139	0.035935	0.11858	1	443	3	0.094139
ACVRL1	6	0.34683	0.49769	1	2236	2	0.13854	0.03615	0.1197	1	445	3	0.13854
KEAP1	6	0.92893	0.92713	1	4095	0	0.11173	0.0363	0.12016	1	446	3	0.11173
FLRT2	6	0.97579	0.97445	1	4283	0	0.20192	0.036353	0.12017	1	447	3	0.20192
KCNJ1	6	0.97479	0.97302	1	4278	0	0.18907	0.036392	0.12017	1	450	4	0.18907
CD69	6	0.056404	0.16083	1	656	1	0.13169	0.036379	0.12017	1	449	3	0.13169
PLA2G15	6	0.15176	0.30456	1	1351	3	-0.069385	0.036365	0.12017	1	448	1	-0.069385
SPINT3	5	0.80804	0.81472	1	3579	0	0.19007	0.038582	0.12114	1	479	3	0.19007
CHRNB4	6	0.46925	0.62355	1	2703	1	0.10753	0.03658	0.12135	1	451	2	0.10753
CSNK1D	6	0.73262	0.77015	1	3347	1	0.089807	0.036922	0.12183	1	455	3	0.089807
PTPN11	6	0.079826	0.19516	1	841	1	0.08829	0.036655	0.12183	1	453	2	0.08829
ABCB7	6	0.90251	0.90917	1	3966	0	0.0092375	0.036608	0.12183	1	452	2	0.0092375
APOO	6	0.83222	0.84292	1	3670	1	-0.062682	0.036795	0.12183	1	454	2	-0.062682
HTN3	3	0.74133	0.73234	1	3367	0	0.23953	0.04751	0.12523	1	572	2	0.23953
BTN1A1	6	0.72526	0.76792	1	3328	1	0.15792	0.037149	0.12628	1	457	3	0.15792
USH2A	6	0.09033	0.22067	1	917	1	0.24777	0.037336	0.12658	1	462	4	0.24777
MUC7	6	0.14682	0.29241	1	1317	1	0.18562	0.037238	0.12658	1	459	4	0.18562
BDNF	6	0.72617	0.76792	1	3331	1	0.16657	0.03751	0.12658	1	464	4	0.16657
FGF12	6	0.27513	0.44478	1	1969	1	0.14333	0.037368	0.12658	1	463	3	0.14333
ACKR2	6	0.16677	0.33448	1	1436	2	0.14011	0.037296	0.12658	1	461	4	0.14011
GUSB	6	0.81054	0.81349	1	3592	1	-0.016512	0.037225	0.12658	1	458	2	-0.016512
CMA1	6	0.96323	0.96248	1	4234	0	0.1634	0.037659	0.12745	1	466	3	0.1634
PXDN	6	0.00055436	0.0029997	0.937005	12	2	-0.088699	0.037655	0.12745	1	465	2	-0.088699
TRBV7-1	6	0.074017	0.18048	1	804	1	0.1309	0.037798	0.12792	1	467	3	0.1309
CDH3	6	0.27173	0.44264	1	1957	1	0.16381	0.037847	0.12835	1	468	3	0.16381
TNNI3K	6	0.26178	0.43513	1	1919	2	0.13984	0.037999	0.12835	1	470	4	0.13984
CLCN3	6	0.65094	0.73937	1	3152	1	0.1029	0.038038	0.12835	1	471	4	0.1029
TTK	6	0.93363	0.93118	1	4115	0	0.028015	0.038084	0.12835	1	472	1	0.028015
CHRNB1	6	0.065406	0.17211	1	732	2	-0.14642	0.03787	0.12835	1	469	1	-0.14642
EFEMP2	6	0.49902	0.65535	1	2809	2	0.19695	0.038526	0.12873	1	477	3	0.19695
SLC12A2	6	0.99648	0.99637	1	4372	0	0.15153	0.038294	0.12873	1	474	4	0.15153
RPS6KB2	6	0.99667	0.99661	1	4375	0	0.14667	0.038531	0.12873	1	478	4	0.14667
EPDR1	6	0.98101	0.97915	1	4302	0	0.14533	0.038314	0.12873	1	475	4	0.14533
NPFFR1	6	0.20651	0.39047	1	1707	2	-0.10961	0.038231	0.12873	1	473	2	-0.10961
BCL2L2-PABPN1	6	0.10415	0.23546	1	1020	3	-0.14164	0.038406	0.12873	1	476	2	-0.14164
PPP1CA	6	0.84299	0.85201	1	3716	1	0.21008	0.03867	0.12912	1	480	4	0.21008
TPH1	6	0.229	0.40842	1	1804	1	0.15834	0.039349	0.12912	1	486	4	0.15834
UCN2	6	0.96559	0.96473	1	4244	0	0.13232	0.038829	0.12912	1	482	4	0.13232
BLK	6	0.34374	0.49373	1	2226	2	0.11075	0.03946	0.12912	1	488	3	0.11075
CD247	6	0.92923	0.92713	1	4098	0	0.071843	0.039158	0.12912	1	485	1	0.071843
GRM7	6	0.52463	0.68011	1	2916	1	0.046393	0.038943	0.12912	1	483	2	0.046393
CTRC	6	0.046805	0.14799	1	555	2	0.0053963	0.039005	0.12912	1	484	3	0.0053963
TNFRSF12A	6	0.66828	0.74625	1	3197	1	-0.094366	0.039372	0.12912	1	487	2	-0.094366
TUFT1	6	0.0045382	0.016179	0.974202	89	3	-0.10876	0.038728	0.12912	1	481	2	-0.10876
RLN3	6	0.9264	0.92576	1	4082	0	0.11949	0.03957	0.12946	1	489	3	0.11949
HIST1H3E	6	0.12305	0.25805	1	1147	2	0.15843	0.03959	0.13371	1	490	4	0.15843
NEK11	6	0.62124	0.72559	1	3087	1	0.17662	0.039626	0.13411	1	491	3	0.17662
CACNG6	6	0.84275	0.85201	1	3715	1	0.066162	0.039688	0.13443	1	492	3	0.066162
PRSS53	6	0.99768	0.99767	1	4378	0	0.155	0.039753	0.13526	1	493	4	0.155
OBSCN	6	0.73185	0.77015	1	3342	1	0.15493	0.039959	0.13612	1	494	3	0.15493
SLC5A6	6	0.30954	0.47283	1	2102	1	0.1196	0.040015	0.13612	1	495	2	0.1196
GUCA2B	6	0.68286	0.75215	1	3243	1	0.16156	0.040238	0.13613	1	497	4	0.16156
TOP2B	6	0.29789	0.46348	1	2049	1	0.12384	0.040281	0.13613	1	498	4	0.12384
RETNLB	6	0.36189	0.50641	1	2287	2	0.019239	0.04023	0.13613	1	496	2	0.019239
EGFL6	6	0.92131	0.92302	1	4053	0	0.17118	0.040462	0.13661	1	500	3	0.17118
SLC40A1	6	0.48896	0.64387	1	2772	2	0.153	0.040659	0.13661	1	505	3	0.153
NRG4	6	0.95904	0.95876	1	4214	0	0.14527	0.040588	0.13661	1	501	4	0.14527
CTSV	6	0.68865	0.75554	1	3257	1	0.11933	0.040629	0.13661	1	502	4	0.11933
PENK	6	0.50188	0.65535	1	2824	1	0.073682	0.040631	0.13661	1	503	3	0.073682
MMP26	6	0.81076	0.81349	1	3593	1	0.060593	0.040444	0.13661	1	499	2	0.060593
NOD2	6	0.90512	0.90999	1	3981	0	0.013059	0.040721	0.13661	1	506	2	0.013059
XCL1	6	0.85056	0.86342	1	3751	1	-0.056052	0.040658	0.13661	1	504	1	-0.056052
IL26	6	0.33013	0.4904	1	2175	1	0.11055	0.041082	0.13772	1	507	3	0.11055
SLC6A8	6	0.56921	0.70399	1	2980	1	0.036931	0.041087	0.13772	1	508	2	0.036931
CACNA1G	6	0.35355	0.50049	1	2255	2	0.15276	0.041144	0.13805	1	509	4	0.15276
COL27A1	6	0.71599	0.76344	1	3313	1	0.11978	0.041414	0.13845	1	511	4	0.11978
HRH2	6	0.61478	0.72119	1	3077	1	0.10542	0.041316	0.13845	1	510	3	0.10542
F3	6	0.9898	0.98854	1	4344	0	0.13331	0.041747	0.13927	1	512	4	0.13331
FGF10	6	0.57707	0.70511	1	2998	1	0.16822	0.042187	0.13965	1	518	4	0.16822
COL15A1	6	0.79877	0.79755	1	3544	1	0.11669	0.042079	0.13965	1	517	3	0.11669
KLK5	6	0.41925	0.55365	1	2515	2	0.077116	0.041943	0.13965	1	515	3	0.077116
ENTPD1	6	0.86687	0.87649	1	3813	0	0.073164	0.042252	0.13965	1	519	3	0.073164
GDF11	6	0.00011089	0.00078233	0.937005	4	2	0.0067074	0.041943	0.13965	1	513	1	0.0067074
ACKR1	6	0.096133	0.2273	1	958	3	-0.048817	0.041943	0.13965	1	516	2	-0.048817
WFDC2	6	0.012662	0.048675	1	167	4	-0.18606	0.041943	0.13965	1	514	1	-0.18606
TLN1	6	0.0047591	0.01699	0.983794	92	2	0.13457	0.042504	0.14077	1	520	4	0.13457
CTRB1	6	0.62262	0.72559	1	3092	1	0.094326	0.042585	0.14077	1	521	3	0.094326
NOS3	6	0.52797	0.68237	1	2923	1	0.15454	0.042655	0.14122	1	522	3	0.15454
KIT	6	0.95452	0.95566	1	4194	0	0.096056	0.042668	0.14122	1	523	2	0.096056
MPI	6	0.71193	0.7611	1	3305	1	0.13612	0.042843	0.14158	1	524	4	0.13612
VDR	5	0.67602	0.70418	1	3218	1	0.26313	0.045545	0.14195	1	553	3	0.26313
CACNA2D2	6	0.82451	0.8383	1	3638	1	0.17015	0.043177	0.14285	1	525	3	0.17015
LYZL6	6	0.98902	0.98785	1	4338	0	0.14147	0.043235	0.14285	1	527	3	0.14147
GRIN2D	6	0.67198	0.74743	1	3204	1	0.11403	0.043224	0.14285	1	526	3	0.11403
C4BPA	6	0.87275	0.88067	1	3832	0	0.064508	0.043275	0.14285	1	528	2	0.064508
FGF18	6	0.18719	0.36817	1	1577	1	0.15508	0.043312	0.14286	1	529	4	0.15508
EPHA7	6	0.52379	0.68011	1	2911	2	0.14992	0.043409	0.14286	1	530	4	0.14992
CREG2	6	0.7592	0.7782	1	3418	1	0.072246	0.04344	0.14472	1	532	3	0.072246
ADAMTS2	6	0.97343	0.97249	1	4268	0	0.061491	0.04344	0.14472	1	531	2	0.061491
PRKCE	6	0.4291	0.5633	1	2556	2	0.033135	0.04344	0.14472	1	533	1	0.033135
IGFBP1	6	0.95527	0.95661	1	4197	0	0.13501	0.043505	0.14658	1	535	4	0.13501
FCGR3A	6	0.97424	0.9725	1	4273	0	0.11428	0.043478	0.14658	1	534	3	0.11428
PLAC1	6	0.61588	0.72119	1	3079	1	0.10351	0.043548	0.14658	1	536	4	0.10351
NOTUM	6	0.41543	0.5509	1	2504	1	0.15309	0.043586	0.14659	1	537	3	0.15309
MYLK	6	0.8047	0.80791	1	3559	1	-0.084277	0.043885	0.14699	1	538	2	-0.084277
CCND1	5	0.70431	0.71471	1	3293	1	0.19822	0.047549	0.1473	1	573	3	0.19822
HLA-A	3	0.18222	0.28713	1	1541	1	-0.0075642	0.063323	0.14798	1	703	1	-0.0075642
EPHB6	6	0.95121	0.95288	1	4181	0	0.14767	0.044348	0.14824	1	543	4	0.14767
CHRM2	6	0.8485	0.85991	1	3742	1	0.14218	0.044232	0.14824	1	541	3	0.14218
CXCR4	6	0.4303	0.56331	1	2564	1	0.11978	0.044291	0.14824	1	542	3	0.11978
LRRC4C	6	0.81159	0.81463	1	3598	1	0.1014	0.04409	0.14824	1	540	3	0.1014
CCL26	6	0.7043	0.75887	1	3292	1	-0.052897	0.044508	0.14824	1	544	1	-0.052897
MYLK2	6	0.18706	0.36817	1	1576	2	-0.11983	0.044081	0.14824	1	539	1	-0.11983
OR4K5	6	0.12779	0.26488	1	1186	3	-0.036053	0.044653	0.14864	1	545	2	-0.036053
BMP15	6	0.4468	0.58668	1	2627	2	0.069291	0.044705	0.14865	1	546	3	0.069291
GYPB	4	0.79311	0.79859	1	3524	0	0.13016	0.050315	0.14979	1	594	2	0.13016
CSH2	5	0.80715	0.81472	1	3571	0	0.11796	0.048612	0.15099	1	579	2	0.11796
ADAMTS5	5	0.70288	0.71471	1	3289	1	0.22984	0.049421	0.1514	1	582	3	0.22984
EIF4A1	6	0.92795	0.92576	1	4089	0	0.20448	0.044765	0.15232	1	547	3	0.20448
GLO1	6	0.38086	0.51835	1	2368	2	0.031976	0.044935	0.15232	1	548	2	0.031976
SAA2	6	0.31986	0.47986	1	2132	2	0.11581	0.045157	0.15272	1	550	4	0.11581
HSD3B7	6	0.86167	0.86794	1	3799	0	0.10585	0.045149	0.15272	1	549	3	0.10585
EPCAM	6	0.95835	0.95875	1	4211	0	0.14238	0.045312	0.15362	1	552	4	0.14238
PGLYRP2	6	0.62927	0.72786	1	3102	1	0.088264	0.045271	0.15362	1	551	3	0.088264
ENOX2	6	0.74434	0.77474	1	3375	1	0.19923	0.045621	0.15442	1	555	4	0.19923
CYP3A4	6	0.35264	0.50049	1	2248	2	0.17276	0.045599	0.15442	1	554	4	0.17276
CYP2W1	6	0.90624	0.91082	1	3985	0	0.1293	0.045665	0.15442	1	556	4	0.1293
LPAR1	5	0.0554	0.13352	1	648	3	-0.17819	0.050071	0.15494	1	591	2	-0.17819
MPO	6	0.5628	0.70171	1	2969	1	0.12421	0.045781	0.15521	1	557	3	0.12421
CCNA2	6	0.94809	0.94986	1	4166	0	0.14379	0.045821	0.15561	1	558	4	0.14379
CPZ	6	0.86081	0.86679	1	3791	0	0.13866	0.046266	0.15561	1	565	4	0.13866
KCNQ5	6	0.52714	0.68011	1	2921	1	0.13179	0.04611	0.15561	1	563	4	0.13179
CAMP	6	0.019687	0.069093	1	259	1	0.12681	0.045901	0.15561	1	559	3	0.12681
WNT11	6	0.79595	0.79533	1	3533	1	0.087682	0.045996	0.15561	1	561	3	0.087682
EYS	6	0.85336	0.86564	1	3762	1	0.083586	0.046216	0.15561	1	564	2	0.083586
REG1A	6	0.56546	0.70288	1	2973	1	0.076285	0.045945	0.15561	1	560	2	0.076285
DHRS7B	6	0.24591	0.4269	1	1857	2	-0.036337	0.046002	0.15561	1	562	2	-0.036337
ABCC12	6	0.89014	0.89987	1	3909	0	0.13881	0.04667	0.15641	1	567	4	0.13881
FKBP5	6	0.75777	0.7782	1	3415	1	0.10687	0.046558	0.15641	1	566	4	0.10687
HPSE2	6	0.99179	0.99114	1	4354	0	0.141	0.04676	0.1568	1	568	4	0.141
HDAC6	6	0.92013	0.9216	1	4046	0	0.11151	0.046901	0.15773	1	569	3	0.11151
IL36B	6	0.98398	0.98218	1	4318	0	0.16402	0.047099	0.15774	1	570	4	0.16402
KNG1	6	0.18806	0.36917	1	1584	3	0.04591	0.047636	0.15823	1	574	3	0.04591
ESR1	6	0.021431	0.075886	1	279	2	-0.049134	0.047281	0.15823	1	571	1	-0.049134
UBA6	6	0.041309	0.13347	1	484	3	-0.031715	0.047707	0.1587	1	575	3	-0.031715
CDC42	5	0.89321	0.8883	1	3925	0	0.15433	0.050603	0.15929	1	600	3	0.15433
PON2	6	0.96057	0.96003	1	4223	0	0.13876	0.048423	0.16006	1	577	4	0.13876
TNFRSF25	6	0.31643	0.47773	1	2125	1	0.068375	0.048413	0.16006	1	576	2	0.068375
CAMKK1	6	0.96016	0.95961	1	4220	0	0.045085	0.048559	0.16056	1	578	2	0.045085
GSN	6	0.18682	0.36817	1	1574	2	-0.035031	0.048771	0.16056	1	580	1	-0.035031
ADM2	6	0.10235	0.23237	1	1009	2	0.21437	0.049748	0.16271	1	587	4	0.21437
ALDH1B1	6	0.16702	0.33448	1	1440	2	0.14116	0.04947	0.16271	1	583	3	0.14116
BRD4	6	0.47912	0.63639	1	2737	1	0.13063	0.04963	0.16271	1	585	4	0.13063
TAAR9	6	0.89862	0.90584	1	3949	0	0.089639	0.04969	0.16271	1	586	3	0.089639
INSL4	6	0.72481	0.76792	1	3326	1	0.082213	0.050015	0.16271	1	589	2	0.082213
DEFB114	6	0.96869	0.96836	1	4257	0	0.080299	0.049835	0.16271	1	588	3	0.080299
TYMS	6	0.45582	0.60602	1	2658	2	-0.040524	0.049622	0.16271	1	584	1	-0.040524
KLHL2	6	0.3156	0.47773	1	2122	2	-0.051377	0.049197	0.16271	1	581	1	-0.051377
KLHL18	6	0.20164	0.38651	1	1674	2	0.14301	0.050265	0.16321	1	593	4	0.14301
NLK	6	0.90798	0.91082	1	3993	0	0.12046	0.050077	0.16321	1	592	4	0.12046
SSTR3	6	0.64387	0.73478	1	3134	1	0.11706	0.050383	0.16321	1	595	4	0.11706
GLRA4	6	0.51501	0.67023	1	2872	1	-0.03686	0.050047	0.16321	1	590	2	-0.03686
PIP4K2B	6	0.16587	0.33448	1	1431	2	0.14199	0.050684	0.16449	1	601	3	0.14199
PEPD	6	0.99197	0.99127	1	4355	0	0.13937	0.050596	0.16449	1	599	4	0.13937
SSR2	6	0.18831	0.36917	1	1586	2	0.13016	0.050525	0.16449	1	598	4	0.13016
DMD	6	0.22021	0.40233	1	1770	2	-0.013669	0.0505	0.16449	1	597	2	-0.013669
PSMB2	6	0.043785	0.13665	1	519	4	-0.19667	0.050472	0.16449	1	596	1	-0.19667
CCL3L3	6	0.045893	0.14208	1	544	2	0.19172	0.050953	0.1645	1	604	4	0.19172
PDE2A	6	0.41939	0.55365	1	2517	1	0.16912	0.050881	0.1645	1	603	4	0.16912
TRPM5	6	0.54606	0.69266	1	2941	1	0.152	0.050831	0.1645	1	602	3	0.152
ADGRE5	6	0.33551	0.49256	1	2194	1	0.1199	0.051048	0.1645	1	605	4	0.1199
B4GALT1	6	0.89028	0.89987	1	3910	0	0.11763	0.051087	0.1645	1	606	3	0.11763
PTPRJ	6	0.22562	0.4044	1	1788	2	0.16909	0.051215	0.16808	1	608	4	0.16909
NOD1	6	0.21876	0.40139	1	1759	1	0.15031	0.05112	0.16808	1	607	4	0.15031
OR52M1	6	0.80578	0.81011	1	3563	1	0.13675	0.051311	0.16808	1	609	4	0.13675
KARS	6	0.63053	0.72786	1	3106	1	0.071224	0.051534	0.16808	1	611	3	0.071224
MAP4K3	6	0.89045	0.89987	1	3911	0	0.049849	0.051321	0.16808	1	610	2	0.049849
FCRL4	6	0.42212	0.55961	1	2530	2	-0.0011725	0.051584	0.16808	1	612	2	-0.0011725
HSP90AA1	5	0.87071	0.87538	1	3825	0	0.14774	0.054985	0.17009	1	644	3	0.14774
TNFSF8	6	0.96424	0.96399	1	4239	0	0.12	0.051767	0.17168	1	614	4	0.12
WIF1	6	0.98848	0.98753	1	4335	0	0.16484	0.051911	0.17215	1	615	4	0.16484
HAGH	6	0.79578	0.79533	1	3532	1	0.11522	0.052075	0.17294	1	616	3	0.11522
GRM3	6	0.097989	0.22877	1	971	2	0.012308	0.05213	0.17342	1	617	2	0.012308
PSMB6	6	0.83899	0.8486	1	3697	1	0.16122	0.052732	0.17388	1	625	3	0.16122
UGCG	6	0.59126	0.71202	1	3023	1	0.13763	0.052732	0.17388	1	624	3	0.13763
CASP7	6	0.98151	0.97936	1	4305	0	0.13693	0.05217	0.17388	1	618	3	0.13693
LMNA	6	0.83441	0.84535	1	3680	1	0.12183	0.052677	0.17388	1	623	3	0.12183
REV3L	6	0.29362	0.46348	1	2026	2	0.096546	0.052294	0.17388	1	619	3	0.096546
STK32A	6	0.0035745	0.012842	0.960602	70	2	0.061972	0.052403	0.17388	1	620	2	0.061972
STAT3	6	0.11952	0.25197	1	1120	3	-0.062313	0.052458	0.17388	1	621	2	-0.062313
MSLN	6	0.047146	0.14799	1	560	3	-0.087917	0.052594	0.17388	1	622	1	-0.087917
UCHL3	6	0.41001	0.54922	1	2490	2	0.065437	0.05283	0.17781	1	626	3	0.065437
GLP2R	6	0.9677	0.96726	1	4252	0	0.15071	0.053101	0.17828	1	627	4	0.15071
CLCA4	6	0.25835	0.433	1	1902	1	0.11209	0.053518	0.17828	1	632	4	0.11209
SLC22A14	6	0.98306	0.98033	1	4314	0	0.11154	0.05315	0.17828	1	628	4	0.11154
NTN3	6	0.89161	0.89987	1	3918	0	0.06283	0.053172	0.17828	1	629	2	0.06283
VAMP1	6	0.82565	0.84059	1	3642	1	0.04604	0.05323	0.17828	1	630	2	0.04604
PPIH	6	0.33093	0.4904	1	2177	2	0.0067508	0.053442	0.17828	1	631	2	0.0067508
PRTN3	6	0.77754	0.78505	1	3474	1	0.13712	0.05401	0.17904	1	635	3	0.13712
MARK4	6	0.91116	0.91572	1	4013	0	0.13329	0.054433	0.17904	1	641	4	0.13329
TAAR2	6	0.36508	0.50816	1	2305	1	0.13112	0.054558	0.17904	1	642	4	0.13112
CALCRL	6	0.67806	0.75215	1	3228	1	0.1131	0.053911	0.17904	1	633	3	0.1131
SLC2A1	6	0.99559	0.9953	1	4367	0	0.11243	0.054185	0.17904	1	639	4	0.11243
TRPM7	6	0.47056	0.62728	1	2708	1	0.076217	0.054721	0.17904	1	643	3	0.076217
CSNK1G2	6	0.19632	0.37861	1	1641	3	0.041671	0.054001	0.17904	1	634	3	0.041671
NLGN4Y	6	0.442	0.58404	1	2611	1	0.030922	0.05439	0.17904	1	640	2	0.030922
ENPP6	6	0.79737	0.79641	1	3539	1	0.010632	0.054078	0.17904	1	637	2	0.010632
CST7	6	0.39189	0.52975	1	2409	2	-0.052317	0.054078	0.17904	1	636	2	-0.052317
IL24	6	0.00077242	0.0039301	0.937005	19	4	-0.28104	0.054078	0.17904	1	638	1	-0.28104
CNTF	6	0.1884	0.36917	1	1587	2	-0.073659	0.055136	0.18033	1	645	1	-0.073659
MARK3	6	0.36	0.50348	1	2283	2	0.12901	0.055333	0.18115	1	646	4	0.12901
EDDM3A	6	0.3313	0.4904	1	2179	2	0.051294	0.055618	0.18115	1	647	2	0.051294
USP7	6	0.6489	0.73937	1	3144	1	-0.0021425	0.05577	0.18115	1	648	2	-0.0021425
GPR55	6	0.97145	0.97099	1	4264	0	0.12206	0.055787	0.18156	1	649	4	0.12206
FSTL1	6	0.030238	0.096233	1	374	2	0.049635	0.056237	0.18238	1	652	3	0.049635
REG4	6	0.88209	0.89163	1	3874	0	0.028907	0.056124	0.18238	1	650	2	0.028907
MYH7	6	0.15175	0.30456	1	1350	2	0.025483	0.056177	0.18238	1	651	3	0.025483
WT1	5	0.901	0.90051	1	3956	0	0.1254	0.060248	0.18298	1	682	3	0.1254
GRK5	6	0.1775	0.35577	1	1515	3	0.024685	0.056404	0.18321	1	653	2	0.024685
BIRC5	6	0.61297	0.719	1	3073	1	-0.060748	0.056827	0.18405	1	654	1	-0.060748
ABCA1	6	0.15572	0.31558	1	1372	1	0.10948	0.056971	0.1849	1	656	3	0.10948
SLC22A12	6	0.50225	0.65535	1	2825	1	0.09469	0.056921	0.1849	1	655	3	0.09469
AMY2A	6	0.69112	0.75554	1	3262	1	-0.016491	0.057038	0.1849	1	657	2	-0.016491
OR1L8	5	0.66244	0.69889	1	3182	1	0.13784	0.062424	0.18846	1	695	2	0.13784
SLC1A1	6	0.87757	0.88467	1	3854	0	0.17776	0.057568	0.18851	1	659	3	0.17776
ELSPBP1	6	0.64067	0.73361	1	3124	1	0.16356	0.057807	0.18851	1	661	3	0.16356
PKD2L1	6	0.38972	0.52802	1	2402	2	0.095169	0.057704	0.18851	1	660	3	0.095169
GRIK5	6	0.19666	0.37861	1	1645	2	0.063309	0.057944	0.18851	1	663	3	0.063309
NTM	6	0.57653	0.70511	1	2996	1	0.023553	0.057883	0.18851	1	662	2	0.023553
PLD1	6	0.73148	0.77015	1	3341	1	0.0092797	0.057254	0.18851	1	658	2	0.0092797
KCNK13	6	0.17612	0.35577	1	1501	1	0.14413	0.058116	0.18892	1	665	3	0.14413
CCL24	6	0.40328	0.53752	1	2467	1	0.039295	0.058094	0.18892	1	664	3	0.039295
CYP26C1	6	0.67084	0.74626	1	3202	1	0.15762	0.058494	0.18893	1	668	3	0.15762
APOH	6	0.98938	0.98824	1	4341	0	0.13313	0.058322	0.18893	1	667	3	0.13313
DPP4	6	0.10117	0.23163	1	996	3	-0.12786	0.058305	0.18893	1	666	2	-0.12786
SLCO5A1	6	0.95112	0.95288	1	4179	0	0.015227	0.058516	0.18976	1	669	2	0.015227
PLIN2	6	0.14464	0.28603	1	1299	3	-0.11786	0.058622	0.18976	1	670	2	-0.11786
EFEMP1	6	0.73757	0.77125	1	3352	1	0.15528	0.059359	0.19061	1	675	3	0.15528
CSN3	6	0.98048	0.97869	1	4299	0	0.11392	0.058965	0.19061	1	672	3	0.11392
KLHL6	6	0.97904	0.97692	1	4296	0	0.11058	0.05908	0.19061	1	673	3	0.11058
CHAT	6	0.75565	0.77704	1	3411	1	0.094817	0.059359	0.19061	1	676	2	0.094817
ATF1	6	0.76383	0.77936	1	3434	1	0.082636	0.05931	0.19061	1	674	2	0.082636
GZMA	6	0.86298	0.87118	1	3802	0	0.04609	0.058937	0.19061	1	671	2	0.04609
ECM2	6	0.95718	0.95789	1	4208	0	0.083426	0.059741	0.19102	1	679	3	0.083426
LRP1	6	0.87055	0.87861	1	3824	0	0.059431	0.059944	0.19102	1	680	2	0.059431
SRM	6	0.42375	0.55961	1	2535	1	0.02355	0.059598	0.19102	1	678	2	0.02355
ALDH16A1	6	0.14744	0.29306	1	1322	3	0.012577	0.05957	0.19102	1	677	2	0.012577
KBTBD2	5	0.11132	0.2432	1	1072	3	-0.092621	0.064703	0.19148	1	710	1	-0.092621
NRXN1	6	0.17714	0.35577	1	1511	3	-0.033457	0.060202	0.19448	1	681	1	-0.033457
TUBB4A	6	0.35855	0.50049	1	2275	2	0.064356	0.060291	0.1949	1	683	3	0.064356
SIRPA	5	0.079144	0.18039	1	837	2	-0.039441	0.067678	0.19985	1	738	1	-0.039441
IGKV1-5	6	0.26248	0.43513	1	1923	2	0.092388	0.061109	0.20001	1	687	3	0.092388
LAMB2	6	0.042467	0.13536	1	496	2	0.045166	0.061278	0.20001	1	688	2	0.045166
STK10	6	0.39343	0.52975	1	2418	2	0.026789	0.061336	0.20001	1	689	3	0.026789
H1F0	6	0.13849	0.27638	1	1258	3	0.018404	0.06164	0.20001	1	691	3	0.018404
NR6A1	6	0.16243	0.32465	1	1411	1	0.013652	0.060833	0.20001	1	684	2	0.013652
GABRG1	6	0.074058	0.18048	1	805	3	0.0094951	0.061511	0.20001	1	690	2	0.0094951
KLHL24	6	0.43252	0.56605	1	2572	2	-0.063913	0.061044	0.20001	1	686	1	-0.063913
ABHD16A	6	0.055899	0.16083	1	650	3	-0.20595	0.060987	0.20001	1	685	2	-0.20595
ACP1	4	0.1708	0.27485	1	1464	1	0.039427	0.072536	0.20077	1	772	1	0.039427
APLP1	5	0.73858	0.73202	1	3356	1	-0.017045	0.068377	0.20082	1	745	2	-0.017045
SCN7A	6	0.46056	0.61479	1	2676	1	0.086439	0.062102	0.20376	1	694	3	0.086439
HP	6	0.99069	0.9891	1	4350	0	0.069884	0.062096	0.20376	1	693	2	0.069884
HDAC9	6	0.3279	0.48677	1	2166	1	0.030615	0.062037	0.20376	1	692	2	0.030615
SLC7A5	6	0.065664	0.17269	1	735	2	0.06802	0.062458	0.20421	1	696	3	0.06802
RSPO3	6	0.018612	0.067758	1	249	3	-0.044052	0.062673	0.20421	1	697	3	-0.044052
ANXA1	6	0.45923	0.61358	1	2671	1	0.0073305	0.062726	0.20461	1	698	2	0.0073305
MAOB	6	0.92456	0.92576	1	4070	0	0.072136	0.062959	0.20462	1	699	3	0.072136
TMEM9B	6	0.83242	0.84292	1	3673	1	0.15526	0.063246	0.20624	1	702	3	0.15526
NEGR1	6	0.27958	0.44674	1	1981	2	0.12657	0.06321	0.20624	1	700	3	0.12657
ATP4B	6	0.92844	0.92642	1	4092	0	0.052848	0.063211	0.20624	1	701	2	0.052848
TTR	6	0.44851	0.58959	1	2631	1	-0.013816	0.063357	0.20624	1	704	1	-0.013816
IGLC2	1	0.79608	0.79327	1	3534	0	0.19148	0.20392	0.20673	1	1648	1	0.19148
FAS	6	0.01719	0.066741	1	232	2	0.12264	0.064038	0.20752	1	706	3	0.12264
KCNC3	6	0.89354	0.90161	1	3928	0	0.05131	0.063776	0.20752	1	705	2	0.05131
CTSW	6	0.14992	0.29579	1	1338	2	-0.056682	0.064406	0.20752	1	707	1	-0.056682
PSAP	6	0.66137	0.74281	1	3180	1	0.13408	0.064657	0.20842	1	709	3	0.13408
OR1J1	6	0.9701	0.96965	1	4262	0	0.12858	0.064766	0.20842	1	712	3	0.12858
FABP4	6	0.67399	0.75097	1	3210	1	0.080154	0.064751	0.20842	1	711	3	0.080154
LAMA5	6	0.0054217	0.018681	1	99	3	-0.13838	0.064616	0.20842	1	708	2	-0.13838
CCL7	6	0.65553	0.74056	1	3166	1	0.059127	0.06487	0.20932	1	714	2	0.059127
NRXN3	6	0.081803	0.19642	1	858	2	0.0092742	0.064826	0.20932	1	713	2	0.0092742
THRB	5	0.022368	0.076613	1	288	2	0.18374	0.071465	0.20951	1	762	3	0.18374
SPINK5	6	0.94543	0.94686	1	4155	0	0.12309	0.065168	0.21022	1	715	3	0.12309
LILRB5	6	0.4285	0.5633	1	2552	1	0.11932	0.065455	0.21022	1	718	2	0.11932
BPIFB1	6	0.92708	0.92576	1	4084	0	0.088304	0.065347	0.21022	1	716	3	0.088304
GUCY2D	6	0.9082	0.91082	1	3995	0	0.050086	0.065455	0.21022	1	721	2	0.050086
PRSS33	6	0.13558	0.27539	1	1238	3	0.0045647	0.065455	0.21022	1	722	3	0.0045647
KLK10	6	0.28264	0.44674	1	1995	2	-0.028096	0.065455	0.21022	1	720	2	-0.028096
EDAR	6	0.054771	0.15926	1	642	3	-0.034957	0.065423	0.21022	1	717	3	-0.034957
KCNK6	6	0.077542	0.18838	1	824	3	-0.10303	0.065455	0.21022	1	719	2	-0.10303
APOC1	5	0.102	0.21955	1	1001	2	0.092812	0.072612	0.21103	1	775	2	0.092812
ELN	5	0.86672	0.87251	1	3811	0	0.035792	0.07256	0.21103	1	774	2	0.035792
NISCH	6	0.34007	0.49373	1	2209	1	0.15298	0.065533	0.2111	1	723	3	0.15298
PTGFRN	6	0.56739	0.70288	1	2977	1	0.11482	0.065937	0.21111	1	726	3	0.11482
TIMP3	6	0.91512	0.91803	1	4028	0	0.069895	0.065765	0.21111	1	724	3	0.069895
GART	6	0.44227	0.58404	1	2613	2	0.031965	0.065825	0.21111	1	725	2	0.031965
DERL1	6	0.89067	0.89987	1	3913	0	0.11995	0.066047	0.21199	1	727	3	0.11995
DEAF1	5	0.27776	0.40355	1	1977	1	0.11816	0.079328	0.21475	1	830	2	0.11816
HMOX1	5	0.74329	0.74402	1	3372	1	0.17112	0.079999	0.21527	1	833	3	0.17112
IL17B	5	0.029032	0.091936	1	363	2	-0.028388	0.080192	0.21527	1	835	1	-0.028388
MAP3K9	6	0.032919	0.10569	1	398	1	0.13736	0.066084	0.21529	1	728	3	0.13736
HLA-DRA	6	0.90187	0.90917	1	3960	0	0.085131	0.066424	0.21529	1	730	3	0.085131
RAMP3	6	0.20541	0.39047	1	1702	3	-0.032224	0.066293	0.21529	1	729	2	-0.032224
NTSR1	6	0.13764	0.27638	1	1251	2	-0.067348	0.066502	0.21529	1	731	1	-0.067348
TDO2	6	0.79287	0.79415	1	3522	1	0.10793	0.067131	0.21668	1	734	3	0.10793
PNLIPRP1	6	0.17105	0.33898	1	1465	3	0.010009	0.067026	0.21668	1	733	3	0.010009
GPR33	6	0.25748	0.43199	1	1898	2	-0.01953	0.066921	0.21668	1	732	2	-0.01953
VCL	6	0.088689	0.21714	1	909	1	0.21342	0.067968	0.21761	1	741	3	0.21342
LRRK1	6	0.7022	0.75669	1	3286	1	0.1166	0.068051	0.21761	1	742	3	0.1166
ATIC	6	0.93575	0.93428	1	4120	0	0.11207	0.06769	0.21761	1	739	3	0.11207
KCND2	6	0.8686	0.87754	1	3819	0	0.07037	0.067758	0.21761	1	740	3	0.07037
CST6	6	0.80898	0.81349	1	3584	1	-0.050151	0.067549	0.21761	1	736	2	-0.050151
LAMP1	6	0.16539	0.33349	1	1426	3	-0.072446	0.06734	0.21761	1	735	1	-0.072446
GNAS	6	0.13768	0.27638	1	1252	2	-0.085205	0.067569	0.21761	1	737	2	-0.085205
PPIL3	6	0.89626	0.90161	1	3937	0	0.11854	0.068357	0.2208	1	744	3	0.11854
KYNU	6	0.81026	0.81349	1	3590	1	0.056316	0.068275	0.2208	1	743	3	0.056316
PTK2B	6	0.18887	0.36917	1	1593	2	0.041903	0.068613	0.2208	1	747	3	0.041903
TSHB	6	0.12442	0.25895	1	1161	1	-0.013812	0.068386	0.2208	1	746	2	-0.013812
ADH1C	6	0.1998	0.38361	1	1662	2	-0.06927	0.068804	0.2208	1	748	2	-0.06927
COL14A1	6	0.91717	0.91947	1	4035	0	0.12936	0.068904	0.22081	1	749	3	0.12936
PRAME	6	0.51872	0.67404	1	2890	2	0.10803	0.069222	0.22081	1	750	3	0.10803
AKT1	6	0.12323	0.25805	1	1150	1	0.052882	0.06927	0.22081	1	751	2	0.052882
COL28A1	6	0.35873	0.50049	1	2278	2	-0.0041544	0.069392	0.22081	1	752	2	-0.0041544
GAPDH	6	0.10221	0.23237	1	1007	3	-0.024619	0.069431	0.22081	1	753	1	-0.024619
FOS	6	0.75455	0.77704	1	3404	1	0.074589	0.06964	0.22122	1	754	2	0.074589
HCAR2	6	0.40616	0.54102	1	2475	1	0.04897	0.069881	0.22122	1	755	2	0.04897
GABRA5	6	0.28776	0.45783	1	2010	1	0.13401	0.07039	0.22446	1	756	3	0.13401
SPINK4	6	0.67119	0.74626	1	3203	1	0.086995	0.070657	0.22581	1	757	3	0.086995
CYBB	6	0.23799	0.41249	1	1828	2	0.049038	0.070683	0.22581	1	758	1	0.049038
CD40	6	0.3573	0.50049	1	2270	1	0.15822	0.070987	0.22676	1	759	2	0.15822
MFAP1	5	0.10143	0.21877	1	997	2	0.17547	0.0855	0.22733	1	865	3	0.17547
ITGAE	6	0.49852	0.65413	1	2808	1	0.095405	0.071309	0.22764	1	761	3	0.095405
SIK3	6	0.36299	0.50641	1	2294	2	0.092049	0.07148	0.22764	1	763	3	0.092049
RPS6KA3	6	0.77048	0.78384	1	3455	1	0.020926	0.071172	0.22764	1	760	2	0.020926
SELL	6	0.90722	0.91082	1	3990	0	0.15753	0.071615	0.22765	1	764	3	0.15753
DAND5	6	0.47739	0.6351	1	2731	2	0.10779	0.071884	0.22765	1	766	3	0.10779
FARS2	6	0.56424	0.70288	1	2972	1	0.020682	0.071726	0.22765	1	765	2	0.020682
HSPD1	6	0.96144	0.96048	1	4229	0	0.15195	0.073083	0.2309	1	780	3	0.15195
PLA2G2D	6	0.75558	0.77704	1	3410	1	0.13121	0.072905	0.2309	1	776	2	0.13121
STAT1	6	0.044295	0.13772	1	525	1	0.1311	0.073628	0.2309	1	783	3	0.1311
PPWD1	6	0.64104	0.73361	1	3127	1	0.12984	0.072346	0.2309	1	771	3	0.12984
PLK4	6	0.61518	0.72119	1	3078	1	0.12945	0.072143	0.2309	1	769	3	0.12945
P2RY2	6	0.17555	0.3523	1	1497	2	0.12821	0.07256	0.2309	1	773	2	0.12821
RIOK3	6	0.18513	0.36629	1	1561	1	0.12182	0.073784	0.2309	1	784	3	0.12182
TNFRSF1B	6	0.53982	0.68992	1	2938	1	0.10853	0.074214	0.2309	1	788	3	0.10853
GPR75	6	0.96524	0.96473	1	4243	0	0.099564	0.073316	0.2309	1	781	3	0.099564
COL11A1	6	0.38954	0.52692	1	2401	2	0.071257	0.072928	0.2309	1	777	3	0.071257
PGGT1B	6	0.37474	0.51449	1	2342	1	0.051639	0.074018	0.2309	1	786	3	0.051639
CD93	6	0.83638	0.84639	1	3686	1	0.050039	0.072976	0.2309	1	779	2	0.050039
KCNN4	6	0.039158	0.1305	1	464	1	-0.017713	0.074341	0.2309	1	789	2	-0.017713
RARG	6	0.41003	0.54922	1	2491	1	-0.023119	0.073392	0.2309	1	782	1	-0.023119
PIK3R4	6	0.89779	0.9033	1	3944	0	-0.028007	0.074153	0.2309	1	787	2	-0.028007
OR2T3	6	0.41486	0.5509	1	2502	2	-0.041428	0.072222	0.2309	1	770	2	-0.041428
PSMD14	6	0.28363	0.44674	1	2000	2	-0.061143	0.072976	0.2309	1	778	1	-0.061143
NPTX2	6	0.062271	0.1685	1	709	3	-0.13557	0.074017	0.2309	1	785	1	-0.13557
SEMA7A	6	0.14454	0.28603	1	1298	3	-0.14088	0.071975	0.2309	1	768	2	-0.14088
NPPB	6	0.18756	0.36818	1	1581	1	0.051439	0.074641	0.23175	1	791	1	0.051439
NENF	6	0.07173	0.17775	1	779	3	0.0050076	0.075078	0.23175	1	792	3	0.0050076
EIF4H	6	0.067008	0.17433	1	743	3	-0.15675	0.074592	0.23175	1	790	2	-0.15675
PAK1	6	0.73859	0.77241	1	3357	1	0.14372	0.075535	0.23216	1	796	3	0.14372
OR1J2	6	0.95819	0.95875	1	4210	0	0.13219	0.075394	0.23216	1	794	3	0.13219
VEGFD	6	0.76668	0.78267	1	3444	1	0.12868	0.075671	0.23216	1	797	3	0.12868
MCAM	6	0.87473	0.88067	1	3840	0	0.11309	0.075472	0.23216	1	795	2	0.11309
PODNL1	6	0.25366	0.43199	1	1886	1	0.070737	0.075724	0.23216	1	798	2	0.070737
GPR173	6	0.17601	0.35577	1	1499	3	-0.065835	0.075851	0.23216	1	799	2	-0.065835
SLC9A1	6	0.12402	0.25895	1	1157	3	-0.07078	0.075157	0.23216	1	793	2	-0.07078
HCN1	6	0.15534	0.31389	1	1368	3	-0.11208	0.075887	0.23216	1	800	2	-0.11208
BOC	6	0.16458	0.33164	1	1420	3	-0.12511	0.076095	0.23216	1	801	2	-0.12511
TMED10	6	0.19464	0.37576	1	1632	3	-0.044644	0.076166	0.23258	1	802	2	-0.044644
OPCML	6	0.89003	0.89987	1	3907	0	0.134	0.076504	0.23341	1	803	3	0.134
INS-IGF2	6	0.26085	0.43403	1	1913	2	0.040091	0.07651	0.23341	1	804	1	0.040091
KCNE1	2	0.25679	0.2915	1	1895	1	0.015197	0.16555	0.23384	1	1397	1	0.015197
CES3	6	0.90448	0.90917	1	3977	0	0.22425	0.076926	0.23443	1	805	3	0.22425
HLA-DPB1	6	0.66775	0.74512	1	3196	1	0.14163	0.077371	0.23443	1	811	2	0.14163
FGF8	6	0.43335	0.56825	1	2577	1	0.13236	0.077302	0.23443	1	809	3	0.13236
PDE6D	6	0.19296	0.37479	1	1619	1	0.06497	0.077435	0.23443	1	812	3	0.06497
ADRA2B	6	0.071934	0.17837	1	781	2	0.043349	0.077307	0.23443	1	810	2	0.043349
IL17RB	6	0.027298	0.086416	1	341	2	0.043001	0.077102	0.23443	1	806	3	0.043001
GPR25	6	0.14482	0.28603	1	1303	2	0.039489	0.077244	0.23443	1	808	2	0.039489
NPPA	6	0.0352	0.11046	1	424	2	-0.012328	0.077548	0.23443	1	813	1	-0.012328
CNP	6	0.4662	0.61876	1	2692	2	-0.066344	0.077117	0.23443	1	807	2	-0.066344
ALB	6	0.95644	0.95743	1	4203	0	0.11876	0.078024	0.23484	1	818	3	0.11876
ZAP70	6	0.5737	0.70399	1	2991	1	0.083383	0.077863	0.23484	1	816	3	0.083383
WNT7A	6	0.66934	0.74625	1	3199	1	0.065533	0.077823	0.23484	1	815	3	0.065533
NFKBIA	6	0.059886	0.16645	1	680	3	0.063076	0.077944	0.23484	1	817	2	0.063076
IL1RN	6	0.5177	0.6729	1	2887	2	-0.0032466	0.077755	0.23484	1	814	1	-0.0032466
LGALS3	6	0.08272	0.19792	1	866	1	0.092447	0.078548	0.23936	1	822	3	0.092447
OR11A1	6	0.89921	0.90585	1	3953	0	0.09232	0.07848	0.23936	1	821	2	0.09232
PF4V1	6	0.9322	0.92781	1	4109	0	0.081274	0.078263	0.23936	1	819	3	0.081274
SIRT2	6	0.74858	0.77474	1	3384	1	-0.031517	0.078791	0.23936	1	824	1	-0.031517
SULT1E1	6	0.86696	0.87649	1	3814	0	-0.040784	0.07871	0.23936	1	823	2	-0.040784
CD86	6	0.37744	0.51552	1	2359	2	-0.056671	0.07848	0.23936	1	820	2	-0.056671
CATSPER4	5	0.65886	0.69762	1	3174	1	0.12408	0.089854	0.24028	1	890	3	0.12408
CHI3L2	5	0.069034	0.15565	1	759	2	-0.095346	0.090004	0.24106	1	891	1	-0.095346
GFER	6	0.38435	0.52316	1	2377	1	0.1513	0.079223	0.24261	1	829	2	0.1513
MAP3K14	6	0.81422	0.81798	1	3605	1	0.14345	0.079195	0.24261	1	827	3	0.14345
RRM1	6	0.55675	0.69836	1	2957	1	0.076863	0.079095	0.24261	1	825	2	0.076863
LRTOMT	6	0.057023	0.16084	1	660	3	0.0072881	0.079114	0.24261	1	826	3	0.0072881
KCNJ6	6	0.18211	0.36352	1	1540	3	-0.091284	0.079351	0.24261	1	831	2	-0.091284
CNTN4	6	0.046536	0.14272	1	553	3	-0.17496	0.079205	0.24261	1	828	1	-0.17496
OR2T34	4	0.016385	0.050581	1	220	1	0.055925	0.10113	0.24268	1	970	1	0.055925
TNFRSF4	6	0.083339	0.19792	1	869	1	0.036111	0.079763	0.24405	1	832	3	0.036111
ABCC11	6	0.33203	0.49148	1	2182	2	0.033343	0.08024	0.24405	1	836	2	0.033343
AMOT	6	0.07285	0.17904	1	789	3	-0.019134	0.080334	0.24405	1	837	3	-0.019134
JAG1	6	0.39487	0.52975	1	2423	2	-0.087982	0.080033	0.24405	1	834	2	-0.087982
GRIA1	6	0.71271	0.76226	1	3307	1	0.064354	0.080447	0.24454	1	838	3	0.064354
FFAR1	6	0.050763	0.15248	1	606	4	-0.15875	0.08086	0.24454	1	839	1	-0.15875
ALOX15B	6	0.055975	0.16083	1	651	3	-0.15711	0.081067	0.24551	1	840	1	-0.15711
AATK	6	0.99355	0.99306	1	4360	0	0.20782	0.082513	0.2496	1	846	3	0.20782
CRHBP	6	0.89168	0.89987	1	3919	0	0.11386	0.081935	0.2496	1	843	3	0.11386
PYGM	6	0.2906	0.45968	1	2019	1	0.096548	0.081738	0.2496	1	841	3	0.096548
PRSS12	6	0.75469	0.77704	1	3406	1	0.068652	0.0821	0.2496	1	844	3	0.068652
SULT1B1	6	0.16473	0.33164	1	1421	2	-0.0054244	0.082307	0.2496	1	845	2	-0.0054244
SSR1	6	0.85691	0.86564	1	3776	0	-0.012328	0.081868	0.2496	1	842	2	-0.012328
ITGB5	6	0.90922	0.91249	1	3999	0	0.087458	0.082679	0.25007	1	847	3	0.087458
IGLV3-22	6	0.8745	0.88067	1	3838	0	0.086049	0.08272	0.25007	1	848	3	0.086049
RNASE3	6	0.17648	0.35577	1	1503	3	0.0050477	0.082762	0.25007	1	849	3	0.0050477
PPIE	6	0.98198	0.97961	1	4309	0	0.11096	0.083635	0.25149	1	851	3	0.11096
FPR1	6	0.88869	0.89715	1	3899	0	0.10854	0.083955	0.25149	1	854	3	0.10854
GABRR3	6	0.87807	0.88467	1	3861	0	0.094399	0.083824	0.25149	1	853	2	0.094399
PRKD1	6	0.45643	0.60603	1	2660	2	0.012962	0.083758	0.25149	1	852	2	0.012962
F13B	6	0.013496	0.050414	1	182	3	-0.09655	0.083545	0.25149	1	850	2	-0.09655
LILRB2	6	0.31868	0.4788	1	2129	2	-0.10183	0.083957	0.25149	1	855	1	-0.10183
STEAP1	6	0.84161	0.85201	1	3711	1	0.090688	0.084576	0.25201	1	856	3	0.090688
CELSR3	6	0.9128	0.91645	1	4018	0	0.084645	0.08461	0.25201	1	857	3	0.084645
WNK2	6	0.73222	0.77015	1	3344	1	0.039452	0.084709	0.25201	1	858	2	0.039452
TUBG2	5	0.069135	0.15565	1	760	2	0.077374	0.10223	0.25377	1	977	2	0.077374
CCNB2	6	0.36427	0.50641	1	2303	2	0.11757	0.084933	0.25504	1	860	3	0.11757
COL20A1	6	0.79227	0.79415	1	3519	1	0.034495	0.084873	0.25504	1	859	2	0.034495
GPR176	6	0.40191	0.53537	1	2460	2	0.012669	0.084988	0.25504	1	861	2	0.012669
LECT2	6	0.081605	0.19642	1	856	3	-0.036835	0.085194	0.25505	1	862	2	-0.036835
ABCA4	6	0.17387	0.34693	1	1486	3	0.01602	0.085466	0.25553	1	864	3	0.01602
CGA	6	0.00037296	0.0020841	0.937005	9	5	-0.28408	0.085399	0.25553	1	863	1	-0.28408
IL17D	6	0.66106	0.74281	1	3178	1	0.20379	0.085818	0.25651	1	867	3	0.20379
AKR1B1	6	0.16136	0.32044	1	1405	3	-0.02053	0.085811	0.25651	1	866	1	-0.02053
ASPN	6	0.66952	0.74625	1	3200	1	-0.048121	0.086223	0.25651	1	868	2	-0.048121
AR	6	0.24563	0.4269	1	1855	1	0.10883	0.086634	0.25704	1	871	3	0.10883
CD58	6	0.16911	0.33632	1	1455	1	0.068046	0.086523	0.25704	1	869	3	0.068046
CYP4B1	6	0.32177	0.47986	1	2142	2	0.032317	0.08658	0.25704	1	870	3	0.032317
PRAP1	6	0.26152	0.43403	1	1918	2	-0.052874	0.08692	0.25751	1	872	2	-0.052874
SLC5A3	6	0.64471	0.73592	1	3136	1	0.051027	0.087251	0.25803	1	873	3	0.051027
MMP3	6	0.52308	0.68011	1	2906	1	0.02558	0.087457	0.25803	1	875	2	0.02558
CTSE	6	0.050684	0.15248	1	605	2	-0.044867	0.087385	0.25803	1	874	2	-0.044867
AGR2	6	0.17442	0.34693	1	1489	1	0.032017	0.087867	0.25895	1	878	1	0.032017
FGF6	6	0.35755	0.50049	1	2272	2	-0.024646	0.08785	0.25895	1	877	2	-0.024646
SLC6A18	6	0.14198	0.28166	1	1283	3	-0.12173	0.087662	0.25895	1	876	1	-0.12173
AFM	6	0.96097	0.96048	1	4224	0	0.11377	0.088689	0.25986	1	883	3	0.11377
BTN3A3	6	0.047068	0.14799	1	558	2	0.067275	0.088158	0.25986	1	880	3	0.067275
LEP	6	0.2683	0.43727	1	1945	2	0.061356	0.088894	0.25986	1	884	2	0.061356
TRPV4	6	0.047707	0.14887	1	566	1	0.029241	0.088278	0.25986	1	881	2	0.029241
IGLV3-27	6	0.11565	0.24734	1	1099	2	0.020759	0.088073	0.25986	1	879	2	0.020759
STK17B	6	0.12284	0.25805	1	1145	2	-0.0034777	0.089099	0.25986	1	885	2	-0.0034777
ADAM12	6	0.022789	0.077078	1	296	3	-0.064199	0.088484	0.25986	1	882	1	-0.064199
MUC17	6	0.67022	0.74626	1	3201	1	0.17893	0.089788	0.26084	1	889	2	0.17893
LIPM	6	0.79137	0.793	1	3516	1	0.1241	0.090054	0.26084	1	892	3	0.1241
VRK2	6	0.23387	0.40936	1	1816	2	0.10482	0.089751	0.26084	1	888	3	0.10482
TNFAIP2	6	0.82893	0.84179	1	3659	1	0.090174	0.090124	0.26084	1	894	2	0.090174
GPC6	6	0.69674	0.75554	1	3272	1	0.086311	0.090097	0.26084	1	893	3	0.086311
CPT1A	6	0.3333	0.49256	1	2187	1	0.068715	0.089715	0.26084	1	887	3	0.068715
SCN10A	6	0.37204	0.5127	1	2327	1	0.056974	0.08951	0.26084	1	886	2	0.056974
ERO1A	6	0.0010122	0.0044669	0.937005	22	4	-0.38545	0.090125	0.26084	1	895	1	-0.38545
UGT2B4	6	0.94926	0.95186	1	4174	0	0.11445	0.090227	0.26136	1	896	3	0.11445
ELAVL1	6	0.99798	0.99794	1	4380	0	0.16885	0.090488	0.26229	1	900	3	0.16885
KCNK15	6	0.14487	0.28603	1	1304	2	0.13123	0.090401	0.26229	1	899	3	0.13123
KCNJ3	6	0.98604	0.98528	1	4327	0	0.12954	0.091315	0.26229	1	908	3	0.12954
ADRB3	6	0.53457	0.68818	1	2930	1	0.129	0.091149	0.26229	1	907	2	0.129
GBA2	6	0.37324	0.51449	1	2333	1	0.11619	0.090964	0.26229	1	904	3	0.11619
LDHA	6	0.92596	0.92576	1	4079	0	0.10466	0.091066	0.26229	1	906	3	0.10466
HFE	6	0.96865	0.96801	1	4256	0	0.074887	0.09033	0.26229	1	897	2	0.074887
CR1	6	0.31287	0.47664	1	2112	1	0.067874	0.090964	0.26229	1	905	3	0.067874
GPR62	6	0.721	0.76459	1	3321	1	0.044861	0.090392	0.26229	1	898	3	0.044861
GRIK3	6	0.79947	0.79755	1	3546	1	0.030026	0.090729	0.26229	1	902	3	0.030026
DMBT1	6	0.34196	0.49373	1	2217	1	-0.016094	0.090535	0.26229	1	901	2	-0.016094
GSTM3	6	0.44653	0.58668	1	2625	2	-0.051198	0.091354	0.26229	1	909	2	-0.051198
IL21	6	0.47206	0.6298	1	2714	2	-0.074878	0.09074	0.26229	1	903	1	-0.074878
MSR1	6	0.023607	0.078527	1	305	2	-0.071929	0.091559	0.26281	1	910	1	-0.071929
TRPC3	6	0.84094	0.85201	1	3706	1	0.080831	0.091664	0.26282	1	911	3	0.080831
EPOR	6	0.88886	0.89715	1	3901	0	0.14968	0.092688	0.26335	1	919	3	0.14968
STK33	6	0.60619	0.71663	1	3057	1	0.14725	0.092453	0.26335	1	918	3	0.14725
PON3	6	0.68769	0.75554	1	3254	1	0.14641	0.091883	0.26335	1	912	3	0.14641
SLC6A1	6	0.946	0.94788	1	4159	0	0.1311	0.093196	0.26335	1	922	3	0.1311
IKBKE	6	0.76102	0.7782	1	3425	1	0.10828	0.092146	0.26335	1	914	3	0.10828
KCNJ4	6	0.28323	0.44674	1	1999	1	0.089477	0.093469	0.26335	1	923	2	0.089477
GRPR	6	0.38113	0.51835	1	2369	2	0.061859	0.092349	0.26335	1	916	3	0.061859
SCT	6	0.085194	0.2044	1	883	1	0.058691	0.093996	0.26335	1	925	3	0.058691
GLRA2	6	0.56739	0.70288	1	2978	1	0.028918	0.093604	0.26335	1	924	3	0.028918
RSPO2	6	0.25158	0.43199	1	1875	2	0.023338	0.092824	0.26335	1	920	2	0.023338
HABP2	6	0.29281	0.46348	1	2022	2	0.020719	0.092417	0.26335	1	917	3	0.020719
MANBA	6	0.8632	0.87118	1	3805	0	-0.028128	0.092173	0.26335	1	915	2	-0.028128
P2RY1	6	0.39911	0.53322	1	2442	2	-0.04033	0.092991	0.26335	1	921	1	-0.04033
DGCR6	6	0.47355	0.6298	1	2718	2	-0.11351	0.094013	0.26335	1	926	1	-0.11351
ADAMTS10	6	0.27931	0.44674	1	1980	2	-0.13144	0.091968	0.26335	1	913	1	-0.13144
CD1C	6	0.99573	0.99542	1	4368	0	0.16115	0.095954	0.26424	1	936	3	0.16115
CD5	6	0.90961	0.91331	1	4003	0	0.14339	0.096312	0.26424	1	940	3	0.14339
CBLN1	6	0.98922	0.98814	1	4340	0	0.11887	0.096492	0.26424	1	945	3	0.11887
TRGV3	6	0.75373	0.77704	1	3400	1	0.11714	0.095964	0.26424	1	937	3	0.11714
CCR6	6	0.67651	0.75156	1	3219	1	0.11705	0.095004	0.26424	1	931	3	0.11705
LTB4R2	6	0.41558	0.5509	1	2505	1	0.10457	0.096376	0.26424	1	941	3	0.10457
FREM3	6	0.12312	0.25805	1	1148	2	0.098739	0.096651	0.26424	1	946	3	0.098739
MTNR1B	6	0.67832	0.75215	1	3230	1	0.09474	0.096447	0.26424	1	943	3	0.09474
HTR3C	6	0.624	0.72559	1	3095	1	0.090792	0.096307	0.26424	1	939	2	0.090792
LRRC55	6	0.26498	0.43617	1	1932	1	0.081133	0.095999	0.26424	1	938	3	0.081133
PCSK5	6	0.35864	0.50049	1	2276	2	0.080222	0.096444	0.26424	1	942	3	0.080222
IGLV4-60	6	0.25223	0.43199	1	1878	2	0.072001	0.09475	0.26424	1	929	3	0.072001
GPR132	6	0.03701	0.11845	1	441	1	0.056439	0.095442	0.26424	1	933	1	0.056439
ABCB11	6	0.94575	0.94739	1	4158	0	0.040738	0.095758	0.26424	1	935	2	0.040738
DUT	6	0.69493	0.75554	1	3266	1	0.037176	0.095621	0.26424	1	934	2	0.037176
P4HTM	6	0.061044	0.1675	1	692	2	0.030363	0.094617	0.26424	1	928	3	0.030363
CDK18	6	0.47212	0.6298	1	2715	1	-0.023598	0.094217	0.26424	1	927	2	-0.023598
CST9L	6	0.86563	0.87546	1	3807	0	-0.072605	0.095141	0.26424	1	932	2	-0.072605
DDX3X	6	0.35637	0.50049	1	2265	2	-0.11095	0.096462	0.26424	1	944	1	-0.11095
SLC6A9	6	0.027525	0.08681	1	345	4	-0.17485	0.09483	0.26424	1	930	1	-0.17485
GLIPR1L1	6	0.44499	0.58668	1	2620	2	-0.002283	0.096869	0.26725	1	947	2	-0.002283
TMSB4X	2	0.77403	0.76697	1	3465	0	0.1025	0.22047	0.26807	1	1743	1	0.1025
COL6A3	6	0.9506	0.95236	1	4178	0	0.13365	0.098658	0.26873	1	958	3	0.13365
GPER1	6	0.66766	0.74512	1	3195	1	0.094588	0.097277	0.26873	1	948	3	0.094588
NGFR	6	0.81131	0.81349	1	3597	1	0.084259	0.097892	0.26873	1	955	3	0.084259
LACTB	6	0.83712	0.84639	1	3691	1	0.072212	0.097436	0.26873	1	949	3	0.072212
ADCYAP1	6	0.8008	0.79869	1	3549	1	0.071979	0.097823	0.26873	1	953	3	0.071979
OXT	6	0.84065	0.85089	1	3704	1	0.057252	0.097572	0.26873	1	951	3	0.057252
BOLA3	6	0.93383	0.93118	1	4116	0	0.05377	0.097684	0.26873	1	952	2	0.05377
PPM1B	6	0.40852	0.54512	1	2483	2	0.022057	0.098204	0.26873	1	956	3	0.022057
HSD17B1	6	0.37234	0.5127	1	2329	2	0.015615	0.097887	0.26873	1	954	1	0.015615
DBF4	6	0.063776	0.17033	1	723	2	-0.031214	0.098294	0.26873	1	957	2	-0.031214
NR1D2	6	0.24651	0.4269	1	1859	2	-0.043742	0.09748	0.26873	1	950	2	-0.043742
KDM1A	6	0.49564	0.6516	1	2798	1	0.12151	0.10007	0.26962	1	965	3	0.12151
PSMG3	6	0.88186	0.89163	1	3873	0	0.10078	0.10088	0.26962	1	969	3	0.10078
SLC5A7	6	0.51791	0.67404	1	2889	1	0.084421	0.099339	0.26962	1	960	3	0.084421
BPIFC	6	0.21678	0.3985	1	1752	2	0.083962	0.099567	0.26962	1	962	3	0.083962
SLC22A5	6	0.51196	0.66772	1	2859	1	0.078012	0.10011	0.26962	1	966	3	0.078012
LPO	6	0.0063045	0.025767	1	108	2	0.066818	0.099834	0.26962	1	964	3	0.066818
PHKG1	6	0.81488	0.81906	1	3607	1	0.052223	0.099515	0.26962	1	961	1	0.052223
ESR2	6	0.4405	0.58179	1	2603	2	0.036149	0.10033	0.26962	1	967	2	0.036149
SLC12A5	6	0.82827	0.84179	1	3655	1	0.032081	0.09907	0.26962	1	959	2	0.032081
DGAT1	6	0.058094	0.1658	1	669	2	-0.0066609	0.10053	0.26962	1	968	1	-0.0066609
FZD9	6	0.3362	0.49256	1	2196	2	-0.054844	0.099718	0.26962	1	963	1	-0.054844
GSTA5	6	0.6791	0.75215	1	3233	1	0.14635	0.10251	0.27312	1	978	3	0.14635
IMPG2	6	0.60095	0.71662	1	3040	1	0.10497	0.10204	0.27312	1	976	3	0.10497
MRGPRD	6	0.91101	0.91572	1	4012	0	0.10373	0.10175	0.27312	1	974	2	0.10373
TRPM4	6	0.57064	0.70399	1	2984	1	0.10294	0.10315	0.27312	1	983	3	0.10294
TNNI3	6	0.19657	0.37861	1	1643	3	0.08109	0.10292	0.27312	1	981	3	0.08109
MASTL	6	0.29392	0.46348	1	2027	2	0.062689	0.10163	0.27312	1	972	3	0.062689
SCG5	6	0.04287	0.13536	1	505	3	0.061701	0.10172	0.27312	1	973	3	0.061701
KRTDAP	6	0.87524	0.88067	1	3845	0	0.045134	0.10297	0.27312	1	982	3	0.045134
PTK7	6	0.95626	0.95703	1	4201	0	0.0372	0.10195	0.27312	1	975	2	0.0372
NR1I2	6	0.26107	0.43403	1	1915	2	0.03477	0.10256	0.27312	1	979	2	0.03477
JMJD7-PLA2G4B	6	0.39243	0.52975	1	2414	2	-0.012666	0.10317	0.27312	1	984	1	-0.012666
IL33	6	0.46821	0.62234	1	2700	2	-0.028946	0.10123	0.27312	1	971	2	-0.028946
KLHL20	6	0.0025479	0.008385	0.960602	46	4	-0.18938	0.10276	0.27312	1	980	1	-0.18938
MADCAM1	5	0.93733	0.93676	1	4126	0	0.12471	0.11229	0.27422	1	1048	2	0.12471
GYPC	6	0.83702	0.84639	1	3689	1	0.084207	0.10404	0.27647	1	987	3	0.084207
GUCA2A	6	0.15949	0.31868	1	1396	2	0.075678	0.10408	0.27647	1	988	3	0.075678
AKR1C1	6	0.32997	0.4904	1	2173	1	0.063629	0.10418	0.27647	1	990	2	0.063629
SAE1	6	0.20035	0.38362	1	1667	2	-0.093028	0.10398	0.27647	1	986	1	-0.093028
LRRN3	6	0.080293	0.1958	1	844	3	-0.10041	0.10377	0.27647	1	985	1	-0.10041
KCND1	6	0.44892	0.59214	1	2632	2	-0.10854	0.10411	0.27647	1	989	2	-0.10854
CGREF1	6	0.15645	0.31558	1	1376	2	0.14995	0.10469	0.27935	1	992	3	0.14995
IFNGR1	6	0.64019	0.73249	1	3123	1	0.08888	0.10503	0.27935	1	994	2	0.08888
CD48	6	0.6607	0.74281	1	3177	1	0.06606	0.10507	0.27935	1	995	3	0.06606
RPTN	6	0.94567	0.94739	1	4156	0	0.056136	0.10467	0.27935	1	991	2	0.056136
SCN1B	6	0.77799	0.78505	1	3477	1	-0.010022	0.10519	0.27935	1	996	1	-0.010022
ORM2	6	0.12559	0.25896	1	1172	2	-0.010377	0.10539	0.27935	1	997	2	-0.010377
TREM1	6	0.037393	0.11929	1	447	4	-0.10735	0.10496	0.27935	1	993	2	-0.10735
ESM1	6	0.84171	0.85201	1	3712	1	0.10867	0.10577	0.27991	1	998	3	0.10867
GHRL	6	0.96278	0.9621	1	4232	0	0.053385	0.10588	0.27991	1	999	2	0.053385
GAS6	4	0.91545	0.91206	1	4030	0	0.018885	0.14112	0.28045	1	1227	1	0.018885
TLL1	6	0.47486	0.63114	1	2723	2	0.15284	0.10645	0.28135	1	1002	3	0.15284
BMPER	6	0.27089	0.44159	1	1953	2	0.097161	0.10652	0.28135	1	1003	3	0.097161
CCR2	6	0.98181	0.97936	1	4308	0	0.06859	0.1063	0.28135	1	1000	2	0.06859
MAP3K12	6	0.36402	0.50641	1	2301	1	0.0578	0.10657	0.28135	1	1004	3	0.0578
PRH1	6	0.59441	0.71438	1	3031	1	-0.018852	0.10659	0.28135	1	1005	2	-0.018852
CELA1	6	0.21088	0.39267	1	1731	3	-0.088639	0.1064	0.28135	1	1001	2	-0.088639
CXCL17	6	0.0093893	0.033247	1	134	2	0.091978	0.10721	0.28191	1	1006	3	0.091978
SCN11A	6	0.68575	0.75322	1	3247	1	0.090855	0.10742	0.28191	1	1009	3	0.090855
CCR8	6	0.96946	0.96901	1	4261	0	0.015216	0.10741	0.28191	1	1008	2	0.015216
STKLD1	6	0.05026	0.15247	1	601	1	0.011502	0.10734	0.28191	1	1007	2	0.011502
CALU	6	0.75234	0.77704	1	3396	1	0.16285	0.10744	0.28192	1	1010	2	0.16285
TPH2	6	0.027247	0.086416	1	340	4	-0.17705	0.10761	0.28192	1	1011	1	-0.17705
CDKL2	5	0.047763	0.12161	1	568	2	-0.019315	0.11502	0.28229	1	1066	2	-0.019315
DAPK1	6	0.82089	0.83043	1	3627	1	0.16148	0.1078	0.28251	1	1013	3	0.16148
C17orf99	6	0.044653	0.13899	1	527	2	0.096383	0.10775	0.28251	1	1012	3	0.096383
UMPS	6	0.4522	0.5972	1	2649	2	0.036379	0.10816	0.28251	1	1015	3	0.036379
JAK1	6	0.63265	0.72787	1	3109	1	-0.042664	0.10802	0.28251	1	1014	1	-0.042664
SERPINB4	6	0.56701	0.70288	1	2976	1	0.096683	0.10823	0.28312	1	1017	2	0.096683
RGS12	6	0.099613	0.23097	1	985	3	-0.044943	0.10822	0.28312	1	1016	2	-0.044943
VCAN	6	0.91435	0.91803	1	4024	0	0.14687	0.10937	0.28371	1	1026	3	0.14687
AKT1S1	6	0.93397	0.93118	1	4117	0	0.10278	0.10899	0.28371	1	1021	3	0.10278
PDIK1L	6	0.86073	0.86679	1	3790	0	0.096587	0.10851	0.28371	1	1018	3	0.096587
SULT1A2	6	0.65853	0.74056	1	3172	1	0.095131	0.10913	0.28371	1	1023	3	0.095131
CNTN2	6	0.47459	0.63114	1	2719	1	0.043662	0.10963	0.28371	1	1028	2	0.043662
FMOD	6	0.085994	0.20917	1	887	2	0.029556	0.10875	0.28371	1	1019	3	0.029556
CHST11	6	0.030976	0.097591	1	381	1	-0.010107	0.10916	0.28371	1	1024	2	-0.010107
TMEM256-PLSCR3	6	0.098238	0.22877	1	975	2	-0.01151	0.10902	0.28371	1	1022	2	-0.01151
TRPC7	6	0.93818	0.93915	1	4129	0	-0.016491	0.10943	0.28371	1	1027	1	-0.016491
AMBN	6	0.19297	0.37479	1	1620	3	-0.06658	0.10923	0.28371	1	1025	2	-0.06658
MMP2	6	0.12883	0.26554	1	1193	3	-0.14705	0.10882	0.28371	1	1020	2	-0.14705
SDC4	6	0.012466	0.048487	1	163	2	0.072235	0.10985	0.28427	1	1030	3	0.072235
CACNA1F	6	0.48425	0.63882	1	2752	1	0.04856	0.1098	0.28427	1	1029	2	0.04856
GGT1	6	0.10215	0.23237	1	1006	2	-0.055592	0.11003	0.28427	1	1032	2	-0.055592
GABBR2	6	0.17215	0.34258	1	1475	2	-0.091617	0.10995	0.28427	1	1031	2	-0.091617
EGFR	6	0.10499	0.23546	1	1027	1	0.11015	0.11018	0.28428	1	1033	3	0.11015
VWF	6	0.26266	0.43513	1	1924	2	-0.053362	0.11023	0.28428	1	1034	1	-0.053362
OCLN	6	0.9788	0.97692	1	4294	0	0.096236	0.11074	0.28488	1	1036	2	0.096236
SERPINB9	6	0.037655	0.12014	1	448	3	-0.055645	0.11084	0.28488	1	1037	2	-0.055645
CD40LG	6	0.16426	0.3272	1	1418	3	-0.10714	0.11043	0.28488	1	1035	1	-0.10714
LATS1	6	0.31522	0.47773	1	2121	1	0.051072	0.11124	0.28545	1	1040	1	0.051072
C1QL1	6	0.78956	0.793	1	3509	1	0.020368	0.11104	0.28545	1	1038	1	0.020368
P2RY10	6	0.84156	0.85201	1	3710	1	-0.079085	0.1111	0.28545	1	1039	2	-0.079085
OXSR1	6	0.74597	0.77474	1	3380	1	0.11991	0.11305	0.28909	1	1054	3	0.11991
IL5RA	6	0.95941	0.95876	1	4215	0	0.11868	0.11444	0.28909	1	1062	3	0.11868
CD19	6	0.80831	0.81235	1	3581	1	0.10061	0.11293	0.28909	1	1053	3	0.10061
LAMA2	6	0.47563	0.63249	1	2726	1	0.091697	0.11218	0.28909	1	1046	3	0.091697
PRB4	6	0.81297	0.81681	1	3603	1	0.074852	0.11177	0.28909	1	1044	3	0.074852
SLAMF1	6	0.32004	0.47986	1	2134	2	0.072282	0.11425	0.28909	1	1058	2	0.072282
PRB2	6	0.82771	0.84179	1	3653	1	0.066555	0.11312	0.28909	1	1055	3	0.066555
COL7A1	6	0.30529	0.47178	1	2078	1	0.063916	0.11204	0.28909	1	1045	2	0.063916
MS4A1	6	0.039737	0.1313	1	471	2	0.057416	0.11459	0.28909	1	1063	3	0.057416
FUCA1	6	0.4504	0.59214	1	2641	1	0.056973	0.11291	0.28909	1	1052	2	0.056973
LYZL2	6	0.11114	0.24387	1	1067	2	0.034566	0.11415	0.28909	1	1057	3	0.034566
GRK3	6	0.10559	0.2363	1	1031	2	0.032668	0.11465	0.28909	1	1064	2	0.032668
HILPDA	6	0.36796	0.50816	1	2313	1	0.029313	0.11345	0.28909	1	1056	2	0.029313
PRKCH	6	0.44582	0.58668	1	2622	2	0.028055	0.11175	0.28909	1	1043	2	0.028055
GRIK2	6	0.30509	0.47079	1	2076	2	0.024583	0.11285	0.28909	1	1051	2	0.024583
EIF2AK1	6	0.12497	0.25895	1	1164	3	0.017418	0.11434	0.28909	1	1059	3	0.017418
TLR6	6	0.17417	0.34693	1	1488	3	0.0086881	0.1116	0.28909	1	1041	3	0.0086881
APOA2	6	0.048133	0.14926	1	573	3	-0.023136	0.11283	0.28909	1	1050	2	-0.023136
ILK	6	0.32367	0.47986	1	2154	2	-0.037917	0.11224	0.28909	1	1047	1	-0.037917
KCNF1	6	0.048907	0.15066	1	585	3	-0.038195	0.11233	0.28909	1	1049	2	-0.038195
OR4K15	6	0.19975	0.38361	1	1661	3	-0.047148	0.11443	0.28909	1	1061	2	-0.047148
FIBIN	6	0.063606	0.17033	1	722	3	-0.054991	0.11164	0.28909	1	1042	2	-0.054991
CHRNB2	6	0.042082	0.13471	1	491	4	-0.18923	0.11436	0.28909	1	1060	2	-0.18923
ABCB4	6	0.52248	0.68011	1	2903	1	0.088355	0.11498	0.28978	1	1065	3	0.088355
TUBB3	5	0.012688	0.044979	1	169	2	-0.085296	0.11668	0.28996	1	1073	1	-0.085296
HNMT	6	0.22775	0.4074	1	1800	2	0.062323	0.11531	0.29049	1	1067	2	0.062323
SLC22A31	6	0.83993	0.85089	1	3702	1	-0.046035	0.11545	0.29049	1	1068	2	-0.046035
MANF	6	0.11845	0.25036	1	1113	2	0.033211	0.11575	0.29144	1	1069	2	0.033211
NPPC	6	0.4793	0.63767	1	2740	2	0.092096	0.11596	0.29212	1	1071	3	0.092096
COL5A2	6	0.5942	0.71324	1	3030	1	0.0091262	0.11626	0.29212	1	1072	2	0.0091262
GPR37L1	6	0.0025287	0.0083207	0.960602	45	3	-0.18575	0.11585	0.29212	1	1070	1	-0.18575
VKORC1L1	6	0.1417	0.28166	1	1279	2	0.097744	0.11744	0.293	1	1079	3	0.097744
TNFRSF11A	6	0.49914	0.65535	1	2810	1	0.086541	0.11699	0.293	1	1076	2	0.086541
OR7G2	6	0.74533	0.77474	1	3377	1	0.030454	0.11725	0.293	1	1078	1	0.030454
AMPD3	6	0.22575	0.4044	1	1789	2	0.027244	0.11675	0.293	1	1074	3	0.027244
DEFB118	6	0.66873	0.74625	1	3198	1	0.0035861	0.11685	0.293	1	1075	1	0.0035861
TUBA1A	6	0.87676	0.88467	1	3850	0	-0.029246	0.11705	0.293	1	1077	1	-0.029246
GUCY1B3	6	0.016213	0.065425	1	216	3	-0.014623	0.11764	0.29387	1	1080	3	-0.014623
FCGR2A	6	0.98917	0.98814	1	4339	0	0.1994	0.11795	0.29478	1	1083	2	0.1994
SDC2	6	0.87761	0.88467	1	3855	0	0.11041	0.11803	0.29478	1	1084	3	0.11041
KALRN	6	0.64095	0.73361	1	3126	1	0.08797	0.11793	0.29478	1	1081	3	0.08797
PARP1	6	0.14565	0.28769	1	1309	2	0.087532	0.11835	0.29478	1	1087	3	0.087532
MAP4K5	6	0.026864	0.085947	1	337	1	0.031564	0.11795	0.29478	1	1082	2	0.031564
AEBP1	6	0.19644	0.37861	1	1642	3	-0.016861	0.11823	0.29478	1	1086	3	-0.016861
CD207	6	0.41558	0.5509	1	2506	2	-0.12532	0.11809	0.29478	1	1085	2	-0.12532
TMED1	6	0.35253	0.50049	1	2247	1	0.11737	0.11878	0.29479	1	1090	3	0.11737
GZMK	6	0.85165	0.86342	1	3757	1	0.055734	0.11868	0.29479	1	1089	2	0.055734
INHA	6	0.05164	0.15515	1	612	2	0.024309	0.11865	0.29479	1	1088	2	0.024309
NQO1	6	0.6746	0.75097	1	3212	1	0.19036	0.11947	0.29536	1	1092	3	0.19036
ADHFE1	6	0.51184	0.66772	1	2858	1	0.1156	0.11945	0.29536	1	1091	2	0.1156
NPBWR1	6	0.91948	0.9216	1	4043	0	0.054892	0.12005	0.29596	1	1094	1	0.054892
CTSZ	6	0.43231	0.56605	1	2570	2	0.020059	0.11997	0.29596	1	1093	3	0.020059
NEK6	6	0.40623	0.54102	1	2476	2	-0.00987	0.1203	0.29691	1	1095	2	-0.00987
UQCC3	6	0.16046	0.32044	1	1400	2	-0.056083	0.12045	0.29692	1	1096	2	-0.056083
SV2A	6	0.40722	0.54205	1	2478	2	0.17666	0.1206	0.29777	1	1097	2	0.17666
NR2E3	6	0.15898	0.31725	1	1392	2	0.08906	0.12084	0.29897	1	1098	2	0.08906
PSMA4	6	0.93132	0.92781	1	4105	0	0.065594	0.12124	0.29897	1	1099	2	0.065594
IFNA6	6	0.68668	0.75441	1	3251	1	0.11412	0.12183	0.29962	1	1103	3	0.11412
IFNA16	6	0.077548	0.18838	1	825	2	0.043813	0.12188	0.29962	1	1105	3	0.043813
THY1	6	0.50818	0.66401	1	2843	2	0.0371	0.12178	0.29962	1	1102	3	0.0371
SIDT2	6	0.94865	0.95091	1	4170	0	-0.004465	0.12164	0.29962	1	1101	2	-0.004465
CCL25	6	0.019767	0.069093	1	260	3	-0.044314	0.12186	0.29962	1	1104	2	-0.044314
OR4F4	4	0.67785	0.68575	1	3225	1	-0.065422	0.1584	0.30204	1	1346	1	-0.065422
HIST1H3I	6	0.065245	0.17148	1	731	2	0.028472	0.1229	0.30587	1	1106	2	0.028472
MAP2K7	6	0.12973	0.26918	1	1197	3	-0.086317	0.12303	0.30587	1	1107	1	-0.086317
SERPINA6	6	0.67746	0.75215	1	3223	1	0.038539	0.12335	0.30739	1	1108	2	0.038539
TIMP1	6	0.72639	0.76792	1	3332	1	0.12297	0.12344	0.3083	1	1109	3	0.12297
PIN1	5	0.97706	0.97472	1	4286	0	0.11229	0.12143	0.30851	1	1100	3	0.11229
SULT2B1	6	0.93638	0.93552	1	4122	0	0.23994	0.12432	0.30901	1	1116	3	0.23994
FGF22	6	0.057141	0.16084	1	662	2	0.040337	0.12423	0.30901	1	1115	2	0.040337
HCAR3	6	0.41245	0.55089	1	2497	1	0.033385	0.12383	0.30901	1	1113	2	0.033385
DEFB126	6	0.47887	0.6351	1	2735	2	0.018604	0.12363	0.30901	1	1111	3	0.018604
CD3G	6	0.20744	0.39152	1	1712	3	-0.020685	0.12403	0.30901	1	1114	1	-0.020685
HSPB1	6	0.38846	0.52692	1	2395	2	-0.031509	0.12357	0.30901	1	1110	2	-0.031509
BRD3	6	0.49023	0.64387	1	2781	2	-0.042102	0.12365	0.30901	1	1112	2	-0.042102
SULT1C2	6	0.94203	0.9426	1	4142	0	0.1163	0.12462	0.30964	1	1117	3	0.1163
IGF1R	6	0.81602	0.82361	1	3612	1	0.099658	0.12512	0.30964	1	1123	3	0.099658
CILP	6	0.13804	0.27638	1	1255	2	0.033274	0.12482	0.30964	1	1121	2	0.033274
KLK9	6	0.054057	0.15822	1	635	2	0.031734	0.12462	0.30964	1	1118	2	0.031734
LEAP2	6	0.25636	0.43199	1	1894	2	0.030858	0.12469	0.30964	1	1119	3	0.030858
TNFRSF10C	6	0.88711	0.89439	1	3893	0	0.0040084	0.12477	0.30964	1	1120	2	0.0040084
IRAK3	6	0.20182	0.38745	1	1677	1	-0.059097	0.12514	0.30964	1	1124	2	-0.059097
PRKCB	6	0.12944	0.26918	1	1196	3	-0.081931	0.12502	0.30964	1	1122	1	-0.081931
IL1RAP	6	0.96353	0.96321	1	4235	0	0.11813	0.12522	0.31054	1	1125	2	0.11813
CFHR5	6	0.020559	0.074513	1	268	1	0.047532	0.12537	0.31054	1	1127	2	0.047532
WDR1	6	0.059464	0.1658	1	677	2	0.034964	0.12532	0.31054	1	1126	3	0.034964
LILRA4	6	0.60481	0.71663	1	3052	1	0.12828	0.12799	0.31136	1	1147	3	0.12828
NR1H3	6	0.80583	0.81011	1	3564	1	0.12003	0.12712	0.31136	1	1142	3	0.12003
STIM2	6	0.93554	0.93428	1	4119	0	0.11353	0.12661	0.31136	1	1138	3	0.11353
KLK13	6	0.84698	0.85763	1	3733	1	0.10464	0.12649	0.31136	1	1137	3	0.10464
PAH	6	0.95397	0.9552	1	4193	0	0.10305	0.127	0.31136	1	1141	3	0.10305
CYP46A1	6	0.15302	0.30942	1	1355	2	0.10171	0.12696	0.31136	1	1140	3	0.10171
GALE	6	0.65149	0.73937	1	3153	1	0.096047	0.12609	0.31136	1	1133	3	0.096047
NR1H4	6	0.72977	0.77015	1	3339	1	0.089792	0.12754	0.31136	1	1144	3	0.089792
GABRA3	6	0.9966	0.9965	1	4374	0	0.08512	0.12634	0.31136	1	1135	3	0.08512
DEFB113	6	0.94652	0.94788	1	4162	0	0.071531	0.1274	0.31136	1	1143	2	0.071531
QPCT	6	0.64798	0.73937	1	3142	1	0.065203	0.12589	0.31136	1	1132	3	0.065203
KIR3DL3	6	0.79707	0.79641	1	3538	1	0.064554	0.12779	0.31136	1	1145	2	0.064554
NEK8	6	0.91608	0.91873	1	4031	0	0.060444	0.12567	0.31136	1	1128	2	0.060444
GPR18	6	0.26498	0.43617	1	1931	1	0.046902	0.12578	0.31136	1	1130	3	0.046902
TIE1	6	0.14077	0.27995	1	1272	2	0.015604	0.12581	0.31136	1	1131	2	0.015604
CLK2	6	0.20113	0.38553	1	1672	3	0.010795	0.12621	0.31136	1	1134	3	0.010795
INHBC	6	0.004066	0.014533	0.961768	78	3	-0.014787	0.12784	0.31136	1	1146	3	-0.014787
SCGB3A1	6	0.095151	0.22404	1	953	3	-0.025536	0.12574	0.31136	1	1129	2	-0.025536
REN	6	0.8773	0.88467	1	3852	0	-0.027601	0.12641	0.31136	1	1136	2	-0.027601
KCNJ14	6	0.05922	0.1658	1	674	3	-0.1919	0.12799	0.31136	1	1148	1	-0.1919
KLRD1	6	0.94873	0.95091	1	4172	0	0.1328	0.12861	0.31209	1	1150	3	0.1328
FGG	6	0.53033	0.68703	1	2925	1	0.11984	0.12936	0.31209	1	1156	3	0.11984
CLPSL2	6	0.12134	0.25449	1	1135	2	0.077572	0.12918	0.31209	1	1155	3	0.077572
HPGD	6	0.82929	0.84179	1	3661	1	0.064745	0.12966	0.31209	1	1158	3	0.064745
GUCY1B2	6	0.64283	0.73361	1	3131	1	0.058677	0.1289	0.31209	1	1152	2	0.058677
VGF	6	0.4328	0.56715	1	2575	1	0.050282	0.12938	0.31209	1	1157	3	0.050282
GPNMB	6	0.16186	0.32212	1	1407	2	0.031294	0.12898	0.31209	1	1154	2	0.031294
MINPP1	6	0.20878	0.39266	1	1722	1	0.026005	0.12892	0.31209	1	1153	3	0.026005
UGT2B10	6	0.56146	0.69952	1	2967	1	-0.00070064	0.12973	0.31209	1	1159	2	-0.00070064
CRISP3	6	0.33856	0.49256	1	2207	2	-0.047258	0.12878	0.31209	1	1151	2	-0.047258
BRD2	6	0.0088876	0.032092	1	131	4	-0.24137	0.12822	0.31209	1	1149	2	-0.24137
MUC5AC	5	0.82662	0.83469	1	3646	0	-0.009323	0.12676	0.31424	1	1139	1	-0.009323
ITGA3	6	0.043654	0.13665	1	518	1	0.094933	0.12997	0.31482	1	1161	3	0.094933
SCGB1D2	6	0.77773	0.78505	1	3475	1	0.041826	0.13001	0.31482	1	1162	3	0.041826
UTS2R	6	0.6892	0.75554	1	3259	1	0.12181	0.1308	0.31575	1	1169	3	0.12181
IGFBP3	6	0.73641	0.77125	1	3351	1	0.086924	0.13079	0.31575	1	1168	3	0.086924
HMGCR	6	0.8377	0.84753	1	3693	1	0.080674	0.13068	0.31575	1	1166	3	0.080674
MAP3K15	6	0.91507	0.91803	1	4027	0	0.075247	0.13073	0.31575	1	1167	3	0.075247
GPR15	6	0.17196	0.34172	1	1472	1	0.050898	0.13011	0.31575	1	1163	3	0.050898
APH1A	6	0.41841	0.55256	1	2513	1	-0.02269	0.13036	0.31575	1	1164	2	-0.02269
NELL2	6	0.0077884	0.030298	1	122	4	-0.2897	0.13056	0.31575	1	1165	1	-0.2897
ALDH3B2	6	0.5232	0.68011	1	2907	1	0.13918	0.13095	0.31636	1	1171	3	0.13918
NQO2	6	0.99049	0.9891	1	4346	0	0.053654	0.13087	0.31636	1	1170	2	0.053654
XIAP	6	0.16006	0.31949	1	1397	2	0.036739	0.13118	0.31636	1	1174	2	0.036739
CDH5	6	0.29458	0.46348	1	2030	1	0.014278	0.13115	0.31636	1	1173	1	0.014278
VASN	6	0.27107	0.44159	1	1954	2	-0.017906	0.13096	0.31636	1	1172	2	-0.017906
OPRPN	6	0.97253	0.9719	1	4266	0	0.10802	0.13141	0.31637	1	1176	3	0.10802
POLE	6	0.46804	0.62234	1	2699	2	0.09007	0.13131	0.31637	1	1175	3	0.09007
SLC1A2	6	0.80276	0.80328	1	3557	1	0.44278	0.13193	0.3173	1	1179	3	0.44278
CRISP2	6	0.56987	0.70399	1	2981	1	0.0648	0.13298	0.3173	1	1185	3	0.0648
VIM	6	0.086017	0.20917	1	889	2	0.043479	0.13183	0.3173	1	1178	3	0.043479
TG	6	0.94117	0.94151	1	4139	0	0.043018	0.13253	0.3173	1	1183	2	0.043018
PKN3	6	0.37219	0.5127	1	2328	1	0.033093	0.1322	0.3173	1	1182	3	0.033093
ADAMTS13	6	0.73428	0.77125	1	3349	1	-0.032455	0.13194	0.3173	1	1180	1	-0.032455
NSDHL	6	0.1848	0.36539	1	1558	3	-0.040627	0.13273	0.3173	1	1184	1	-0.040627
PHF8	6	0.41297	0.55089	1	2498	2	-0.055786	0.13155	0.3173	1	1177	1	-0.055786
AURKC	6	0.022955	0.077966	1	299	2	-0.063909	0.13214	0.3173	1	1181	1	-0.063909
IL9R	6	0.14623	0.29053	1	1313	2	0.042989	0.13377	0.31893	1	1186	3	0.042989
CACNG7	6	0.092058	0.22127	1	928	3	-0.06505	0.13391	0.31893	1	1187	2	-0.06505
FMO5	5	0.22155	0.35706	1	1775	2	0.012924	0.12991	0.31952	1	1160	1	0.012924
MAPKAPK5	6	0.30873	0.47283	1	2097	2	0.15012	0.13448	0.31961	1	1190	3	0.15012
SEZ6L2	6	0.049835	0.15247	1	598	1	0.12092	0.13493	0.31961	1	1194	3	0.12092
PRSS54	6	0.97395	0.9725	1	4272	0	0.11847	0.13456	0.31961	1	1193	3	0.11847
LEPR	6	0.85305	0.86564	1	3761	1	0.097893	0.13509	0.31961	1	1195	2	0.097893
ADAMTS4	6	0.23579	0.41153	1	1822	2	0.096629	0.1345	0.31961	1	1191	2	0.096629
COL4A1	6	0.12403	0.25895	1	1158	2	0.095032	0.13514	0.31961	1	1196	2	0.095032
IVNS1ABP	6	0.82832	0.84179	1	3656	1	0.093574	0.13448	0.31961	1	1189	3	0.093574
TMPRSS11D	6	0.17762	0.35577	1	1517	3	-0.029541	0.13431	0.31961	1	1188	2	-0.029541
SLC22A1	6	0.030896	0.097328	1	379	2	-0.031631	0.13529	0.31961	1	1197	1	-0.031631
CSNK1A1L	6	0.40272	0.53649	1	2465	2	-0.10356	0.13453	0.31961	1	1192	2	-0.10356
RTN3	6	0.36781	0.50816	1	2312	1	0.11138	0.13546	0.32035	1	1198	3	0.11138
MCOLN3	6	0.49213	0.64785	1	2789	2	0.066961	0.13548	0.32035	1	1199	1	0.066961
CLUL1	6	0.90698	0.91082	1	3988	0	-0.0094748	0.13568	0.32035	1	1200	2	-0.0094748
TXNDC12	6	0.034874	0.10857	1	419	2	0.14224	0.13596	0.32068	1	1201	3	0.14224
PLP1	6	0.66571	0.74512	1	3190	1	0.11827	0.13604	0.321	1	1203	3	0.11827
DHRS2	6	0.098023	0.22877	1	973	3	-0.031725	0.13599	0.321	1	1202	3	-0.031725
LIPA	6	0.99774	0.99767	1	4379	0	0.14146	0.13641	0.32365	1	1206	3	0.14146
PGA5	6	0.81591	0.82361	1	3611	1	0.12495	0.13622	0.32365	1	1204	2	0.12495
IL18R1	6	0.18956	0.37102	1	1596	3	-0.20529	0.13629	0.32365	1	1205	2	-0.20529
C1S	6	0.92604	0.92576	1	4080	0	0.1478	0.13892	0.32627	1	1216	3	0.1478
LRRC4	6	0.17717	0.35577	1	1512	2	0.11088	0.13891	0.32627	1	1215	2	0.11088
INS	6	0.66272	0.74281	1	3185	1	0.08791	0.13837	0.32627	1	1213	2	0.08791
PTHLH	6	0.7098	0.7611	1	3302	1	0.055011	0.13768	0.32627	1	1211	2	0.055011
ATP1B2	6	0.99056	0.9891	1	4347	0	0.053883	0.1376	0.32627	1	1209	2	0.053883
FREM1	6	0.60547	0.71663	1	3055	1	0.045656	0.13862	0.32627	1	1214	2	0.045656
CR2	6	0.80943	0.81349	1	3587	1	0.044582	0.13729	0.32627	1	1208	2	0.044582
TOP2A	6	0.45034	0.59214	1	2640	2	0.0077611	0.13804	0.32627	1	1212	3	0.0077611
TUB	6	0.20353	0.38845	1	1689	2	-0.055114	0.13764	0.32627	1	1210	1	-0.055114
RPN1	6	0.80859	0.81235	1	3583	1	-0.076976	0.13686	0.32627	1	1207	1	-0.076976
P4HA1	6	0.39388	0.52975	1	2420	2	0.089186	0.13908	0.32707	1	1217	3	0.089186
GPR161	6	0.071726	0.17775	1	778	2	0.0054356	0.13913	0.32707	1	1218	3	0.0054356
RCE1	6	0.93655	0.93552	1	4124	0	0.18984	0.13956	0.33071	1	1219	3	0.18984
CHRFAM7A	3	0.81636	0.81402	1	3614	0	0.033571	0.19553	0.3319	1	1594	1	0.033571
SIRPG	5	0.27976	0.40543	1	1983	2	0.021453	0.14322	0.3333	1	1241	1	0.021453
PROK2	6	0.068804	0.17596	1	757	1	0.036311	0.1398	0.33349	1	1220	3	0.036311
SOAT1	6	0.92402	0.92576	1	4067	0	0.15416	0.1402	0.3342	1	1221	3	0.15416
MMP20	6	0.49338	0.64909	1	2791	1	0.0093734	0.14026	0.3342	1	1222	3	0.0093734
C2	6	0.45361	0.59721	1	2656	2	0.035315	0.14038	0.33421	1	1223	3	0.035315
APOA1	6	0.89105	0.89987	1	3915	0	0.080778	0.14155	0.33487	1	1231	2	0.080778
EDN1	6	0.98505	0.98366	1	4324	0	0.065205	0.14132	0.33487	1	1229	2	0.065205
GRID1	6	0.14194	0.28166	1	1281	2	0.035181	0.14136	0.33487	1	1230	2	0.035181
CD52	6	0.69912	0.75554	1	3279	1	0.034223	0.14077	0.33487	1	1224	2	0.034223
FKBP11	6	0.37637	0.51552	1	2352	2	0.007911	0.14156	0.33487	1	1232	1	0.007911
DPP10	6	0.39559	0.53322	1	2428	2	0.0075623	0.14078	0.33487	1	1225	2	0.0075623
FN1	6	0.03615	0.1179	1	431	2	-0.045646	0.1417	0.33487	1	1233	2	-0.045646
GALNT2	6	0.020746	0.074515	1	271	3	-0.059928	0.14108	0.33487	1	1226	2	-0.059928
MINK1	6	0.11285	0.24581	1	1083	2	-0.069275	0.14117	0.33487	1	1228	1	-0.069275
PTGDS	6	0.90415	0.90917	1	3975	0	0.097403	0.14194	0.33755	1	1236	3	0.097403
TAS1R1	6	0.9498	0.95236	1	4177	0	0.073915	0.14178	0.33755	1	1234	2	0.073915
PAK2	6	0.21297	0.39459	1	1738	1	0.044783	0.14188	0.33755	1	1235	3	0.044783
ACKR4	4	0.67276	0.67367	1	3205	1	0.01766	0.19808	0.33837	1	1607	1	0.01766
GGT5	5	0.24714	0.37792	1	1861	2	0.0062969	0.14583	0.33859	1	1265	2	0.0062969
HIST2H3D	5	0.40197	0.55416	1	2461	2	-0.024507	0.14774	0.33859	1	1278	2	-0.024507
MLN	5	0.20659	0.34765	1	1708	1	-0.10804	0.15152	0.34015	1	1299	2	-0.10804
SPINK1	6	0.35283	0.50049	1	2249	1	0.099946	0.14233	0.34095	1	1238	3	0.099946
CILP2	6	0.48382	0.63882	1	2751	2	0.020037	0.14231	0.34095	1	1237	3	0.020037
MAPK10	5	0.12044	0.25912	1	1128	2	-0.15968	0.15297	0.34225	1	1308	1	-0.15968
CLCN4	6	0.4885	0.64261	1	2769	2	0.048154	0.14292	0.34246	1	1239	1	0.048154
IL17RE	6	0.90142	0.90917	1	3958	0	-0.081457	0.14295	0.34246	1	1240	2	-0.081457
DNAJB11	6	0.92715	0.92576	1	4085	0	0.12577	0.14334	0.34522	1	1242	3	0.12577
PI16	5	0.73903	0.73337	1	3358	1	0.12556	0.16266	0.34538	1	1374	2	0.12556
IL9	6	0.24821	0.42895	1	1864	2	-0.10171	0.1437	0.34658	1	1243	1	-0.10171
SLC9A3	6	0.035889	0.11221	1	429	4	-0.21589	0.14373	0.34658	1	1244	2	-0.21589
UTS2B	6	0.25592	0.43199	1	1892	1	0.12003	0.14404	0.34819	1	1245	3	0.12003
GPLD1	6	0.017066	0.066548	1	231	1	0.11794	0.14437	0.34819	1	1250	3	0.11794
JUN	6	0.31469	0.47773	1	2119	2	0.11613	0.14415	0.34819	1	1246	3	0.11613
GYPE	6	0.14953	0.29579	1	1333	1	0.10249	0.14428	0.34819	1	1248	3	0.10249
IFITM1	6	0.42686	0.56223	1	2547	2	0.094619	0.14448	0.34819	1	1251	3	0.094619
CRHR2	6	0.93883	0.94151	1	4131	0	0.052242	0.1442	0.34819	1	1247	2	0.052242
KBTBD8	6	0.077133	0.18838	1	821	1	0.0040586	0.14429	0.34819	1	1249	1	0.0040586
OPN4	6	0.089453	0.21866	1	910	2	0.11608	0.14459	0.34909	1	1252	3	0.11608
ABCC9	6	0.9873	0.98623	1	4329	0	0.11015	0.14604	0.34909	1	1268	3	0.11015
SGSH	6	0.88563	0.89438	1	3888	0	0.10727	0.14526	0.34909	1	1258	2	0.10727
CD274	6	0.87469	0.88067	1	3839	0	0.089111	0.14568	0.34909	1	1264	3	0.089111
SPOCK2	6	0.28425	0.45178	1	2006	2	0.078366	0.14689	0.34909	1	1273	3	0.078366
GRN	6	0.37325	0.51449	1	2334	2	0.075339	0.14484	0.34909	1	1255	3	0.075339
GLA	6	0.98279	0.98033	1	4311	0	0.072082	0.14468	0.34909	1	1253	2	0.072082
M6PR	6	0.070683	0.17596	1	773	1	0.06163	0.14553	0.34909	1	1262	2	0.06163
EPHA1	6	0.67303	0.74864	1	3207	1	0.059876	0.14631	0.34909	1	1271	2	0.059876
ATRN	6	0.88253	0.89163	1	3878	0	0.048793	0.14487	0.34909	1	1256	2	0.048793
GPR34	6	0.35499	0.50049	1	2259	1	0.037996	0.14585	0.34909	1	1266	3	0.037996
LIPJ	6	0.010269	0.035049	1	144	2	0.037343	0.14507	0.34909	1	1257	3	0.037343
MMP24	6	0.269	0.43727	1	1949	1	0.026957	0.14643	0.34909	1	1272	2	0.026957
AVPR1A	6	0.036063	0.11757	1	430	3	0.0030353	0.14617	0.34909	1	1269	3	0.0030353
FGL1	6	0.72917	0.77015	1	3337	1	0.00050395	0.146	0.34909	1	1267	2	0.00050395
STK25	6	0.76115	0.7782	1	3426	1	-0.01217	0.14701	0.34909	1	1274	2	-0.01217
GZMM	6	0.62016	0.72559	1	3084	1	-0.014355	0.14565	0.34909	1	1263	1	-0.014355
SLC6A12	6	0.10629	0.23695	1	1032	3	-0.04529	0.14537	0.34909	1	1259	2	-0.04529
IGFBP6	6	0.49446	0.64909	1	2795	2	-0.055741	0.14475	0.34909	1	1254	2	-0.055741
WNT2B	6	0.10214	0.23237	1	1004	3	-0.083062	0.14545	0.34909	1	1260	2	-0.083062
IL22	6	0.033335	0.10646	1	404	4	-0.13365	0.14546	0.34909	1	1261	2	-0.13365
FKTN	6	0.050834	0.15296	1	607	4	-0.138	0.14623	0.34909	1	1270	1	-0.138
MBTPS1	6	0.90506	0.90999	1	3980	0	0.10642	0.14733	0.35	1	1276	3	0.10642
IDO1	6	0.015071	0.059539	1	202	3	-0.011053	0.14749	0.35	1	1277	3	-0.011053
TBXAS1	6	0.39923	0.53426	1	2443	2	-0.056914	0.14718	0.35	1	1275	2	-0.056914
COL17A1	6	0.99059	0.9891	1	4348	0	0.084352	0.14774	0.35001	1	1279	3	0.084352
SLC3A2	6	0.022737	0.077078	1	295	1	0.074758	0.14774	0.35001	1	1280	3	0.074758
LAMC1	6	0.066293	0.17334	1	739	2	0.047167	0.14798	0.35001	1	1281	1	0.047167
GREM2	6	0.88442	0.89347	1	3881	0	0.086945	0.14843	0.3507	1	1282	3	0.086945
IFI30	6	0.090863	0.22127	1	922	2	-0.013991	0.14875	0.35143	1	1283	2	-0.013991
SCN5A	6	0.66527	0.74512	1	3188	1	0.084832	0.14914	0.35144	1	1284	2	0.084832
FOLR1	6	0.014467	0.058136	1	195	3	-0.16388	0.14915	0.35144	1	1285	1	-0.16388
GPX5	6	0.11487	0.24581	1	1096	2	0.08783	0.14985	0.35217	1	1287	2	0.08783
CDK5R1	6	0.15937	0.31794	1	1395	1	0.019464	0.14973	0.35217	1	1286	2	0.019464
DPP7	5	0.89529	0.8909	1	3933	0	0.058002	0.17079	0.35278	1	1428	1	0.058002
GPR39	6	0.23629	0.41153	1	1824	1	0.16334	0.15089	0.35293	1	1293	3	0.16334
COMT	6	0.95694	0.95788	1	4206	0	0.1209	0.15037	0.35293	1	1289	3	0.1209
ALDH1A2	6	0.51787	0.67404	1	2888	2	0.040889	0.15076	0.35293	1	1291	2	0.040889
FGF4	6	0.10694	0.23785	1	1039	2	0.035232	0.15031	0.35293	1	1288	1	0.035232
TESK1	6	0.82663	0.84059	1	3647	1	0.012026	0.15076	0.35293	1	1290	2	0.012026
TUBB1	6	0.90241	0.90917	1	3965	0	0.011027	0.15076	0.35293	1	1292	2	0.011027
STK35	6	0.32934	0.48853	1	2171	1	0.115	0.1512	0.35549	1	1294	3	0.115
PLA2G4B	6	0.20274	0.38845	1	1684	2	0.031119	0.15131	0.35549	1	1297	3	0.031119
CD6	6	0.003482	0.012485	0.960602	67	3	-0.063529	0.15125	0.35549	1	1295	3	-0.063529
CST3	6	0.0041723	0.014822	0.961768	81	5	-0.33827	0.15128	0.35549	1	1296	1	-0.33827
EFNA5	6	0.18205	0.36352	1	1539	3	-0.063025	0.15166	0.35637	1	1300	1	-0.063025
ARSG	6	0.0078054	0.0303	1	123	3	-0.087472	0.15207	0.35637	1	1303	2	-0.087472
ITGA2	6	0.13345	0.27353	1	1223	3	-0.092306	0.15186	0.35637	1	1302	1	-0.092306
BRAF	6	0.014122	0.052396	1	192	3	-0.15546	0.15147	0.35637	1	1298	2	-0.15546
NGF	6	0.010412	0.035736	1	145	4	-0.23958	0.15167	0.35637	1	1301	2	-0.23958
FMO3	6	0.30366	0.46884	1	2068	1	0.042684	0.15259	0.35725	1	1306	3	0.042684
AMD1	6	0.49528	0.65035	1	2797	2	0.031733	0.15244	0.35725	1	1305	2	0.031733
SHH	6	0.065455	0.17211	1	734	3	-0.026137	0.15224	0.35725	1	1304	1	-0.026137
CRHR1	6	0.15841	0.31631	1	1387	1	-0.060342	0.15263	0.35725	1	1307	1	-0.060342
GPRC6A	6	0.43676	0.57525	1	2593	2	0.15038	0.15382	0.3581	1	1318	3	0.15038
CPXM1	6	0.035074	0.10884	1	422	2	0.148	0.15326	0.3581	1	1311	3	0.148
FGF3	6	0.24203	0.41981	1	1846	2	0.1457	0.15346	0.3581	1	1314	2	0.1457
MVD	6	0.9737	0.97249	1	4270	0	0.13369	0.15377	0.3581	1	1317	3	0.13369
RET	6	0.034644	0.10857	1	417	1	0.074433	0.15318	0.3581	1	1309	3	0.074433
OLFM3	6	0.061675	0.168	1	697	2	0.073107	0.15346	0.3581	1	1313	2	0.073107
MGAM2	6	0.024956	0.081783	1	318	3	0.027074	0.15371	0.3581	1	1316	3	0.027074
PDPK1	6	0.048838	0.15066	1	583	2	0.0059879	0.15321	0.3581	1	1310	2	0.0059879
MAN1B1	6	0.34501	0.49484	1	2230	2	-0.021066	0.15359	0.3581	1	1315	1	-0.021066
OR10P1	6	0.049502	0.15158	1	591	3	-0.17778	0.15334	0.3581	1	1312	2	-0.17778
CRB1	6	0.91172	0.91572	1	4014	0	0.10188	0.15461	0.35893	1	1323	3	0.10188
NOV	6	0.90874	0.91249	1	3997	0	0.03072	0.15437	0.35893	1	1320	1	0.03072
ADAM9	6	0.83707	0.84639	1	3690	1	0.024449	0.15417	0.35893	1	1319	2	0.024449
TNFRSF10B	6	0.17932	0.35819	1	1526	1	0.016514	0.15437	0.35893	1	1321	2	0.016514
NYX	6	0.032488	0.10568	1	394	3	-0.041075	0.15453	0.35893	1	1322	2	-0.041075
KCNA3	5	0.48904	0.61543	1	2775	1	-0.0011733	0.17604	0.35933	1	1462	2	-0.0011733
CASP6	6	0.64	0.73131	1	3122	1	0.086269	0.15523	0.36224	1	1324	3	0.086269
KCNMA1	6	0.93689	0.93612	1	4125	0	0.029036	0.15525	0.36224	1	1325	3	0.029036
CHRD	6	0.97899	0.97692	1	4295	0	0.10779	0.15675	0.36291	1	1334	3	0.10779
CYP3A5	6	0.37549	0.51449	1	2348	1	0.09683	0.1563	0.36291	1	1329	3	0.09683
CDC25A	6	0.46387	0.6162	1	2686	1	0.088367	0.15534	0.36291	1	1326	3	0.088367
CAPZA1	6	0.89723	0.90329	1	3941	0	0.082921	0.15613	0.36291	1	1327	3	0.082921
INHBA	6	0.47189	0.6298	1	2713	2	0.064576	0.15637	0.36291	1	1330	2	0.064576
SOSTDC1	6	0.59681	0.71547	1	3033	1	0.04505	0.15649	0.36291	1	1331	2	0.04505
CD276	6	0.87987	0.88781	1	3869	0	0.043757	0.15621	0.36291	1	1328	2	0.043757
OXTR	6	0.13352	0.27353	1	1224	2	-0.016873	0.15653	0.36291	1	1332	2	-0.016873
LSS	6	0.50793	0.66401	1	2842	2	-0.11198	0.15668	0.36291	1	1333	1	-0.11198
ALPL	6	0.98465	0.98325	1	4322	0	0.12222	0.15725	0.36292	1	1340	3	0.12222
LCK	6	0.98853	0.98753	1	4336	0	0.117	0.15794	0.36292	1	1342	3	0.117
CSNK2A1	6	0.24791	0.42895	1	1863	2	0.10104	0.15686	0.36292	1	1336	3	0.10104
LILRA6	6	0.89802	0.9033	1	3946	0	0.068255	0.15811	0.36292	1	1344	3	0.068255
NPS	6	0.17338	0.34693	1	1482	2	0.056877	0.15701	0.36292	1	1338	2	0.056877
PIGF	6	0.5762	0.70511	1	2995	1	0.049055	0.15685	0.36292	1	1335	2	0.049055
CD80	6	0.76496	0.7805	1	3441	1	0.038845	0.15706	0.36292	1	1339	1	0.038845
PDCD4	6	0.011444	0.047379	1	154	3	-0.048663	0.15698	0.36292	1	1337	3	-0.048663
IGFBP2	6	0.099522	0.23097	1	984	3	-0.09866	0.15822	0.36292	1	1345	1	-0.09866
SERPINF2	6	0.04228	0.13536	1	493	3	-0.10178	0.15797	0.36292	1	1343	2	-0.10178
GABRB3	6	0.025818	0.08375	1	327	3	-0.1479	0.15741	0.36292	1	1341	2	-0.1479
CNGA3	6	0.23457	0.40937	1	1818	2	0.079531	0.15891	0.36382	1	1351	3	0.079531
CHI3L1	6	0.9419	0.9426	1	4141	0	0.045862	0.1586	0.36382	1	1349	2	0.045862
TFF2	6	0.237	0.41249	1	1826	2	0.0046772	0.15841	0.36382	1	1347	2	0.0046772
TGM1	6	0.79143	0.793	1	3517	1	-0.01405	0.15879	0.36382	1	1350	1	-0.01405
CCNT1	6	0.067968	0.17532	1	751	3	-0.016056	0.15853	0.36382	1	1348	2	-0.016056
GRK6	6	0.37868	0.51552	1	2361	2	-0.063634	0.15898	0.36548	1	1352	1	-0.063634
SULT2A1	6	0.12562	0.25896	1	1173	1	0.092059	0.15976	0.36637	1	1356	3	0.092059
OVCH2	6	0.21751	0.3985	1	1757	2	0.072611	0.15999	0.36637	1	1357	3	0.072611
CXCR5	6	0.18457	0.36539	1	1556	1	0.0058677	0.15957	0.36637	1	1355	2	0.0058677
ABCC8	6	0.89914	0.90585	1	3951	0	-0.0050915	0.15937	0.36637	1	1354	2	-0.0050915
PRKCZ	6	0.14623	0.29053	1	1312	3	-0.0059071	0.15918	0.36637	1	1353	2	-0.0059071
MAP2K6	6	0.16844	0.33549	1	1450	1	0.12815	0.16062	0.36724	1	1359	3	0.12815
CASR	6	0.81871	0.83043	1	3620	1	0.095778	0.16022	0.36724	1	1358	2	0.095778
CREG1	6	0.44627	0.58668	1	2623	2	0.068213	0.16079	0.36808	1	1360	3	0.068213
NAGLU	6	0.067472	0.17531	1	748	3	-0.050452	0.16109	0.36808	1	1362	2	-0.050452
IGLV1-51	6	0.063506	0.16965	1	721	2	-0.11156	0.1609	0.36808	1	1361	1	-0.11156
ITGA10	6	0.9929	0.99226	1	4357	0	0.12831	0.16142	0.36809	1	1363	3	0.12831
TSPEAR	6	0.76323	0.77936	1	3432	1	0.099043	0.16159	0.36809	1	1365	3	0.099043
CA6	6	0.74984	0.77586	1	3387	1	0.092236	0.16148	0.36809	1	1364	3	0.092236
GRM4	6	0.69838	0.75554	1	3278	1	0.075547	0.16176	0.36809	1	1368	3	0.075547
SARAF	6	0.20908	0.39266	1	1724	2	0.063059	0.1617	0.36809	1	1367	3	0.063059
WISP3	6	0.26076	0.43403	1	1912	2	-0.089497	0.16167	0.36809	1	1366	1	-0.089497
HPX	6	0.61438	0.72013	1	3076	1	0.079356	0.16222	0.36881	1	1370	3	0.079356
PRKD2	6	0.6071	0.71663	1	3062	1	0.044504	0.16239	0.36881	1	1371	3	0.044504
THNSL2	6	0.7454	0.77474	1	3378	1	0.025382	0.16247	0.36881	1	1373	2	0.025382
OR8H3	6	0.3985	0.53322	1	2439	1	0.0063389	0.16205	0.36881	1	1369	1	0.0063389
SERPINB13	6	0.017258	0.067298	1	234	4	-0.1623	0.16243	0.36881	1	1372	1	-0.1623
ABCC10	6	0.98413	0.98218	1	4319	0	0.067982	0.16282	0.36954	1	1375	2	0.067982
PSENEN	6	0.91784	0.92019	1	4037	0	0.11711	0.16297	0.37022	1	1377	3	0.11711
CDK5	6	0.70558	0.75998	1	3294	1	0.096264	0.16288	0.37022	1	1376	3	0.096264
ANTXR2	6	0.93337	0.92979	1	4113	0	0.079595	0.16383	0.37022	1	1383	3	0.079595
ALDH1A1	6	0.023172	0.077968	1	301	2	0.061491	0.16331	0.37022	1	1379	3	0.061491
ITM2B	6	0.47498	0.63114	1	2724	1	0.060864	0.16377	0.37022	1	1381	2	0.060864
RESP18	6	0.36387	0.50641	1	2299	1	0.040298	0.16312	0.37022	1	1378	2	0.040298
DMKN	6	0.022828	0.077078	1	297	2	-0.06261	0.16377	0.37022	1	1382	2	-0.06261
TLR8	6	0.47721	0.6351	1	2730	2	-0.068134	0.16358	0.37022	1	1380	1	-0.068134
STK17A	6	0.48438	0.63882	1	2754	1	0.12118	0.16412	0.37207	1	1386	3	0.12118
SLC7A7	6	0.68693	0.75441	1	3252	1	0.023147	0.164	0.37207	1	1384	3	0.023147
CFHR2	6	0.13285	0.27217	1	1219	2	-0.084148	0.16409	0.37207	1	1385	2	-0.084148
CALCR	6	0.83969	0.85089	1	3701	1	-0.010406	0.16454	0.37276	1	1387	2	-0.010406
PNOC	6	0.51423	0.67023	1	2871	2	0.0050449	0.16473	0.37369	1	1388	2	0.0050449
GPR83	6	0.91891	0.92085	1	4039	0	0.0014854	0.16482	0.37369	1	1389	2	0.0014854
C6orf120	6	0.29723	0.46348	1	2046	1	0.10706	0.16522	0.37436	1	1393	3	0.10706
GALNS	6	0.913	0.91645	1	4020	0	0.0887	0.16493	0.37436	1	1391	3	0.0887
TDP1	6	0.83051	0.84179	1	3664	1	0.061543	0.16545	0.37436	1	1395	3	0.061543
CISD1	6	0.083399	0.19792	1	871	2	-0.065428	0.16506	0.37436	1	1392	2	-0.065428
CDC42BPG	6	0.042371	0.13536	1	495	2	-0.074455	0.1653	0.37436	1	1394	1	-0.074455
KCNH8	6	0.0044011	0.015791	0.974202	86	4	-0.21406	0.16492	0.37436	1	1390	1	-0.21406
SPAM1	6	0.56045	0.69952	1	2963	1	0.13252	0.16562	0.37437	1	1398	3	0.13252
ALDH3A2	6	0.66137	0.74281	1	3181	1	0.10398	0.16568	0.37437	1	1399	3	0.10398
ADM	6	0.96844	0.96763	1	4255	0	0.096712	0.16591	0.37437	1	1401	3	0.096712
SLC24A1	6	0.16336	0.3255	1	1415	2	0.0038093	0.16568	0.37437	1	1400	2	0.0038093
EGFL8	6	0.10012	0.23162	1	987	2	-0.035275	0.16547	0.37437	1	1396	2	-0.035275
ALDH4A1	6	0.46611	0.61876	1	2691	2	0.031019	0.16625	0.37511	1	1403	2	0.031019
FKBP7	6	0.12655	0.25896	1	1178	3	-0.082192	0.16606	0.37511	1	1402	2	-0.082192
AGR3	6	0.82273	0.83495	1	3632	1	0.016547	0.16652	0.37601	1	1405	2	0.016547
CYP4Z1	6	0.10207	0.23237	1	1003	2	-0.0049226	0.16644	0.37601	1	1404	3	-0.0049226
PTGDR2	5	0.8725	0.87538	1	3830	0	0.16782	0.19236	0.37785	1	1570	2	0.16782
GPR50	6	0.34928	0.49769	1	2239	1	0.13561	0.16701	0.37854	1	1406	3	0.13561
BRCA1	6	0.17271	0.34507	1	1480	1	0.049241	0.16774	0.37854	1	1409	2	0.049241
OGN	6	0.28876	0.45783	1	2014	1	0.045287	0.16702	0.37854	1	1407	2	0.045287
PRKAB1	6	0.12213	0.25747	1	1140	3	-0.01864	0.16797	0.37854	1	1410	2	-0.01864
CFP	6	0.3253	0.48167	1	2158	2	-0.079425	0.1675	0.37854	1	1408	2	-0.079425
OLFM4	6	0.08135	0.19642	1	853	2	-0.082566	0.16816	0.37854	1	1411	1	-0.082566
SI	6	0.010929	0.042376	1	150	2	0.12148	0.16897	0.37926	1	1418	2	0.12148
GPM6A	6	0.22183	0.40234	1	1777	1	0.11864	0.16882	0.37926	1	1416	3	0.11864
LTK	6	0.9669	0.9662	1	4249	0	0.10691	0.16905	0.37926	1	1419	3	0.10691
WNT16	6	0.94811	0.94986	1	4167	0	0.10007	0.16859	0.37926	1	1414	3	0.10007
GRIN2B	6	0.20472	0.39047	1	1698	2	0.09486	0.16946	0.37926	1	1422	3	0.09486
CCL13	6	0.034428	0.10829	1	416	1	0.082795	0.16835	0.37926	1	1412	3	0.082795
SCN3B	6	0.47547	0.63249	1	2725	2	0.059984	0.16864	0.37926	1	1415	3	0.059984
AGT	6	0.75811	0.7782	1	3416	1	0.02837	0.16913	0.37926	1	1420	2	0.02837
IHH	6	0.49127	0.64785	1	2784	2	0.028043	0.16854	0.37926	1	1413	1	0.028043
KLK7	6	0.39731	0.53322	1	2434	2	0.02404	0.16888	0.37926	1	1417	3	0.02404
ADAMTS7	6	0.065423	0.17211	1	733	3	-0.16209	0.16921	0.37926	1	1421	2	-0.16209
PPIL2	6	0.41883	0.55365	1	2514	1	0.033757	0.16976	0.37927	1	1424	3	0.033757
PCSK1	6	0.41324	0.55089	1	2499	2	0.024994	0.17011	0.37927	1	1426	3	0.024994
SLC44A1	6	0.76516	0.7805	1	3442	1	0.022751	0.1706	0.37927	1	1427	2	0.022751
PRKAA1	6	0.079672	0.19516	1	840	2	-0.021633	0.16978	0.37927	1	1425	2	-0.021633
RSPO4	6	0.22976	0.40842	1	1806	2	-0.035221	0.16968	0.37927	1	1423	1	-0.035221
TRIO	5	0.88951	0.88746	1	3903	0	0.054507	0.19438	0.3795	1	1586	2	0.054507
PTH2	6	0.75818	0.7782	1	3417	1	0.04042	0.17082	0.38018	1	1430	1	0.04042
OMD	6	0.35818	0.50049	1	2274	2	0.023626	0.17101	0.38018	1	1431	2	0.023626
SLC6A15	6	0.043644	0.13665	1	517	3	-0.06553	0.17081	0.38018	1	1429	3	-0.06553
CLCNKA	5	0.11465	0.24751	1	1094	2	0.0088948	0.19866	0.38204	1	1610	2	0.0088948
CALM2	5	0.71476	0.71739	1	3311	1	0.081751	0.20476	0.38286	1	1654	2	0.081751
PIK3CG	6	0.88486	0.89347	1	3883	0	0.1182	0.17142	0.38327	1	1432	3	0.1182
ST6GAL1	6	0.028941	0.095306	1	360	2	-0.030583	0.17177	0.38327	1	1433	2	-0.030583
P2RY6	6	0.21496	0.3967	1	1748	2	-0.050991	0.17191	0.38327	1	1435	2	-0.050991
CATSPER2	6	0.28596	0.45486	1	2008	2	-0.10801	0.17183	0.38327	1	1434	2	-0.10801
APP	6	0.068386	0.17532	1	754	2	0.20383	0.17248	0.38568	1	1439	3	0.20383
GPC3	6	0.89477	0.90161	1	3931	0	0.14177	0.17297	0.38568	1	1443	2	0.14177
UGT2B7	6	0.38801	0.52692	1	2391	2	0.12212	0.17399	0.38568	1	1452	3	0.12212
IGHE	6	0.90355	0.90917	1	3969	0	0.11662	0.17352	0.38568	1	1448	3	0.11662
CMKLR1	6	0.98654	0.98606	1	4328	0	0.10125	0.17347	0.38568	1	1447	2	0.10125
MMP21	6	0.47991	0.63767	1	2741	2	0.085925	0.17246	0.38568	1	1438	3	0.085925
EMILIN3	6	0.87091	0.87861	1	3826	0	0.076986	0.17458	0.38568	1	1456	3	0.076986
S1PR4	6	0.24983	0.43092	1	1868	1	0.068313	0.1737	0.38568	1	1450	3	0.068313
CD7	6	0.89508	0.90161	1	3932	0	0.06426	0.17281	0.38568	1	1441	3	0.06426
HIPK2	6	0.06763	0.17531	1	749	2	0.04008	0.17482	0.38568	1	1458	3	0.04008
NTS	6	0.28959	0.45783	1	2016	2	0.021108	0.17404	0.38568	1	1453	2	0.021108
LPAR6	6	0.43721	0.57641	1	2595	2	0.011886	0.17338	0.38568	1	1446	2	0.011886
IL31	6	0.40002	0.53427	1	2449	2	-0.0052988	0.17423	0.38568	1	1454	3	-0.0052988
LYG2	6	0.19108	0.3729	1	1609	2	-0.0068585	0.17314	0.38568	1	1444	2	-0.0068585
KCNC2	6	0.29525	0.46348	1	2034	2	-0.011127	0.17234	0.38568	1	1436	2	-0.011127
FABP2	6	0.70001	0.75554	1	3283	1	-0.027143	0.17366	0.38568	1	1449	2	-0.027143
ADORA1	6	0.14351	0.28233	1	1293	2	-0.038795	0.17461	0.38568	1	1457	2	-0.038795
HSD17B11	6	0.13451	0.27445	1	1231	3	-0.044718	0.1724	0.38568	1	1437	2	-0.044718
STYK1	6	0.12461	0.25895	1	1162	3	-0.073048	0.17271	0.38568	1	1440	1	-0.073048
PLBD1	6	0.14361	0.28233	1	1295	3	-0.074213	0.17385	0.38568	1	1451	2	-0.074213
TPSD1	6	0.13199	0.27147	1	1212	3	-0.076179	0.1729	0.38568	1	1442	2	-0.076179
CLEC11A	6	0.097121	0.22877	1	966	3	-0.11848	0.17328	0.38568	1	1445	1	-0.11848
KSR1	6	0.001169	0.004831	0.937005	24	5	-0.22559	0.17442	0.38568	1	1455	1	-0.22559
CD47	5	0.40539	0.55937	1	2472	2	-0.017991	0.20556	0.38574	1	1662	2	-0.017991
EDNRA	6	0.18052	0.35964	1	1531	3	-0.066497	0.17511	0.38661	1	1459	2	-0.066497
IL10RA	5	0.1124	0.24551	1	1080	1	0.03759	0.20823	0.38799	1	1678	2	0.03759
CCL21	6	0.33793	0.49256	1	2203	2	0.071492	0.17536	0.38809	1	1460	1	0.071492
ABCG2	6	0.54927	0.69616	1	2946	1	0.10724	0.17651	0.38965	1	1465	3	0.10724
AGA	6	0.2528	0.43199	1	1881	1	0.097016	0.17565	0.38965	1	1461	3	0.097016
MST1R	6	0.39767	0.53322	1	2438	2	0.059301	0.17625	0.38965	1	1464	3	0.059301
FKBP10	6	0.22721	0.4074	1	1795	2	0.02268	0.17668	0.38965	1	1467	2	0.02268
MAP2K3	6	0.12423	0.25895	1	1159	1	0.0094967	0.17607	0.38965	1	1463	3	0.0094967
CNGA4	6	0.054208	0.15872	1	637	3	-0.13649	0.17659	0.38965	1	1466	2	-0.13649
DPYD	6	0.90212	0.90917	1	3964	0	0.084956	0.1772	0.38966	1	1470	3	0.084956
CYP3A43	6	0.39974	0.53426	1	2446	2	0.066241	0.17768	0.38966	1	1471	3	0.066241
TWSG1	6	0.57955	0.70734	1	3001	1	0.058088	0.17775	0.38966	1	1472	3	0.058088
CYSLTR1	6	0.024259	0.079755	1	309	2	0.040266	0.17687	0.38966	1	1468	1	0.040266
FPR3	6	0.17322	0.34693	1	1481	3	0.034268	0.17708	0.38966	1	1469	3	0.034268
P2RY4	6	0.11276	0.24581	1	1082	2	0.060083	0.17866	0.39052	1	1475	2	0.060083
IGHG1	6	0.1268	0.25993	1	1180	3	-0.071381	0.17819	0.39052	1	1473	1	-0.071381
C1QTNF9	6	0.18961	0.37191	1	1600	2	-0.075753	0.17876	0.39052	1	1476	2	-0.075753
CCR1	6	0.38167	0.51937	1	2371	2	-0.11664	0.17838	0.39052	1	1474	2	-0.11664
KBTBD7	6	0.80702	0.81235	1	3568	1	0.10522	0.17959	0.39053	1	1480	3	0.10522
PTGER1	6	0.93761	0.93733	1	4128	0	0.042275	0.17915	0.39053	1	1477	2	0.042275
GPR32	6	0.3862	0.52691	1	2384	1	0.029624	0.17957	0.39053	1	1479	3	0.029624
CAMK1G	6	0.078584	0.19395	1	833	2	-0.087705	0.17924	0.39053	1	1478	2	-0.087705
SPINT2	5	0.19502	0.33398	1	1635	2	-0.067744	0.22126	0.39259	1	1747	2	-0.067744
MAS1L	6	0.22811	0.4074	1	1802	1	0.0093878	0.17973	0.39366	1	1481	2	0.0093878
PLXNB1	5	0.16304	0.3118	1	1413	1	0.055118	0.22605	0.39423	1	1766	1	0.055118
PPIB	6	0.51312	0.66772	1	2866	2	-0.038017	0.1799	0.39443	1	1482	2	-0.038017
SVOP	5	0.97792	0.97553	1	4290	0	0.111	0.22846	0.3951	1	1775	2	0.111
LRIG3	6	0.67512	0.75098	1	3215	1	0.13053	0.1804	0.39532	1	1485	3	0.13053
PCSK2	6	0.89743	0.90329	1	3942	0	0.11259	0.18143	0.39532	1	1494	3	0.11259
SLC28A1	6	0.84137	0.85201	1	3708	1	0.088344	0.18157	0.39532	1	1496	3	0.088344
PLAU	6	0.86197	0.86794	1	3800	0	0.077515	0.18173	0.39532	1	1498	2	0.077515
CEL	6	0.92118	0.92302	1	4051	0	0.073278	0.18139	0.39532	1	1493	3	0.073278
YARS	6	0.75933	0.7782	1	3419	1	0.069234	0.18007	0.39532	1	1483	2	0.069234
CD1B	6	0.37624	0.51552	1	2351	2	0.062301	0.18048	0.39532	1	1487	2	0.062301
CA1	6	0.62479	0.72559	1	3098	1	0.03595	0.18114	0.39532	1	1489	2	0.03595
CALCB	6	0.9121	0.91572	1	4015	0	0.011298	0.18123	0.39532	1	1491	2	0.011298
IGLV3-16	6	0.4804	0.63767	1	2742	1	0.010046	0.18158	0.39532	1	1497	1	0.010046
PLG	6	0.85926	0.86564	1	3784	0	0.0054819	0.18101	0.39532	1	1488	2	0.0054819
ENC1	6	0.37452	0.51449	1	2341	2	-0.0036738	0.18143	0.39532	1	1495	2	-0.0036738
LACRT	6	0.52832	0.68237	1	2924	1	-0.021667	0.1804	0.39532	1	1484	2	-0.021667
KITLG	6	0.63553	0.72898	1	3116	1	-0.027777	0.1812	0.39532	1	1490	2	-0.027777
EPO	6	0.11861	0.25103	1	1114	2	-0.044676	0.18045	0.39532	1	1486	1	-0.044676
MARK2	6	0.10195	0.23236	1	1000	3	-0.073518	0.18131	0.39532	1	1492	2	-0.073518
SBK2	6	0.50048	0.65535	1	2814	2	-0.089075	0.18181	0.39532	1	1499	2	-0.089075
NAAA	6	0.43418	0.56932	1	2583	1	0.10529	0.18296	0.39614	1	1505	3	0.10529
GBA	6	0.9239	0.92576	1	4066	0	0.098895	0.18223	0.39614	1	1501	3	0.098895
CYP17A1	6	0.94219	0.9426	1	4143	0	0.08486	0.18314	0.39614	1	1508	3	0.08486
PDE6A	6	0.50314	0.65658	1	2828	2	0.074078	0.18332	0.39614	1	1511	3	0.074078
SLIT1	6	0.12514	0.25896	1	1168	2	0.059945	0.18281	0.39614	1	1503	2	0.059945
SLC6A13	6	0.24036	0.41981	1	1837	1	0.054083	0.18314	0.39614	1	1509	3	0.054083
GLI2	6	0.14561	0.28769	1	1308	2	0.030589	0.18289	0.39614	1	1504	2	0.030589
CDC7	6	0.3234	0.47986	1	2152	2	0.02022	0.18217	0.39614	1	1500	3	0.02022
IL18RAP	6	0.18156	0.36267	1	1536	2	-0.0017722	0.18308	0.39614	1	1507	2	-0.0017722
LTBP1	6	0.15933	0.31794	1	1394	2	-0.045766	0.18297	0.39614	1	1506	2	-0.045766
GSTO1	6	0.30152	0.46652	1	2060	1	-0.058578	0.18322	0.39614	1	1510	2	-0.058578
EHMT1	6	0.037045	0.11889	1	442	4	-0.19195	0.1827	0.39614	1	1502	1	-0.19195
GDF6	6	0.40738	0.54205	1	2481	1	0.1365	0.18344	0.39695	1	1512	3	0.1365
ADGRE3	6	0.977	0.97562	1	4285	0	0.095296	0.18362	0.39772	1	1513	3	0.095296
APOC3	6	0.8612	0.86794	1	3794	0	0.084495	0.18393	0.39857	1	1514	3	0.084495
CEACAM1	6	0.50451	0.66028	1	2833	2	-0.068744	0.18401	0.39857	1	1515	1	-0.068744
DYRK3	6	0.88606	0.89438	1	3889	0	0.062828	0.18439	0.39944	1	1516	2	0.062828
LMCD1	6	0.041087	0.13347	1	482	1	0.020447	0.18457	0.39944	1	1517	2	0.020447
SSTR4	6	0.79513	0.79533	1	3530	1	0.080698	0.18472	0.40026	1	1518	2	0.080698
HTR1B	5	0.42763	0.57939	1	2550	1	0.010825	0.23385	0.40085	1	1797	1	0.010825
TULP3	6	0.95542	0.95702	1	4198	0	0.093702	0.18532	0.40105	1	1519	3	0.093702
APCS	6	0.42606	0.56063	1	2545	2	0.084819	0.18535	0.40105	1	1521	2	0.084819
TRPC6	6	0.11965	0.25197	1	1122	3	-0.032894	0.18551	0.40105	1	1522	2	-0.032894
ENPP3	6	0.22793	0.4074	1	1801	2	-0.079658	0.18532	0.40105	1	1520	1	-0.079658
PTPRC	6	0.95954	0.95916	1	4216	0	0.15856	0.18593	0.40185	1	1525	3	0.15856
BMP1	6	0.93991	0.94151	1	4134	0	0.041167	0.18564	0.40185	1	1523	2	0.041167
NUP62	6	0.92193	0.92377	1	4057	0	0.01724	0.1857	0.40185	1	1524	2	0.01724
UGT2B11	6	0.046465	0.14272	1	551	2	0.085773	0.18672	0.40277	1	1528	3	0.085773
TSLP	6	0.26128	0.43403	1	1917	2	0.057358	0.18689	0.40277	1	1530	2	0.057358
OAS1	6	0.92503	0.92576	1	4073	0	0.045881	0.18639	0.40277	1	1527	3	0.045881
PKM	6	0.32759	0.48677	1	2164	1	0.03925	0.18706	0.40277	1	1532	3	0.03925
PSKH1	6	0.63333	0.72787	1	3111	1	0.038429	0.18638	0.40277	1	1526	3	0.038429
CXCL13	6	0.51529	0.67156	1	2876	2	-0.063572	0.18682	0.40277	1	1529	2	-0.063572
SIRPB1	6	0.095373	0.22404	1	956	3	-0.083382	0.187	0.40277	1	1531	2	-0.083382
IFNA5	6	0.86311	0.87118	1	3803	0	0.10027	0.18719	0.40359	1	1533	3	0.10027
GP1BB	6	0.92376	0.92576	1	4065	0	0.094458	0.18727	0.40359	1	1535	3	0.094458
MAP3K21	6	0.85224	0.86453	1	3759	1	0.093968	0.18763	0.40359	1	1539	3	0.093968
MSMP	6	0.025847	0.08375	1	328	2	0.036018	0.18723	0.40359	1	1534	2	0.036018
IAPP	6	0.014221	0.053178	1	193	1	0.014852	0.18756	0.40359	1	1538	3	0.014852
CHRNA10	6	0.24053	0.41981	1	1838	2	0.00047992	0.18738	0.40359	1	1536	2	0.00047992
GPR87	6	0.31019	0.47283	1	2104	1	-0.030418	0.18748	0.40359	1	1537	2	-0.030418
KLRC2	6	0.22618	0.4044	1	1791	2	-0.078964	0.18794	0.40444	1	1540	1	-0.078964
LAIR1	6	0.50367	0.65907	1	2829	1	0.11396	0.18806	0.40527	1	1541	3	0.11396
ITGB6	6	0.26575	0.43617	1	1935	2	-0.0034072	0.18806	0.40527	1	1542	2	-0.0034072
SLC4A1	6	0.045691	0.14168	1	542	3	-0.034516	0.18812	0.40527	1	1543	3	-0.034516
CD151	6	0.95685	0.95788	1	4205	0	0.12069	0.18861	0.40611	1	1545	3	0.12069
GGCX	6	0.90737	0.91082	1	3991	0	0.10746	0.1885	0.40611	1	1544	2	0.10746
HS3ST1	6	0.4697	0.62478	1	2705	2	0.1028	0.1894	0.40611	1	1551	2	0.1028
HDAC5	6	0.26892	0.43727	1	1948	2	0.052556	0.18941	0.40611	1	1552	3	0.052556
TRPM2	6	0.10842	0.24342	1	1046	1	0.030991	0.18905	0.40611	1	1549	2	0.030991
IL2RB	6	0.32279	0.47986	1	2148	1	0.028055	0.18957	0.40611	1	1554	2	0.028055
OTOP1	6	0.45334	0.59721	1	2654	2	-0.010256	0.18943	0.40611	1	1553	1	-0.010256
SMO	6	0.15879	0.31724	1	1391	2	-0.010295	0.1889	0.40611	1	1548	2	-0.010295
PSMA2	6	0.14977	0.29579	1	1336	2	-0.016404	0.18919	0.40611	1	1550	2	-0.016404
ALDH5A1	6	0.24124	0.41981	1	1843	2	-0.072619	0.18882	0.40611	1	1546	2	-0.072619
BPIFA1	6	0.06081	0.1675	1	687	3	-0.1375	0.18887	0.40611	1	1547	1	-0.1375
OPRK1	6	0.58789	0.70967	1	3013	1	0.035108	0.18991	0.40705	1	1555	2	0.035108
SLC22A6	6	0.98441	0.98303	1	4321	0	0.14425	0.19017	0.40794	1	1557	3	0.14425
ICAM4	6	0.44919	0.59214	1	2636	2	0.13468	0.19082	0.40794	1	1560	3	0.13468
SLC22A3	6	0.89237	0.90161	1	3921	0	0.096127	0.1902	0.40794	1	1558	3	0.096127
GPC2	6	0.20292	0.38845	1	1686	1	0.085559	0.19027	0.40794	1	1559	3	0.085559
ITGAL	6	0.52761	0.68011	1	2922	1	0.06105	0.19125	0.40794	1	1563	3	0.06105
ITGB1	6	0.75345	0.77704	1	3399	1	0.045404	0.19002	0.40794	1	1556	3	0.045404
BTC	6	0.06734	0.17531	1	747	1	0.0017396	0.191	0.40794	1	1561	2	0.0017396
CDH1	6	0.02164	0.076102	1	281	4	-0.20163	0.1911	0.40794	1	1562	1	-0.20163
CAPZA2	6	0.82704	0.84059	1	3651	1	0.0026874	0.19147	0.40881	1	1564	2	0.0026874
MAP2K1	6	0.66731	0.74512	1	3194	1	0.02863	0.19166	0.40975	1	1565	2	0.02863
NPFF	6	0.23588	0.41153	1	1823	2	-0.079935	0.19167	0.40975	1	1566	2	-0.079935
HIST1H3H	6	0.92065	0.92223	1	4048	0	0.12446	0.19211	0.412	1	1568	3	0.12446
CD27	6	0.75593	0.77704	1	3413	1	0.097731	0.19205	0.412	1	1567	3	0.097731
NRXN2	6	0.80092	0.79869	1	3550	1	0.030793	0.19217	0.412	1	1569	3	0.030793
RAPGEF4	6	0.19293	0.37479	1	1618	2	0.0237	0.19236	0.412	1	1571	3	0.0237
SEMA3C	6	0.89555	0.90161	1	3934	0	0.0044996	0.19248	0.412	1	1572	3	0.0044996
A2M	6	0.67338	0.74987	1	3208	1	0.10363	0.1926	0.41288	1	1573	2	0.10363
GKN2	6	0.75276	0.77704	1	3397	1	0.07408	0.19291	0.41288	1	1575	3	0.07408
KLHL15	6	0.19576	0.37773	1	1639	3	-0.099978	0.19296	0.41288	1	1576	1	-0.099978
TGM6	6	0.02269	0.077076	1	294	4	-0.17678	0.19277	0.41288	1	1574	2	-0.17678
TMPRSS11E	5	0.31991	0.43932	1	2133	2	-0.045724	0.24173	0.41338	1	1836	2	-0.045724
BGLAP	6	0.3412	0.49373	1	2213	2	0.047869	0.19334	0.41378	1	1577	3	0.047869
CD320	6	0.39355	0.52975	1	2419	1	0.036722	0.19347	0.41378	1	1579	3	0.036722
SENP7	6	0.7643	0.78049	1	3436	1	0.035701	0.19344	0.41378	1	1578	2	0.035701
DRD4	6	0.78768	0.793	1	3504	1	-0.003074	0.19361	0.41378	1	1581	2	-0.003074
FES	6	0.188	0.36917	1	1583	3	-0.0043791	0.19378	0.41378	1	1582	3	-0.0043791
LYPD6	6	0.050218	0.15247	1	600	4	-0.10245	0.19351	0.41378	1	1580	1	-0.10245
LAD1	6	0.091577	0.22127	1	926	3	-0.19568	0.19386	0.41378	1	1583	2	-0.19568
LY9	6	0.12335	0.25805	1	1151	2	0.078021	0.19477	0.41379	1	1588	3	0.078021
OR1M1	6	0.48426	0.63882	1	2753	2	0.067517	0.19452	0.41379	1	1587	3	0.067517
APOL1	6	0.18345	0.36539	1	1547	1	0.05371	0.19489	0.41379	1	1591	3	0.05371
CA13	6	0.69773	0.75554	1	3274	1	0.045427	0.19479	0.41379	1	1589	2	0.045427
NR5A1	6	0.48269	0.63882	1	2749	2	0.022118	0.19426	0.41379	1	1584	2	0.022118
RAMP1	6	0.18522	0.36629	1	1562	2	0.0082444	0.19437	0.41379	1	1585	2	0.0082444
EREG	6	0.14639	0.29054	1	1315	3	-0.16203	0.19481	0.41379	1	1590	1	-0.16203
IL1RAPL1	6	0.0065251	0.026617	1	111	1	-0.016202	0.19504	0.41465	1	1593	2	-0.016202
IL11	6	0.48504	0.64134	1	2756	2	-0.098123	0.195	0.41465	1	1592	1	-0.098123
P2RX5	6	0.52455	0.68011	1	2915	2	0.037056	0.19572	0.4164	1	1595	3	0.037056
CEACAM8	6	0.039372	0.1305	1	468	1	-0.044752	0.19574	0.4164	1	1596	1	-0.044752
GRP	6	0.34974	0.49769	1	2241	1	0.15523	0.19675	0.41728	1	1601	3	0.15523
ADAMTSL3	6	0.84746	0.85881	1	3738	1	0.07775	0.19651	0.41728	1	1599	3	0.07775
CD300LF	6	0.60639	0.71663	1	3059	1	0.043965	0.19632	0.41728	1	1597	3	0.043965
KLHL12	6	0.3828	0.52233	1	2373	1	0.033158	0.19648	0.41728	1	1598	2	0.033158
SMPD1	6	0.51416	0.67023	1	2870	1	0.02728	0.19657	0.41728	1	1600	3	0.02728
PTPN12	6	0.96679	0.9662	1	4248	0	0.092423	0.19713	0.41812	1	1602	3	0.092423
AOC1	6	0.59691	0.71547	1	3034	1	0.13593	0.19744	0.42033	1	1603	3	0.13593
TMIGD2	6	0.20402	0.38845	1	1693	2	0.063714	0.19794	0.42119	1	1605	3	0.063714
BPI	6	0.43927	0.57914	1	2601	1	0.06127	0.19795	0.42119	1	1606	3	0.06127
STK40	6	0.90928	0.91249	1	4000	0	-0.0079879	0.19758	0.42119	1	1604	1	-0.0079879
ERN2	6	0.111	0.24342	1	1061	3	-0.0036779	0.19832	0.42199	1	1608	3	-0.0036779
ANGPTL4	6	0.99838	0.99839	1	4383	0	0.13686	0.19937	0.42406	1	1615	3	0.13686
CCL8	6	0.14779	0.29306	1	1325	1	0.10572	0.19856	0.42406	1	1609	3	0.10572
MT-ND4	6	0.62956	0.72786	1	3103	1	0.10264	0.19919	0.42406	1	1613	3	0.10264
BRS3	6	0.62253	0.72559	1	3091	1	0.0024044	0.19902	0.42406	1	1612	2	0.0024044
ADGRE2	6	0.81537	0.82132	1	3609	1	-0.0078088	0.19943	0.42406	1	1616	1	-0.0078088
IL31RA	6	0.84623	0.85653	1	3729	1	-0.055056	0.19927	0.42406	1	1614	2	-0.055056
IBSP	6	0.20169	0.38651	1	1675	3	-0.066967	0.19869	0.42406	1	1611	1	-0.066967
RNLS	6	0.92477	0.92576	1	4071	0	0.070369	0.19969	0.42593	1	1617	3	0.070369
BLM	6	0.26036	0.43403	1	1911	2	0.0070783	0.20017	0.42593	1	1622	1	0.0070783
CORT	6	0.02252	0.077076	1	292	1	0.0010798	0.19987	0.42593	1	1618	3	0.0010798
FNTA	6	0.090535	0.22127	1	919	3	-0.09466	0.20017	0.42593	1	1621	2	-0.09466
PKHD1	6	0.022533	0.077076	1	293	3	-0.097404	0.19998	0.42593	1	1619	1	-0.097404
MGLL	6	0.017316	0.067298	1	237	4	-0.15064	0.20017	0.42593	1	1620	2	-0.15064
RECQL	6	0.061995	0.168	1	702	3	-0.10016	0.20035	0.42689	1	1623	2	-0.10016
SLC5A1	5	0.82853	0.83833	1	3657	0	0.027092	0.25857	0.42768	1	1893	2	0.027092
AGER	6	0.44467	0.58668	1	2619	2	-0.0017134	0.20072	0.42782	1	1626	3	-0.0017134
CD38	6	0.08086	0.1958	1	848	1	-0.010571	0.20072	0.42782	1	1627	2	-0.010571
PDE8B	6	0.74348	0.77352	1	3374	1	-0.011332	0.20053	0.42782	1	1625	2	-0.011332
NTRK2	6	0.24581	0.4269	1	1856	2	-0.014078	0.2005	0.42782	1	1624	3	-0.014078
ATP7B	6	0.1676	0.33448	1	1445	3	-0.02566	0.20089	0.42782	1	1628	2	-0.02566
CPA5	6	0.858	0.86564	1	3780	0	0.10034	0.20125	0.42783	1	1630	3	0.10034
P2RX2	6	0.59147	0.71202	1	3024	1	0.08337	0.20107	0.42783	1	1629	3	0.08337
PDE6H	6	0.42052	0.55686	1	2524	1	0.0032287	0.20131	0.42783	1	1631	2	0.0032287
HRH4	6	0.016724	0.065855	1	225	4	-0.1718	0.20157	0.42783	1	1632	2	-0.1718
BCAN	5	0.17604	0.31549	1	1500	2	-0.0077125	0.26326	0.42865	1	1911	1	-0.0077125
H3F3B	5	0.29833	0.41947	1	2051	2	-0.10794	0.26022	0.42865	1	1901	1	-0.10794
PLA2G12B	6	0.99358	0.99315	1	4361	0	0.1083	0.20188	0.43095	1	1633	3	0.1083
RORB	6	0.21042	0.39267	1	1729	1	0.067646	0.20256	0.43095	1	1638	1	0.067646
HLCS	6	0.10812	0.24342	1	1045	1	0.065715	0.20283	0.43095	1	1640	3	0.065715
MGST2	6	0.045149	0.13991	1	535	2	0.036037	0.20207	0.43095	1	1635	3	0.036037
TK2	6	0.42507	0.56063	1	2541	2	0.035742	0.20232	0.43095	1	1636	3	0.035742
NOS2	6	0.33665	0.49256	1	2199	2	-0.0057487	0.20311	0.43095	1	1642	1	-0.0057487
TPCN1	6	0.82278	0.83495	1	3633	1	-0.015197	0.20308	0.43095	1	1641	3	-0.015197
HIST1H1E	6	0.71669	0.76344	1	3314	1	-0.022017	0.20276	0.43095	1	1639	2	-0.022017
PSMA3	6	0.12319	0.25805	1	1149	3	-0.098432	0.202	0.43095	1	1634	1	-0.098432
CXCL12	6	0.02813	0.092064	1	351	4	-0.16775	0.20233	0.43095	1	1637	2	-0.16775
NR2C2	6	0.26815	0.43727	1	1943	1	0.14978	0.20352	0.43181	1	1645	3	0.14978
GRIN2A	6	0.78998	0.793	1	3511	1	0.11153	0.20346	0.43181	1	1644	3	0.11153
HSD17B7	6	0.87742	0.88467	1	3853	0	0.10435	0.20339	0.43181	1	1643	3	0.10435
JAML	6	0.58767	0.70967	1	3011	1	0.10105	0.2044	0.43181	1	1651	3	0.10105
ITGA11	6	0.23948	0.41981	1	1833	1	0.035071	0.20453	0.43181	1	1652	3	0.035071
PRSS3	6	0.59899	0.71662	1	3036	1	0.033256	0.20429	0.43181	1	1650	2	0.033256
UGT2A1	6	0.82699	0.84059	1	3650	1	0.027871	0.2037	0.43181	1	1646	2	0.027871
S100B	6	0.52702	0.68011	1	2920	1	-0.010981	0.20463	0.43181	1	1653	2	-0.010981
RXFP3	6	0.13209	0.27148	1	1214	3	-0.098234	0.20384	0.43181	1	1647	1	-0.098234
AURKA	6	0.044762	0.13943	1	530	4	-0.11896	0.20421	0.43181	1	1649	2	-0.11896
IGLV2-11	5	0.77838	0.78934	1	3480	1	-0.032907	0.26658	0.43339	1	1925	1	-0.032907
TAPBPL	6	0.40888	0.54589	1	2487	1	0.10017	0.20503	0.43508	1	1658	3	0.10017
CACNB3	6	0.23833	0.41465	1	1829	1	0.085815	0.20522	0.43508	1	1659	3	0.085815
NT5E	6	0.27581	0.44478	1	1970	1	0.035559	0.20484	0.43508	1	1655	3	0.035559
COL4A6	6	0.4887	0.64261	1	2770	1	0.026099	0.20531	0.43508	1	1660	1	0.026099
CLK1	6	0.34247	0.49373	1	2220	2	-0.011969	0.20498	0.43508	1	1657	2	-0.011969
CACNA1D	6	0.2054	0.39047	1	1701	2	-0.061491	0.20494	0.43508	1	1656	1	-0.061491
GPX2	5	0.35467	0.48399	1	2258	2	0.035701	0.26917	0.43523	1	1936	2	0.035701
MPZL3	5	0.17238	0.31354	1	1478	1	-0.050014	0.26834	0.43523	1	1933	2	-0.050014
TNFRSF10A	6	0.013941	0.05221	1	187	3	-0.11486	0.20549	0.43595	1	1661	1	-0.11486
ACACA	6	0.92891	0.92713	1	4094	0	0.11299	0.20611	0.43693	1	1666	3	0.11299
RXRB	6	0.96414	0.96399	1	4238	0	0.10669	0.20662	0.43693	1	1669	3	0.10669
CCKBR	6	0.028597	0.093611	1	357	2	0.10336	0.20579	0.43693	1	1664	3	0.10336
PTPN22	6	0.10489	0.23546	1	1026	2	0.093467	0.20681	0.43693	1	1671	3	0.093467
PDE7A	6	0.07993	0.19516	1	842	2	0.051928	0.20725	0.43693	1	1673	3	0.051928
VIPR2	6	0.30677	0.47178	1	2086	1	0.038908	0.20634	0.43693	1	1668	2	0.038908
RAF1	6	0.027381	0.086808	1	342	3	-0.0014334	0.20624	0.43693	1	1667	3	-0.0014334
GSTO2	6	0.57424	0.70511	1	2992	1	-0.0061709	0.20567	0.43693	1	1663	2	-0.0061709
DRD1	6	0.5581	0.69952	1	2960	1	-0.018325	0.20677	0.43693	1	1670	1	-0.018325
FKBP1A	6	0.15088	0.30152	1	1342	2	-0.030917	0.20769	0.43693	1	1675	2	-0.030917
BMP2	6	0.19433	0.37576	1	1629	3	-0.052787	0.20586	0.43693	1	1665	1	-0.052787
VEGFA	6	0.27615	0.44478	1	1971	2	-0.095829	0.2075	0.43693	1	1674	1	-0.095829
RGS4	6	0.14356	0.28233	1	1294	3	-0.11901	0.20724	0.43693	1	1672	2	-0.11901
CYP2F1	5	0.062042	0.14012	1	703	2	-0.045678	0.27377	0.43713	1	1955	1	-0.045678
EGLN3	6	0.026544	0.085946	1	334	2	0.10222	0.20827	0.43897	1	1680	3	0.10222
RPS6KB1	6	0.85461	0.86564	1	3766	1	0.061206	0.20801	0.43897	1	1677	3	0.061206
IL7R	6	0.27411	0.44369	1	1964	2	0.017889	0.20788	0.43897	1	1676	2	0.017889
SLC10A1	6	0.22749	0.4074	1	1798	2	-0.10708	0.20823	0.43897	1	1679	1	-0.10708
GLP1R	6	0.42179	0.55961	1	2528	1	0.11772	0.20935	0.43898	1	1685	3	0.11772
CFH	6	0.84147	0.85201	1	3709	1	0.086627	0.20916	0.43898	1	1684	3	0.086627
ANGPTL1	6	0.60629	0.71663	1	3058	1	0.069496	0.20896	0.43898	1	1682	2	0.069496
KCNS3	6	0.82678	0.84059	1	3648	1	-0.043834	0.209	0.43898	1	1683	2	-0.043834
MAGEA3	6	0.024372	0.079755	1	312	3	-0.07772	0.20884	0.43898	1	1681	3	-0.07772
KLHL13	6	0.22578	0.4044	1	1790	2	-0.070112	0.20942	0.43999	1	1686	2	-0.070112
PDCD1	6	0.028164	0.092292	1	353	3	-0.090774	0.20951	0.43999	1	1687	1	-0.090774
KRT18	6	0.41031	0.54922	1	2492	1	-0.012459	0.2102	0.4408	1	1689	2	-0.012459
TM2D1	6	0.3625	0.50641	1	2290	1	-0.04255	0.21006	0.4408	1	1688	2	-0.04255
LAMB3	5	0.50976	0.62472	1	2849	1	-0.0057077	0.27548	0.44176	1	1965	2	-0.0057077
FCN3	6	0.53982	0.68992	1	2937	1	0.16371	0.21037	0.4418	1	1690	3	0.16371
RPS6KA1	6	0.23647	0.41249	1	1825	1	0.041013	0.21062	0.4418	1	1691	2	0.041013
EFNA1	6	0.40119	0.53537	1	2456	2	-0.013208	0.21114	0.4418	1	1693	2	-0.013208
TF	6	0.30579	0.47178	1	2083	1	-0.03232	0.21133	0.4418	1	1694	2	-0.03232
IGFBP4	6	0.074216	0.18048	1	808	2	-0.062769	0.21079	0.4418	1	1692	1	-0.062769
INSL6	6	0.87895	0.88574	1	3867	0	0.14327	0.2117	0.4426	1	1697	2	0.14327
TK1	6	0.98949	0.98825	1	4342	0	0.10764	0.21152	0.4426	1	1696	3	0.10764
CD81	6	0.099385	0.23097	1	982	3	-0.030278	0.21151	0.4426	1	1695	2	-0.030278
GPR17	6	0.95993	0.95916	1	4219	0	0.092922	0.21191	0.44261	1	1699	3	0.092922
C1RL	6	0.63639	0.72898	1	3118	1	-0.013845	0.21188	0.44261	1	1698	1	-0.013845
NPY2R	5	0.17697	0.31648	1	1509	1	0.097439	0.27662	0.44279	1	1973	2	0.097439
KLK12	6	0.037703	0.12014	1	449	2	0.061737	0.21242	0.4435	1	1701	2	0.061737
FGF5	6	0.77893	0.78617	1	3482	1	0.030941	0.21224	0.4435	1	1700	2	0.030941
HRH3	6	0.53045	0.68703	1	2926	1	0.085243	0.21346	0.44453	1	1703	2	0.085243
ULK1	6	0.97849	0.97692	1	4292	0	0.049947	0.21351	0.44453	1	1704	2	0.049947
CDK8	6	0.41572	0.5509	1	2507	1	-0.0055475	0.21496	0.44453	1	1708	1	-0.0055475
IGLL5	6	0.11114	0.24387	1	1065	3	-0.028576	0.2148	0.44453	1	1707	3	-0.028576
STATH	6	0.33108	0.4904	1	2178	2	-0.037578	0.21442	0.44453	1	1706	1	-0.037578
SLK	6	0.28398	0.44787	1	2001	2	-0.053075	0.21406	0.44453	1	1705	1	-0.053075
DHRS3	6	0.13758	0.27638	1	1250	3	-0.065596	0.21297	0.44453	1	1702	1	-0.065596
IL17F	6	0.42947	0.56331	1	2560	2	-0.072619	0.21501	0.44453	1	1709	2	-0.072619
MASP1	6	0.32359	0.47986	1	2153	1	0.12129	0.21615	0.44667	1	1713	3	0.12129
MRGPRX3	6	0.38321	0.52233	1	2375	2	0.094272	0.21602	0.44667	1	1711	3	0.094272
SLC6A17	6	0.83668	0.84639	1	3687	1	0.082267	0.21544	0.44667	1	1710	3	0.082267
PKD2	6	0.29839	0.46544	1	2052	1	0.041017	0.21605	0.44667	1	1712	1	0.041017
EPYC	6	0.82352	0.83495	1	3636	1	0.014658	0.21641	0.44667	1	1715	1	0.014658
DST	6	0.39981	0.53426	1	2447	2	0.0060021	0.21647	0.44667	1	1716	3	0.0060021
PI15	6	0.74097	0.77352	1	3365	1	-0.0028111	0.21659	0.44667	1	1717	1	-0.0028111
KCNJ8	6	0.93139	0.92781	1	4106	0	-0.02607	0.21639	0.44667	1	1714	2	-0.02607
DYRK4	6	0.041301	0.13347	1	483	2	0.092614	0.21686	0.44757	1	1718	3	0.092614
SLC13A1	6	0.78194	0.78966	1	3491	1	0.083376	0.21714	0.44757	1	1722	2	0.083376
HTR5A	6	0.16547	0.33349	1	1428	2	0.052874	0.21734	0.44757	1	1724	2	0.052874
RPS6KL1	6	0.37189	0.5127	1	2325	1	0.05201	0.21708	0.44757	1	1721	2	0.05201
BTN3A2	6	0.91916	0.9216	1	4041	0	0.031163	0.217	0.44757	1	1720	2	0.031163
COL26A1	6	0.65379	0.74056	1	3160	1	-0.0040572	0.21691	0.44757	1	1719	2	-0.0040572
EPHA4	6	0.0045795	0.016282	0.974202	90	4	-0.3107	0.21732	0.44757	1	1723	1	-0.3107
SLCO3A1	6	0.92762	0.92576	1	4087	0	0.12061	0.21744	0.44847	1	1725	3	0.12061
AKT3	6	0.87792	0.88467	1	3856	0	0.10122	0.21841	0.44847	1	1731	3	0.10122
FGFR4	6	0.84938	0.86106	1	3746	1	0.094897	0.21757	0.44847	1	1726	3	0.094897
IL1R2	6	0.9599	0.95916	1	4218	0	0.087444	0.21932	0.44847	1	1735	3	0.087444
COL3A1	6	0.29452	0.46348	1	2029	2	0.080876	0.21919	0.44847	1	1733	3	0.080876
LMTK3	6	0.90349	0.90917	1	3968	0	0.068922	0.21925	0.44847	1	1734	3	0.068922
APOA4	6	0.47654	0.63385	1	2728	1	0.057775	0.21812	0.44847	1	1729	2	0.057775
POR	6	0.17649	0.35577	1	1504	1	0.052982	0.21855	0.44847	1	1732	2	0.052982
CCL27	6	0.056616	0.16084	1	657	2	0.043881	0.21777	0.44847	1	1727	2	0.043881
QDPR	6	0.76648	0.78267	1	3443	1	-0.053865	0.21822	0.44847	1	1730	2	-0.053865
FGF23	6	0.021867	0.076103	1	284	3	-0.14025	0.21786	0.44847	1	1728	2	-0.14025
CNMD	6	0.51999	0.6767	1	2894	2	0.063814	0.2194	0.44954	1	1738	1	0.063814
AMHR2	6	0.93939	0.94151	1	4133	0	0.063078	0.2194	0.44954	1	1737	1	0.063078
FXYD2	6	0.56568	0.70288	1	2974	1	-0.038622	0.2194	0.44954	1	1736	2	-0.038622
TNK2	6	0.6821	0.75215	1	3241	1	0.09965	0.2201	0.45061	1	1739	3	0.09965
MAP3K4	6	0.37594	0.51552	1	2349	1	0.085323	0.22201	0.45061	1	1749	2	0.085323
RXFP4	6	0.18752	0.36818	1	1580	2	0.064871	0.22071	0.45061	1	1745	2	0.064871
CDKL3	6	0.81015	0.81349	1	3589	1	0.055723	0.22042	0.45061	1	1742	3	0.055723
C1QTNF8	6	0.48937	0.64387	1	2778	2	0.016737	0.22029	0.45061	1	1741	3	0.016737
ADA	6	0.90577	0.90999	1	3984	0	0.015416	0.22184	0.45061	1	1748	2	0.015416
GPR26	6	0.35728	0.50049	1	2269	2	-0.056823	0.22057	0.45061	1	1744	1	-0.056823
NBL1	6	0.16096	0.32044	1	1402	3	-0.10703	0.22093	0.45061	1	1746	1	-0.10703
PTGS2	6	0.1397	0.27709	1	1267	3	-0.11083	0.22021	0.45061	1	1740	1	-0.11083
NR2F2	6	0.024158	0.079753	1	307	2	-0.073155	0.22237	0.45153	1	1750	1	-0.073155
LDLR	6	0.35337	0.50049	1	2253	2	-0.11651	0.22253	0.45153	1	1751	2	-0.11651
CORIN	5	0.91358	0.91519	1	4023	0	0.062328	0.28613	0.45184	1	2008	1	0.062328
LIPG	6	0.44104	0.58404	1	2606	1	0.085611	0.22327	0.45356	1	1752	1	0.085611
GPR153	6	0.018541	0.067758	1	247	2	0.047045	0.22327	0.45356	1	1753	2	0.047045
IL10	6	0.84361	0.85432	1	3719	1	-0.0052728	0.22349	0.45356	1	1754	2	-0.0052728
TPSAB1	2	0.62052	0.62354	1	3085	0	0.043519	0.44526	0.45366	1	2604	1	0.043519
BMP4	6	0.88776	0.89619	1	3897	0	0.083425	0.22399	0.45554	1	1755	2	0.083425
GPR146	6	0.39032	0.52803	1	2407	2	-0.011097	0.22434	0.45554	1	1756	2	-0.011097
F2RL1	6	0.85385	0.86564	1	3764	1	-0.014479	0.22488	0.45554	1	1758	1	-0.014479
OXER1	6	0.18798	0.36917	1	1582	2	-0.066955	0.22452	0.45554	1	1757	1	-0.066955
VAMP8	6	0.35407	0.50049	1	2256	1	0.09137	0.23317	0.45759	1	1794	2	0.09137
OPRM1	6	0.96443	0.96399	1	4240	0	0.081756	0.23483	0.45759	1	1804	2	0.081756
ADAMTS14	6	0.95967	0.95916	1	4217	0	0.074096	0.22688	0.45759	1	1768	2	0.074096
ERN1	6	0.65671	0.74056	1	3168	1	0.071214	0.22671	0.45759	1	1767	2	0.071214
GPR19	6	0.50142	0.65535	1	2820	2	0.070332	0.23465	0.45759	1	1802	2	0.070332
DEFB115	6	0.040658	0.13347	1	479	2	0.065619	0.23025	0.45759	1	1782	2	0.065619
SMAD3	6	0.32322	0.47986	1	2151	2	0.063463	0.23541	0.45759	1	1809	1	0.063463
ALDH8A1	6	0.24089	0.41981	1	1839	2	0.059713	0.22953	0.45759	1	1781	1	0.059713
EDIL3	6	0.71878	0.76459	1	3316	1	0.054587	0.22846	0.45759	1	1776	2	0.054587
WNT7B	6	0.85708	0.86564	1	3777	0	0.049638	0.23399	0.45759	1	1798	1	0.049638
LIPI	6	0.26317	0.43617	1	1926	1	0.049446	0.22827	0.45759	1	1774	2	0.049446
CBR3	6	0.95704	0.95788	1	4207	0	0.048157	0.2347	0.45759	1	1803	2	0.048157
SLC28A2	6	0.50117	0.65535	1	2818	2	0.047703	0.22523	0.45759	1	1759	2	0.047703
PRKCA	6	0.90988	0.91489	1	4005	0	0.045442	0.23588	0.45759	1	1811	2	0.045442
SLURP1	6	0.90562	0.90999	1	3983	0	0.038747	0.23132	0.45759	1	1786	2	0.038747
KCNJ2	6	0.84919	0.86106	1	3744	1	0.034019	0.23194	0.45759	1	1791	2	0.034019
TBK1	6	0.90377	0.90917	1	3971	0	0.021903	0.23439	0.45759	1	1801	2	0.021903
CACNA1E	6	0.51257	0.66772	1	2861	1	0.016218	0.22918	0.45759	1	1779	1	0.016218
DAPK2	6	0.096462	0.2273	1	961	1	0.011012	0.23527	0.45759	1	1808	2	0.011012
FRK	6	0.92054	0.92223	1	4047	0	0.010121	0.23028	0.45759	1	1783	2	0.010121
CRISPLD2	6	0.049622	0.15159	1	592	2	0.0049401	0.22596	0.45759	1	1764	2	0.0049401
EMC10	6	0.3127	0.47664	1	2111	2	0.0038229	0.23381	0.45759	1	1796	2	0.0038229
GSTM2	6	0.15677	0.31558	1	1379	2	0.0037555	0.22814	0.45759	1	1773	2	0.0037555
SIGLEC1	6	0.60312	0.71662	1	3046	1	-0.0053973	0.23274	0.45759	1	1793	1	-0.0053973
TOP1MT	6	0.51529	0.67156	1	2874	2	-0.006995	0.2256	0.45759	1	1761	1	-0.006995
PYGL	6	0.94869	0.95091	1	4171	0	-0.014136	0.23523	0.45759	1	1807	1	-0.014136
EIF2AK3	6	0.14765	0.29306	1	1324	2	-0.014944	0.2315	0.45759	1	1788	2	-0.014944
CSF3	6	0.72827	0.76904	1	3336	1	-0.019678	0.23505	0.45759	1	1806	1	-0.019678
VAMP2	6	0.10529	0.2363	1	1029	1	-0.023412	0.2361	0.45759	1	1812	2	-0.023412
DRD2	6	0.20476	0.39047	1	1699	1	-0.023567	0.22578	0.45759	1	1762	1	-0.023567
NUP210	6	0.0042594	0.015155	0.963832	83	2	-0.034736	0.23343	0.45759	1	1795	2	-0.034736
FGR	6	0.40794	0.54323	1	2482	2	-0.04054	0.22882	0.45759	1	1778	1	-0.04054
ANGPT4	6	0.21933	0.40233	1	1763	2	-0.042657	0.23043	0.45759	1	1784	2	-0.042657
SMOC1	6	0.08684	0.20979	1	895	1	-0.046488	0.22749	0.45759	1	1771	2	-0.046488
CCNB1	6	0.16435	0.3272	1	1419	2	-0.047205	0.23487	0.45759	1	1805	1	-0.047205
CCDC3	6	0.69386	0.75554	1	3265	1	-0.053546	0.23185	0.45759	1	1790	1	-0.053546
MMP10	6	0.087048	0.2098	1	898	3	-0.057176	0.23239	0.45759	1	1792	2	-0.057176
BCR	6	0.16789	0.33448	1	1446	3	-0.057288	0.22775	0.45759	1	1772	2	-0.057288
CDNF	6	0.21351	0.39459	1	1740	2	-0.062632	0.23416	0.45759	1	1799	1	-0.062632
TRPC1	6	0.070433	0.17596	1	769	3	-0.068307	0.22732	0.45759	1	1770	2	-0.068307
IGSF8	6	0.042921	0.13536	1	507	3	-0.071292	0.22592	0.45759	1	1763	2	-0.071292
FAM19A4	6	0.30808	0.47283	1	2094	2	-0.074706	0.22531	0.45759	1	1760	2	-0.074706
EDA	6	0.14481	0.28603	1	1302	3	-0.078669	0.23107	0.45759	1	1785	2	-0.078669
IL1R1	6	0.083886	0.19792	1	873	3	-0.084879	0.22601	0.45759	1	1765	2	-0.084879
IL25	6	0.27143	0.44264	1	1956	2	-0.09683	0.22936	0.45759	1	1780	1	-0.09683
KCNA10	6	0.18439	0.36539	1	1554	3	-0.107	0.23553	0.45759	1	1810	2	-0.107
PPIL6	6	0.038763	0.12454	1	459	2	-0.10974	0.2315	0.45759	1	1787	1	-0.10974
ADAM32	6	0.0039613	0.01386	0.961768	75	3	-0.1115	0.23422	0.45759	1	1800	2	-0.1115
KRT19	6	0.19125	0.3729	1	1612	3	-0.11165	0.23167	0.45759	1	1789	2	-0.11165
FGFR3	6	0.14097	0.27995	1	1274	2	-0.12367	0.22703	0.45759	1	1769	1	-0.12367
SLC18A2	6	0.042652	0.13536	1	500	4	-0.1549	0.22864	0.45759	1	1777	1	-0.1549
NECTIN1	6	0.97261	0.9719	1	4267	0	0.10015	0.23886	0.45996	1	1824	2	0.10015
PLA2G12A	6	0.88761	0.89619	1	3896	0	0.091635	0.23895	0.45996	1	1825	1	0.091635
KLHL4	6	0.89673	0.90161	1	3940	0	0.078906	0.23948	0.45996	1	1829	2	0.078906
STAT5A	6	0.48885	0.64261	1	2771	2	0.043218	0.23746	0.45996	1	1818	2	0.043218
THBS4	6	0.95116	0.95288	1	4180	0	0.040448	0.23966	0.45996	1	1832	2	0.040448
ASGR1	6	0.61126	0.719	1	3070	1	0.04041	0.23693	0.45996	1	1814	2	0.04041
KLHL17	6	0.85519	0.86564	1	3767	0	0.039635	0.23859	0.45996	1	1823	1	0.039635
WNT10A	6	0.2247	0.4044	1	1785	1	0.0083942	0.23735	0.45996	1	1817	1	0.0083942
TMIGD3	6	0.33441	0.49256	1	2191	1	0.0045757	0.23799	0.45996	1	1821	2	0.0045757
DAGLB	6	0.8145	0.81798	1	3606	1	0.004049	0.23913	0.45996	1	1826	2	0.004049
TGM2	6	0.91704	0.91947	1	4034	0	0.0024552	0.237	0.45996	1	1815	2	0.0024552
KCNK18	6	0.10094	0.23163	1	994	2	-0.011459	0.24045	0.45996	1	1833	2	-0.011459
MYO3B	6	0.15568	0.31461	1	1371	3	-0.019531	0.23764	0.45996	1	1820	2	-0.019531
PSG2	6	0.2599	0.43403	1	1908	2	-0.02346	0.23718	0.45996	1	1816	2	-0.02346
KERA	6	0.38974	0.52802	1	2403	1	-0.036642	0.23965	0.45996	1	1831	2	-0.036642
KLHL30	6	0.16669	0.33448	1	1435	2	-0.050441	0.24053	0.45996	1	1834	1	-0.050441
BGN	6	0.091358	0.22127	1	925	3	-0.05506	0.2393	0.45996	1	1828	2	-0.05506
MUCL1	6	0.18048	0.35921	1	1530	2	-0.0569	0.23948	0.45996	1	1830	2	-0.0569
POMC	6	0.096357	0.2273	1	960	3	-0.099451	0.23753	0.45996	1	1819	1	-0.099451
PATE4	6	0.047852	0.14887	1	570	3	-0.12504	0.23922	0.45996	1	1827	2	-0.12504
CREBBP	6	0.015694	0.060413	1	207	3	-0.12732	0.23842	0.45996	1	1822	1	-0.12732
CSNK1G3	6	0.024193	0.079755	1	308	4	-0.17789	0.23676	0.45996	1	1813	2	-0.17789
CHRNA6	6	0.31149	0.47475	1	2107	1	0.060057	0.24194	0.46205	1	1837	2	0.060057
DIO1	6	0.75095	0.77704	1	3391	1	0.0088412	0.24141	0.46205	1	1835	2	0.0088412
IL27	6	0.12773	0.26488	1	1185	3	-0.027497	0.24203	0.46205	1	1838	2	-0.027497
KLK15	5	0.67938	0.7055	1	3235	1	0.082434	0.29441	0.46209	1	2035	2	0.082434
ITIH4	6	0.02172	0.076102	1	283	2	-0.00071404	0.24393	0.46408	1	1840	2	-0.00071404
MAT1A	6	0.12762	0.26488	1	1184	2	-0.071393	0.2423	0.46408	1	1839	2	-0.071393
F10	6	0.008474	0.03102	1	129	2	0.097331	0.24423	0.46495	1	1841	2	0.097331
TTBK1	6	0.020995	0.075328	1	273	3	-0.053343	0.24458	0.46585	1	1842	1	-0.053343
ADRB1	6	0.82642	0.84059	1	3645	1	0.076804	0.24546	0.46671	1	1844	2	0.076804
CLCA2	6	0.81379	0.81798	1	3604	1	0.063046	0.24503	0.46671	1	1843	2	0.063046
CXCL3	6	0.79346	0.79415	1	3527	1	0.045486	0.24669	0.46671	1	1851	1	0.045486
SEMA4B	6	0.76872	0.78383	1	3449	1	0.045187	0.24653	0.46671	1	1850	2	0.045187
SERPINB11	6	0.5809	0.70735	1	3004	1	0.04465	0.24591	0.46671	1	1846	2	0.04465
MTOR	6	0.33235	0.49148	1	2184	2	-0.029139	0.24616	0.46671	1	1847	2	-0.029139
ITGB8	6	0.43238	0.56605	1	2571	1	-0.037218	0.24644	0.46671	1	1849	2	-0.037218
NPY5R	6	0.30532	0.47178	1	2079	2	-0.091949	0.24556	0.46671	1	1845	2	-0.091949
ADGRL1	6	0.0295	0.09551	1	368	2	-0.11108	0.24635	0.46671	1	1848	2	-0.11108
CTBS	6	0.74809	0.77474	1	3382	1	0.13135	0.25053	0.46757	1	1868	2	0.13135
CHRNA9	6	0.030808	0.097327	1	377	2	0.082427	0.24874	0.46757	1	1859	2	0.082427
NMBR	6	0.96128	0.96048	1	4225	0	0.080744	0.2521	0.46757	1	1872	1	0.080744
GHRH	6	0.70813	0.7611	1	3299	1	0.065109	0.24931	0.46757	1	1863	2	0.065109
CD5L	6	0.97554	0.97417	1	4282	0	0.057495	0.25105	0.46757	1	1870	2	0.057495
CXCL5	6	0.29579	0.46348	1	2037	2	0.03066	0.24878	0.46757	1	1860	2	0.03066
NXPE1	6	0.26231	0.43513	1	1922	2	0.02809	0.24847	0.46757	1	1857	2	0.02809
GPR27	6	0.43652	0.57414	1	2592	2	0.024497	0.24844	0.46757	1	1856	2	0.024497
CYP2C18	6	0.24546	0.42579	1	1854	2	0.024355	0.2498	0.46757	1	1865	2	0.024355
SLC22A25	6	0.0096094	0.034218	1	136	2	0.021356	0.25068	0.46757	1	1869	2	0.021356
GZMH	6	0.13036	0.2699	1	1204	2	0.011568	0.25192	0.46757	1	1871	2	0.011568
FGFBP1	6	0.40082	0.53537	1	2452	1	-0.0016012	0.24913	0.46757	1	1862	2	-0.0016012
OR10A5	6	0.53551	0.68818	1	2931	1	-0.0048973	0.24962	0.46757	1	1864	2	-0.0048973
UHMK1	6	0.20347	0.38845	1	1688	2	-0.004961	0.24891	0.46757	1	1861	2	-0.004961
BOLA1	6	0.217	0.3985	1	1753	2	-0.025018	0.24768	0.46757	1	1854	2	-0.025018
GABRD	6	0.22685	0.40538	1	1794	1	-0.033748	0.24756	0.46757	1	1853	2	-0.033748
CSF1R	6	0.062637	0.1685	1	711	3	-0.043478	0.25018	0.46757	1	1867	1	-0.043478
MMP25	6	0.127	0.25993	1	1181	3	-0.054981	0.24983	0.46757	1	1866	2	-0.054981
SGK1	6	0.21515	0.3967	1	1749	2	-0.074183	0.24704	0.46757	1	1852	1	-0.074183
CTSG	6	0.084808	0.2044	1	879	2	-0.090032	0.24861	0.46757	1	1858	1	-0.090032
PPME1	6	0.027669	0.087374	1	348	3	-0.11693	0.24838	0.46757	1	1855	2	-0.11693
KCNN2	6	0.22666	0.40538	1	1792	2	0.038227	0.25349	0.47037	1	1874	1	0.038227
ERAP1	6	0.62429	0.72559	1	3096	1	0.019483	0.25538	0.47037	1	1879	2	0.019483
C5	6	0.19333	0.37479	1	1625	1	0.012796	0.25419	0.47037	1	1877	2	0.012796
HTR1A	6	0.15104	0.30152	1	1344	2	-0.026652	0.25557	0.47037	1	1880	2	-0.026652
MATN2	6	0.12015	0.2526	1	1125	1	-0.026672	0.25471	0.47037	1	1878	1	-0.026672
GRID2	6	0.14272	0.28167	1	1288	2	-0.030099	0.25378	0.47037	1	1875	2	-0.030099
LOXL2	6	0.52016	0.67786	1	2896	2	-0.06161	0.2528	0.47037	1	1873	1	-0.06161
CXCR6	6	0.85152	0.86342	1	3755	1	-0.063537	0.25401	0.47037	1	1876	2	-0.063537
CDK2	6	0.24	0.41981	1	1836	1	0.060705	0.25662	0.47122	1	1882	2	0.060705
FOLR2	6	0.52058	0.67786	1	2897	2	0.047366	0.25734	0.47122	1	1887	2	0.047366
COL4A5	6	0.97235	0.9719	1	4265	0	0.034795	0.25725	0.47122	1	1885	2	0.034795
KCNG4	6	0.57206	0.70399	1	2986	1	-0.0044947	0.25765	0.47122	1	1888	2	-0.0044947
LGALS8	6	0.76226	0.77936	1	3428	1	-0.0071028	0.25661	0.47122	1	1881	2	-0.0071028
BDKRB1	6	0.2802	0.44674	1	1984	1	-0.0090503	0.25731	0.47122	1	1886	1	-0.0090503
OLFML1	6	0.095238	0.22404	1	954	3	-0.096058	0.25783	0.47122	1	1889	1	-0.096058
SERPINA9	6	0.06769	0.17531	1	750	3	-0.11674	0.25671	0.47122	1	1883	2	-0.11674
PCSK9	6	0.052667	0.15681	1	626	3	-0.21642	0.25713	0.47122	1	1884	1	-0.21642
PIK3C3	6	0.3352	0.49256	1	2193	2	0.052062	0.25867	0.47206	1	1894	2	0.052062
ADAMTSL4	6	0.95351	0.95475	1	4190	0	0.031755	0.25822	0.47206	1	1891	2	0.031755
KCNK9	6	0.21993	0.40233	1	1768	2	0.016789	0.25886	0.47206	1	1896	2	0.016789
FBLN2	6	0.15495	0.3112	1	1364	2	-0.0055781	0.25852	0.47206	1	1892	2	-0.0055781
KLK14	6	0.18869	0.36917	1	1591	2	-0.026662	0.25885	0.47206	1	1895	2	-0.026662
JAK2	6	0.055347	0.1603	1	647	2	-0.030923	0.25817	0.47206	1	1890	2	-0.030923
ACRBP	6	0.71552	0.76344	1	3312	1	0.09322	0.26063	0.47372	1	1904	2	0.09322
GALR1	6	0.022302	0.076508	1	287	2	0.088405	0.25974	0.47372	1	1899	2	0.088405
SSTR1	6	0.048984	0.15066	1	586	2	0.04831	0.26214	0.47372	1	1907	2	0.04831
DCK	6	0.52104	0.67786	1	2898	1	0.00075179	0.25973	0.47372	1	1898	2	0.00075179
HSPG2	6	0.37279	0.51449	1	2332	2	-0.0046093	0.26059	0.47372	1	1903	1	-0.0046093
PTX3	6	0.1064	0.23695	1	1034	1	-0.012882	0.26188	0.47372	1	1906	1	-0.012882
CCRL2	6	0.48729	0.64261	1	2764	2	-0.05786	0.26024	0.47372	1	1902	1	-0.05786
HTRA3	6	0.1609	0.32044	1	1401	2	-0.076346	0.26134	0.47372	1	1905	2	-0.076346
ACACB	6	0.050576	0.15248	1	603	3	-0.14662	0.26009	0.47372	1	1900	2	-0.14662
TESK2	6	0.042829	0.13536	1	504	3	-0.27	0.25955	0.47372	1	1897	1	-0.27
STK3	6	0.0080683	0.03059	1	127	2	0.05119	0.2629	0.4746	1	1909	2	0.05119
SFRP2	6	0.40111	0.53537	1	2455	1	0.029894	0.26283	0.4746	1	1908	1	0.029894
PSCA	6	0.038909	0.12553	1	462	4	-0.16148	0.263	0.4746	1	1910	1	-0.16148
OR1D2	6	0.9887	0.98753	1	4337	0	0.10977	0.26369	0.47549	1	1915	2	0.10977
RNASE4	6	0.75462	0.77704	1	3405	1	0.10052	0.2633	0.47549	1	1912	2	0.10052
APOM	6	0.99064	0.9891	1	4349	0	0.062556	0.26352	0.47549	1	1914	2	0.062556
ATP2A3	6	0.18544	0.36629	1	1565	3	-0.019131	0.26334	0.47549	1	1913	1	-0.019131
CYP27A1	6	0.066638	0.17334	1	742	3	-0.060625	0.26403	0.4755	1	1916	2	-0.060625
S100A7	6	0.28165	0.44674	1	1991	2	-0.065616	0.2642	0.4755	1	1917	1	-0.065616
SELPLG	6	0.84445	0.85433	1	3720	1	0.078032	0.26489	0.47631	1	1919	1	0.078032
ACP6	6	0.32022	0.47986	1	2135	1	0.065954	0.26571	0.47631	1	1922	2	0.065954
PIK3R1	6	0.017285	0.067298	1	235	1	0.01354	0.26558	0.47631	1	1921	1	0.01354
PDE4A	6	0.56012	0.69952	1	2962	1	0.012142	0.26508	0.47631	1	1920	2	0.012142
FLT1	6	0.12517	0.25896	1	1169	3	-0.12488	0.26592	0.47631	1	1923	1	-0.12488
CLU	6	0.0097382	0.034534	1	137	4	-0.228	0.26455	0.47631	1	1918	1	-0.228
FNTB	6	0.47468	0.63114	1	2720	2	0.089133	0.26678	0.47721	1	1927	2	0.089133
MMP19	6	0.96588	0.96511	1	4245	0	0.087451	0.26767	0.47721	1	1931	2	0.087451
RPS6KA6	6	0.25523	0.43199	1	1891	1	0.077821	0.26758	0.47721	1	1930	2	0.077821
IK	6	0.74935	0.77586	1	3385	1	0.077378	0.26749	0.47721	1	1929	2	0.077378
LGI1	6	0.34289	0.49373	1	2222	2	0.066474	0.26731	0.47721	1	1928	2	0.066474
TM4SF1	6	0.86068	0.86679	1	3789	0	0.063427	0.26776	0.47721	1	1932	2	0.063427
KDM4C	6	0.23833	0.41465	1	1830	2	0.061727	0.26661	0.47721	1	1926	1	0.061727
CCL2	6	0.13686	0.27638	1	1246	1	-0.075076	0.26643	0.47721	1	1924	1	-0.075076
SLC19A1	6	0.19231	0.37386	1	1616	1	0.076166	0.27371	0.47905	1	1954	2	0.076166
IFNA10	6	0.32215	0.47986	1	2145	1	0.062882	0.27428	0.47905	1	1958	2	0.062882
TRPM6	6	0.80842	0.81235	1	3582	1	0.059419	0.27053	0.47905	1	1943	2	0.059419
MMP1	6	0.87516	0.88067	1	3843	0	0.053615	0.27071	0.47905	1	1944	2	0.053615
GUCY1A3	6	0.41988	0.55522	1	2519	2	0.047662	0.27173	0.47905	1	1946	1	0.047662
FAM19A1	6	0.92723	0.92576	1	4086	0	0.042365	0.27322	0.47905	1	1952	2	0.042365
GUCY2C	6	0.23247	0.40842	1	1813	2	0.022662	0.26874	0.47905	1	1934	2	0.022662
ROCK1	6	0.83237	0.84292	1	3672	1	0.0073615	0.27205	0.47905	1	1948	2	0.0073615
LTF	6	0.30292	0.46652	1	2066	2	0.0050989	0.27394	0.47905	1	1957	1	0.0050989
CD36	6	0.50091	0.65535	1	2816	2	-0.0084706	0.26883	0.47905	1	1935	2	-0.0084706
FKBP1C	6	0.30513	0.47079	1	2077	1	-0.013795	0.27258	0.47905	1	1950	2	-0.013795
DCD	6	0.68047	0.75215	1	3237	1	-0.025028	0.27268	0.47905	1	1951	2	-0.025028
HKDC1	6	0.13155	0.27055	1	1208	1	-0.028565	0.27002	0.47905	1	1940	1	-0.028565
KLHL22	6	0.48209	0.63767	1	2745	2	-0.032472	0.27196	0.47905	1	1947	2	-0.032472
CST4	6	0.76898	0.78383	1	3450	1	-0.040541	0.27035	0.47905	1	1942	2	-0.040541
CELA2B	6	0.83819	0.84753	1	3695	1	-0.057251	0.27377	0.47905	1	1956	1	-0.057251
SMS	6	0.13178	0.27055	1	1210	3	-0.072884	0.26951	0.47905	1	1937	1	-0.072884
MFGE8	6	0.11715	0.24795	1	1105	3	-0.096073	0.27139	0.47905	1	1945	1	-0.096073
BPIFA2	6	0.10204	0.23237	1	1002	3	-0.11787	0.27348	0.47905	1	1953	2	-0.11787
LRRTM3	6	0.061039	0.1675	1	691	3	-0.13205	0.26968	0.47905	1	1938	1	-0.13205
EPHA6	6	0.0212	0.075885	1	276	4	-0.16555	0.2702	0.47905	1	1941	1	-0.16555
MLYCD	6	0.030914	0.097328	1	380	4	-0.17145	0.26999	0.47905	1	1939	2	-0.17145
TNFSF15	6	0.00498	0.017356	0.983794	96	3	-0.17581	0.27241	0.47905	1	1949	2	-0.17581
MUC2	6	0.80612	0.81011	1	3565	1	0.11528	0.27496	0.47994	1	1961	2	0.11528
TAS1R2	6	0.26821	0.43727	1	1944	2	0.034131	0.2753	0.47994	1	1962	2	0.034131
ENOX1	6	0.95657	0.95788	1	4204	0	0.012479	0.27465	0.47994	1	1959	2	0.012479
CSF2RA	6	0.094321	0.2232	1	946	3	0.00040057	0.27537	0.47994	1	1963	2	0.00040057
ULBP2	6	0.70694	0.7611	1	3296	1	-0.05494	0.27479	0.47994	1	1960	1	-0.05494
GPR37	6	0.024498	0.079755	1	313	3	-0.1531	0.27547	0.47994	1	1964	1	-0.1531
NPSR1	6	0.98174	0.97936	1	4306	0	0.086656	0.27572	0.47995	1	1967	2	0.086656
HTR2A	6	0.72382	0.76792	1	3325	1	0.035216	0.27599	0.47995	1	1970	2	0.035216
HSPA1A	6	0.018121	0.067756	1	244	2	0.026715	0.27572	0.47995	1	1966	1	0.026715
FER	6	0.86704	0.87649	1	3815	0	0.025485	0.27698	0.47995	1	1975	2	0.025485
TYR	6	0.19906	0.38169	1	1658	1	0.021359	0.27648	0.47995	1	1972	1	0.021359
ALDOA	6	0.19314	0.37479	1	1622	2	0.0035164	0.27689	0.47995	1	1974	2	0.0035164
NOTCH4	6	0.8521	0.86453	1	3758	1	0.0011598	0.27635	0.47995	1	1971	2	0.0011598
ME1	6	0.20361	0.38845	1	1690	2	-0.0097075	0.2759	0.47995	1	1968	2	-0.0097075
PLA2G10	6	0.4219	0.55961	1	2529	2	-0.025713	0.27598	0.47995	1	1969	1	-0.025713
IL20RB	6	0.88497	0.89347	1	3884	0	0.092372	0.27801	0.48182	1	1978	2	0.092372
CD84	6	0.67729	0.75215	1	3222	1	0.067687	0.27877	0.48182	1	1981	2	0.067687
TUBB	6	0.40083	0.53537	1	2453	2	0.030762	0.27733	0.48182	1	1976	1	0.030762
SLC6A7	6	0.27851	0.44478	1	1979	2	-0.011159	0.27818	0.48182	1	1979	2	-0.011159
NEU1	6	0.34943	0.49769	1	2240	2	-0.026142	0.27868	0.48182	1	1980	2	-0.026142
IL17C	6	0.081976	0.19643	1	859	3	-0.18543	0.27761	0.48182	1	1977	2	-0.18543
SDR42E2	6	0.89964	0.90585	1	3954	0	0.054583	0.28088	0.48361	1	1988	2	0.054583
HAPLN1	6	0.73251	0.77015	1	3346	1	0.052875	0.28012	0.48361	1	1985	2	0.052875
FCRL2	6	0.83799	0.84753	1	3694	1	0.033726	0.28037	0.48361	1	1986	1	0.033726
COL5A1	6	0.71303	0.76226	1	3308	1	-0.02016	0.27936	0.48361	1	1982	1	-0.02016
LAMA4	6	0.080654	0.1958	1	847	2	-0.033523	0.27987	0.48361	1	1984	1	-0.033523
GABRA4	6	0.51529	0.67156	1	2877	2	-0.036531	0.28054	0.48361	1	1987	1	-0.036531
KCNV1	6	0.10775	0.24246	1	1043	3	-0.070002	0.27958	0.48361	1	1983	2	-0.070002
SLC12A7	6	0.17911	0.35819	1	1525	3	0.0044537	0.28183	0.48447	1	1990	2	0.0044537
COL11A2	6	0.020304	0.073976	1	264	2	-0.091892	0.28155	0.48447	1	1989	1	-0.091892
HTN1	4	0.05721	0.13986	1	663	2	0.0069509	0.3073	0.48574	1	2080	2	0.0069509
ART4	5	0.070559	0.16153	1	772	2	0.10164	0.31193	0.48627	1	2092	2	0.10164
SLC6A16	6	0.054713	0.15926	1	641	1	0.075213	0.283	0.48635	1	1994	2	0.075213
COLEC10	6	0.26812	0.43727	1	1942	2	0.031598	0.28237	0.48635	1	1991	2	0.031598
AKR1A1	6	0.89666	0.90161	1	3939	0	-0.0029911	0.28255	0.48635	1	1992	2	-0.0029911
PRLHR	6	0.11429	0.24581	1	1090	2	-0.012687	0.28273	0.48635	1	1993	2	-0.012687
[truncated: 2,392 more rows]

## Sheet: CAS9-TUN_vs_UNT.sgrna_summary
sgrna	Gene	control_count	treatment_count	control_mean	treat_mean	LFC	control_var	adj_var	score	p.low	p.high	p.twosided	FDR	high_in_treatment
hsLibDrugV1Nik_24142	CAMKV	2.071/0/20.772	36.435/2.15/40.459	2.071	36.435	3.6076	177.01	10.85	10.433	1	1.1975e-25	2.3951e-25	6.5271e-21	TRUE
hsLibDrugV1Nik_25905	MGAM	1.0355/11.85/0	0/23.65/37.424	1.0355	23.65	3.5981	59.01	5.2777	9.8438	1	5.4101e-23	1.082e-22	1.4744e-18	TRUE
hsLibDrugV1Nik_02819	TUBA4A	9.3195/0/0	22.053/4.3/22.252	0.94418	22.053	3.5677	43.426	4.7947	9.6402	1	4.0566e-22	8.1133e-22	7.3701e-18	TRUE
hsLibDrugV1Nik_02825	TGFB3	0/0/29.27	19.177/21.5/27.31	0.94418	21.5	3.5327	428.36	4.7947	9.3875	1	4.6071e-21	9.2142e-21	6.2776e-17	TRUE
hsLibDrugV1Nik_02251	SERPINE2	0/0/0	0/20.425/24.275	0.94418	20.425	3.462	0	4.7947	8.8966	1	4.3192e-19	8.6384e-19	4.7083e-15	TRUE
hsLibDrugV1Nik_00361	PTPN7	1.0355/14.812/0	21.094/23.65/19.218	1.0355	21.094	3.4402	95.434	5.2777	8.7314	1	1.8667e-18	3.7334e-18	1.6957e-14	TRUE
hsLibDrugV1Nik_11137	P3H1	0/0/0	10.547/27.95/19.218	0.94418	19.218	3.3784	0	4.7947	8.3454	1	5.3232e-17	1.0646e-16	4.1448e-13	TRUE
hsLibDrugV1Nik_13356	BSPH1	8.284/0.98748/0	30.682/0/19.218	0.98748	19.218	3.3466	27.107	5.0234	8.1338	1	3.1029e-16	6.2058e-16	2.114e-12	TRUE
hsLibDrugV1Nik_07467	TYK2	0/9.8748/0	12.465/18.275/26.298	0.94418	18.275	3.3095	48.755	4.7947	7.9147	1	1.8585e-15	3.7171e-15	1.1255e-11	TRUE
hsLibDrugV1Nik_21089	PRRT3	5.1775/0.98748/0.94418	15.341/18.275/35.401	0.98748	18.275	3.2777	8.7791	5.0234	7.7131	1	9.1625e-15	1.8325e-14	4.9939e-11	TRUE
hsLibDrugV1Nik_06226	GUCY1A2	0/0.98748/2.8326	0/17.2/20.229	0.98748	17.2	3.1949	2.1897	5.0234	7.2334	1	3.5128e-13	7.0255e-13	1.7405e-09	TRUE
hsLibDrugV1Nik_16445	FCGRT	2.071/3.9499/0	33.559/17.2/25.287	2.071	25.287	3.0976	3.9097	10.85	7.0479	1	1.2349e-12	2.4699e-12	5.6091e-09	TRUE
hsLibDrugV1Nik_22546	CLCA1	0/0/7.5535	24.93/16.125/0	0.94418	16.125	3.1389	28.528	4.7947	6.9328	1	3.0932e-12	6.1863e-12	1.2968e-08	TRUE
hsLibDrugV1Nik_10137	GPR52	31.065/3.9499/3.7767	1.9177/38.7/35.401	3.9499	35.401	2.8785	367.63	21.236	6.8251	1	5.4623e-12	1.0925e-11	2.1265e-08	TRUE
hsLibDrugV1Nik_20302	PHKG2	8.284/0.98748/0	16.3/20.425/9.1032	0.98748	16.3	3.1218	27.107	5.0234	6.832	1	6.2466e-12	1.2493e-11	2.2698e-08	TRUE
hsLibDrugV1Nik_10780	MCHR1	1.0355/0/3.7767	34.518/6.4499/16.183	1.0355	16.183	3.0776	4.2933	5.2777	6.5938	1	3.1815e-11	6.3629e-11	1.0838e-07	TRUE
hsLibDrugV1Nik_15485	EPHX2	0/2.9624/0	15.341/0/15.172	0.94418	15.172	3.0563	4.388	4.7947	6.4977	1	6.1165e-11	1.2233e-10	1.8521e-07	TRUE
hsLibDrugV1Nik_06024	HIST1H4D	0/9.8748/0.94418	20.135/9.6749/15.172	0.94418	15.172	3.0563	40.323	4.7947	6.4977	1	6.1165e-11	1.2233e-10	1.8521e-07	TRUE
hsLibDrugV1Nik_14010	TNFRSF14	0/4.9374/0	1.9177/15.05/24.275	0.94418	15.05	3.0453	12.189	4.7947	6.4419	1	8.8475e-11	1.7695e-10	2.538e-07	TRUE
hsLibDrugV1Nik_21633	SV2C	3.1065/0/6.6093	33.559/29.025/8.0917	3.1065	29.025	2.8702	10.96	16.541	6.3727	1	1.1945e-10	2.3891e-10	3.2554e-07	TRUE
hsLibDrugV1Nik_11453	SERPINI2	4.142/0.98748/0	5.753/30.1/15.172	0.98748	15.172	3.0245	5.463	5.0234	6.3287	1	1.8445e-10	3.689e-10	4.7872e-07	TRUE
hsLibDrugV1Nik_22383	ALDH7A1	0/3.9499/0	0/36.55/14.161	0.94418	14.161	2.9631	7.8009	4.7947	6.0357	1	1.1864e-09	2.3729e-09	2.9393e-06	TRUE
hsLibDrugV1Nik_21846	IGHD	0/1.975/15.107	21.094/27.95/10.115	1.975	21.094	2.8927	88.175	10.327	5.9494	1	1.8416e-09	3.6833e-09	4.1824e-06	TRUE
hsLibDrugV1Nik_23741	SLC29A2	17.603/1.975/1.8884	21.094/30.1/14.161	1.975	21.094	2.8927	122.13	10.327	5.9494	1	1.8416e-09	3.6833e-09	4.1824e-06	TRUE
hsLibDrugV1Nik_06232	CALCA	4.142/0/0	13.424/1.075/15.172	0.94418	13.424	2.8912	8.5781	4.7947	5.6992	1	9.0258e-09	1.8052e-08	1.9678e-05	TRUE
hsLibDrugV1Nik_23920	PAPPA2	479.44/336.73/377.67	419.97/682.62/655.43	377.67	655.43	0.79369	6016	2447.1	5.6149	1	9.8346e-09	1.9669e-08	2.0616e-05	TRUE
hsLibDrugV1Nik_07359	DHODH	14.497/0/0	26.847/4.3/13.149	0.94418	13.149	2.8635	105.08	4.7947	5.5738	1	1.8686e-08	3.7373e-08	3.7721e-05	TRUE
hsLibDrugV1Nik_24715	PRR4	2.071/5.9249/0	7.6706/30.1/20.229	2.071	20.229	2.7893	9.5706	10.85	5.5126	1	2.4044e-08	4.8089e-08	4.6804e-05	TRUE
hsLibDrugV1Nik_11817	SST	4.142/0/0	24.93/12.9/0	0.94418	12.9	2.8378	8.5781	4.7947	5.46	1	3.5697e-08	7.1395e-08	6.7091e-05	TRUE
hsLibDrugV1Nik_09503	VSTM1	1.0355/31.599/0	13.424/13.975/9.1032	1.0355	13.424	2.825	467.61	5.2777	5.3924	1	5.1575e-08	1.0315e-07	9.3702e-05	TRUE
hsLibDrugV1Nik_17641	KMT2A	53.846/77.023/50.986	148.62/198.87/90.02	53.846	148.62	1.4478	272.68	321.87	5.2825	1	6.38e-08	1.276e-07	0.00011217	TRUE
hsLibDrugV1Nik_21897	BRSK2	0/0/0	12.465/13.975/1.0115	0.94418	12.465	2.792	0	4.7947	5.2613	1	1.0725e-07	2.1449e-07	0.00017713	TRUE
hsLibDrugV1Nik_21777	CNTNAP3	12.426/0/0	12.465/0/13.149	0.94418	12.465	2.792	77.202	4.7947	5.2613	1	1.0725e-07	2.1449e-07	0.00017713	TRUE
hsLibDrugV1Nik_10654	GDF5	9.3195/0/0	7.6706/21.5/12.138	0.94418	12.138	2.7565	43.426	4.7947	5.1119	1	2.3915e-07	4.7829e-07	0.00037241	TRUE
hsLibDrugV1Nik_14024	SLC22A13	0/0/0	15.341/0/12.138	0.94418	12.138	2.7565	0	4.7947	5.1119	1	2.3915e-07	4.7829e-07	0.00037241	TRUE
hsLibDrugV1Nik_01150	CA3	239.2/187.62/192.61	366.27/580.49/205.33	192.61	366.27	0.92367	1097.6	1213.5	4.985	1	3.0976e-07	6.1952e-07	0.00046898	TRUE
hsLibDrugV1Nik_14852	BCL2L1	5.1775/0/0	0/11.825/12.138	0.94418	11.825	2.7217	13.403	4.7947	4.9691	1	5.044e-07	1.0088e-06	0.00070491	TRUE
hsLibDrugV1Nik_19923	CD3E	0/4.9374/0	16.3/11.825/0	0.94418	11.825	2.7217	12.189	4.7947	4.9691	1	5.044e-07	1.0088e-06	0.00070491	TRUE
hsLibDrugV1Nik_23759	GIPR	3.1065/0/0	6.7118/11.825/20.229	0.94418	11.825	2.7217	4.8252	4.7947	4.9691	1	5.044e-07	1.0088e-06	0.00070491	TRUE
hsLibDrugV1Nik_05969	PSMB3	201.92/197.5/247.38	230.12/391.3/373.23	201.92	373.23	0.883	1042.8	1274.7	4.7982	1	8.0052e-07	1.601e-06	0.0010908	TRUE
hsLibDrugV1Nik_10512	OR2V2	5.1775/0.98748/28.326	30.682/0/35.401	5.1775	30.682	2.3586	276.69	28.14	4.808	1	9.1224e-07	1.8245e-06	0.0012127	TRUE
hsLibDrugV1Nik_03158	KCNK10	932.98/905.52/1273.7	1379.8/1308.3/1160.2	932.98	1308.3	0.48728	58423	6278.1	4.7363	1	1.0884e-06	2.1767e-06	0.0014124	TRUE
hsLibDrugV1Nik_18929	RYR3	2.071/2.9624/24.549	13.424/21.5/30.344	2.9624	21.5	2.5055	233.38	15.744	4.6719	1	1.9324e-06	3.8648e-06	0.0024494	TRUE
hsLibDrugV1Nik_13219	UCN3	337.57/569.77/457.93	645.29/781.52/710.05	457.93	710.05	0.63168	13497	2991	4.61	1	2.0137e-06	4.0274e-06	0.0024944	TRUE
hsLibDrugV1Nik_26132	BMPR1A	52.81/16.787/13.219	69.994/29.025/61.699	16.787	61.699	1.8176	655.21	95.682	4.5915	1	2.2999e-06	4.5997e-06	0.0027688	TRUE
hsLibDrugV1Nik_06287	PTGDR	99.408/99.735/148.24	212.86/145.12/221.51	99.735	212.86	1.0861	1176.3	611.5	4.5747	1	2.3849e-06	4.7697e-06	0.0027688	TRUE
hsLibDrugV1Nik_12366	IFNGR2	0/0/14.163	29.724/7.5249/11.126	0.94418	11.126	2.6409	100.29	4.7947	4.65	1	2.4892e-06	4.9785e-06	0.0027688	TRUE
hsLibDrugV1Nik_03535	KCNH1	2.071/0/0.94418	0/21.5/11.126	0.94418	11.126	2.6409	1.0806	4.7947	4.65	1	2.4892e-06	4.9785e-06	0.0027688	TRUE
hsLibDrugV1Nik_18293	MYH6	0/0/7.5535	11.506/6.4499/11.126	0.94418	11.126	2.6409	28.528	4.7947	4.65	1	2.4892e-06	4.9785e-06	0.0027688	TRUE
hsLibDrugV1Nik_16243	TNFSF11	414.2/425.6/466.43	680.77/662.19/587.66	425.6	662.19	0.63654	898.36	2771.4	4.4942	1	3.4919e-06	6.9838e-06	0.0038064	TRUE
hsLibDrugV1Nik_01428	FAM20A	1.0355/6.9123/0	11.506/13.975/0	1.0355	11.506	2.6192	17.805	5.2777	4.5577	1	3.8373e-06	7.6747e-06	0.004101	TRUE
hsLibDrugV1Nik_11366	ARAF	676.18/638.9/821.44	1021.2/975.02/724.21	676.18	975.02	0.52736	11245	4489.1	4.4602	1	4.0946e-06	8.1893e-06	0.0042918	TRUE
hsLibDrugV1Nik_19420	CD302	391.42/391.04/634.49	559.96/639.62/614.97	391.42	614.97	0.65047	29542	2539.9	4.4358	1	4.5865e-06	9.1731e-06	0.0047167	TRUE
hsLibDrugV1Nik_00706	GRM6	4.142/32.587/3.7767	12.465/29.025/25.287	4.142	25.287	2.3539	404.62	22.311	4.4766	1	4.6841e-06	9.3682e-06	0.0047278	TRUE
hsLibDrugV1Nik_25347	GH2	719.67/1105/706.25	1024/1159.9/783.89	719.67	1024	0.50825	74324	4790.3	4.3975	0.99999	5.4764e-06	1.0953e-05	0.0052153	TRUE
hsLibDrugV1Nik_10941	AHR	0/0.98748/0	18.218/10.75/0	0.94418	10.75	2.5954	0.48755	4.7947	4.4781	0.99999	5.6455e-06	1.1291e-05	0.0052153	TRUE
hsLibDrugV1Nik_20560	F11	22.781/0/0	3.8353/10.75/13.149	0.94418	10.75	2.5954	259.49	4.7947	4.4781	0.99999	5.6455e-06	1.1291e-05	0.0052153	TRUE
hsLibDrugV1Nik_04223	GABRG3	1.0355/0/0	0.95883/10.75/22.252	0.94418	10.75	2.5954	0.53613	4.7947	4.4781	0.99999	5.6455e-06	1.1291e-05	0.0052153	TRUE
hsLibDrugV1Nik_10958	HSD17B14	0/0/4.7209	13.424/10.75/5.0573	0.94418	10.75	2.5954	11.144	4.7947	4.4781	0.99999	5.6455e-06	1.1291e-05	0.0052153	TRUE
hsLibDrugV1Nik_26314	NonTargetingGuide008	216.42/148.12/164.29	257.92/334.32/304.45	164.29	304.45	0.88596	1489.5	1028.3	4.371	0.99999	6.1849e-06	1.237e-05	0.0056184	TRUE
hsLibDrugV1Nik_18599	TLK1	193.64/150.1/147.29	202.31/282.72/313.55	150.1	282.72	0.90901	951.88	935.95	4.3351	0.99999	7.2838e-06	1.4568e-05	0.0064743	TRUE
hsLibDrugV1Nik_13428	PDE1B	150.15/138.25/212.44	250.25/282.72/288.27	150.15	282.72	0.90852	2011.1	936.28	4.3327	0.99999	7.3647e-06	1.4729e-05	0.0064743	TRUE
hsLibDrugV1Nik_25722	GPR139	1.0355/14.812/0	18.218/10.75/11.126	1.0355	11.126	2.5747	95.434	5.2777	4.3924	0.99999	8.3192e-06	1.6638e-05	0.0070848	TRUE
hsLibDrugV1Nik_07948	PRDX4	1.0355/0/22.66	17.259/9.6749/11.126	1.0355	11.126	2.5747	234.35	5.2777	4.3924	0.99999	8.3192e-06	1.6638e-05	0.0070848	TRUE
hsLibDrugV1Nik_21610	RIPK4	0/0/6.6093	10.547/40.85/0	0.94418	10.547	2.5703	21.841	4.7947	4.3855	0.99999	8.6752e-06	1.735e-05	0.0072743	TRUE
hsLibDrugV1Nik_13146	XYLT1	160.5/154.05/236.05	296.28/326.8/171.95	160.5	296.28	0.88026	2874.3	1003.6	4.2859	0.99999	9.1019e-06	1.8204e-05	0.0075165	TRUE
hsLibDrugV1Nik_21071	MIA	15.532/2.9624/0	20.135/17.2/23.264	2.9624	20.135	2.4152	83.391	15.744	4.328	0.99999	9.7415e-06	1.9483e-05	0.0079246	TRUE
hsLibDrugV1Nik_05034	KHDRBS1	117.01/124.42/124.63	254.09/184.9/242.75	124.42	242.75	0.95862	27.481	769.86	4.2647	0.99999	1.0008e-05	2.0016e-05	0.0080218	TRUE
hsLibDrugV1Nik_27014	NonTargetingGuide708	326.18/218.23/263.43	448.73/267.67/437.96	263.43	437.96	0.73123	2990.4	1681.4	4.2565	0.99999	1.0384e-05	2.0768e-05	0.008181	TRUE
hsLibDrugV1Nik_05857	CNGA1	307.54/220.21/222.83	388.33/382.7/322.66	222.83	382.7	0.77758	3591.8	1412.4	4.2538	0.99999	1.0507e-05	2.1014e-05	0.008181	TRUE
hsLibDrugV1Nik_10783	MCHR1	192.6/202.43/188.84	347.1/279.5/339.85	192.6	339.85	0.81605	55.403	1213.5	4.2271	0.99999	1.1838e-05	2.3675e-05	0.0090543	TRUE
hsLibDrugV1Nik_22709	ST3GAL4	61.094/66.161/112.36	150.54/94.599/174.98	66.161	150.54	1.174	1079.9	398.85	4.2248	0.99999	1.1961e-05	2.3922e-05	0.0090543	TRUE
hsLibDrugV1Nik_05855	CNGA1	655.47/534.22/468.32	588.72/793.34/783.89	534.22	783.89	0.55234	9522.3	3511.9	4.2129	0.99999	1.2605e-05	2.521e-05	0.0094111	TRUE
hsLibDrugV1Nik_14724	SLCO1C1	738.31/647.78/661.87	939.65/715.94/1010.5	661.87	939.65	0.50493	3020.6	4390.2	4.1923	0.99999	1.3804e-05	2.7609e-05	0.010168	TRUE
hsLibDrugV1Nik_25424	F2RL3	245.41/158/156.73	314.5/180.6/289.28	158	289.28	0.86845	3821.7	987.3	4.1781	0.99999	1.4695e-05	2.939e-05	0.010679	TRUE
hsLibDrugV1Nik_06298	GRK1	0/0.98748/3.7767	10.547/6.4499/11.126	0.98748	10.547	2.5385	4.3775	5.0234	4.2652	0.99999	1.4899e-05	2.9797e-05	0.010685	TRUE
hsLibDrugV1Nik_11460	LEFTY2	0/15.8/1.8884	18.218/0/15.172	1.8884	15.172	2.4852	98.544	9.8571	4.231	0.99998	1.6018e-05	3.2036e-05	0.011313	TRUE
hsLibDrugV1Nik_17743	BMP8B	569.52/528.3/517.41	786.24/772.92/493.6	528.3	772.92	0.54809	908.99	3471.3	4.1518	0.99998	1.649e-05	3.298e-05	0.011313	TRUE
hsLibDrugV1Nik_21672	NR2E1	31.065/20.737/56.651	21.094/106.42/86.986	31.065	86.986	1.4563	380.66	181.56	4.1502	0.99998	1.6788e-05	3.3577e-05	0.011313	TRUE
hsLibDrugV1Nik_04659	TRAC	553.99/645.81/601.45	521.6/900.84/862.78	601.45	862.78	0.51983	2110	3973.4	4.1459	0.99998	1.6926e-05	3.3853e-05	0.011313	TRUE
hsLibDrugV1Nik_18833	HUNK	356.21/476.95/362.57	316.41/563.29/572.49	362.57	563.29	0.63423	6562	2345.2	4.1449	0.99998	1.6995e-05	3.3991e-05	0.011313	TRUE
hsLibDrugV1Nik_15470	C1R	1.0355/6.9123/0	9.5883/10.75/12.138	1.0355	10.75	2.5292	17.805	5.2777	4.2286	0.99998	1.7448e-05	3.4895e-05	0.011313	TRUE
hsLibDrugV1Nik_09001	FCN2	1.0355/0/10.386	16.3/10.75/0	1.0355	10.75	2.5292	44.252	5.2777	4.2286	0.99998	1.7448e-05	3.4895e-05	0.011313	TRUE
hsLibDrugV1Nik_01033	IGFALS	1.0355/0/10.386	18.218/10.75/4.0459	1.0355	10.75	2.5292	44.252	5.2777	4.2286	0.99998	1.7448e-05	3.4895e-05	0.011313	TRUE
hsLibDrugV1Nik_13727	TRPV2	1010.6/1167.2/973.45	1183.2/1365.2/1352.3	1010.6	1352.3	0.41981	12946	6823.6	4.1364	0.99998	1.7644e-05	3.5287e-05	0.011313	TRUE
hsLibDrugV1Nik_18359	TNF	15.532/7.8998/3.7767	9.5883/40.85/35.401	7.8998	35.401	2.0321	37.629	43.673	4.1615	0.99998	1.7881e-05	3.5761e-05	0.011332	TRUE
hsLibDrugV1Nik_12601	GRK4	305.47/283.41/369.18	482.29/488.05/491.57	305.47	488.05	0.67421	2272.6	1961.8	4.122	0.99998	1.8782e-05	3.7563e-05	0.011766	TRUE
hsLibDrugV1Nik_06066	ITGB4	815.97/500.65/640.16	1071/908.37/687.8	640.16	908.37	0.50418	25187	4240.2	4.1189	0.99998	1.9036e-05	3.8072e-05	0.01179	TRUE
hsLibDrugV1Nik_03795	RNASE9	263.02/383.14/272.87	463.11/443.97/305.46	272.87	443.97	0.70022	6128.4	1744.2	4.0968	0.99998	2.0941e-05	4.1881e-05	0.012499	TRUE
hsLibDrugV1Nik_19687	FRZB	0/0/7.5535	7.6706/10.75/10.115	0.94418	10.115	2.5152	28.528	4.7947	4.188	0.99998	2.1097e-05	4.2194e-05	0.012499	TRUE
hsLibDrugV1Nik_16737	IGLV2-18	5.1775/0/0	2.8765/49.449/10.115	0.94418	10.115	2.5152	13.403	4.7947	4.188	0.99998	2.1097e-05	4.2194e-05	0.012499	TRUE
hsLibDrugV1Nik_12460	LOXL1	4.142/0/0	3.8353/17.2/10.115	0.94418	10.115	2.5152	8.5781	4.7947	4.188	0.99998	2.1097e-05	4.2194e-05	0.012499	TRUE
hsLibDrugV1Nik_08156	ITGA6	779.73/869.97/779.9	741.17/1091.1/1075.2	779.9	1075.2	0.46273	4056.3	5208.7	4.0915	0.99998	2.1426e-05	4.2851e-05	0.012557	TRUE
hsLibDrugV1Nik_07456	RORA	361.39/338.7/495.7	559/580.49/424.82	361.39	559	0.62788	9276.6	2337.3	4.0874	0.99998	2.1808e-05	4.3616e-05	0.012645	TRUE
hsLibDrugV1Nik_24173	KCNA6	86.982/156.02/87.809	234.91/79.549/182.06	87.809	182.06	1.0436	2326.8	535.56	4.0729	0.99998	2.3221e-05	4.6442e-05	0.013244	TRUE
hsLibDrugV1Nik_14094	SLCO4A1	391.42/211.32/201.11	425.72/360.12/290.29	211.32	360.12	0.76624	16270	1336.5	4.0702	0.99998	2.3485e-05	4.6969e-05	0.013244	TRUE
hsLibDrugV1Nik_21503	ENPP5	549.85/550.02/710.97	794.87/797.64/724.21	550.02	794.87	0.53041	12952	3620.1	4.0694	0.99998	2.357e-05	4.714e-05	0.013244	TRUE
hsLibDrugV1Nik_20808	SLC6A6	372.78/505.59/325.74	572.42/492.34/674.65	372.78	572.42	0.61741	9925.2	2414	4.0633	0.99998	2.4193e-05	4.8387e-05	0.013455	TRUE
hsLibDrugV1Nik_06423	WFIKKN1	164.64/125.41/137.85	259.84/255.85/213.42	137.85	255.85	0.88737	436.34	856.57	4.0317	0.99997	2.7688e-05	5.5376e-05	0.015244	TRUE
hsLibDrugV1Nik_21156	LYZL1	667.9/483.86/388.06	652/709.49/725.22	483.86	709.49	0.55124	21523	3167.7	4.0089	0.99997	3.05e-05	6.1001e-05	0.016208	TRUE
hsLibDrugV1Nik_00951	CHIT1	151.18/166.88/233.21	194.64/307.45/296.36	166.88	296.36	0.82475	2323.1	1045.2	4.0049	0.99997	3.1025e-05	6.2051e-05	0.016208	TRUE
hsLibDrugV1Nik_11685	CHST10	431.8/533.24/432.44	680.77/644.99/595.75	432.44	644.99	0.5757	5080.6	2817.8	4.0043	0.99997	3.1104e-05	6.2209e-05	0.016208	TRUE
hsLibDrugV1Nik_07183	SBK3	232.99/229.09/369.18	291.48/387/411.67	232.99	387	0.72961	9281.3	1479.6	4.0039	0.99997	3.1157e-05	6.2314e-05	0.016208	TRUE
hsLibDrugV1Nik_18433	MELTF	319.97/175.77/166.18	308.74/211.77/311.53	175.77	308.74	0.80919	10443	1103.2	4.0034	0.99997	3.1224e-05	6.2447e-05	0.016208	TRUE
hsLibDrugV1Nik_23584	BTNL8	1.0355/1.975/3.7767	8.6295/15.05/37.424	1.975	15.05	2.4316	2.0645	10.327	4.0686	0.99997	3.2373e-05	6.4747e-05	0.016646	TRUE
hsLibDrugV1Nik_03695	KRT8	510.5/557.92/522.13	545.57/755.72/771.75	522.13	755.72	0.53257	708.12	3429.1	3.9889	0.99997	3.3193e-05	6.6386e-05	0.016908	TRUE
hsLibDrugV1Nik_05109	SRD5A1	955.76/692.22/773.29	828.43/1093.3/1058	773.29	1058	0.45175	19935	5162.7	3.9624	0.99996	3.71e-05	7.4201e-05	0.018723	TRUE
hsLibDrugV1Nik_18430	MELTF	234.02/144.17/154.85	382.57/277.35/232.64	154.85	277.35	0.83676	3191.4	966.81	3.9397	0.99996	4.0785e-05	8.1569e-05	0.020394	TRUE
hsLibDrugV1Nik_01141	ROR1	454.58/646.8/473.04	691.31/568.67/699.93	473.04	691.31	0.54643	15267	3093.9	3.9243	0.99996	4.3495e-05	8.6991e-05	0.021552	TRUE
hsLibDrugV1Nik_18908	NR1H2	264.05/229.09/313.47	430.51/317.12/424.82	264.05	424.82	0.68395	1832.1	1685.6	3.9157	0.99995	4.5063e-05	9.0127e-05	0.022019	TRUE
hsLibDrugV1Nik_17682	GABRA1	157.4/200.46/341.79	365.31/339.7/265	200.46	339.7	0.75801	10915	1265.1	3.9148	0.99995	4.5247e-05	9.0494e-05	0.022019	TRUE
hsLibDrugV1Nik_15157	CFTR	2.071/8.8873/0.94418	23.012/3.225/15.172	2.071	15.172	2.3967	23.866	10.85	3.9773	0.99995	4.7407e-05	9.4814e-05	0.022666	TRUE
hsLibDrugV1Nik_02723	TDGF1	2.071/0.98748/14.163	6.7118/22.575/15.172	2.071	15.172	2.3967	73.692	10.85	3.9773	0.99995	4.7407e-05	9.4814e-05	0.022666	TRUE
hsLibDrugV1Nik_18181	MAPK14	397.63/325.87/289.86	504.34/341.85/526.97	325.87	504.34	0.62856	3223.1	2098.5	3.8961	0.99995	4.8875e-05	9.7749e-05	0.022959	TRUE
hsLibDrugV1Nik_16019	ABCC4	0/0/11.33	0/9.6749/10.115	0.94418	9.6749	2.457	64.187	4.7947	3.9872	0.99995	5.0127e-05	0.00010025	0.022959	TRUE
hsLibDrugV1Nik_03401	IFNL2	0/1.975/0.94418	3.8353/9.6749/37.424	0.94418	9.6749	2.457	0.97698	4.7947	3.9872	0.99995	5.0127e-05	0.00010025	0.022959	TRUE
hsLibDrugV1Nik_12098	IGFBPL1	5.1775/0/0	0/9.6749/10.115	0.94418	9.6749	2.457	13.403	4.7947	3.9872	0.99995	5.0127e-05	0.00010025	0.022959	TRUE
hsLibDrugV1Nik_09626	NPVF	0/8.8873/0	15.341/9.6749/8.0917	0.94418	9.6749	2.457	39.492	4.7947	3.9872	0.99995	5.0127e-05	0.00010025	0.022959	TRUE
hsLibDrugV1Nik_06358	QSOX2	180.18/186.63/268.15	245.46/447.2/319.62	186.63	319.62	0.77297	3343.2	1174.3	3.8808	0.99995	5.2049e-05	0.0001041	0.023619	TRUE
hsLibDrugV1Nik_15409	PTPRF	442.16/486.83/461.71	682.69/674.02/551.25	461.71	674.02	0.54483	506.56	3016.7	3.8655	0.99994	5.5427e-05	0.00011085	0.024762	TRUE
hsLibDrugV1Nik_19497	FCAR	5.1775/12.837/0.94418	25.888/0/29.333	5.1775	25.888	2.1219	38.296	28.14	3.9043	0.99994	5.6562e-05	0.00011312	0.025064	TRUE
hsLibDrugV1Nik_11812	NEK3	0/20.737/0.94418	9.5883/0/10.115	0.94418	9.5883	2.4452	196.32	4.7947	3.9477	0.99994	5.9175e-05	0.00011835	0.02601	TRUE
hsLibDrugV1Nik_10997	IGLV3-25	326.18/349.57/325.74	502.43/534.27/437.96	326.18	502.43	0.62169	273.51	2100.6	3.8454	0.99994	6.0168e-05	0.00012034	0.026146	TRUE
hsLibDrugV1Nik_24842	TUBB4B	666.86/751.47/793.12	1055.7/722.39/1023.6	751.47	1023.6	0.44536	4446.5	5011	3.8443	0.99994	6.0443e-05	0.00012089	0.026146	TRUE
hsLibDrugV1Nik_22218	COL4A2	131.51/156.02/138.8	198.48/251.55/267.03	138.8	251.55	0.85324	174.92	862.68	3.8388	0.99994	6.1807e-05	0.00012361	0.026526	TRUE
hsLibDrugV1Nik_00459	HSD11B2	0/6.9123/1.8884	15.341/13.975/14.161	1.8884	14.161	2.392	14.403	9.8571	3.9088	0.99994	6.3852e-05	0.0001277	0.027048	TRUE
hsLibDrugV1Nik_11737	GH1	918.49/1190.9/974.4	1284.8/1166.4/1326	974.4	1284.8	0.39864	24999	6568.8	3.8302	0.99994	6.4017e-05	0.00012803	0.027048	TRUE
hsLibDrugV1Nik_23464	P2RX1	8.284/6.9123/22.66	35.477/31.175/34.39	8.284	34.39	1.9305	104.28	45.884	3.8539	0.99993	6.5348e-05	0.0001307	0.027075	TRUE
hsLibDrugV1Nik_21659	IL15	18.639/0/3.7767	20.135/24.725/21.241	3.7767	21.241	2.2191	117.57	20.268	3.8792	0.99993	6.5571e-05	0.00013114	0.027075	TRUE
hsLibDrugV1Nik_04254	MTNR1A	427.66/506.58/467.37	679.81/678.32/455.16	467.37	678.32	0.53643	1556.9	3055.3	3.8163	0.99993	6.7723e-05	0.00013545	0.027753	TRUE
hsLibDrugV1Nik_23453	ULK3	317.9/298.22/413.55	520.64/399.9/489.55	317.9	489.55	0.6213	4768.6	2045	3.7958	0.99993	7.3597e-05	0.00014719	0.029935	TRUE
hsLibDrugV1Nik_27269	NonTargetingGuide963	517.75/472.01/601.45	738.3/654.67/790.97	517.75	738.3	0.51112	4548.4	3399.1	3.7829	0.99992	7.7516e-05	0.00015503	0.031296	TRUE
hsLibDrugV1Nik_24831	VWC2	140.83/209.34/157.68	341.34/240.8/276.13	157.68	276.13	0.80445	1476.7	985.24	3.7737	0.99992	8.0417e-05	0.00016083	0.032228	TRUE
hsLibDrugV1Nik_09348	TRAV8-4	1.0355/12.837/1.8884	0/13.975/25.287	1.8884	13.975	2.3742	60.302	9.8571	3.8497	0.99992	8.1423e-05	0.00016285	0.032393	TRUE
hsLibDrugV1Nik_17823	TIMP2	492.9/482.88/520.25	706.66/569.74/717.13	492.9	706.66	0.51884	424.19	3229.3	3.7616	0.99992	8.4425e-05	0.00016885	0.033344	TRUE
hsLibDrugV1Nik_18553	EGLN1	89.053/73.073/74.591	154.37/163.4/105.19	74.591	154.37	1.0394	105.73	451.89	3.753	0.99991	8.7375e-05	0.00017475	0.034261	TRUE
hsLibDrugV1Nik_07188	ENDOU	5.1775/18.762/8.4977	40.271/7.5249/34.39	8.4977	34.39	1.8977	58.19	47.116	3.7721	0.99991	9.0728e-05	0.00018146	0.035322	TRUE
hsLibDrugV1Nik_26974	NonTargetingGuide668	10.355/0.98748/0	9.5883/0/19.218	0.98748	9.5883	2.4135	44.363	5.0234	3.8374	0.99991	9.2756e-05	0.00018551	0.035855	TRUE
hsLibDrugV1Nik_20899	ADAMTS9	659.61/747.52/678.87	726.79/1101.9/929.54	678.87	929.54	0.45281	2541.8	4507.7	3.7336	0.99991	9.4397e-05	0.00018879	0.036149	TRUE
hsLibDrugV1Nik_13264	MET	411.09/377.22/433.38	604.06/432.15/672.62	411.09	604.06	0.55411	822.2	2673	3.7324	0.99991	9.4842e-05	0.00018968	0.036149	TRUE
hsLibDrugV1Nik_23674	G6PC	219.53/260.69/341.79	264.64/457.95/412.68	260.69	412.68	0.66063	4136.1	1663.2	3.7267	0.9999	9.7014e-05	0.00019403	0.036332	TRUE
hsLibDrugV1Nik_27283	NonTargetingGuide977	280.62/310.07/319.13	338.47/482.67/476.4	310.07	476.4	0.61797	474.68	1992.6	3.7262	0.9999	9.718e-05	0.00019436	0.036332	TRUE
hsLibDrugV1Nik_07985	THSD4	133.58/115.53/111.41	226.28/215/145.65	115.53	215	0.89026	171.29	712.68	3.7258	0.9999	9.7365e-05	0.00019473	0.036332	TRUE
hsLibDrugV1Nik_04819	ST3GAL2	334.47/316.98/399.39	518.73/507.39/356.04	334.47	507.39	0.59978	2260.5	2156.2	3.7241	0.9999	9.7989e-05	0.00019598	0.036332	TRUE
hsLibDrugV1Nik_16860	SIRT1	25.887/1.975/0	7.6706/15.05/14.161	1.975	14.161	2.3494	287.85	10.327	3.7918	0.9999	0.00010234	0.00020468	0.03739	TRUE
hsLibDrugV1Nik_00406	KCNA4	153.25/173.8/240.77	168.75/311.75/296.36	173.8	296.36	0.76654	2453.6	1090.3	3.7118	0.9999	0.0001029	0.0002058	0.03739	TRUE
hsLibDrugV1Nik_12478	HTR3D	797.33/889.72/806.33	1078.7/778.29/1114.6	806.33	1078.7	0.41937	3516.8	5392.8	3.7087	0.9999	0.00010418	0.00020836	0.037604	TRUE
hsLibDrugV1Nik_26408	NonTargetingGuide102	240.24/297.23/231.33	323.12/407.42/384.36	240.24	384.36	0.67575	1663.9	1527.5	3.6875	0.99989	0.00011323	0.00022645	0.040601	TRUE
hsLibDrugV1Nik_03306	KLHL7	293.05/297.23/274.76	247.38/452.57/460.22	293.05	452.57	0.62528	175.98	1878.8	3.6804	0.99988	0.00011646	0.00023291	0.041486	TRUE
hsLibDrugV1Nik_17050	SLC13A3	299.26/379.19/303.08	302.99/495.57/465.27	303.08	465.27	0.61671	2903.5	1945.9	3.6768	0.99988	0.00011808	0.00023616	0.041792	TRUE
hsLibDrugV1Nik_22082	PRG2	444.23/449.3/529.69	648.17/498.79/688.81	449.3	648.17	0.5277	3243.8	2932.3	3.6724	0.99988	0.00012012	0.00024024	0.041969	TRUE
hsLibDrugV1Nik_10533	KCNK16	889.49/621.12/647.71	887.87/949.22/849.63	647.71	887.87	0.4544	29583	4292.3	3.6657	0.99988	0.00012332	0.00024663	0.042811	TRUE
hsLibDrugV1Nik_07580	GSTM4	225.74/231.07/353.13	371.07/258/376.27	231.07	371.07	0.681	7463	1466.9	3.6553	0.99987	0.00012844	0.00025689	0.044308	TRUE
hsLibDrugV1Nik_18155	LIMK2	238.16/242.92/237.93	424.76/326.8/380.31	238.16	380.31	0.67297	11.329	1513.8	3.6534	0.99987	0.00012938	0.00025877	0.044352	TRUE
hsLibDrugV1Nik_07474	TUBG1	266.12/425.6/289.86	547.49/447.2/316.59	289.86	447.2	0.62378	9494.1	1857.5	3.6504	0.99987	0.0001309	0.00026179	0.04459	TRUE
hsLibDrugV1Nik_18229	TAB1	4.142/0.98748/2.8326	0.95883/17.2/29.333	2.8326	17.2	2.2475	2.5595	15.027	3.7063	0.99986	0.00013701	0.00027402	0.045737	TRUE
hsLibDrugV1Nik_03317	ADAMTS16	228.85/220.21/313.47	367.23/384.85/269.05	228.85	367.23	0.67995	3617.9	1452.2	3.6315	0.99986	0.0001409	0.0002818	0.045737	TRUE
hsLibDrugV1Nik_13611	SMC3	35.207/111.58/52.874	44.106/120.4/117.33	52.874	117.33	1.1351	1879.5	315.83	3.6269	0.99986	0.00014363	0.00028726	0.045737	TRUE
hsLibDrugV1Nik_19596	PSEN1	4.142/22.712/16.051	50.818/56.974/34.39	16.051	50.818	1.6036	93.097	91.321	3.6381	0.99986	0.00014401	0.00028801	0.045737	TRUE
hsLibDrugV1Nik_22617	ACVRL1	367.6/500.65/386.17	570.5/567.59/391.44	386.17	567.59	0.55443	6725.1	2504.4	3.6252	0.99986	0.00014435	0.0002887	0.045737	TRUE
hsLibDrugV1Nik_25192	CALR	0/0/0	18.218/7.5249/9.1032	0.94418	9.1032	2.3776	0	4.7947	3.7261	0.99985	0.0001458	0.0002916	0.045737	TRUE
hsLibDrugV1Nik_03550	CASP8	0/4.9374/0.94418	7.6706/11.825/9.1032	0.94418	9.1032	2.3776	8.4185	4.7947	3.7261	0.99985	0.0001458	0.0002916	0.045737	TRUE
hsLibDrugV1Nik_07659	CYP1A2	0/0.98748/0	0/18.275/9.1032	0.94418	9.1032	2.3776	0.48755	4.7947	3.7261	0.99985	0.0001458	0.0002916	0.045737	TRUE
hsLibDrugV1Nik_08784	INHBE	0/0/0	4.7941/15.05/9.1032	0.94418	9.1032	2.3776	0	4.7947	3.7261	0.99985	0.0001458	0.0002916	0.045737	TRUE
hsLibDrugV1Nik_12654	SLC47A1	0/0/0	0/10.75/9.1032	0.94418	9.1032	2.3776	0	4.7947	3.7261	0.99985	0.0001458	0.0002916	0.045737	TRUE
hsLibDrugV1Nik_05443	PLA2G15	622.33/498.68/507.03	727.75/715.94/465.27	507.03	715.94	0.49695	6682.8	3325.8	3.6226	0.99985	0.00014582	0.00029164	0.045737	TRUE
hsLibDrugV1Nik_13375	CHRNB4	341.71/318.95/459.82	368.19/551.47/511.8	341.71	511.8	0.58139	7233.2	2204.9	3.6223	0.99985	0.00014601	0.00029202	0.045737	TRUE
hsLibDrugV1Nik_14817	PTGIR	0/27.649/4.7209	0.95883/32.25/23.264	4.7209	23.264	2.0845	274	25.563	3.6675	0.99985	0.00014849	0.00029698	0.046248	TRUE
hsLibDrugV1Nik_12411	APOO	938.16/787.02/805.39	1137.2/940.62/1070.1	805.39	1070.1	0.40959	8983	5386.2	3.6073	0.99985	0.00015471	0.00030942	0.047689	TRUE
hsLibDrugV1Nik_26749	NonTargetingGuide443	395.56/488.8/351.24	585.84/578.34/485.5	395.56	578.34	0.54688	5329.2	2567.9	3.607	0.99985	0.00015487	0.00030974	0.047689	TRUE
hsLibDrugV1Nik_06327	GUSB	246.45/302.17/215.27	350.93/389.15/469.32	246.45	389.15	0.65689	2038.2	1568.7	3.6029	0.99984	0.00015737	0.00031474	0.048187	TRUE
hsLibDrugV1Nik_08071	CEACAM16	246.45/363.39/260.59	355.73/407.42/411.67	260.59	407.42	0.64272	5383.6	1662.6	3.6009	0.99984	0.00015857	0.00031713	0.048282	TRUE
hsLibDrugV1Nik_13081	PXDN	354.14/174.78/231.33	488.04/295.62/369.19	231.33	369.19	0.6721	9140.3	1468.6	3.5974	0.99984	0.00016069	0.00032139	0.048573	TRUE
hsLibDrugV1Nik_26066	CHRNB1	197.78/196.51/363.51	239.71/327.87/324.68	197.78	324.68	0.71228	13734	1247.5	3.5929	0.99984	0.00016349	0.00032698	0.048573	TRUE
hsLibDrugV1Nik_15726	TTK	619.23/719.87/841.27	1045.1/968.57/821.31	719.87	968.57	0.4276	12433	4791.7	3.5927	0.99984	0.00016362	0.00032724	0.048573	TRUE
hsLibDrugV1Nik_17587	BCL2L2	186.39/265.63/223.77	462.16/319.27/359.07	223.77	359.07	0.67982	1574.8	1418.7	3.5922	0.99984	0.00016398	0.00032796	0.048573	TRUE
hsLibDrugV1Nik_18851	BCL2L2-PABPN1	186.39/265.63/223.77	462.16/319.27/359.07	223.77	359.07	0.67982	1574.8	1418.7	3.5922	0.99984	0.00016398	0.00032796	0.048573	TRUE
hsLibDrugV1Nik_14921	TUFT1	293.05/227.12/197.33	386.41/363.35/214.43	227.12	363.35	0.67552	2616.7	1440.8	3.5889	0.99983	0.00016601	0.00033203	0.04891	TRUE
hsLibDrugV1Nik_17993	CD247	341.71/323.89/439.99	510.1/284.87/570.47	341.71	510.1	0.57659	4987.9	2204.9	3.586	0.99983	0.00016792	0.00033584	0.049206	TRUE
hsLibDrugV1Nik_07610	TNFRSF12A	443.19/450.29/599.56	647.21/456.87/644.3	450.29	644.3	0.51593	11166	2939	3.5788	0.99983	0.00017262	0.00034523	0.050311	TRUE
hsLibDrugV1Nik_27143	NonTargetingGuide837	248.52/204.41/389	390.24/397.75/237.69	248.52	390.24	0.64891	10841	1582.4	3.5627	0.99982	0.00018353	0.00036706	0.053208	TRUE
hsLibDrugV1Nik_10034	DHRS9	382.1/569.77/367.29	606.94/505.24/559.34	382.1	559.34	0.54859	17721	2476.9	3.5613	0.99982	0.00018451	0.00036902	0.053209	TRUE
hsLibDrugV1Nik_11931	SLC5A6	586.09/483.86/474.92	688.44/683.69/519.89	483.86	683.69	0.49788	5265.3	3167.7	3.5505	0.99981	0.00019225	0.00038449	0.055148	TRUE
hsLibDrugV1Nik_05309	RETNLB	300.29/291.31/339.91	358.6/455.8/461.23	300.29	455.8	0.60037	824.96	1927.2	3.5422	0.9998	0.00019843	0.00039686	0.056624	TRUE
hsLibDrugV1Nik_00030	MMP26	615.09/690.25/538.19	840.89/687.99/879.98	615.09	840.89	0.4505	5781.3	4067.3	3.5406	0.9998	0.00019959	0.00039917	0.056658	TRUE
hsLibDrugV1Nik_11293	XCL1	299.26/166.88/187.89	318.33/137.6/309.51	187.89	309.51	0.71707	6421.9	1182.6	3.5365	0.9998	0.00020273	0.00040547	0.057073	TRUE
hsLibDrugV1Nik_07365	CEACAM7	210.21/390.05/236.05	372.98/389.15/341.88	236.05	372.98	0.65781	12193	1499.8	3.536	0.9998	0.00020315	0.00040629	0.057073	TRUE
hsLibDrugV1Nik_00592	ABCC2	776.62/552/552.35	590.64/792.27/764.67	552.35	764.67	0.46853	25150	3636.1	3.5211	0.99979	0.0002149	0.00042981	0.060067	TRUE
hsLibDrugV1Nik_00919	GRM7	3.1065/0/1.8884	14.382/0/13.149	1.8884	13.149	2.2924	2.5249	9.8571	3.5867	0.99977	0.00023059	0.00046118	0.06399	TRUE
hsLibDrugV1Nik_00637	DLL4	322.04/443.38/307.8	491.88/240.8/481.46	322.04	481.46	0.57869	7462.6	2072.8	3.5015	0.99977	0.00023129	0.00046257	0.06399	TRUE
hsLibDrugV1Nik_10389	SLC6A8	39.349/3.9499/5.6651	12.465/63.424/25.287	5.6651	25.287	1.9796	568.77	30.901	3.5297	0.99975	0.00024586	0.00049172	0.067679	TRUE
hsLibDrugV1Nik_24979	MYLK2	218.49/227.12/267.2	306.82/397.75/359.07	227.12	359.07	0.65849	840.63	1440.8	3.4763	0.99975	0.0002542	0.00050841	0.06898	TRUE
hsLibDrugV1Nik_19062	TKT	340.68/457.2/343.68	567.63/507.39/450.1	343.68	507.39	0.56068	6447.7	2218.1	3.4761	0.99975	0.0002544	0.0005088	0.06898	TRUE
hsLibDrugV1Nik_19853	CCL26	702.07/674.45/803.5	652/939.54/1063.1	702.07	939.54	0.41983	5525.8	4668.3	3.4756	0.99975	0.00025482	0.00050964	0.06898	TRUE
hsLibDrugV1Nik_26896	NonTargetingGuide590	132.54/118.5/122.74	248.34/134.37/218.48	122.74	218.48	0.82671	57.036	759.05	3.4748	0.99974	0.00025565	0.0005113	0.06898	TRUE
hsLibDrugV1Nik_24384	GLO1	307.54/163.92/224.72	415.17/355.82/274.11	224.72	355.82	0.66069	5278.2	1424.9	3.4732	0.99974	0.00025714	0.00051429	0.069041	TRUE
hsLibDrugV1Nik_00666	HSD3B7	1032.4/1328.2/1110.4	1457.4/1411.5/1162.2	1110.4	1411.5	0.34588	26757	7526.5	3.4707	0.99974	0.00025959	0.00051917	0.069355	TRUE
hsLibDrugV1Nik_10151	CYP4A22	638.9/721.84/670.37	901.3/916.97/722.19	670.37	901.3	0.42649	1819.9	4448.9	3.4622	0.99973	0.00026792	0.00053585	0.070631	TRUE
hsLibDrugV1Nik_00895	UCN2	372.78/333.77/466.43	395.04/542.87/605.87	372.78	542.87	0.54107	5145.9	2414	3.4618	0.99973	0.00026825	0.0005365	0.070631	TRUE
hsLibDrugV1Nik_10319	CYP2J2	119.08/247.86/97.251	212.86/187.05/236.68	119.08	212.86	0.83264	8529.7	735.48	3.4579	0.99973	0.00027221	0.00054441	0.071067	TRUE
hsLibDrugV1Nik_20660	DHRS7B	454.58/336.73/362.57	545.57/334.32/530.01	362.57	530.01	0.54651	4567.3	2345.2	3.4576	0.99973	0.00027251	0.00054503	0.071067	TRUE
hsLibDrugV1Nik_08087	EYS	493.93/429.55/375.79	516.81/617.04/611.94	429.55	611.94	0.50955	3517.9	2798.2	3.4479	0.99972	0.00028251	0.00056502	0.073323	TRUE
hsLibDrugV1Nik_15945	BCL2L10	621.3/410.79/424.88	605.98/643.92/572.49	424.88	605.98	0.51119	19389	2766.5	3.4431	0.99971	0.00028759	0.00057519	0.074289	TRUE
hsLibDrugV1Nik_08005	HSP90B1	390.38/484.85/392.78	539.82/594.47/566.42	392.78	566.42	0.52703	4241.3	2549.1	3.4392	0.99971	0.00029173	0.00058346	0.075003	TRUE
hsLibDrugV1Nik_05605	TAOK1	557.1/682.35/514.58	765.14/768.62/706	557.1	765.14	0.4571	8747.4	3668.7	3.4348	0.9997	0.00029645	0.0005929	0.075858	TRUE
hsLibDrugV1Nik_16867	ESR1	671/682.35/947.02	912.8/827.74/966.96	682.35	912.8	0.41927	35090	4531.7	3.4234	0.99969	0.00030919	0.00061839	0.078383	TRUE
hsLibDrugV1Nik_12445	CTRB1	6.213/0.98748/1.8884	12.465/12.9/26.298	1.8884	12.9	2.2667	9.757	9.8571	3.5073	0.99969	0.00031166	0.00062332	0.078642	TRUE
hsLibDrugV1Nik_23816	CACNG6	3.1065/19.75/9.4418	13.424/35.475/34.39	9.4418	34.39	1.761	73.192	52.575	3.4407	0.99968	0.00032107	0.00064215	0.080274	TRUE
hsLibDrugV1Nik_20974	CD300LB	424.55/456.21/398.45	700.9/436.45/603.85	424.55	603.85	0.50722	841.99	2764.3	3.4101	0.99968	0.00032469	0.00064938	0.080729	TRUE
hsLibDrugV1Nik_05156	NPFFR1	188.46/244.89/342.74	428.6/379.47/368.17	244.89	379.47	0.62975	6379.2	1558.4	3.409	0.99967	0.00032595	0.0006519	0.080729	TRUE
hsLibDrugV1Nik_02203	SCRG1	245.41/192.56/193.56	312.58/341.85/183.08	193.56	312.58	0.68862	1345	1219.7	3.4079	0.99967	0.00032733	0.00065467	0.080729	TRUE
hsLibDrugV1Nik_04037	ABCB7	33.136/0/0.94418	8.6295/16.125/0	0.94418	8.6295	2.3083	518.6	4.7947	3.5098	0.99966	0.00033629	0.00067257	0.080868	TRUE
hsLibDrugV1Nik_09222	ACKR1	3.1065/0/0.94418	8.6295/0/20.229	0.94418	8.6295	2.3083	2.7835	4.7947	3.5098	0.99966	0.00033629	0.00067257	0.080868	TRUE
hsLibDrugV1Nik_22648	GDF11	0/0/10.386	8.6295/21.5/8.0917	0.94418	8.6295	2.3083	53.935	4.7947	3.5098	0.99966	0.00033629	0.00067257	0.080868	TRUE
hsLibDrugV1Nik_01918	KLK5	0/0/18.884	8.6295/22.575/0	0.94418	8.6295	2.3083	178.3	4.7947	3.5098	0.99966	0.00033629	0.00067257	0.080868	TRUE
hsLibDrugV1Nik_19707	WFDC2	0/0/0	8.6295/9.6749/1.0115	0.94418	8.6295	2.3083	0	4.7947	3.5098	0.99966	0.00033629	0.00067257	0.080868	TRUE
hsLibDrugV1Nik_12071	MMP11	241.27/219.22/208.66	283.81/385.92/345.92	219.22	345.92	0.65567	298.84	1388.6	3.4001	0.99966	0.0003368	0.0006736	0.080868	TRUE
hsLibDrugV1Nik_15551	CAMKK1	882.24/927.24/1135.9	1178.4/1195.4/1209.7	927.24	1195.4	0.36612	22772	6237.9	3.3951	0.99966	0.00034298	0.00068595	0.081635	TRUE
hsLibDrugV1Nik_12291	ACTN2	0/0/25.493	4.7941/8.5999/12.138	0.94418	8.5999	2.3039	324.95	4.7947	3.4963	0.99965	0.00035375	0.00070751	0.082043	TRUE
hsLibDrugV1Nik_20522	ADAMTS2	0/0/4.7209	14.382/8.5999/5.0573	0.94418	8.5999	2.3039	11.144	4.7947	3.4963	0.99965	0.00035375	0.00070751	0.082043	TRUE
hsLibDrugV1Nik_18214	CREG2	14.497/0/0	32.6/8.5999/0	0.94418	8.5999	2.3039	105.08	4.7947	3.4963	0.99965	0.00035375	0.00070751	0.082043	TRUE
hsLibDrugV1Nik_26551	NonTargetingGuide245	0/0/26.437	3.8353/8.5999/21.241	0.94418	8.5999	2.3039	349.46	4.7947	3.4963	0.99965	0.00035375	0.00070751	0.082043	TRUE
hsLibDrugV1Nik_14597	PRKCE	0/0/0.94418	9.5883/8.5999/0	0.94418	8.5999	2.3039	0.44574	4.7947	3.4963	0.99965	0.00035375	0.00070751	0.082043	TRUE
hsLibDrugV1Nik_06682	GSN	148.08/130.35/140.68	269.43/240.8/110.25	140.68	240.8	0.77113	80.75	874.91	3.3847	0.99964	0.00035634	0.00071268	0.082043	TRUE
hsLibDrugV1Nik_13518	KCNK1	736.24/827.5/686.42	973.21/494.49/986.18	736.24	973.21	0.4021	5405.6	4905.3	3.3835	0.99964	0.00035786	0.00071573	0.082043	TRUE
hsLibDrugV1Nik_23729	KLHL2	181.21/158.98/123.69	241.62/265.52/283.21	158.98	265.52	0.73633	869.94	993.73	3.3797	0.99964	0.00036288	0.00072575	0.082488	TRUE
hsLibDrugV1Nik_10758	DMPK	225.74/336.73/248.32	333.67/382.7/407.62	248.32	382.7	0.62196	4163	1581.1	3.3794	0.99964	0.00036322	0.00072645	0.082488	TRUE
hsLibDrugV1Nik_15176	TYMS	164.64/222.18/147.29	286.69/273.05/202.29	164.64	273.05	0.72634	1805.8	1030.6	3.3767	0.99963	0.00036678	0.00073355	0.082949	TRUE
hsLibDrugV1Nik_09701	GLRA4	353.1/337.72/351.24	537.9/266.6/511.8	351.24	511.8	0.54186	93.14	2268.9	3.3709	0.99963	0.00037464	0.00074927	0.084377	TRUE
hsLibDrugV1Nik_17506	ACKR2	538.46/384.13/457.93	656.8/641.77/428.86	457.93	641.77	0.48603	5965.8	2991	3.3615	0.99961	0.00038765	0.0007753	0.086949	TRUE
hsLibDrugV1Nik_07001	PSMB2	415.23/570.76/478.7	666.39/671.87/666.56	478.7	666.56	0.47675	6251.5	3132.5	3.3564	0.99961	0.00039478	0.00078956	0.088185	TRUE
hsLibDrugV1Nik_19747	PIP4K2B	282.69/180.71/176.56	187.93/293.47/305.46	180.71	293.47	0.69651	5208.9	1135.5	3.3463	0.99959	0.00040942	0.00081884	0.090711	TRUE
hsLibDrugV1Nik_17023	DEFB114	4.142/30.612/8.4977	31.641/38.7/0	8.4977	31.641	1.7811	254	47.116	3.3717	0.99958	0.00041873	0.00083745	0.092025	TRUE
hsLibDrugV1Nik_20256	CST2	12.426/58.261/34.935	28.765/82.774/82.94	34.935	82.774	1.2211	525.38	205.16	3.3399	0.99958	0.00042208	0.00084416	0.09239	TRUE
hsLibDrugV1Nik_26489	NonTargetingGuide183	152.22/143.18/133.13	158.21/284.87/242.75	143.18	242.75	0.7575	91.35	891.11	3.3354	0.99957	0.00042581	0.00085162	0.092833	TRUE
hsLibDrugV1Nik_21509	MAP4K3	360.35/534.22/363.51	524.48/555.77/443.02	363.51	524.48	0.52767	14577	2351.5	3.3194	0.99955	0.00045103	0.00090205	0.097939	TRUE
hsLibDrugV1Nik_26533	NonTargetingGuide227	219.53/204.41/189.78	323.12/264.45/326.7	204.41	323.12	0.65806	221.24	1291	3.304	0.99952	0.0004765	0.000953	0.10265	TRUE
hsLibDrugV1Nik_12692	MYT1	168.79/162.93/190.73	276.14/332.17/255.9	168.79	276.14	0.70691	257.79	1057.6	3.3011	0.99952	0.00048148	0.00096297	0.10332	TRUE
hsLibDrugV1Nik_20353	UBA6	1.0355/0.98748/0.94418	8.6295/11.825/0	0.98748	8.6295	2.2765	0.0020901	5.0234	3.4096	0.99951	0.00048531	0.00097062	0.10373	TRUE
hsLibDrugV1Nik_13159	KARS	14.497/10.862/101.97	51.777/5.3749/44.504	14.497	44.504	1.554	3832.5	82.138	3.311	0.99951	0.00049181	0.00098362	0.10471	TRUE
hsLibDrugV1Nik_12552	FOLH1	144.97/108.62/106.69	193.68/206.4/89.009	108.62	193.68	0.82859	662.43	668.34	3.2903	0.9995	0.00050046	0.0010009	0.10614	TRUE
hsLibDrugV1Nik_26694	NonTargetingGuide388	523.96/450.29/405.06	628.03/651.44/540.12	450.29	628.03	0.47908	3736.9	2939	3.2786	0.99948	0.00052159	0.0010432	0.11019	TRUE
hsLibDrugV1Nik_02269	RIOK2	472.19/563.85/453.21	653.92/694.44/525.96	472.19	653.92	0.46891	4381	3088.1	3.2703	0.99946	0.00053713	0.0010743	0.1126	TRUE
hsLibDrugV1Nik_10482	VAMP1	337.57/315/398.45	489.96/479.45/515.85	337.57	489.96	0.53614	2107.4	2177	3.266	0.99945	0.00054533	0.0010907	0.11363	TRUE
hsLibDrugV1Nik_21745	PPIH	529.14/331.79/389.95	554.2/402.05/640.26	389.95	554.2	0.50604	11378	2530	3.2656	0.99945	0.00054621	0.0010924	0.11363	TRUE
hsLibDrugV1Nik_25527	REV3L	181.21/251.81/173.73	173.55/348.3/291.3	181.21	291.3	0.68184	2519.8	1138.8	3.2623	0.99945	0.00055264	0.0011053	0.11453	TRUE
hsLibDrugV1Nik_06855	CNTF	315.83/272.54/268.15	316.41/417.1/408.63	272.54	408.63	0.58256	946.4	1742.1	3.2605	0.99944	0.00055599	0.001112	0.11479	TRUE
hsLibDrugV1Nik_15158	CFTR	596.45/887.74/613.72	890.75/821.29/715.11	613.72	821.29	0.41972	37693	4057.9	3.2585	0.99944	0.00056004	0.0011201	0.11516	TRUE
hsLibDrugV1Nik_09345	TRAV8-4	190.53/294.27/203	361.48/165.55/319.62	203	319.62	0.65231	4242.7	1281.8	3.2575	0.99944	0.00056205	0.0011241	0.11516	TRUE
hsLibDrugV1Nik_02781	USP7	263.02/246.87/422.99	396/302.07/438.98	263.02	396	0.5885	12927	1678.7	3.2456	0.99941	0.00058595	0.0011719	0.11961	TRUE
hsLibDrugV1Nik_20320	FGF7	1036.5/897.62/986.67	1314.6/994.36/1250.2	986.67	1250.2	0.34117	5208.7	6655	3.23	0.99938	0.00061892	0.0012378	0.12467	TRUE
hsLibDrugV1Nik_21636	SV2C	401.77/226.13/261.54	298.2/475.15/393.46	261.54	393.46	0.58735	10460	1668.9	3.2293	0.99938	0.00062055	0.0012411	0.12467	TRUE
hsLibDrugV1Nik_23688	GRK5	512.57/708.02/468.32	632.83/699.82/734.32	512.57	699.82	0.44847	20079	3363.7	3.2285	0.99938	0.00062215	0.0012443	0.12467	TRUE
hsLibDrugV1Nik_12988	AZGP1	260.95/280.44/220.94	395.04/233.27/392.45	260.95	392.45	0.58691	990.33	1664.9	3.2228	0.99937	0.00063462	0.0012692	0.1267	TRUE
hsLibDrugV1Nik_07551	AMY2A	173.96/176.76/279.48	283.81/239.72/343.9	176.76	283.81	0.6801	5279.7	1109.7	3.2137	0.99934	0.00065518	0.0013104	0.13033	TRUE
hsLibDrugV1Nik_13139	NTM	358.28/545.09/367.29	523.52/438.6/552.26	367.29	523.52	0.51016	15847	2377	3.2045	0.99932	0.00067657	0.0013531	0.13313	TRUE
hsLibDrugV1Nik_22936	MSLN	2.071/10.862/0	14.382/12.9/0	2.071	12.9	2.1783	40.787	10.85	3.2875	0.99931	0.00068744	0.0013749	0.13422	TRUE
hsLibDrugV1Nik_00169	CCL24	277.51/295.26/253.99	412.3/572.97/339.85	277.51	412.3	0.56943	434.16	1775.2	3.199	0.99931	0.00068954	0.0013791	0.13422	TRUE
hsLibDrugV1Nik_22531	DPP4	719.67/604.34/567.45	829.39/698.74/806.14	604.34	806.14	0.41508	7331.3	3993.3	3.1935	0.9993	0.00070288	0.0014058	0.13564	TRUE
hsLibDrugV1Nik_03092	SLCO5A1	462.87/373.27/394.67	544.61/620.27/556.31	394.67	556.31	0.49418	2554.6	2561.9	3.1935	0.9993	0.00070289	0.0014058	0.13564	TRUE
hsLibDrugV1Nik_03886	NRG1	20.71/1.975/16.995	10.547/69.874/48.55	16.995	48.55	1.4613	119.71	96.917	3.2053	0.9993	0.00070431	0.0014086	0.13564	TRUE
hsLibDrugV1Nik_26315	NonTargetingGuide009	9.3195/13.825/23.605	42.188/0/56.642	13.825	42.188	1.5426	57.972	78.178	3.2079	0.99929	0.00071042	0.0014208	0.13634	TRUE
hsLibDrugV1Nik_00193	KIR2DL3	759.02/966.74/747.79	985.67/995.44/909.31	759.02	985.67	0.37654	21637	5063.5	3.1852	0.99928	0.00072322	0.0014464	0.13831	TRUE
hsLibDrugV1Nik_17690	CASP7	1.0355/0/9.4418	0/8.5999/26.298	1.0355	8.5999	2.2376	35.869	5.2777	3.2927	0.99926	0.00073617	0.0014723	0.13981	TRUE
hsLibDrugV1Nik_17872	CHAT	442.16/557.92/394.67	612.69/482.67/671.61	442.16	612.69	0.46969	7828.5	2883.8	3.1756	0.99925	0.00074758	0.0014952	0.14096	TRUE
hsLibDrugV1Nik_11500	SMPDL3B	10.355/1.975/0.94418	12.465/32.25/6.0688	1.975	12.465	2.1783	35.644	10.327	3.2642	0.99925	0.00075139	0.0015028	0.14096	TRUE
hsLibDrugV1Nik_08618	ALDH16A1	510.5/528.3/588.23	715.29/679.39/803.1	528.3	715.29	0.43645	1954.1	3471.3	3.1737	0.99925	0.0007526	0.0015052	0.14096	TRUE
hsLibDrugV1Nik_06486	BIRC5	5.1775/5.9249/2.8326	12.465/30.1/22.252	5.1775	22.252	1.9123	3.0286	28.14	3.2188	0.99923	0.00077035	0.0015407	0.143	TRUE
hsLibDrugV1Nik_27179	NonTargetingGuide873	280.62/210.33/213.39	352.85/259.07/329.74	213.39	329.74	0.62548	2264.9	1350.1	3.1665	0.99923	0.00077133	0.0015427	0.143	TRUE
hsLibDrugV1Nik_12054	NRXN1	369.67/462.14/330.46	524.48/480.52/582.6	369.67	524.48	0.50349	5043.6	2393.1	3.1645	0.99922	0.00077668	0.0015534	0.14337	TRUE
hsLibDrugV1Nik_06769	CDC42	596.45/727.77/510.8	503.38/887.94/795.01	596.45	795.01	0.41398	12290	3939	3.1638	0.99922	0.00077861	0.0015572	0.14337	TRUE
hsLibDrugV1Nik_27177	NonTargetingGuide871	573.67/661.61/486.26	807.33/767.54/456.17	573.67	767.54	0.4194	7687.3	3782.4	3.1524	0.99919	0.00080968	0.0016194	0.14661	TRUE
hsLibDrugV1Nik_02805	CXCL9	5.1775/29.624/8.4977	30.682/3.225/30.344	8.4977	30.344	1.7225	228.68	47.116	3.1827	0.99918	0.00081782	0.0016356	0.14661	TRUE
hsLibDrugV1Nik_04480	NR6A1	896.74/760.36/795.95	1185.1/1025.5/844.57	795.95	1025.5	0.36523	5713.1	5320.4	3.1476	0.99918	0.00082301	0.001646	0.14661	TRUE
hsLibDrugV1Nik_15985	CST7	9.3195/0/0	7.6706/34.4/8.0917	0.94418	8.0917	2.2254	43.426	4.7947	3.2642	0.99918	0.0008231	0.0016462	0.14661	TRUE
hsLibDrugV1Nik_04907	ENPP6	0/0/0	0/9.6749/8.0917	0.94418	8.0917	2.2254	0	4.7947	3.2642	0.99918	0.0008231	0.0016462	0.14661	TRUE
hsLibDrugV1Nik_22811	IL24	0/2.9624/0	16.3/6.4499/8.0917	0.94418	8.0917	2.2254	4.388	4.7947	3.2642	0.99918	0.0008231	0.0016462	0.14661	TRUE
hsLibDrugV1Nik_02587	LGMN	0/3.9499/0	25.888/3.225/8.0917	0.94418	8.0917	2.2254	7.8009	4.7947	3.2642	0.99918	0.0008231	0.0016462	0.14661	TRUE
hsLibDrugV1Nik_19725	SPINT3	0/0/0	11.506/1.075/8.0917	0.94418	8.0917	2.2254	0	4.7947	3.2642	0.99918	0.0008231	0.0016462	0.14661	TRUE
hsLibDrugV1Nik_15117	BPIFB4	16.568/0.98748/3.7767	18.218/22.575/6.0688	3.7767	18.218	2.0083	85.698	20.268	3.2077	0.99916	0.00083712	0.0016742	0.14814	TRUE
hsLibDrugV1Nik_21382	KLHL24	213.31/148.12/270.98	335.59/248.32/328.73	213.31	328.73	0.62155	3787.8	1349.7	3.1416	0.99916	0.00084026	0.0016805	0.14821	TRUE
hsLibDrugV1Nik_21178	TAC4	244.38/175.77/215.27	278.06/331.1/344.91	215.27	331.1	0.61874	1203.8	1362.6	3.1377	0.99915	0.00085142	0.0017028	0.1497	TRUE
hsLibDrugV1Nik_09855	C8B	316.86/402.89/357.85	447.77/508.47/523.94	357.85	508.47	0.50563	1854.3	2313.4	3.1316	0.99913	0.00086921	0.0017384	0.15184	TRUE
hsLibDrugV1Nik_15682	UCHL3	1287.1/1420/1475.8	1463.2/1728.6/1916.7	1420	1728.6	0.28353	10382	9725.4	3.1292	0.99912	0.00087647	0.0017529	0.15262	TRUE
hsLibDrugV1Nik_26514	NonTargetingGuide208	503.25/628.03/501.36	682.69/763.24/659.48	503.25	682.69	0.43919	7787.1	3300	3.1235	0.99911	0.0008935	0.001787	0.15499	TRUE
hsLibDrugV1Nik_04530	GZMA	4.142/0/5.6651	19.177/9.6749/20.229	4.142	19.177	1.9723	9.738	22.311	3.183	0.9991	0.00090009	0.0018002	0.15525	TRUE
hsLibDrugV1Nik_12470	HP	365.53/392.03/449.43	419.97/598.77/549.23	392.03	549.23	0.48539	1998.7	2544	3.1166	0.99909	0.00091462	0.0018292	0.15676	TRUE
hsLibDrugV1Nik_20742	GPR84	522.93/464.11/403.17	635.7/660.04/489.55	464.11	635.7	0.45304	3586.7	3033.1	3.1156	0.99908	0.00091774	0.0018355	0.1568	TRUE
hsLibDrugV1Nik_15876	OR2T29	429.73/416.71/541.96	594.47/691.22/462.24	429.73	594.47	0.46725	6382.5	2799.4	3.1137	0.99908	0.00092392	0.0018478	0.15737	TRUE
hsLibDrugV1Nik_02169	ANXA1	686.54/624.08/730.8	949.24/896.54/891.1	686.54	896.54	0.38454	2929.7	4560.7	3.1097	0.99906	0.00093651	0.001873	0.15887	TRUE
hsLibDrugV1Nik_24448	KSR2	293.05/279.46/302.14	427.64/461.17/421.78	293.05	427.64	0.54372	133.69	1878.8	3.1051	0.99905	0.000951	0.001902	0.16047	TRUE
hsLibDrugV1Nik_00058	GPC4	630.62/750.48/711.92	954.99/700.89/925.49	711.92	925.49	0.37805	4048.3	4736.5	3.1033	0.99904	0.00095691	0.0019138	0.16097	TRUE
hsLibDrugV1Nik_24968	TTR	453.55/474.98/373.9	622.28/388.07/646.33	453.55	622.28	0.45545	3401.7	2961.2	3.1007	0.99903	0.00096529	0.0019306	0.16188	TRUE
hsLibDrugV1Nik_09530	TNFRSF25	303.4/389.07/225.66	440.1/367.65/479.43	303.4	440.1	0.53514	6691	1948	3.0973	0.99902	0.00097655	0.0019531	0.16327	TRUE
hsLibDrugV1Nik_19132	KIR2DL4	294.08/287.36/235.1	419.97/421.4/354.01	287.36	419.97	0.54586	1387.8	1840.8	3.0908	0.999	0.00099793	0.0019959	0.16633	TRUE
hsLibDrugV1Nik_08998	FCN2	393.49/360.43/372.01	400.79/523.52/551.25	372.01	523.52	0.49179	297.76	2408.8	3.087	0.99899	0.0010109	0.0020217	0.16696	TRUE
hsLibDrugV1Nik_17217	CTSW	157.4/138.25/177.51	254.09/173.07/278.15	157.4	254.09	0.68747	385.57	983.4	3.0834	0.99898	0.0010232	0.0020463	0.16848	TRUE
hsLibDrugV1Nik_15623	LAMA5	201.92/350.55/207.72	349.01/319.27/248.82	207.72	319.27	0.61772	10217	1312.8	3.0787	0.99896	0.0010395	0.002079	0.17065	TRUE
hsLibDrugV1Nik_14237	NRXN3	281.66/261.68/258.71	432.43/293.47/387.39	261.68	387.39	0.5642	203.91	1669.8	3.0764	0.99895	0.0010477	0.0020954	0.17149	TRUE
hsLibDrugV1Nik_26531	NonTargetingGuide225	353.1/194.53/235.1	353.81/366.57/204.32	235.1	353.81	0.58763	7785.3	1493.5	3.0716	0.99894	0.0010647	0.0021293	0.1732	TRUE
hsLibDrugV1Nik_14055	NTSR1	830.47/820.59/1096.2	1059.5/1087.9/945.72	830.47	1059.5	0.35102	35355	5561.1	3.0713	0.99893	0.0010656	0.0021313	0.1732	TRUE
hsLibDrugV1Nik_07253	DCLK2	616.12/655.68/708.14	858.15/648.22/912.34	655.68	858.15	0.38771	2158.3	4347.4	3.0707	0.99893	0.0010677	0.0021355	0.1732	TRUE
hsLibDrugV1Nik_06126	GPR33	228.85/223.17/216.22	348.05/338.62/227.58	223.17	338.62	0.59934	40.266	1414.7	3.0695	0.99893	0.001072	0.0021439	0.17337	TRUE
hsLibDrugV1Nik_16204	CST6	601.62/664.57/624.11	828.43/674.02/820.3	624.11	820.3	0.39381	1071.4	4129.5	3.0531	0.99887	0.0011326	0.0022652	0.18188	TRUE
hsLibDrugV1Nik_14811	LPAR1	23.816/0.98748/0	0/8.5999/8.0917	0.98748	8.0917	2.1936	261.07	5.0234	3.1697	0.99886	0.0011384	0.0022768	0.18188	TRUE
hsLibDrugV1Nik_24778	KCND2	217.45/251.81/277.59	373.94/296.7/388.4	251.81	373.94	0.56864	922.42	1604.2	3.0494	0.99885	0.0011466	0.0022931	0.18219	TRUE
hsLibDrugV1Nik_13880	VCL	582.99/730.73/577.84	731.59/771.84/838.51	582.99	771.84	0.40424	10928	3846.4	3.0451	0.99884	0.001163	0.0023259	0.18373	TRUE
hsLibDrugV1Nik_26699	NonTargetingGuide393	247.48/165.9/160.51	179.3/283.8/263.99	165.9	263.99	0.667	3342.8	1038.8	3.0437	0.99883	0.0011686	0.0023372	0.18388	TRUE
hsLibDrugV1Nik_08914	TSHB	410.06/296.24/292.7	454.48/340.77/428.86	296.24	428.86	0.53223	6483.2	1900.1	3.0424	0.99883	0.0011736	0.0023472	0.18388	TRUE
hsLibDrugV1Nik_24513	ABHD16A	819.08/877.87/829.94	902.26/1056.7/1131.8	829.94	1056.7	0.34814	1207.5	5557.4	3.042	0.99883	0.001175	0.00235	0.18388	TRUE
hsLibDrugV1Nik_19185	ADH1C	577.81/523.36/684.53	781.44/765.39/641.27	577.81	765.39	0.405	7177.4	3810.9	3.0387	0.99881	0.0011881	0.0023762	0.18388	TRUE
hsLibDrugV1Nik_08904	HIST1H1C	395.56/625.07/345.57	549.41/431.07/554.28	395.56	549.41	0.47296	27587	2567.9	3.036	0.9988	0.0011987	0.0023974	0.18388	TRUE
hsLibDrugV1Nik_14125	PRAME	511.54/625.07/534.41	714.33/606.29/755.57	534.41	714.33	0.41796	4371.5	3513.1	3.0355	0.9988	0.0012007	0.0024015	0.18388	TRUE
hsLibDrugV1Nik_23958	GAPDH	619.23/588.54/592.95	751.72/838.49/782.87	592.95	782.87	0.40029	355.05	3914.9	3.0355	0.9988	0.0012009	0.0024017	0.18388	TRUE
hsLibDrugV1Nik_14872	FOS	363.46/422.64/354.07	544.61/510.62/403.57	363.46	510.62	0.48931	1795.2	2351.2	3.0349	0.9988	0.0012031	0.0024062	0.18388	TRUE
hsLibDrugV1Nik_00042	SLC5A9	430.77/362.4/372.01	369.15/531.04/520.9	372.01	520.9	0.48458	1772.4	2408.8	3.0337	0.99879	0.0012077	0.0024153	0.18388	TRUE
hsLibDrugV1Nik_27156	NonTargetingGuide850	306.51/269.58/250.21	391.2/412.8/395.48	269.58	395.48	0.5512	869.42	1722.3	3.0337	0.99879	0.0012079	0.0024157	0.18388	TRUE
hsLibDrugV1Nik_02715	TTN	226.77/183.67/210.55	321.21/339.7/217.47	210.55	321.21	0.60697	492.9	1331.5	3.0325	0.99879	0.0012127	0.0024254	0.18388	TRUE
hsLibDrugV1Nik_08745	OSM	173.96/190.58/253.99	300.11/295.62/292.31	190.58	295.62	0.63066	2148.1	1200.2	3.0319	0.99879	0.001215	0.0024299	0.18388	TRUE
hsLibDrugV1Nik_12452	CYBB	422.48/531.26/454.15	454.48/619.19/719.15	454.15	619.19	0.44637	3474.4	2965.3	3.0308	0.99878	0.0012196	0.0024391	0.18388	TRUE
hsLibDrugV1Nik_03219	SLC22A18	439.05/425.6/478.7	601.19/631.02/443.02	439.05	601.19	0.45254	876.51	2862.7	3.0303	0.99878	0.0012215	0.002443	0.18388	TRUE
hsLibDrugV1Nik_09811	SMG1	453.55/502.63/447.54	618.44/636.39/608.9	453.55	618.44	0.44654	1222.3	2961.2	3.0302	0.99878	0.0012218	0.0024437	0.18388	TRUE
hsLibDrugV1Nik_18845	KCNC3	5.1775/3.9499/3.7767	0/20.425/18.206	3.9499	18.206	1.9561	0.76848	21.236	3.0937	0.99877	0.0012288	0.0024575	0.18388	TRUE
hsLibDrugV1Nik_17353	ITGAE	312.72/263.66/292.7	512.01/388.07/423.8	292.7	423.8	0.53247	622.16	1876.4	3.0266	0.99876	0.0012365	0.0024731	0.18402	TRUE
hsLibDrugV1Nik_08373	NLGN3	446.3/412.76/405.06	569.54/700.89/408.63	412.76	569.54	0.46353	592.01	2684.4	3.026	0.99876	0.0012391	0.0024782	0.18402	TRUE
hsLibDrugV1Nik_22348	FARS2	502.22/619.15/502.31	743.09/571.89/675.66	502.31	675.66	0.42699	6825.9	3293.6	3.0206	0.99874	0.0012612	0.0025224	0.18607	TRUE
hsLibDrugV1Nik_27184	NonTargetingGuide878	377.96/567.8/377.67	527.36/380.55/559.34	377.96	527.36	0.47947	18020	2449	3.0189	0.99873	0.0012683	0.0025366	0.18607	TRUE
hsLibDrugV1Nik_20500	PLK4	159.47/138.25/173.73	136.15/254.77/293.33	159.47	254.77	0.67259	326.87	996.88	3.0185	0.99873	0.0012699	0.0025399	0.18607	TRUE
hsLibDrugV1Nik_21675	MAPK9	153.25/317.97/153.9	247.38/155.87/247.81	153.9	247.38	0.68118	13459	960.68	3.0158	0.99872	0.0012813	0.0025626	0.18723	TRUE
hsLibDrugV1Nik_05832	P2RY2	479.44/651.73/469.26	648.17/674.02/587.66	479.44	648.17	0.43425	14895	3137.5	3.0124	0.9987	0.0012961	0.0025923	0.18889	TRUE
hsLibDrugV1Nik_02918	RARG	544.67/468.06/540.07	629.95/719.17/1008.4	540.07	719.17	0.41251	2603.3	3551.9	3.005	0.99867	0.0013278	0.0026556	0.19247	TRUE
hsLibDrugV1Nik_11499	SMPDL3B	299.26/269.58/383.34	400.79/511.69/430.88	299.26	430.88	0.52444	3975.1	1920.3	3.0037	0.99867	0.0013336	0.0026672	0.1928	TRUE
hsLibDrugV1Nik_15587	F2R	248.52/338.7/268.15	263.68/392.37/392.45	268.15	392.37	0.54749	2681.7	1712.8	3.0015	0.99866	0.0013431	0.0026861	0.19366	TRUE
hsLibDrugV1Nik_20632	NPTX2	257.84/232.06/238.88	355.73/427.85/289.28	238.88	355.73	0.57251	203.02	1518.5	2.9985	0.99864	0.0013566	0.0027133	0.1951	TRUE
hsLibDrugV1Nik_15192	C6	296.15/266.62/359.73	302.03/426.77/453.14	296.15	426.77	0.52563	2457.5	1899.5	2.997	0.99864	0.0013634	0.0027269	0.19527	TRUE
hsLibDrugV1Nik_16681	OR1L8	682.39/450.29/372.01	645.29/612.74/499.66	450.29	612.74	0.44359	30000	2939	2.9966	0.99863	0.001365	0.00273	0.19527	TRUE
hsLibDrugV1Nik_19157	NPPB	465.97/446.34/628.83	646.25/595.54/631.15	465.97	631.15	0.43693	13453	3045.8	2.993	0.99862	0.0013811	0.0027623	0.19706	TRUE
hsLibDrugV1Nik_02800	CXCL9	571.6/405.85/412.61	465.99/637.47/567.43	412.61	567.43	0.45872	12661	2683.3	2.9888	0.9986	0.0014002	0.0028004	0.19837	TRUE
hsLibDrugV1Nik_05997	METAP2	358.28/520.4/398.45	550.37/605.22/441	398.45	550.37	0.46501	8242.9	2587.4	2.9867	0.99859	0.0014102	0.0028205	0.19837	TRUE
hsLibDrugV1Nik_11806	FCGR3A	248.52/485.84/278.53	483.25/398.82/404.59	278.53	404.59	0.53698	21938	1782	2.9861	0.99859	0.001413	0.002826	0.19837	TRUE
hsLibDrugV1Nik_23770	MCAM	781.8/704.07/667.54	1046.1/908.37/851.65	704.07	908.37	0.36709	3688.3	4682.2	2.9856	0.99859	0.001415	0.00283	0.19837	TRUE
hsLibDrugV1Nik_19430	ADA2	271.3/250.82/305.92	354.77/395.6/426.84	271.3	395.6	0.54247	808.86	1733.8	2.9851	0.99858	0.0014175	0.002835	0.19837	TRUE
hsLibDrugV1Nik_12182	HCN1	911.24/836.39/971.57	1144.8/1181.4/1038.8	911.24	1144.8	0.32892	4620.7	6125.7	2.9847	0.99858	0.0014194	0.0028388	0.19837	TRUE
hsLibDrugV1Nik_01102	BOC	244.38/380.18/286.09	423.8/271.97/413.69	286.09	413.69	0.53054	5296.4	1832.3	2.9809	0.99856	0.0014368	0.0028736	0.19978	TRUE
hsLibDrugV1Nik_16800	IL37	237.13/247.86/338.02	366.27/385.92/272.08	247.86	366.27	0.56154	4122.1	1578	2.9809	0.99856	0.0014369	0.0028737	0.19978	TRUE
hsLibDrugV1Nik_05963	INS-IGF2	360.35/283.41/325.74	462.16/485.9/366.15	325.74	462.16	0.50334	1495.2	2097.6	2.9784	0.99855	0.0014487	0.0028973	0.20091	TRUE
hsLibDrugV1Nik_13502	GPR45	409.02/473/409.78	567.63/394.52/563.39	409.78	563.39	0.45833	1999	2664.1	2.9761	0.99854	0.0014598	0.0029196	0.20194	TRUE
hsLibDrugV1Nik_24948	KBTBD2	280.62/303.16/342.74	441.06/434.3/267.03	303.16	434.3	0.51719	1037.4	1946.3	2.9725	0.99852	0.0014767	0.0029534	0.20295	TRUE
hsLibDrugV1Nik_23433	ATIC	353.1/353.52/415.44	503.38/495.57/441	353.52	495.57	0.48615	1917.4	2284.2	2.9722	0.99852	0.0014782	0.0029565	0.20295	TRUE
hsLibDrugV1Nik_20264	NPPA	232.99/222.18/197.33	333.67/335.4/226.57	222.18	333.67	0.58453	367.07	1408.2	2.9711	0.99852	0.0014839	0.0029678	0.20303	TRUE
hsLibDrugV1Nik_06677	IL1RN	228.85/295.26/259.65	559/380.55/355.02	259.65	380.55	0.54974	1108.3	1656.3	2.9706	0.99851	0.0014863	0.0029726	0.20303	TRUE
hsLibDrugV1Nik_10786	TPH1	86.982/85.91/157.68	155.33/107.5/198.25	86.982	155.33	0.82932	2499.6	530.3	2.968	0.9985	0.0014988	0.0029976	0.20359	TRUE
hsLibDrugV1Nik_26347	NonTargetingGuide041	537.42/508.55/517.41	690.36/543.94/719.15	517.41	690.36	0.41533	239.49	3396.8	2.9673	0.9985	0.001502	0.0030039	0.20359	TRUE
hsLibDrugV1Nik_11002	TDO2	8.284/0/1.8884	11.506/4.3/16.183	1.8884	11.506	2.1143	22.235	9.8571	3.0633	0.99849	0.0015071	0.0030142	0.20359	TRUE
hsLibDrugV1Nik_09537	SIRT2	352.07/227.12/214.33	380.65/339.7/206.34	227.12	339.7	0.5787	7888	1440.8	2.9659	0.99849	0.0015091	0.0030182	0.20359	TRUE
hsLibDrugV1Nik_04180	LAMP1	2.071/4.9374/0.94418	0/12.9/12.138	2.071	12.138	2.0969	4.7429	10.85	3.0561	0.99847	0.0015251	0.0030501	0.20474	TRUE
hsLibDrugV1Nik_27292	NonTargetingGuide986	268.19/291.31/298.36	464.07/419.25/240.73	291.31	419.25	0.52376	291.97	1867.2	2.9609	0.99847	0.0015339	0.0030678	0.20542	TRUE
hsLibDrugV1Nik_07815	CNTN4	474.26/409.8/417.33	571.46/435.37/578.56	417.33	571.46	0.45254	1648.8	2715.3	2.9579	0.99845	0.0015487	0.0030974	0.20689	TRUE
hsLibDrugV1Nik_25678	RAMP3	1.0355/27.649/0	35.477/0/8.0917	1.0355	8.0917	2.1592	354.68	5.2777	3.0715	0.99842	0.0015802	0.0031603	0.20847	TRUE
hsLibDrugV1Nik_02271	RIOK2	404.88/490.78/419.22	573.38/593.39/445.04	419.22	573.38	0.45087	2663	2728.1	2.9515	0.99842	0.0015811	0.0031621	0.20847	TRUE
hsLibDrugV1Nik_12828	DHRSX	251.63/223.17/258.71	302.03/369.8/410.66	251.63	369.8	0.55362	429.95	1603	2.9515	0.99842	0.0015814	0.0031628	0.20847	TRUE
hsLibDrugV1Nik_15299	GUCY2D	0/0/5.6651	7.6706/0/8.0917	0.94418	7.6706	2.157	16.047	4.7947	3.0719	0.99841	0.0015949	0.0031899	0.20847	TRUE
hsLibDrugV1Nik_07967	KCNK6	7.2485/0/0	7.6706/0/17.195	0.94418	7.6706	2.157	26.27	4.7947	3.0719	0.99841	0.0015949	0.0031899	0.20847	TRUE
hsLibDrugV1Nik_05722	KLK10	0/0/0.94418	7.6706/4.3/9.1032	0.94418	7.6706	2.157	0.44574	4.7947	3.0719	0.99841	0.0015949	0.0031899	0.20847	TRUE
hsLibDrugV1Nik_02232	LILRB5	0/0/0	7.6706/2.15/16.183	0.94418	7.6706	2.157	0	4.7947	3.0719	0.99841	0.0015949	0.0031899	0.20847	TRUE
hsLibDrugV1Nik_16406	PRSS33	0/0/0	7.6706/8.5999/0	0.94418	7.6706	2.157	0	4.7947	3.0719	0.99841	0.0015949	0.0031899	0.20847	TRUE
hsLibDrugV1Nik_22850	S100A12	220.56/165.9/236.05	376.82/177.37/330.75	220.56	330.75	0.58239	1614	1397.5	2.9476	0.9984	0.0016014	0.0032028	0.20881	TRUE
hsLibDrugV1Nik_06902	JAG1	388.31/329.82/414.5	668.3/449.35/536.08	388.31	536.08	0.4642	2053.7	2518.9	2.9442	0.99838	0.001619	0.003238	0.2103	TRUE
hsLibDrugV1Nik_01461	ABCC11	1305.8/1056.6/1098.1	1351.9/1098.6/1379.6	1098.1	1351.9	0.2998	22425	7439.9	2.9432	0.99838	0.0016244	0.0032489	0.2103	TRUE
hsLibDrugV1Nik_22414	SIRPA	491.86/416.71/380.51	569.54/446.12/579.57	416.71	569.54	0.44982	3479.1	2711.1	2.9352	0.99833	0.0016669	0.0033338	0.21529	TRUE
hsLibDrugV1Nik_14112	FFAR1	140.83/184.66/145.4	238.75/151.57/233.65	145.4	233.65	0.68054	780.89	905.5	2.9325	0.99832	0.0016811	0.0033622	0.21661	TRUE
hsLibDrugV1Nik_12841	ALOX15B	945.41/767.27/795.95	933.9/1009.4/1044.8	795.95	1009.4	0.34239	11581	5320.4	2.9266	0.99829	0.0017137	0.0034273	0.2189	TRUE
hsLibDrugV1Nik_11034	STK10	577.81/647.78/719.47	805.42/1132/839.52	647.78	839.52	0.37354	5017.7	4292.9	2.9263	0.99829	0.0017149	0.0034299	0.2189	TRUE
hsLibDrugV1Nik_00660	APLP1	382.1/285.38/270.98	410.38/421.4/223.53	285.38	410.38	0.52253	4780.9	1827.6	2.9239	0.99827	0.0017285	0.003457	0.22011	TRUE
hsLibDrugV1Nik_27275	NonTargetingGuide969	209.17/203.42/282.31	315.45/278.42/325.69	209.17	315.45	0.59044	2691.3	1322.4	2.9227	0.99827	0.0017349	0.0034698	0.22042	TRUE
hsLibDrugV1Nik_13503	GPR45	206.06/127.38/107.64	131.36/225.75/209.37	127.38	209.37	0.71248	3290.2	788.95	2.919	0.99824	0.0017559	0.0035119	0.22157	TRUE
hsLibDrugV1Nik_05159	GRIA1	0/20.737/14.163	1.9177/43/40.459	14.163	40.459	1.4511	121.9	80.169	2.9369	0.99824	0.0017576	0.0035152	0.22157	TRUE
hsLibDrugV1Nik_07155	SULT1B1	259.91/282.42/236.05	378.74/344/428.86	259.91	378.74	0.54145	538.05	1658	2.9182	0.99824	0.0017602	0.0035204	0.22157	TRUE
hsLibDrugV1Nik_04418	AATK	399.7/473.99/493.81	652/636.39/514.84	473.99	636.39	0.42429	2955.6	3100.4	2.9167	0.99823	0.0017687	0.0035374	0.22161	TRUE
hsLibDrugV1Nik_16757	IGLV3-22	444.23/408.81/512.69	601.19/466.55/602.83	444.23	601.19	0.43566	2970.7	2897.8	2.9157	0.99823	0.0017745	0.003549	0.22183	TRUE
hsLibDrugV1Nik_11839	DNMT3B	317.9/181.7/167.12	286.69/158.02/280.18	181.7	280.18	0.62203	9381.8	1142	2.9142	0.99822	0.001783	0.0035661	0.22188	TRUE
hsLibDrugV1Nik_09792	ADGRE5	4.142/0/28.326	4.7941/40.85/18.206	4.142	18.206	1.9012	301	22.311	2.9776	0.99821	0.001794	0.003588	0.22273	TRUE
hsLibDrugV1Nik_03392	P2RX6	173.96/164.91/188.84	282.85/224.67/270.06	173.96	270.06	0.63156	151.61	1091.4	2.9088	0.99819	0.001814	0.0036281	0.22471	TRUE
hsLibDrugV1Nik_19110	KCNT2	219.53/254.77/270.98	221.49/371.95/438.98	254.77	371.95	0.54413	752.46	1623.9	2.9078	0.99818	0.0018199	0.0036398	0.22492	TRUE
hsLibDrugV1Nik_03717	F13B	662.72/494.73/498.53	433.39/664.34/671.61	498.53	664.34	0.41353	13486	3267.8	2.9007	0.99814	0.0018619	0.0037239	0.22908	TRUE
hsLibDrugV1Nik_02005	GRIN2D	220.56/270.57/222.83	331.75/363.35/289.28	222.83	331.75	0.57207	1142.2	1412.4	2.8984	0.99812	0.0018756	0.0037512	0.22972	TRUE
hsLibDrugV1Nik_11223	LILRB2	394.52/484.85/389	391.2/583.72/541.13	394.52	541.13	0.45488	4094.6	2560.9	2.8971	0.99812	0.0018831	0.0037661	0.23012	TRUE
hsLibDrugV1Nik_11677	IGLC7	1006.5/928.23/942.3	1183.2/1172.8/1145	942.3	1172.8	0.31542	2160.3	6343.4	2.8943	0.9981	0.0019002	0.0038003	0.23139	TRUE
hsLibDrugV1Nik_24444	KSR2	355.18/338.7/424.88	493.8/470.85/495.62	355.18	493.8	0.47424	2565.2	2295.4	2.8933	0.99809	0.0019059	0.0038119	0.23139	TRUE
hsLibDrugV1Nik_25744	STEAP1	350/343.64/418.27	439.14/507.39/487.53	350	487.53	0.47697	2351	2260.6	2.8926	0.99809	0.0019106	0.0038211	0.23139	TRUE
hsLibDrugV1Nik_27198	NonTargetingGuide892	422.48/453.25/571.23	639.54/610.59/521.92	453.25	610.59	0.42908	7433	2959.2	2.8924	0.99809	0.0019115	0.003823	0.23139	TRUE
hsLibDrugV1Nik_04521	GPR176	405.92/305.13/323.86	416.13/455.8/494.61	323.86	455.8	0.49175	3542.2	2085	2.8895	0.99807	0.0019291	0.0038581	0.23245	TRUE
hsLibDrugV1Nik_11428	CD86	3.1065/2.9624/16.051	5.753/23.65/15.172	3.1065	15.172	1.9775	83.792	16.541	2.9666	0.99806	0.0019363	0.0038725	0.23245	TRUE
hsLibDrugV1Nik_13693	OR11A1	3.1065/2.9624/11.33	0.95883/17.2/15.172	3.1065	15.172	1.9775	33.825	16.541	2.9666	0.99806	0.0019363	0.0038725	0.23245	TRUE
hsLibDrugV1Nik_07043	LECT2	487.72/532.25/693.98	702.82/642.84/720.16	532.25	702.82	0.4004	14069	3498.3	2.8839	0.99804	0.0019641	0.0039283	0.23395	TRUE
hsLibDrugV1Nik_18798	CGA	312.72/371.29/303.08	442.02/453.65/384.36	312.72	442.02	0.49789	1761.7	2010.3	2.8838	0.99804	0.0019647	0.0039295	0.23395	TRUE
hsLibDrugV1Nik_03144	PTGFR	283.73/223.17/320.08	406.54/391.3/537.09	283.73	406.54	0.51738	2494.3	1816.6	2.8816	0.99802	0.0019785	0.003957	0.23466	TRUE
hsLibDrugV1Nik_15879	CD93	9.3195/0/0.94418	0/7.5249/12.138	0.94418	7.5249	2.1325	35.519	4.7947	3.0053	0.99801	0.0019891	0.0039782	0.23466	TRUE
hsLibDrugV1Nik_09079	DDR1	0/1.975/0	7.6706/7.5249/0	0.94418	7.5249	2.1325	1.9502	4.7947	3.0053	0.99801	0.0019891	0.0039782	0.23466	TRUE
hsLibDrugV1Nik_23338	PSMD14	1.0355/0/0	8.6295/7.5249/1.0115	0.94418	7.5249	2.1325	0.53613	4.7947	3.0053	0.99801	0.0019891	0.0039782	0.23466	TRUE
hsLibDrugV1Nik_14450	AVPR1B	578.84/579.65/593.89	757.47/815.92/687.8	579.65	757.47	0.38544	101.77	3823.5	2.8758	0.99799	0.0020148	0.0040296	0.23718	TRUE
hsLibDrugV1Nik_16337	AR	822.19/777.14/760.07	770.9/1028.8/984.16	777.14	984.16	0.34032	1160.2	5189.5	2.8736	0.99797	0.0020288	0.0040576	0.23832	TRUE
hsLibDrugV1Nik_05893	IL18	640.97/550.02/604.28	718.16/785.82/801.08	604.28	785.82	0.37843	2145	3992.9	2.8729	0.99797	0.0020334	0.0040668	0.23834	TRUE
hsLibDrugV1Nik_05214	GPR25	424.55/507.56/398.45	609.81/412.8/575.52	424.55	575.52	0.43804	3786	2764.3	2.8714	0.99796	0.002043	0.0040861	0.23896	TRUE
hsLibDrugV1Nik_07435	SLC5A3	791.12/676.42/702.47	898.42/915.89/763.66	702.47	898.42	0.3545	4268.5	4671.1	2.867	0.99793	0.0020717	0.0041435	0.24128	TRUE
hsLibDrugV1Nik_06498	MMP3	1030.3/1001.3/958.35	1236.9/1325.5/1121.7	1001.3	1236.9	0.30457	1343.6	6757.9	2.8658	0.99792	0.0020797	0.0041594	0.24136	TRUE
hsLibDrugV1Nik_15804	SLC6A18	294.08/202.43/237.93	256.01/349.37/421.78	237.93	349.37	0.55227	2206.4	1512.3	2.8656	0.99792	0.0020813	0.0041626	0.24136	TRUE
hsLibDrugV1Nik_11091	AGR2	486.68/427.58/548.57	635.7/648.22/672.62	486.68	648.22	0.41276	3661.8	3186.9	2.8614	0.99789	0.0021088	0.0042177	0.24404	TRUE
hsLibDrugV1Nik_17157	IGLV3-27	68.343/105.66/93.474	225.32/144.05/161.83	93.474	161.83	0.78541	390.04	571.58	2.8593	0.99788	0.0021228	0.0042455	0.24471	TRUE
hsLibDrugV1Nik_11380	TRPV4	837.72/816.64/1013.1	1051.8/898.69/1067.1	837.72	1051.8	0.32802	15603	5611.7	2.8583	0.99787	0.0021298	0.0042596	0.2449	TRUE
hsLibDrugV1Nik_01304	IGIP	0/10.862/24.549	31.641/33.325/33.378	10.862	33.325	1.5329	152.66	60.828	2.8801	0.99783	0.0021651	0.0043302	0.24553	TRUE
hsLibDrugV1Nik_04349	ADAM12	292.01/425.6/321.02	450.65/367.65/451.11	321.02	450.65	0.48804	5889.3	2066	2.8519	0.99783	0.0021731	0.0043461	0.24553	TRUE
hsLibDrugV1Nik_07811	AFM	161.54/249.83/180.34	234.91/276.27/280.18	180.34	276.27	0.61261	2591.3	1133.1	2.8499	0.99781	0.0021866	0.0043732	0.24553	TRUE
hsLibDrugV1Nik_22343	ASPN	10.355/0.98748/29.27	24.93/32.25/43.493	10.355	32.25	1.55	222.76	57.875	2.878	0.99781	0.002191	0.004382	0.24553	TRUE
hsLibDrugV1Nik_10277	LEP	438.02/456.21/606.17	611.73/693.37/546.19	456.21	611.73	0.42239	11408	2979.3	2.8492	0.99781	0.0021915	0.004383	0.24553	TRUE
hsLibDrugV1Nik_12351	STK17B	1383.4/1373.6/1350.2	1671.2/1468.4/1649.7	1373.6	1649.7	0.26409	322.14	9394.4	2.8488	0.99781	0.002194	0.004388	0.24553	TRUE
hsLibDrugV1Nik_26082	VRK1	191.57/153.06/219.05	290.52/303.15/152.73	191.57	290.52	0.59826	1119.1	1206.7	2.8487	0.99781	0.0021946	0.0043892	0.24553	TRUE
hsLibDrugV1Nik_16905	SCN10A	337.57/379.19/261.54	475.58/381.62/470.33	337.57	470.33	0.47728	3756.6	2177	2.8453	0.99778	0.0022183	0.0044365	0.24602	TRUE
hsLibDrugV1Nik_20819	CPT1A	483.58/652.72/501.36	664.47/682.62/591.71	501.36	664.47	0.40564	11613	3287.1	2.8449	0.99778	0.0022215	0.004443	0.24602	TRUE
hsLibDrugV1Nik_04783	LTB4R	439.05/448.31/408.83	436.27/591.24/593.73	439.05	591.24	0.42852	499.5	2862.7	2.8445	0.99778	0.002224	0.0044479	0.24602	TRUE
hsLibDrugV1Nik_24311	ERO1A	631.65/631.98/635.44	815.96/638.54/824.34	631.98	815.96	0.3681	6.0119	4183.8	2.8443	0.99777	0.0022253	0.0044506	0.24602	TRUE
hsLibDrugV1Nik_07131	HFE	308.58/272.54/253.99	391.2/483.75/359.07	272.54	391.2	0.51983	821.46	1742.1	2.8429	0.99776	0.002235	0.0044701	0.2466	TRUE
hsLibDrugV1Nik_11391	DMBT1	541.57/482.88/534.41	702.82/727.77/519.89	534.41	702.82	0.39457	1353.4	3513.1	2.8414	0.99775	0.0022461	0.0044921	0.24685	TRUE
hsLibDrugV1Nik_02683	IL21	674.11/676.42/869.59	678.85/879.34/866.83	676.42	866.83	0.35735	18661	4490.8	2.8413	0.99775	0.0022464	0.0044928	0.24685	TRUE
hsLibDrugV1Nik_20036	TLR2	407.99/485.84/372.95	554.2/592.32/421.78	407.99	554.2	0.44096	3644.1	2652	2.8393	0.99774	0.0022607	0.0045214	0.24698	TRUE
hsLibDrugV1Nik_21857	CD40	27.958/0/2.8326	0/16.125/14.161	2.8326	14.161	1.9839	319.67	15.027	2.9223	0.99774	0.0022639	0.0045277	0.24698	TRUE
hsLibDrugV1Nik_01052	ADRB3	215.38/236.01/318.19	439.14/273.05/345.92	236.01	345.92	0.54968	3589.7	1499.5	2.8384	0.99773	0.0022668	0.0045337	0.24698	TRUE
hsLibDrugV1Nik_08924	GSTM3	264.05/393.02/314.41	499.55/406.35/442.01	314.41	442.01	0.4901	4357.3	2021.7	2.8378	0.99773	0.0022712	0.0045423	0.24698	TRUE
hsLibDrugV1Nik_05849	MSR1	556.06/654.7/527.8	727.75/737.44/692.85	556.06	727.75	0.38759	5263.7	3661.6	2.8373	0.99773	0.0022748	0.0045496	0.24698	TRUE
hsLibDrugV1Nik_11369	CTSV	386.24/453.25/365.4	547.49/335.4/527.99	386.24	527.99	0.45	2462.4	2504.9	2.8321	0.99769	0.0023121	0.0046243	0.25038	TRUE
hsLibDrugV1Nik_16022	AKR1B1	6.213/3.9499/8.4977	23.012/25.8/5.0573	6.213	23.012	1.7351	5.1706	34.016	2.8803	0.99768	0.002319	0.004638	0.25038	TRUE
hsLibDrugV1Nik_00738	ADAMTS10	558.13/572.74/554.24	729.67/400.97/990.23	558.13	729.67	0.38602	114.21	3675.8	2.8293	0.99767	0.0023326	0.0046651	0.25125	TRUE
hsLibDrugV1Nik_09996	MANBA	526.03/602.36/473.04	692.27/719.17/591.71	526.03	692.27	0.39553	4317.2	3455.8	2.8279	0.99766	0.0023428	0.0046855	0.25185	TRUE
hsLibDrugV1Nik_06000	COL14A1	286.83/322.9/304.03	406.54/428.92/434.93	304.03	428.92	0.49513	326	1952.2	2.8267	0.99765	0.0023515	0.004703	0.2523	TRUE
hsLibDrugV1Nik_19409	PODNL1	227.81/234.03/268.15	262.72/342.92/365.14	234.03	342.92	0.54922	601.33	1486.5	2.8243	0.99763	0.0023693	0.0047385	0.25271	TRUE
hsLibDrugV1Nik_13516	KCNK1	209.17/290.32/222.83	328.88/284.87/366.15	222.83	328.88	0.55954	2370.7	1412.4	2.8218	0.99761	0.0023876	0.0047751	0.25367	TRUE
hsLibDrugV1Nik_18970	P2RY1	192.6/331.79/240.77	390.24/173.07/350.98	240.77	350.98	0.54187	5302.7	1531	2.8166	0.99757	0.0024264	0.0048527	0.25662	TRUE
hsLibDrugV1Nik_09801	SLC6A1	540.53/516.45/655.26	713.37/708.42/596.76	540.53	708.42	0.38959	6871.9	3555.1	2.8158	0.99757	0.0024331	0.0048662	0.25662	TRUE
hsLibDrugV1Nik_14586	OR51C1P	668.93/578.66/574.06	789.12/646.07/752.53	578.66	752.53	0.37846	4085	3816.7	2.8144	0.99756	0.0024437	0.0048875	0.25662	TRUE
hsLibDrugV1Nik_03103	GLRA2	394.52/406.84/294.59	536.94/434.3/568.44	394.52	536.94	0.44369	5069.8	2560.9	2.8143	0.99756	0.0024442	0.0048883	0.25662	TRUE
hsLibDrugV1Nik_03460	CYP4F2	283.73/358.45/268.15	403.67/436.45/300.41	283.73	403.67	0.50716	2913.4	1816.6	2.8141	0.99755	0.0024459	0.0048917	0.25662	TRUE
hsLibDrugV1Nik_12137	DGCR6	544.67/362.4/331.41	498.59/483.75/567.43	362.4	498.59	0.45917	17091	2344.1	2.8129	0.99754	0.0024551	0.0049103	0.25662	TRUE
hsLibDrugV1Nik_03051	CDK18	529.14/429.55/426.77	672.14/578.34/571.48	429.55	578.34	0.42823	4962.7	2798.2	2.8128	0.99754	0.0024554	0.0049109	0.25662	TRUE
hsLibDrugV1Nik_06914	DEAF1	613.01/498.68/406	671.18/539.64/659.48	498.68	659.48	0.40251	10831	3268.8	2.8125	0.99754	0.0024577	0.0049155	0.25662	TRUE
hsLibDrugV1Nik_10055	PNLIPRP1	420.41/348.58/312.53	511.06/481.6/345.92	348.58	481.6	0.4652	3230	2251	2.8036	0.99747	0.0025268	0.0050536	0.26283	TRUE
hsLibDrugV1Nik_23851	SLC6A9	182.25/177.75/224.72	277.1/232.2/277.14	182.25	277.1	0.60182	911.91	1145.6	2.8024	0.99746	0.0025359	0.0050718	0.26327	TRUE
hsLibDrugV1Nik_05348	NMUR2	284.76/288.34/302.14	421.88/408.5/358.06	288.34	408.5	0.50107	101.58	1847.4	2.7955	0.99741	0.0025912	0.0051823	0.26647	TRUE
hsLibDrugV1Nik_05886	OR51E2	567.45/703.08/788.39	645.29/902.99/894.14	703.08	894.14	0.34636	12837	4675.3	2.7941	0.9974	0.0026019	0.0052038	0.26707	TRUE
hsLibDrugV1Nik_06216	DDX3X	225.74/281.43/276.65	394.08/419.25/260.96	276.65	394.08	0.50889	1307.2	1769.4	2.7917	0.99738	0.0026213	0.0052425	0.26755	TRUE
hsLibDrugV1Nik_26377	NonTargetingGuide071	779.73/738.63/980.06	980.88/928.79/1055	779.73	980.88	0.33072	20911	5207.5	2.7874	0.99734	0.0026563	0.0053126	0.26911	TRUE
hsLibDrugV1Nik_12134	GLIPR1L1	579.88/715.92/600.5	712.41/799.79/775.79	600.5	775.79	0.36896	6873.4	3966.9	2.7832	0.99731	0.0026916	0.0053832	0.27218	TRUE
hsLibDrugV1Nik_11056	GPR62	284.76/283.41/301.19	330.8/426.77/403.57	284.76	403.57	0.50159	135.94	1823.5	2.7823	0.9973	0.0026983	0.0053967	0.2723	TRUE
hsLibDrugV1Nik_07677	GPER1	188.46/258.72/149.18	370.11/222.52/284.22	188.46	284.22	0.59019	3239.5	1186.3	2.7803	0.99728	0.0027155	0.005431	0.27299	TRUE
hsLibDrugV1Nik_01357	NR1D2	305.47/347.59/249.26	428.6/447.2/422.79	305.47	428.6	0.48723	2466.7	1961.8	2.7798	0.99728	0.0027197	0.0054394	0.27299	TRUE
hsLibDrugV1Nik_15393	BOLA3	457.69/390.05/405.06	547.49/446.12/650.37	405.06	547.49	0.43379	1497.8	2632.1	2.7763	0.99725	0.0027492	0.0054985	0.27545	TRUE
hsLibDrugV1Nik_17303	HSD17B1	402.81/492.75/592.95	656.8/555.77/650.37	492.75	650.37	0.3997	9064.5	3228.3	2.7741	0.99723	0.0027673	0.0055346	0.27635	TRUE
hsLibDrugV1Nik_18734	SERPINB6	564.35/613.22/563.68	733.5/644.99/749.5	564.35	733.5	0.37763	1194.6	3718.4	2.774	0.99723	0.0027683	0.0055367	0.27635	TRUE
hsLibDrugV1Nik_01181	PLAUR	700/591.5/593.89	770.9/767.54/608.9	593.89	767.54	0.3695	5632	3921.4	2.773	0.99722	0.002777	0.0055539	0.2767	TRUE
hsLibDrugV1Nik_00823	FCRL4	216.42/225.14/229.44	329.84/326.8/343.9	225.14	329.84	0.54887	47.278	1427.7	2.7707	0.9972	0.0027966	0.0055932	0.27815	TRUE
hsLibDrugV1Nik_25910	MGAM	193.64/155.03/169.01	242.58/299.92/258.94	169.01	258.94	0.61254	400.95	1059.1	2.7633	0.99714	0.0028613	0.0057225	0.28307	TRUE
hsLibDrugV1Nik_18607	FURIN	50.739/116.52/112.36	185.05/124.7/185.1	112.36	185.05	0.71483	1907.1	692.29	2.7629	0.99714	0.0028645	0.005729	0.28307	TRUE
hsLibDrugV1Nik_22739	TNFRSF1B	601.62/568.79/611.83	826.51/615.97/775.79	601.62	775.79	0.36627	591.27	3974.6	2.7626	0.99713	0.0028668	0.0057336	0.28307	TRUE
hsLibDrugV1Nik_11356	PHKG1	121.15/132.32/118.97	241.62/196.72/149.7	121.15	196.72	0.69479	64.757	748.81	2.7616	0.99712	0.0028759	0.0057517	0.28316	TRUE
hsLibDrugV1Nik_10812	FZD9	407.99/454.24/447.54	430.51/596.62/713.08	447.54	596.62	0.41398	804.8	2920.4	2.7586	0.9971	0.0029026	0.0058052	0.28505	TRUE
hsLibDrugV1Nik_21937	ATP4B	434.91/544.1/422.05	418.05/597.69/581.59	434.91	581.59	0.41846	6043.9	2834.5	2.7551	0.99707	0.0029335	0.0058671	0.28706	TRUE
hsLibDrugV1Nik_01486	ESR2	336.54/383.14/337.07	504.34/465.47/383.35	337.07	465.47	0.46445	1061.2	2173.7	2.7539	0.99706	0.0029441	0.0058882	0.28743	TRUE
hsLibDrugV1Nik_20543	DGAT1	263.02/277.48/290.81	430.51/269.82/393.46	277.48	393.46	0.5023	193.43	1775	2.7529	0.99705	0.0029536	0.0059073	0.28747	TRUE
hsLibDrugV1Nik_06210	MLNR	159.47/173.8/170.9	262.72/232.2/260.96	170.9	260.96	0.60779	69.53	1071.4	2.7514	0.99703	0.0029667	0.0059334	0.28823	TRUE
hsLibDrugV1Nik_07546	DBF4	11.39/13.825/11.33	33.559/38.7/17.195	11.39	33.559	1.4798	2.9644	63.909	2.773	0.99699	0.0030088	0.0060177	0.29004	TRUE
hsLibDrugV1Nik_26972	NonTargetingGuide666	304.44/300.19/305.92	391.2/441.82/425.83	304.44	425.83	0.48278	10.099	1954.9	2.7455	0.99698	0.0030209	0.0060418	0.29004	TRUE
hsLibDrugV1Nik_07591	GLP2R	154.29/225.14/231.33	328.88/339.7/266.02	225.14	328.88	0.54469	2529.3	1427.7	2.7453	0.99698	0.0030223	0.0060447	0.29004	TRUE
hsLibDrugV1Nik_19237	SSR2	137.72/82.948/106.69	121.77/194.57/177.01	106.69	177.01	0.72501	763.29	655.98	2.7453	0.99698	0.0030226	0.0060451	0.29004	TRUE
hsLibDrugV1Nik_16255	KCNN4	222.63/225.14/203	190.81/387/325.69	222.63	325.69	0.5468	195.87	1411.1	2.7435	0.99696	0.0030393	0.0060787	0.29063	TRUE
hsLibDrugV1Nik_04898	MRGPRD	451.48/468.06/449.43	600.23/583.72/604.86	451.48	600.23	0.41006	139.64	2947.1	2.74	0.99693	0.0030717	0.0061434	0.29262	TRUE
hsLibDrugV1Nik_23541	PTK7	789.05/927.24/827.11	1036.5/1030.9/955.84	827.11	1030.9	0.31744	5737.5	5537.6	2.7388	0.99692	0.0030831	0.0061662	0.29262	TRUE
hsLibDrugV1Nik_03393	P2RX6	165.68/203.42/138.8	246.42/262.3/253.88	165.68	253.88	0.61273	1073.6	1037.4	2.7384	0.99691	0.003087	0.006174	0.29262	TRUE
hsLibDrugV1Nik_20666	NR1I2	312.72/309.08/376.73	435.31/466.55/399.53	312.72	435.31	0.47587	2055.2	2010.3	2.7341	0.99687	0.0031278	0.0062556	0.29511	TRUE
hsLibDrugV1Nik_13072	KLHL20	282.69/391.04/317.25	363.4/440.75/486.52	317.25	440.75	0.47307	3319.8	2040.7	2.7339	0.99687	0.0031296	0.0062592	0.29511	TRUE
hsLibDrugV1Nik_06845	LRRK1	131.51/228.11/140.68	221.49/185.97/227.58	140.68	221.49	0.65106	3863.5	874.91	2.7319	0.99685	0.0031487	0.0062974	0.29567	TRUE
hsLibDrugV1Nik_03406	JMJD7-PLA2G4B	230.92/292.29/228.49	319.29/335.4/380.31	230.92	335.4	0.53656	1886.5	1465.9	2.7289	0.99682	0.0031772	0.0063544	0.29684	TRUE
hsLibDrugV1Nik_01155	RHAG	409.02/554.96/466.43	944.45/617.04/610.93	466.43	617.04	0.40297	5566.8	3048.9	2.7277	0.99681	0.0031884	0.0063768	0.29706	TRUE
hsLibDrugV1Nik_26606	NonTargetingGuide300	244.38/261.68/250.21	363.4/359.05/329.74	250.21	359.05	0.5193	82.807	1593.6	2.7264	0.9968	0.0032018	0.0064036	0.29767	TRUE
hsLibDrugV1Nik_19993	LRRN3	469.08/574.71/469.26	878.29/542.87/620.03	469.26	620.03	0.4012	5560	3068.1	2.7219	0.99675	0.0032453	0.0064906	0.30046	TRUE
hsLibDrugV1Nik_07590	SAE1	678.25/654.7/1007.4	869.66/797.64/860.76	678.25	860.76	0.34334	54462	4503.4	2.7196	0.99673	0.003268	0.0065359	0.30138	TRUE
hsLibDrugV1Nik_22519	GPR31	840.82/1128.7/831.83	1175.5/1007.3/1044.8	840.82	1044.8	0.31308	41472	5633.4	2.7182	0.99672	0.0032815	0.0065629	0.30212	TRUE
hsLibDrugV1Nik_26932	NonTargetingGuide626	197.78/215.27/210.55	310.66/309.6/251.86	210.55	309.6	0.55402	92.698	1331.5	2.7143	0.99668	0.0033207	0.0066415	0.30403	TRUE
hsLibDrugV1Nik_20070	PZP	745.56/688.27/593.89	894.59/871.82/623.06	688.27	871.82	0.34061	6094.6	4572.7	2.7143	0.99668	0.003321	0.0066419	0.30403	TRUE
hsLibDrugV1Nik_04648	RHD	368.64/403.88/378.62	551.33/307.45/512.81	378.62	512.81	0.4367	368.83	2453.4	2.7093	0.99663	0.0033717	0.0067435	0.30663	TRUE
hsLibDrugV1Nik_06147	SCN1B	118.05/118.5/168.06	191.77/332.17/152.73	118.5	191.77	0.68987	1228.6	731.72	2.7086	0.99662	0.0033784	0.0067568	0.30663	TRUE
hsLibDrugV1Nik_24748	ORM2	392.45/486.83/425.83	479.41/634.24/568.44	425.83	568.44	0.4159	2417.3	2772.9	2.7083	0.99662	0.0033811	0.0067622	0.30663	TRUE
hsLibDrugV1Nik_11916	CYP4F22	324.11/321.92/401.28	447.77/402.05/499.66	324.11	447.77	0.46505	2979.8	2086.7	2.7071	0.99661	0.0033935	0.006787	0.30724	TRUE
hsLibDrugV1Nik_22433	TAC1	647.19/576.69/836.55	825.55/735.29/824.34	647.19	824.34	0.34859	20414	4288.7	2.7052	0.99659	0.0034133	0.0068266	0.30767	TRUE
hsLibDrugV1Nik_02187	SLC29A3	273.37/303.16/483.42	360.52/422.47/495.62	303.16	422.47	0.47746	16692	1946.3	2.7045	0.99658	0.0034203	0.0068405	0.30767	TRUE
hsLibDrugV1Nik_21343	EFEMP2	325.15/276.49/205.83	244.5/390.22/398.52	276.49	390.22	0.49553	3680.1	1768.4	2.7045	0.99658	0.0034208	0.0068416	0.30767	TRUE
hsLibDrugV1Nik_19586	CELA1	1014.8/1034.9/1021.6	1139.1/1245.9/1259.3	1021.6	1245.9	0.28611	111.26	6900.7	2.7002	0.99653	0.0034652	0.0069305	0.30956	TRUE
hsLibDrugV1Nik_13790	CTRC	236.09/288.34/263.43	252.17/374.1/382.33	263.43	374.1	0.50439	683.96	1681.4	2.6989	0.99652	0.0034785	0.0069569	0.30956	TRUE
hsLibDrugV1Nik_18830	ACP1	541.57/571.75/656.21	737.34/813.77/630.14	571.75	737.34	0.36638	4022.2	3769.2	2.6972	0.9965	0.0034966	0.0069931	0.30956	TRUE
hsLibDrugV1Nik_16982	CHI3L2	332.39/424.61/366.34	509.14/317.12/497.64	366.34	497.64	0.44087	2274	2370.6	2.6966	0.9965	0.0035021	0.0070042	0.30956	TRUE
hsLibDrugV1Nik_24581	CXCL17	298.22/461.15/293.64	416.13/292.4/452.13	298.22	416.13	0.47928	13283	1913.4	2.6955	0.99649	0.0035139	0.0070278	0.30956	TRUE
hsLibDrugV1Nik_15758	CCR8	1254/1172.1/1602.3	1613.7/1225.5/1503	1254	1503	0.26117	64004	8543.7	2.6944	0.99647	0.0035257	0.0070513	0.30956	TRUE
hsLibDrugV1Nik_21043	TPH2	268.19/246.87/229.44	213.82/353.67/360.08	246.87	353.67	0.51691	379.32	1571.5	2.6942	0.99647	0.0035281	0.0070562	0.30956	TRUE
hsLibDrugV1Nik_16639	CD46	360.35/357.47/326.69	514.89/486.97/421.78	357.47	486.97	0.44496	477.82	2310.8	2.694	0.99647	0.0035299	0.0070599	0.30956	TRUE
hsLibDrugV1Nik_13809	JAK1	268.19/375.24/246.43	379.7/405.27/213.42	268.19	379.7	0.49999	5966.3	1713.1	2.6939	0.99647	0.0035307	0.0070613	0.30956	TRUE
hsLibDrugV1Nik_09051	RGS12	132.54/196.51/179.4	195.6/269.82/287.26	179.4	269.82	0.58619	1243.9	1126.9	2.6937	0.99647	0.0035332	0.0070664	0.30956	TRUE
hsLibDrugV1Nik_06451	DRAXIN	300.29/483.86/349.35	493.8/477.3/454.15	349.35	477.3	0.44911	10250	2256.2	2.6937	0.99647	0.0035337	0.0070674	0.30956	TRUE
hsLibDrugV1Nik_25865	TNNI3K	688.61/511.51/491.92	749.8/606.29/667.57	511.51	667.57	0.38349	15873	3356.5	2.6936	0.99647	0.003534	0.007068	0.30956	TRUE
hsLibDrugV1Nik_12803	MMP2	995.11/979.58/1272.8	1215.8/1316.9/1007.4	995.11	1215.8	0.2887	38665	6714.4	2.6932	0.99646	0.003539	0.007078	0.30956	TRUE
hsLibDrugV1Nik_23935	TMEM256-PLSCR3	427.66/557.92/583.51	721.04/832.04/502.7	557.92	721.04	0.36942	8811.5	3674.3	2.6909	0.99644	0.0035625	0.007125	0.30956	TRUE
hsLibDrugV1Nik_18759	PTPN11	533.28/673.46/577.84	764.19/743.89/572.49	577.84	743.89	0.36387	5564.1	3811.1	2.6898	0.99643	0.0035748	0.0071496	0.30956	TRUE
hsLibDrugV1Nik_14519	TRPC7	411.09/319.94/356.9	395.04/485.9/499.66	356.9	485.9	0.44405	2151.3	2307	2.6856	0.99638	0.00362	0.0072401	0.30956	TRUE
hsLibDrugV1Nik_00727	CNTN2	238.16/257.73/360.68	386.41/366.57/286.24	257.73	366.57	0.50657	5490.5	1643.6	2.6847	0.99637	0.0036298	0.0072596	0.30956	TRUE
hsLibDrugV1Nik_22310	PCDHB10	534.32/432.51/476.81	492.84/626.72/651.38	476.81	626.72	0.39367	2634.5	3119.6	2.6839	0.99636	0.0036384	0.0072768	0.30956	TRUE
hsLibDrugV1Nik_18005	GGT1	239.2/323.89/254.93	278.06/366.57/363.12	254.93	363.12	0.50865	2501.6	1625	2.6838	0.99636	0.0036395	0.007279	0.30956	TRUE
hsLibDrugV1Nik_09421	AKT1	5.1775/5.9249/16.995	24.93/21.5/8.0917	5.9249	21.5	1.7001	61.557	32.377	2.7372	0.99636	0.0036399	0.0072799	0.30956	TRUE
hsLibDrugV1Nik_22419	VWF	315.83/271.56/235.1	451.61/304.22/383.35	271.56	383.35	0.49585	1644.4	1735.5	2.6834	0.99636	0.0036436	0.0072871	0.30956	TRUE
hsLibDrugV1Nik_02394	CD40LG	399.7/372.28/454.15	603.1/536.42/493.6	399.7	536.42	0.42352	1858.5	2595.9	2.6834	0.99636	0.0036444	0.0072888	0.30956	TRUE
hsLibDrugV1Nik_12376	PLA2G4A	182.25/183.67/112.36	293.4/273.05/212.41	182.25	273.05	0.58063	2443.3	1145.6	2.6827	0.99635	0.0036519	0.0073039	0.30956	TRUE
hsLibDrugV1Nik_16614	SERPINB9	774.55/913.42/830.88	845.69/1030.9/1055	830.88	1030.9	0.31087	4992.3	5564	2.6817	0.99634	0.0036626	0.0073253	0.30998	TRUE
hsLibDrugV1Nik_00349	LATS1	351.03/431.53/366.34	496.67/489.12/518.88	366.34	496.67	0.43807	2241.6	2370.6	2.6768	0.99628	0.0037169	0.0074338	0.31308	TRUE
hsLibDrugV1Nik_26873	NonTargetingGuide567	702.07/828.49/728.91	817.88/1037.4/915.38	728.91	915.38	0.32822	5318.5	4854.4	2.6763	0.99628	0.0037222	0.0074444	0.31308	TRUE
hsLibDrugV1Nik_01598	FIBIN	417.31/453.25/590.12	616.53/598.77/534.05	453.25	598.77	0.40092	10012	2959.2	2.675	0.99626	0.0037361	0.0074722	0.31376	TRUE
hsLibDrugV1Nik_08902	HIST1H1C	564.35/503.61/509.86	590.64/799.79/664.53	509.86	664.53	0.38158	1503.9	3345.2	2.6743	0.99626	0.0037445	0.007489	0.31399	TRUE
hsLibDrugV1Nik_02224	ILK	977.51/745.54/647.71	933.9/1119.1/818.28	745.54	933.9	0.32458	31690	4969.9	2.6718	0.99623	0.0037724	0.0075448	0.31402	TRUE
hsLibDrugV1Nik_07819	ENAM	368.64/233.04/222.83	278.06/367.65/335.81	233.04	335.81	0.52514	9244.9	1479.9	2.6712	0.99622	0.0037786	0.0075571	0.31402	TRUE
hsLibDrugV1Nik_09172	FKBP5	311.68/236.01/227.55	339.43/356.9/337.83	236.01	339.43	0.52241	2899.4	1499.5	2.6707	0.99621	0.003785	0.0075701	0.31402	TRUE
hsLibDrugV1Nik_07876	CCL16	0/0/22.66	10.547/0/7.0803	0.94418	7.0803	2.0552	256.75	4.7947	2.8023	0.9962	0.0038048	0.0076096	0.31402	TRUE
hsLibDrugV1Nik_01097	ENOX2	0/0.98748/0	8.6295/0/7.0803	0.94418	7.0803	2.0552	0.48755	4.7947	2.8023	0.9962	0.0038048	0.0076096	0.31402	TRUE
hsLibDrugV1Nik_06345	GPR132	0/2.9624/0	9.5883/3.225/7.0803	0.94418	7.0803	2.0552	4.388	4.7947	2.8023	0.9962	0.0038048	0.0076096	0.31402	TRUE
hsLibDrugV1Nik_08216	IL17B	8.284/0/0.94418	3.8353/7.5249/7.0803	0.94418	7.0803	2.0552	27.382	4.7947	2.8023	0.9962	0.0038048	0.0076096	0.31402	TRUE
hsLibDrugV1Nik_06363	NUAK2	11.39/0/0	0/12.9/7.0803	0.94418	7.0803	2.0552	64.872	4.7947	2.8023	0.9962	0.0038048	0.0076096	0.31402	TRUE
hsLibDrugV1Nik_04666	GRIK2	424.55/552.99/430.55	628.99/571.89/559.34	430.55	571.89	0.40875	7513.5	2804.9	2.6688	0.99619	0.0038057	0.0076115	0.31402	TRUE
hsLibDrugV1Nik_21501	ENPP5	445.26/404.87/505.14	675.01/589.09/448.08	445.26	589.09	0.40305	2608.5	2904.9	2.6686	0.99619	0.0038083	0.0076167	0.31402	TRUE
hsLibDrugV1Nik_23680	STKLD1	720.71/535.21/539.13	593.51/710.57/697.91	539.13	697.91	0.3718	16493	3545.5	2.6666	0.99617	0.0038307	0.0076613	0.31491	TRUE
hsLibDrugV1Nik_03442	TRHR	717.6/630.01/598.61	664.47/876.12/802.09	630.01	802.09	0.3479	4328.9	4170.2	2.6648	0.99615	0.0038521	0.0077042	0.3162	TRUE
hsLibDrugV1Nik_00506	TNFSF8	312.72/496.7/406.94	472.7/543.94/563.39	406.94	543.94	0.41774	8467.1	2644.9	2.6639	0.99614	0.0038621	0.0077243	0.31654	TRUE
hsLibDrugV1Nik_03204	CA5A	430.77/459.18/425.83	591.6/373.02/571.48	430.77	571.48	0.40697	415.74	2806.4	2.6561	0.99605	0.003952	0.007904	0.32117	TRUE
hsLibDrugV1Nik_13458	SLAMF1	190.53/146.15/166.18	294.36/233.27/251.86	166.18	251.86	0.59694	497.19	1040.6	2.656	0.99605	0.0039535	0.0079069	0.32117	TRUE
hsLibDrugV1Nik_05400	CYP1A1	833.58/788.99/770.45	981.84/983.61/801.08	788.99	981.84	0.31512	1165.7	5272	2.656	0.99605	0.003954	0.007908	0.32117	TRUE
hsLibDrugV1Nik_03600	GRK3	289.94/258.72/239.82	435.31/366.57/360.08	258.72	366.57	0.50107	665.9	1650.1	2.655	0.99604	0.0039649	0.0079298	0.32136	TRUE
hsLibDrugV1Nik_10097	PTP4A2	560.2/635.93/588.23	753.64/609.52/769.73	588.23	753.64	0.35696	1530.6	3882.5	2.6547	0.99603	0.0039692	0.0079384	0.32136	TRUE
hsLibDrugV1Nik_17975	GBA2	532.25/564.84/566.51	695.15/726.69/766.69	564.84	726.69	0.36294	532.46	3721.8	2.6531	0.99601	0.0039877	0.0079753	0.32136	TRUE
hsLibDrugV1Nik_09607	CDCP1	426.63/433.5/582.56	422.84/674.02/574.51	433.5	574.51	0.40549	11133	2825	2.653	0.99601	0.0039885	0.007977	0.32136	TRUE
hsLibDrugV1Nik_10462	SLC22A31	506.36/356.48/423.94	628.03/563.29/419.76	423.94	563.29	0.40919	5671.9	2760.1	2.6525	0.99601	0.0039945	0.0079889	0.32136	TRUE
hsLibDrugV1Nik_08993	TNFAIP2	0/18.762/1.8884	10.547/6.4499/24.275	1.8884	10.547	1.9992	144.14	9.8571	2.7579	0.996	0.004005	0.00801	0.32136	TRUE
hsLibDrugV1Nik_12337	GPR37L1	367.6/399.93/456.04	582.97/405.27/535.07	399.93	535.07	0.41907	2096.8	2597.4	2.6516	0.99599	0.0040059	0.0080118	0.32136	TRUE
hsLibDrugV1Nik_12631	PON1	722.78/790.97/758.18	678.85/980.39/946.73	758.18	946.73	0.32004	1164.2	5057.7	2.6513	0.99599	0.0040094	0.0080187	0.32136	TRUE
hsLibDrugV1Nik_17722	PLIN2	470.12/510.52/462.65	725.83/422.47/616.99	470.12	616.99	0.39151	844.3	3074	2.6491	0.99597	0.0040347	0.0080695	0.32245	TRUE
hsLibDrugV1Nik_01998	PTPN2	630.62/449.3/469.26	664.47/615.97/460.22	469.26	615.97	0.39174	13217	3068.1	2.6486	0.99596	0.0040411	0.0080822	0.32248	TRUE
hsLibDrugV1Nik_07566	DEFB118	820.11/648.77/684.53	862.95/904.07/561.36	684.53	862.95	0.33371	9830.5	4546.9	2.6459	0.99593	0.0040743	0.0081486	0.32371	TRUE
hsLibDrugV1Nik_24900	TUBA1A	377.96/320.93/457.93	545.57/475.15/508.77	377.96	508.77	0.42781	4823.9	2449	2.6433	0.9959	0.0041048	0.0082096	0.32519	TRUE
hsLibDrugV1Nik_01519	OR7G2	463.9/465.1/678.87	497.63/610.59/759.61	465.1	610.59	0.39193	22849	3039.8	2.6389	0.99584	0.0041592	0.0083184	0.32807	TRUE
hsLibDrugV1Nik_09625	NPVF	146.01/130.35/248.32	250.25/184.9/225.56	146.01	225.56	0.62401	5356.8	909.4	2.638	0.99583	0.00417	0.0083401	0.32844	TRUE
hsLibDrugV1Nik_09030	SLPI	3.1065/0.98748/7.5535	17.259/9.6749/14.161	3.1065	14.161	1.8843	12.133	16.541	2.7179	0.99578	0.0042245	0.0084491	0.33178	TRUE
hsLibDrugV1Nik_09853	C8B	304.44/597.42/324.8	715.29/445.05/443.02	324.8	445.05	0.45321	37369	2091.3	2.6294	0.99572	0.0042763	0.0085526	0.33378	TRUE
hsLibDrugV1Nik_02202	SCRG1	295.12/237.98/403.17	409.42/432.15/251.86	295.12	409.42	0.47093	7469.6	1892.6	2.6274	0.9957	0.0043021	0.0086042	0.33497	TRUE
hsLibDrugV1Nik_04919	MRGPRF	333.43/349.57/272.87	294.36/460.1/455.16	333.43	455.16	0.44783	1964	2149.2	2.6258	0.99568	0.0043228	0.0086455	0.3361	TRUE
hsLibDrugV1Nik_14506	ADHFE1	412.13/391.04/393.72	526.4/574.04/470.33	393.72	526.4	0.41804	172.94	2555.5	2.6245	0.99566	0.0043393	0.0086786	0.33645	TRUE
hsLibDrugV1Nik_00038	SLC5A9	760.06/659.63/647.71	925.27/833.12/673.64	659.63	833.12	0.3364	5113.4	4374.7	2.6229	0.99564	0.0043592	0.0087184	0.33749	TRUE
hsLibDrugV1Nik_09181	DMD	656.51/663.58/793.12	808.29/902.99/837.49	663.58	837.49	0.33535	8414.2	4402	2.6212	0.99562	0.0043811	0.0087621	0.3387	TRUE
hsLibDrugV1Nik_07018	NPBWR1	398.67/402.89/506.08	536.94/548.24/477.41	402.89	536.94	0.41349	5333.3	2617.5	2.6202	0.99561	0.0043938	0.0087877	0.33921	TRUE
hsLibDrugV1Nik_05602	TAOK1	660.65/665.56/720.41	850.48/780.44/839.52	665.56	839.52	0.33454	1516.5	4415.6	2.6179	0.99558	0.0044241	0.0088481	0.34084	TRUE
hsLibDrugV1Nik_10746	UQCC3	542.6/538.17/658.1	698.99/704.12/580.58	542.6	698.99	0.36478	6679.4	3569.3	2.6176	0.99557	0.0044274	0.0088548	0.34084	TRUE
hsLibDrugV1Nik_03346	CNGB3	229.88/275.51/224.72	329.84/381.62/315.58	229.88	329.84	0.51897	1054.2	1459	2.6169	0.99556	0.0044372	0.0088744	0.34111	TRUE
hsLibDrugV1Nik_16775	C1QL1	1.0355/5.9249/4.7209	0/18.275/19.218	4.7209	18.275	1.7524	7.5159	25.563	2.6808	0.99555	0.0044531	0.0089061	0.34145	TRUE
hsLibDrugV1Nik_15439	NR2E3	382.1/492.75/396.56	529.27/618.12/263.99	396.56	529.27	0.41557	4731.1	2574.6	2.6155	0.99555	0.0044542	0.0089085	0.34145	TRUE
hsLibDrugV1Nik_21004	HILPDA	24.852/5.9249/0.94418	21.094/39.775/9.1032	5.9249	21.094	1.6738	191.52	32.377	2.6659	0.99549	0.0045101	0.0090202	0.34222	TRUE
hsLibDrugV1Nik_08502	CACNA1B	561.24/783.07/632.6	801.58/873.97/692.85	632.6	801.58	0.34106	13866	4188.1	2.6111	0.99549	0.004513	0.009026	0.34222	TRUE
hsLibDrugV1Nik_14640	PSMA4	540.53/602.36/683.59	767.06/613.82/778.83	602.36	767.06	0.3482	5210.6	3979.7	2.6108	0.99548	0.0045165	0.0090331	0.34222	TRUE
hsLibDrugV1Nik_15605	DERL1	623.37/619.15/704.36	791.03/627.79/841.54	623.37	791.03	0.34316	3288.7	4124.4	2.6107	0.99548	0.004518	0.0090359	0.34222	TRUE
hsLibDrugV1Nik_02304	CAMK1D	244.38/273.53/414.5	383.53/382.7/358.06	273.53	382.7	0.483	10361	1748.6	2.6106	0.99548	0.0045197	0.0090393	0.34222	TRUE
hsLibDrugV1Nik_04303	DNASE1L3	748.67/966.74/633.55	861.03/933.09/943.7	748.67	933.09	0.31732	30404	4991.6	2.6104	0.99548	0.0045222	0.0090443	0.34222	TRUE
hsLibDrugV1Nik_24198	SIGLEC11	719.67/577.67/800.67	900.34/941.69/635.2	719.67	900.34	0.32273	13362	4790.3	2.6104	0.99548	0.0045224	0.0090448	0.34222	TRUE
hsLibDrugV1Nik_27021	NonTargetingGuide715	228.85/216.26/203	321.21/312.82/199.26	216.26	312.82	0.53054	167.11	1369.1	2.6098	0.99547	0.0045299	0.0090599	0.34222	TRUE
hsLibDrugV1Nik_26608	NonTargetingGuide302	454.58/563.85/420.16	628.03/489.12/596.76	454.58	596.76	0.39186	6561.8	2968.2	2.6097	0.99547	0.004531	0.0090619	0.34222	TRUE
hsLibDrugV1Nik_25753	HLA-A	162.57/211.32/148.24	255.05/202.1/245.79	162.57	245.79	0.59333	1290.9	1017.1	2.6092	0.99546	0.0045377	0.0090754	0.34222	TRUE
hsLibDrugV1Nik_23743	SLC29A2	191.57/188.61/249.26	245.46/309.6/282.2	191.57	282.2	0.55645	1668.9	1206.7	2.6091	0.99546	0.0045395	0.0090791	0.34222	TRUE
hsLibDrugV1Nik_01609	MAP2K7	102.51/76.036/144.46	169.71/119.32/167.9	102.51	167.9	0.70637	1230.3	629.25	2.6067	0.99543	0.0045709	0.0091419	0.34392	TRUE
hsLibDrugV1Nik_15356	EDAR	513.61/535.21/684.53	762.27/510.62/689.82	535.21	689.82	0.36551	11382	3518.6	2.6064	0.99543	0.0045747	0.0091494	0.34392	TRUE
hsLibDrugV1Nik_13706	NEK9	417.31/303.16/342.74	496.67/374.1/465.27	342.74	465.27	0.43987	3563.5	2211.7	2.6055	0.99541	0.0045868	0.0091736	0.34435	TRUE
hsLibDrugV1Nik_20072	PZP	22.781/6.9123/2.8326	10.547/49.449/23.264	6.9123	23.264	1.6166	134.23	38.008	2.6523	0.9954	0.004601	0.0092019	0.34479	TRUE
hsLibDrugV1Nik_24301	DEFB126	238.16/422.64/272.87	381.61/242.95/456.17	272.87	381.61	0.4824	11818	1744.2	2.6038	0.99539	0.0046102	0.0092204	0.34479	TRUE
hsLibDrugV1Nik_13429	HCAR3	324.11/315.99/326.69	402.71/471.92/443.02	324.11	443.02	0.4497	36.277	2086.7	2.6031	0.99538	0.0046189	0.0092378	0.34479	TRUE
hsLibDrugV1Nik_09256	CD3G	569.52/657.66/577.84	772.82/738.52/529	577.84	738.52	0.35342	3220	3811.1	2.6027	0.99538	0.0046243	0.0092486	0.34479	TRUE
hsLibDrugV1Nik_25309	FGF22	285.8/236.99/231.33	232.04/340.77/337.83	236.99	337.83	0.50963	1207	1506.1	2.5983	0.99532	0.0046842	0.0093684	0.34768	TRUE
hsLibDrugV1Nik_04244	FKBP8	163.61/190.58/201.11	200.4/280.57/331.76	190.58	280.57	0.55554	419.23	1200.2	2.5975	0.99531	0.0046949	0.0093898	0.34768	TRUE
hsLibDrugV1Nik_15795	CILP	986.83/778.13/707.19	784.32/965.34/1092.4	778.13	965.34	0.31067	24294	5196.4	2.597	0.9953	0.0047018	0.0094036	0.34771	TRUE
hsLibDrugV1Nik_19142	PRKCB	645.12/638.9/805.39	800.62/814.84/839.52	645.12	814.84	0.3365	12863	4274.4	2.596	0.99528	0.0047154	0.0094307	0.34825	TRUE
hsLibDrugV1Nik_19918	IL1RAP	920.56/913.42/1145.3	1124.7/858.92/1296.7	920.56	1124.7	0.28868	25279	6191	2.5945	0.99526	0.0047358	0.0094715	0.34879	TRUE
hsLibDrugV1Nik_24082	GALP	400.74/393.02/457.93	533.11/404.2/610.93	400.74	533.11	0.41088	1665.3	2602.9	2.5945	0.99526	0.0047359	0.0094718	0.34879	TRUE
hsLibDrugV1Nik_10035	DHRS9	625.44/696.17/751.57	872.53/865.37/895.15	696.17	872.53	0.32535	4035.9	4627.4	2.5926	0.99524	0.0047626	0.0095251	0.34937	TRUE
hsLibDrugV1Nik_13362	TIE1	279.58/253.78/283.26	377.78/389.15/415.71	279.58	389.15	0.47558	339.64	1789	2.5903	0.99521	0.0047941	0.0095882	0.35121	TRUE
hsLibDrugV1Nik_24891	INHA	5.1775/7.8998/29.27	3.8353/31.175/25.287	7.8998	25.287	1.5625	232.04	43.673	2.631	0.99518	0.0048155	0.009631	0.3518	TRUE
hsLibDrugV1Nik_09563	CLK2	462.87/596.44/460.76	755.56/605.22/560.35	462.87	605.22	0.38613	8922.4	3024.6	2.5884	0.99518	0.0048216	0.0096433	0.3518	TRUE
hsLibDrugV1Nik_04262	COL7A1	3.1065/5.9249/0	33.559/13.975/0	3.1065	13.975	1.8666	8.7967	16.541	2.6723	0.99516	0.0048449	0.0096898	0.352	TRUE
hsLibDrugV1Nik_22572	REN	926.77/866.02/856.38	1011.6/1063.2/1068.1	866.02	1063.2	0.29559	1892	5809.3	2.5866	0.99515	0.0048464	0.0096927	0.352	TRUE
hsLibDrugV1Nik_11823	STIM2	382.1/219.22/218.11	321.21/242.95/315.58	219.22	315.58	0.52362	13265	1388.6	2.5858	0.99514	0.0048575	0.0097151	0.352	TRUE
hsLibDrugV1Nik_14470	CA2	5.1775/20.737/0.94418	24.93/6.4499/19.218	5.1775	19.218	1.7105	130.01	28.14	2.6468	0.99514	0.0048631	0.0097262	0.352	TRUE
hsLibDrugV1Nik_13398	HTN3	1400/1589.8/1349.2	1653/1640.4/1683.1	1400	1653	0.23953	19308	9582.8	2.5848	0.99513	0.0048724	0.0097448	0.35202	TRUE
hsLibDrugV1Nik_09785	PAH	471.15/535.21/422.05	614.61/730.99/495.62	471.15	614.61	0.38276	3257.3	3081	2.5845	0.99512	0.0048763	0.0097525	0.35202	TRUE
hsLibDrugV1Nik_02026	MYLK	470.12/493.74/494.75	648.17/640.69/436.95	493.74	640.69	0.37522	279.51	3235.1	2.5837	0.99511	0.004887	0.0097741	0.35233	TRUE
hsLibDrugV1Nik_19204	DEFB113	430.77/451.28/387.12	395.04/567.59/630.14	430.77	567.59	0.39715	1163	2806.4	2.5828	0.9951	0.0048998	0.0097995	0.35278	TRUE
hsLibDrugV1Nik_24028	BMP15	171.89/195.52/177.51	263.68/264.45/176	177.51	263.68	0.56826	178	1114.6	2.5811	0.99508	0.0049244	0.0098487	0.35409	TRUE
hsLibDrugV1Nik_08952	KIR3DL3	111.83/182.68/77.423	186.97/179.52/98.112	111.83	179.52	0.67798	3101.9	688.93	2.5789	0.99504	0.0049558	0.0099117	0.35572	TRUE
hsLibDrugV1Nik_22962	KCNJ14	420.41/496.7/397.5	337.51/601.99/555.29	420.41	555.29	0.40062	3172.4	2736.2	2.5786	0.99504	0.0049602	0.0099203	0.35572	TRUE
hsLibDrugV1Nik_01627	ABCB11	580.91/423.63/417.33	586.8/558.99/448.08	423.63	558.99	0.39922	12389	2758	2.5776	0.99503	0.0049743	0.0099485	0.35587	TRUE
hsLibDrugV1Nik_13709	NEK9	236.09/323.89/243.6	389.28/345.07/323.67	243.6	345.07	0.50065	3251.6	1549.8	2.5775	0.99502	0.0049753	0.0099506	0.35587	TRUE
hsLibDrugV1Nik_03119	GPR1	789.05/848.24/706.25	1010.6/976.09/827.38	789.05	976.09	0.30655	5179.7	5272.4	2.5759	0.995	0.0049988	0.0099976	0.3566	TRUE
hsLibDrugV1Nik_01811	CRISP3	148.08/196.51/186	311.62/192.42/274.11	186	274.11	0.55692	774.43	1170.2	2.5755	0.99499	0.0050051	0.01001	0.3566	TRUE
hsLibDrugV1Nik_05555	BMP7	350/225.14/300.25	413.25/367.65/465.27	300.25	413.25	0.45955	4057.9	1926.9	2.5743	0.99498	0.0050218	0.010044	0.35696	TRUE
hsLibDrugV1Nik_05110	VGF	248.52/361.42/260.59	368.19/365.5/261.97	260.59	365.5	0.48646	5155.4	1662.6	2.5727	0.99495	0.0050455	0.010091	0.35761	TRUE
hsLibDrugV1Nik_25725	GPR139	538.46/527.31/467.37	816.92/549.32/678.69	527.31	678.69	0.36349	1858.6	3464.5	2.5719	0.99494	0.0050575	0.010115	0.35797	TRUE
hsLibDrugV1Nik_27108	NonTargetingGuide802	193.64/287.36/258.71	363.4/233.27/363.12	258.71	363.12	0.48752	2527.3	1650	2.5704	0.99492	0.0050798	0.01016	0.35806	TRUE
hsLibDrugV1Nik_15856	ITGA3	499.11/514.47/493.81	539.82/646.07/648.35	499.11	646.07	0.37167	132.09	3271.7	2.5692	0.9949	0.005096	0.010192	0.35806	TRUE
hsLibDrugV1Nik_26133	APH1A	499.11/691.23/520.25	670.22/569.74/760.62	520.25	670.22	0.36482	14842	3416.2	2.5659	0.99486	0.0051447	0.010289	0.36014	TRUE
hsLibDrugV1Nik_01029	NELL2	446.3/474.98/417.33	450.65/608.44/584.63	446.3	584.63	0.38874	830.79	2911.9	2.5634	0.99482	0.0051824	0.010365	0.36074	TRUE
hsLibDrugV1Nik_11255	VASN	305.47/229.09/233.21	331.75/285.95/361.09	233.21	331.75	0.50663	2619.1	1481.1	2.5605	0.99477	0.0052255	0.010451	0.36236	TRUE
hsLibDrugV1Nik_20794	CDH5	624.41/574.71/708.14	792.95/634.24/788.94	624.41	788.94	0.33696	4740.4	4131.6	2.5598	0.99476	0.0052364	0.010473	0.36265	TRUE
hsLibDrugV1Nik_04097	TNNI3	243.34/217.24/234.16	332.71/212.85/341.88	234.16	332.71	0.50498	185.2	1487.3	2.5555	0.9947	0.0053013	0.010603	0.36667	TRUE
hsLibDrugV1Nik_04041	PHF8	364.5/373.27/320.08	464.07/491.27/488.54	364.5	488.54	0.42157	1024.9	2358.2	2.5544	0.99468	0.0053191	0.010638	0.36679	TRUE
hsLibDrugV1Nik_08361	GABRA5	405.92/359.44/300.25	484.21/369.8/482.47	359.44	482.47	0.42366	2831.7	2324.1	2.552	0.99464	0.0053559	0.010712	0.36766	TRUE
hsLibDrugV1Nik_10825	ADAMTS13	404.88/314.02/287.03	428.6/310.67/469.32	314.02	428.6	0.44755	4492.1	2019	2.55	0.99461	0.0053868	0.010774	0.36881	TRUE
hsLibDrugV1Nik_19278	AURKC	558.13/593.47/494.75	677.89/712.72/744.44	558.13	712.72	0.35216	2633	3675.8	2.5497	0.99461	0.0053906	0.010781	0.36881	TRUE
hsLibDrugV1Nik_14256	CHEK2	1711.7/1841.6/1911	1846.7/2129.6/2177.7	1841.6	2129.6	0.20945	10853	12752	2.5496	0.99461	0.005393	0.010786	0.36881	TRUE
hsLibDrugV1Nik_23698	OBSCN	0/2.9624/17.94	13.424/27.95/0	2.9624	13.424	1.864	116.54	15.744	2.6365	0.99458	0.0054235	0.010847	0.37043	TRUE
hsLibDrugV1Nik_16017	ABCC4	8.284/0/7.5535	7.6706/41.925/24.275	7.5535	24.275	1.5631	28.794	41.683	2.59	0.99454	0.0054591	0.010918	0.37187	TRUE
hsLibDrugV1Nik_25820	PGLYRP2	375.89/283.41/381.45	501.47/528.89/416.72	375.89	501.47	0.4149	4291.8	2435	2.5449	0.99453	0.0054651	0.01093	0.37187	TRUE
hsLibDrugV1Nik_24925	PPIL3	673.07/565.82/517.41	825.55/436.45/721.18	565.82	721.18	0.34945	6923.1	3728.5	2.5442	0.99452	0.0054769	0.010954	0.37221	TRUE
hsLibDrugV1Nik_20311	HDC	313.76/192.56/197.33	259.84/287.02/369.19	197.33	287.02	0.53824	6788.4	1244.5	2.5423	0.99449	0.0055062	0.011012	0.37274	TRUE
hsLibDrugV1Nik_12308	ERBB2	198.82/300.19/208.66	311.62/301/200.27	208.66	301	0.52645	4237.2	1319	2.5423	0.99449	0.0055067	0.011013	0.37274	TRUE
hsLibDrugV1Nik_22021	CTSE	298.22/354.5/298.36	395.04/409.57/470.33	298.36	409.57	0.45574	1575.9	1914.3	2.5418	0.99449	0.0055149	0.01103	0.37274	TRUE
hsLibDrugV1Nik_02221	CACNG7	271.3/227.12/219.05	325.04/323.57/218.48	227.12	323.57	0.50875	1008.5	1440.8	2.5411	0.99447	0.0055258	0.011052	0.37274	TRUE
hsLibDrugV1Nik_03670	PROK1	407.99/508.55/318.19	362.44/538.57/564.4	407.99	538.57	0.39976	9088.2	2652	2.5357	0.99439	0.0056108	0.011222	0.37621	TRUE
hsLibDrugV1Nik_00395	MAST1	4.142/26.662/12.274	33.559/43/15.172	12.274	33.559	1.3804	136.57	69.077	2.5609	0.99439	0.0056117	0.011223	0.37621	TRUE
hsLibDrugV1Nik_10694	TMPRSS11D	171.89/187.62/155.79	255.05/294.55/237.69	171.89	255.05	0.56654	253.32	1077.9	2.5328	0.99434	0.0056577	0.011315	0.37883	TRUE
hsLibDrugV1Nik_17278	CRTAC1	1289.2/1136.6/990.45	1366.3/1358.8/998.32	1136.6	1358.8	0.25741	22323	7711.8	2.5303	0.9943	0.0056986	0.011397	0.38064	TRUE
hsLibDrugV1Nik_18089	LEPR	663.75/683.33/849.77	942.53/853.54/726.23	683.33	853.54	0.32045	14042	4538.6	2.5265	0.99424	0.0057602	0.01152	0.38356	TRUE
hsLibDrugV1Nik_09367	SLC22A1	311.68/300.19/404.11	424.76/446.12/257.92	311.68	424.76	0.44533	4337.3	2003.4	2.5263	0.99424	0.0057636	0.011527	0.38356	TRUE
hsLibDrugV1Nik_06963	MCOLN3	225.74/211.32/232.27	321.21/340.77/280.18	225.74	321.21	0.50696	125.28	1431.6	2.5232	0.99418	0.0058154	0.011631	0.38513	TRUE
hsLibDrugV1Nik_16429	CLUL1	543.64/689.26/527.8	728.71/694.44/508.77	543.64	694.44	0.35264	10728	3576.4	2.5217	0.99416	0.0058389	0.011678	0.38622	TRUE
hsLibDrugV1Nik_16844	TG	8.284/32.587/11.33	31.641/32.25/22.252	11.33	31.641	1.4045	230.56	63.557	2.5477	0.99412	0.0058778	0.011756	0.38709	TRUE
hsLibDrugV1Nik_10663	HCAR2	423.52/621.12/377.67	545.57/555.77/660.49	423.52	555.77	0.39125	20574	2757.2	2.5186	0.99411	0.0058911	0.011782	0.38709	TRUE
hsLibDrugV1Nik_26623	NonTargetingGuide317	1101.8/1299.5/1097.1	1319.3/1336.2/1097.4	1101.8	1319.3	0.25979	19563	7465.9	2.5181	0.9941	0.0058995	0.011799	0.38709	TRUE
hsLibDrugV1Nik_12706	SERPINA3	270.27/257.73/310.64	374.9/380.55/234.66	270.27	374.9	0.47065	893.49	1726.9	2.518	0.9941	0.0059017	0.011803	0.38709	TRUE
hsLibDrugV1Nik_16258	ADAMTS4	27.958/6.9123/16.995	16.3/41.925/46.527	16.995	41.925	1.2542	110.93	96.917	2.5323	0.99408	0.0059158	0.011832	0.38734	TRUE
hsLibDrugV1Nik_27073	NonTargetingGuide767	961.98/980.56/1007.4	1185.1/1185.7/834.46	980.56	1185.1	0.27309	534.02	6612.1	2.5155	0.99406	0.0059431	0.011886	0.38786	TRUE
hsLibDrugV1Nik_09825	LAMB2	211.24/209.34/287.98	377.78/303.15/243.76	211.24	303.15	0.51906	2945.9	1336	2.5144	0.99404	0.0059618	0.011924	0.38786	TRUE
hsLibDrugV1Nik_15002	NAT2	794.23/591.5/645.82	810.21/808.39/819.29	645.82	810.21	0.32671	12488	4279.3	2.5129	0.99401	0.0059866	0.011973	0.38786	TRUE
hsLibDrugV1Nik_13894	TUB	131.51/123.43/287.98	203.27/167.7/209.37	131.51	203.27	0.62441	12274	815.57	2.5129	0.99401	0.0059875	0.011975	0.38786	TRUE
hsLibDrugV1Nik_22919	MS4A1	671/576.69/550.46	731.59/646.07/772.76	576.69	731.59	0.34271	4791.8	3803.1	2.5118	0.99399	0.0060064	0.012013	0.38786	TRUE
hsLibDrugV1Nik_16760	NSDHL	13.461/9.8748/7.5535	28.765/0/36.413	9.8748	28.765	1.4526	9.1265	55.085	2.5452	0.99399	0.0060126	0.012025	0.38786	TRUE
hsLibDrugV1Nik_02154	TOP2A	421.45/504.6/428.66	472.7/751.42/561.36	428.66	561.36	0.38831	2909.5	2792.1	2.5114	0.99399	0.0060127	0.012025	0.38786	TRUE
hsLibDrugV1Nik_18696	N/A	550.89/559.9/622.22	712.41/715.94/562.38	559.9	712.41	0.34699	1982.4	3687.9	2.5114	0.99399	0.0060131	0.012026	0.38786	TRUE
hsLibDrugV1Nik_06373	TUBB3	550.89/559.9/622.22	712.41/715.94/562.38	559.9	712.41	0.34699	1982.4	3687.9	2.5114	0.99399	0.0060131	0.012026	0.38786	TRUE
hsLibDrugV1Nik_19785	FREM1	725.88/567.8/554.24	768.02/721.32/686.79	567.8	721.32	0.34472	12588	3742.1	2.5096	0.99396	0.0060434	0.012087	0.3884	TRUE
hsLibDrugV1Nik_15927	TTBK2	484.61/388.08/372.95	513.93/568.67/407.62	388.08	513.93	0.40432	4773.9	2517.3	2.5084	0.99394	0.006064	0.012128	0.3884	TRUE
hsLibDrugV1Nik_08351	SCN7A	419.38/315/286.09	359.56/427.85/435.94	315	427.85	0.44051	5864.9	2025.6	2.5072	0.99392	0.006085	0.01217	0.38866	TRUE
hsLibDrugV1Nik_26640	NonTargetingGuide334	488.76/603.35/757.24	764.19/752.49/761.63	603.35	761.63	0.33561	18407	3986.5	2.507	0.99391	0.0060888	0.012178	0.38866	TRUE
hsLibDrugV1Nik_01443	KLK9	4.142/0.98748/2.8326	8.6295/12.9/15.172	2.8326	12.9	1.8587	2.5595	15.027	2.597	0.99387	0.0061256	0.012251	0.38915	TRUE
hsLibDrugV1Nik_26785	NonTargetingGuide479	538.46/538.17/595.78	687.48/729.92/665.54	538.46	687.48	0.3519	1642.9	3540.9	2.5043	0.99387	0.0061343	0.012269	0.38915	TRUE
hsLibDrugV1Nik_23480	PIK3R4	85.946/181.7/159.57	212.86/238.65/284.22	159.57	238.65	0.57774	2954.8	997.53	2.5038	0.99386	0.0061428	0.012286	0.38915	TRUE
hsLibDrugV1Nik_24070	PON2	336.54/312.04/387.12	383.53/592.32/453.14	336.54	453.14	0.42808	1579.1	2170.1	2.503	0.99384	0.0061573	0.012315	0.38915	TRUE
hsLibDrugV1Nik_10125	C2	486.68/586.56/522.13	693.23/668.64/563.39	522.13	668.64	0.35621	2703.7	3429.1	2.5019	0.99382	0.006176	0.012352	0.38915	TRUE
hsLibDrugV1Nik_01425	FAM20A	393.49/469.05/375.79	443.94/571.89/519.89	393.49	519.89	0.401	3011.5	2553.9	2.5013	0.99381	0.0061876	0.012375	0.38915	TRUE
hsLibDrugV1Nik_14602	DPP10	818.04/910.45/832.77	1062.4/836.34/1019.6	832.77	1019.6	0.29163	3125.7	5577.1	2.5012	0.99381	0.0061895	0.012379	0.38915	TRUE
hsLibDrugV1Nik_09711	CSN3	209.17/192.56/264.37	300.11/303.15/284.22	209.17	300.11	0.51874	1661.6	1322.4	2.5009	0.99381	0.0061947	0.012389	0.38915	TRUE
hsLibDrugV1Nik_15459	CPA3	14.497/4.9374/3.7767	18.218/24.725/8.0917	4.9374	18.218	1.6945	46.366	26.783	2.5661	0.9938	0.0061956	0.012391	0.38915	TRUE
hsLibDrugV1Nik_25186	MINK1	430.77/471.03/504.19	609.81/522.44/663.52	471.03	609.81	0.37187	1360.5	3080.2	2.5007	0.9938	0.0061969	0.012394	0.38915	TRUE
hsLibDrugV1Nik_10331	GRID1	449.41/331.79/365.4	355.73/486.97/490.56	365.4	486.97	0.41338	4093.3	2364.3	2.5002	0.99379	0.0062057	0.012411	0.38915	TRUE
hsLibDrugV1Nik_20617	FKBP11	751.77/755.42/720.41	1063.3/928.79/909.31	751.77	928.79	0.30469	498.34	5013.1	2.5001	0.99379	0.0062072	0.012414	0.38915	TRUE
hsLibDrugV1Nik_10290	CLPSL2	4.142/8.8873/3.7767	16.3/4.3/18.206	4.142	16.3	1.7504	11.326	22.311	2.574	0.99379	0.0062077	0.012415	0.38915	TRUE
hsLibDrugV1Nik_27115	NonTargetingGuide809	345.86/353.52/422.99	507.22/473/398.52	353.52	473	0.41902	2443	2284.2	2.4999	0.99379	0.0062116	0.012423	0.38915	TRUE
hsLibDrugV1Nik_13933	RNASE3	193.64/158/151.07	165.88/236.5/249.83	158	236.5	0.57892	659.17	987.3	2.4983	0.99376	0.0062387	0.012477	0.3904	TRUE
hsLibDrugV1Nik_26755	NonTargetingGuide449	88.017/115.53/96.307	177.38/156.95/116.32	96.307	156.95	0.69884	219.21	589.63	2.4974	0.99374	0.0062562	0.012512	0.39104	TRUE
hsLibDrugV1Nik_00320	CHRNA2	1.0355/17.775/0	4.7941/12.9/7.0803	1.0355	7.0803	1.989	140.63	5.2777	2.6312	0.99369	0.0063121	0.012624	0.39189	TRUE
hsLibDrugV1Nik_05496	PARP1	1.0355/18.762/0	5.753/18.275/7.0803	1.0355	7.0803	1.989	157.65	5.2777	2.6312	0.99369	0.0063121	0.012624	0.39189	TRUE
hsLibDrugV1Nik_24592	FCGR2A	1.0355/0/0	6.7118/7.5249/1.0115	0.94418	6.7118	1.9879	0.53613	4.7947	2.634	0.99367	0.0063273	0.012655	0.39189	TRUE
hsLibDrugV1Nik_05796	MAP4K5	0/0.98748/0	6.7118/19.35/0	0.94418	6.7118	1.9879	0.48755	4.7947	2.634	0.99367	0.0063273	0.012655	0.39189	TRUE
hsLibDrugV1Nik_18277	PTGDS	176.03/160.96/186	258.88/290.25/158.8	176.03	258.88	0.55383	163.34	1105	2.4924	0.99366	0.0063447	0.012689	0.39236	TRUE
hsLibDrugV1Nik_12770	FABP4	760.06/670.5/804.45	794.87/937.39/976.06	760.06	937.39	0.30219	4995.7	5070.7	2.4903	0.99362	0.0063809	0.012762	0.39314	TRUE
hsLibDrugV1Nik_22321	TRBV7-1	202.96/147.13/134.07	224.37/222.52/207.35	147.13	222.52	0.59352	1643.4	916.72	2.4899	0.99361	0.0063882	0.012776	0.39314	TRUE
hsLibDrugV1Nik_01334	CLCN4	675.14/495.71/345.57	637.62/641.77/623.06	495.71	637.62	0.36255	27369	3248.5	2.4898	0.99361	0.006391	0.012782	0.39314	TRUE
hsLibDrugV1Nik_27084	NonTargetingGuide778	542.6/710/462.65	691.31/694.44/539.11	542.6	691.31	0.34888	17206	3569.3	2.4892	0.9936	0.0064013	0.012803	0.39314	TRUE
hsLibDrugV1Nik_20943	PLD1	230.92/156.02/173.73	245.46/273.05/255.9	173.73	255.9	0.55608	1791.9	1089.9	2.489	0.99359	0.0064052	0.01281	0.39314	TRUE
hsLibDrugV1Nik_08405	VIP	516.71/565.82/470.2	661.59/719.17/589.68	516.71	661.59	0.35596	2287.5	3392	2.4875	0.99357	0.0064314	0.012863	0.39338	TRUE
hsLibDrugV1Nik_05124	IL9	461.83/562.86/645.82	714.33/594.47/767.7	562.86	714.33	0.34326	8544.7	3708.2	2.4873	0.99356	0.0064354	0.012871	0.39338	TRUE
hsLibDrugV1Nik_17919	GUCY1B3	522.93/473.99/501.36	457.36/643.92/652.4	501.36	643.92	0.36039	607.17	3287.1	2.4865	0.99355	0.0064512	0.012902	0.39338	TRUE
hsLibDrugV1Nik_21180	TAC4	182.25/207.37/191.67	278.06/223.6/297.37	191.67	278.06	0.53445	167.64	1207.4	2.4863	0.99355	0.0064544	0.012909	0.39338	TRUE
hsLibDrugV1Nik_11502	KBTBD8	533.28/657.66/422.05	613.65/680.47/691.84	533.28	680.47	0.35105	13921	3505.4	2.486	0.99354	0.0064597	0.012919	0.39338	TRUE
hsLibDrugV1Nik_12287	ACTN2	626.48/479.91/461.71	569.54/619.19/673.64	479.91	619.19	0.36694	10906	3140.7	2.4853	0.99353	0.0064726	0.012945	0.39373	TRUE
hsLibDrugV1Nik_05800	GLA	698.96/774.18/856.38	762.27/972.87/952.8	774.18	952.8	0.29915	6207	5168.9	2.4844	0.99351	0.0064876	0.012975	0.39377	TRUE
hsLibDrugV1Nik_15060	ATRN	609.91/577.67/638.27	794.87/767.54/683.75	609.91	767.54	0.33117	921.71	4031.7	2.4826	0.99348	0.0065214	0.013043	0.39538	TRUE
hsLibDrugV1Nik_10085	SGSH	283.73/175.77/197.33	284.77/290.25/232.64	197.33	284.77	0.52693	3964.3	1244.5	2.4785	0.9934	0.0065965	0.013193	0.39732	TRUE
hsLibDrugV1Nik_02505	IL22	124.26/136.27/182.23	197.52/278.42/208.36	136.27	208.36	0.60897	1128.1	846.35	2.478	0.99339	0.0066061	0.013212	0.39732	TRUE
hsLibDrugV1Nik_10977	KCNJ5	331.36/470.04/322.91	445.85/436.45/447.07	331.36	445.85	0.42706	9651.6	2135.3	2.4778	0.99339	0.0066106	0.013221	0.39732	TRUE
hsLibDrugV1Nik_25487	ABCC9	772.48/800.84/917.75	869.66/992.21/982.13	800.84	982.13	0.29407	7235.5	5354.5	2.4775	0.99338	0.0066152	0.01323	0.39732	TRUE
hsLibDrugV1Nik_20450	FKTN	438.02/698.15/460.76	516.81/596.62/643.29	460.76	596.62	0.37208	28434	3010.3	2.4762	0.99336	0.0066403	0.013281	0.39816	TRUE
hsLibDrugV1Nik_10642	MMP24	373.81/325.87/298.36	439.14/571.89/306.47	325.87	439.14	0.42927	1527.8	2098.5	2.4728	0.9933	0.006703	0.013406	0.40087	TRUE
hsLibDrugV1Nik_15456	CPA3	321/246.87/266.26	279.02/455.8/368.17	266.26	368.17	0.46606	1686.5	1700.3	2.4716	0.99327	0.0067259	0.013452	0.40108	TRUE
hsLibDrugV1Nik_10970	IGLV1-44	378.99/268.59/250.21	386.41/370.87/363.12	268.59	370.87	0.46402	6263	1715.8	2.4692	0.99323	0.0067714	0.013543	0.40327	TRUE
hsLibDrugV1Nik_06177	PMCH	549.85/563.85/595.78	714.33/569.74/734.32	563.85	714.33	0.34074	607.81	3715	2.4689	0.99322	0.0067774	0.013555	0.40327	TRUE
hsLibDrugV1Nik_04184	OR2T34	329.29/489.79/321.02	442.98/430/453.14	329.29	442.98	0.42676	12914	2121.4	2.4684	0.99321	0.0067865	0.013573	0.40334	TRUE
hsLibDrugV1Nik_24545	SULT1C2	152.22/202.43/156.73	233.95/179.52/252.87	156.73	233.95	0.57488	1054.3	979.1	2.4678	0.9932	0.0067969	0.013594	0.40334	TRUE
hsLibDrugV1Nik_02700	GALK1	303.4/427.58/292.7	412.3/457.95/391.44	303.4	412.3	0.4412	7767.1	1948	2.4673	0.99319	0.0068075	0.013615	0.40334	TRUE
hsLibDrugV1Nik_13517	KCNK1	219.53/231.07/198.28	385.45/308.52/311.53	219.53	311.53	0.50306	292.34	1390.6	2.4672	0.99319	0.0068081	0.013616	0.40334	TRUE
hsLibDrugV1Nik_16856	SIRT1	542.6/546.07/739.3	772.82/578.34/693.87	546.07	693.87	0.345	18673	3593.1	2.4656	0.99316	0.0068398	0.01368	0.4038	TRUE
hsLibDrugV1Nik_14467	CA2	667.9/594.46/612.78	977.05/769.69/725.22	612.78	769.69	0.32844	1686.9	4051.4	2.4653	0.99315	0.0068455	0.013691	0.4038	TRUE
hsLibDrugV1Nik_03451	FOLR1	664.79/532.25/556.12	648.17/705.19/708.03	556.12	705.19	0.34206	6189.1	3662	2.4634	0.99312	0.0068822	0.013764	0.40421	TRUE
hsLibDrugV1Nik_23723	EP300	151.18/222.18/112.36	295.32/226.82/191.17	151.18	226.82	0.58211	3274.1	943.01	2.4632	0.99311	0.0068858	0.013772	0.40421	TRUE
hsLibDrugV1Nik_14203	BACE1	439.05/489.79/333.3	549.41/570.82/602.83	439.05	570.82	0.37789	6879.1	2862.7	2.4628	0.99311	0.0068934	0.013787	0.40421	TRUE
hsLibDrugV1Nik_04640	CDK5R1	465.97/524.35/389.95	624.2/457.95/601.82	465.97	601.82	0.36839	4593.8	3045.8	2.4615	0.99308	0.0069173	0.013835	0.40441	TRUE
hsLibDrugV1Nik_02828	TGFB3	521.89/625.07/797.84	783.36/709.49/789.95	625.07	783.36	0.32519	20247	4136.2	2.4612	0.99308	0.0069227	0.013845	0.40441	TRUE
hsLibDrugV1Nik_02315	MUC5AC	982.69/833.43/907.36	1149.6/898.69/1099.5	907.36	1099.5	0.27677	5570	6098.6	2.4599	0.99305	0.0069488	0.013898	0.40519	TRUE
hsLibDrugV1Nik_00222	FGF4	588.16/404.87/358.79	493.8/590.17/531.02	404.87	531.02	0.39048	17861	2630.9	2.4595	0.99304	0.0069557	0.013911	0.40519	TRUE
hsLibDrugV1Nik_13171	CHRNB2	53.846/122.45/74.591	159.17/126.85/70.803	74.591	126.85	0.75816	1360.3	451.89	2.4583	0.99302	0.0069811	0.013962	0.40519	TRUE
hsLibDrugV1Nik_08835	FSTL4	358.28/458.19/315.36	476.54/499.87/359.07	358.28	476.54	0.4105	5911.9	2316.3	2.4571	0.993	0.0070035	0.014007	0.40519	TRUE
hsLibDrugV1Nik_24406	GPR39	473.22/352.53/364.46	320.25/483.75/484.49	364.46	483.75	0.40753	5986.3	2357.9	2.4566	0.99299	0.0070124	0.014025	0.40519	TRUE
hsLibDrugV1Nik_27220	NonTargetingGuide914	491.86/558.91/503.25	644.33/658.97/612.95	503.25	644.33	0.3559	1613.9	3300	2.4559	0.99297	0.0070262	0.014052	0.40519	TRUE
hsLibDrugV1Nik_06439	BRAF	876.03/816.64/1089.6	1064.3/1083.6/740.39	876.03	1064.3	0.28056	24567	5879.3	2.4553	0.99296	0.0070376	0.014075	0.40519	TRUE
hsLibDrugV1Nik_11418	EFNA5	164.64/201.45/180.34	227.24/270.9/262.98	180.34	262.98	0.54174	345.89	1133.1	2.4551	0.99296	0.007043	0.014086	0.40519	TRUE
hsLibDrugV1Nik_10826	ITGA2	555.03/596.44/605.22	799.66/489.12/750.51	596.44	750.51	0.33101	895.93	3938.9	2.4549	0.99295	0.007046	0.014092	0.40519	TRUE
hsLibDrugV1Nik_01531	SHH	540.53/533.24/626.94	440.1/692.29/686.79	540.53	686.79	0.34492	3759.8	3555.1	2.4529	0.99292	0.0070846	0.014169	0.40541	TRUE
hsLibDrugV1Nik_16628	CRHR1	409.02/331.79/339.91	386.41/454.72/465.27	339.91	454.72	0.41877	2421.4	2192.7	2.4519	0.99289	0.0071051	0.01421	0.40541	TRUE
hsLibDrugV1Nik_09141	CACNA1F	0/37.524/3.7767	0.95883/18.275/15.172	3.7767	15.172	1.7594	576.57	20.268	2.5311	0.99289	0.0071124	0.014225	0.40541	TRUE
hsLibDrugV1Nik_15942	COL5A2	164.64/118.5/128.41	197.52/202.1/151.72	128.41	197.52	0.61733	705.62	795.56	2.4502	0.99286	0.007139	0.014278	0.40541	TRUE
hsLibDrugV1Nik_10975	IGLV5-45	644.08/728.76/594.84	807.33/642.84/804.12	644.08	804.12	0.31972	4797.6	4267.3	2.4499	0.99285	0.0071457	0.014291	0.40541	TRUE
hsLibDrugV1Nik_09190	PDPK1	417.31/552/468.32	380.65/662.19/603.85	468.32	603.85	0.36601	4802.5	3061.7	2.4494	0.99284	0.0071556	0.014311	0.40541	TRUE
hsLibDrugV1Nik_24961	VRK2	752.81/753.44/729.85	926.23/944.92/747.47	752.81	926.23	0.29873	263.61	5020.3	2.4476	0.99281	0.0071913	0.014383	0.40646	TRUE
hsLibDrugV1Nik_15535	MAN1B1	516.71/628.03/575.01	732.54/725.62/657.45	575.01	725.62	0.33511	3105	3791.6	2.4459	0.99278	0.0072245	0.014449	0.40646	TRUE
hsLibDrugV1Nik_05988	FMO5	371.74/355.49/343.68	472.7/554.69/456.17	355.49	472.7	0.41011	201.79	2297.5	2.4453	0.99276	0.007236	0.014472	0.40646	TRUE
hsLibDrugV1Nik_05527	DHRS2	614.05/693.21/739.3	859.11/638.54/932.57	693.21	859.11	0.30915	4195	4606.9	2.4442	0.99274	0.0072577	0.014515	0.40646	TRUE
hsLibDrugV1Nik_00566	ADAM9	181.21/143.18/305.92	263.68/292.4/193.19	181.21	263.68	0.53862	8498.6	1138.8	2.4437	0.99273	0.0072693	0.014539	0.40646	TRUE
hsLibDrugV1Nik_17446	NOV	604.73/742.58/635.44	793.91/803.02/718.14	635.44	793.91	0.32077	6211.5	4207.6	2.4431	0.99272	0.0072813	0.014563	0.40646	TRUE
hsLibDrugV1Nik_11814	NEK3	438.02/402.89/436.21	591.6/555.77/566.42	436.21	566.42	0.37608	556.84	2843.4	2.4418	0.99269	0.0073062	0.014612	0.40646	TRUE
hsLibDrugV1Nik_26484	NonTargetingGuide178	326.18/335.74/404.11	450.65/449.35/366.15	335.74	449.35	0.41939	2382.9	2164.7	2.4417	0.99269	0.0073094	0.014619	0.40646	TRUE
hsLibDrugV1Nik_19518	PLA2G5	205.03/283.41/365.4	417.09/325.72/387.39	283.41	387.39	0.44956	6433	1814.4	2.4412	0.99268	0.0073194	0.014639	0.40646	TRUE
hsLibDrugV1Nik_16388	SERPINC1	480.47/537.19/487.2	471.74/699.82/625.09	487.2	625.09	0.35889	1272	3190.4	2.4412	0.99268	0.0073199	0.01464	0.40646	TRUE
hsLibDrugV1Nik_14834	CDH13	1121.4/1295.6/1141.5	1323.2/1414.7/1356.4	1141.5	1356.4	0.2486	12067	7746.7	2.4411	0.99268	0.0073209	0.014642	0.40646	TRUE
hsLibDrugV1Nik_03625	BTN3A3	447.34/485.84/439.99	579.13/652.52/543.16	447.34	579.13	0.3718	768.21	2919	2.4394	0.99265	0.0073549	0.01471	0.40646	TRUE
hsLibDrugV1Nik_10150	CYP4A22	1005.5/850.22/871.48	1093.1/862.14/1058	871.48	1058	0.2795	9202.3	5847.5	2.439	0.99264	0.0073632	0.014726	0.40646	TRUE
hsLibDrugV1Nik_24931	AMOT	797.33/628.03/593.89	785.28/646.07/792.99	628.03	785.28	0.3219	14914	4156.6	2.439	0.99264	0.0073642	0.014728	0.40646	TRUE
hsLibDrugV1Nik_26237	COL18A1	297.19/336.73/296.47	403.67/413.87/276.13	297.19	403.67	0.44051	782.01	1906.4	2.4387	0.99263	0.0073711	0.014742	0.40646	TRUE
hsLibDrugV1Nik_00263	SOSTDC1	528.1/487.81/447.54	657.76/625.64/541.13	487.81	625.64	0.35836	1622.5	3194.6	2.4386	0.99263	0.0073726	0.014745	0.40646	TRUE
hsLibDrugV1Nik_20471	LSS	134.61/191.57/259.65	274.22/276.27/288.27	191.57	276.27	0.52592	3939.4	1206.7	2.4383	0.99262	0.0073776	0.014755	0.40646	TRUE
hsLibDrugV1Nik_18777	CXCL16	424.55/355.49/329.52	531.19/363.35/472.35	355.49	472.35	0.40905	2722.1	2297.5	2.4381	0.99262	0.0073828	0.014766	0.40646	TRUE
hsLibDrugV1Nik_03999	OPN1LW	220.56/104.67/253.04	311.62/236.5/312.54	220.56	311.62	0.4967	7242.6	1397.5	2.4358	0.99257	0.0074287	0.014857	0.40792	TRUE
hsLibDrugV1Nik_04237	KIT	89.053/66.161/67.037	116.02/84.924/128.46	67.037	116.02	0.78234	242.73	404.35	2.4358	0.99257	0.0074316	0.014863	0.40792	TRUE
hsLibDrugV1Nik_14589	OR51C1P	221.6/220.21/231.33	396.95/312.82/226.57	221.6	312.82	0.49551	48.288	1404.3	2.4344	0.99254	0.007459	0.014918	0.40792	TRUE
hsLibDrugV1Nik_02738	CPT1B	156.36/221.19/197.33	192.72/309.6/283.21	197.33	283.21	0.51902	1124.1	1244.5	2.4343	0.99254	0.0074612	0.014922	0.40792	TRUE
hsLibDrugV1Nik_09078	DDR1	497.04/531.26/720.41	394.08/675.09/679.71	531.26	675.09	0.34509	18475	3491.6	2.4341	0.99254	0.007464	0.014928	0.40792	TRUE
hsLibDrugV1Nik_03424	GZMM	27.958/7.8998/0	4.7941/31.175/24.275	7.8998	24.275	1.5059	232.38	43.673	2.4779	0.99253	0.0074744	0.014949	0.40792	TRUE
hsLibDrugV1Nik_00960	IGFBP2	491.86/511.51/482.48	629.95/504.17/654.42	491.86	629.95	0.35634	237.1	3222.2	2.4326	0.99251	0.0074946	0.014989	0.40792	TRUE
hsLibDrugV1Nik_26197	TFF2	276.48/279.46/257.76	378.74/419.25/224.55	276.48	378.74	0.45263	179.57	1768.3	2.4318	0.99249	0.0075121	0.015024	0.40792	TRUE
hsLibDrugV1Nik_23547	CHI3L1	552.96/607.3/727.97	761.31/804.09/689.82	607.3	761.31	0.3256	8757	4013.7	2.431	0.99247	0.007529	0.015058	0.40792	TRUE
hsLibDrugV1Nik_23154	TGM1	232.99/273.53/361.62	378.74/375.17/354.01	273.53	375.17	0.45442	4702	1748.6	2.4306	0.99246	0.0075366	0.015073	0.40792	TRUE
hsLibDrugV1Nik_22449	GRK6	388.31/299.21/315.36	433.39/283.8/424.82	315.36	424.82	0.42867	2791.6	2028	2.4306	0.99246	0.007537	0.015074	0.40792	TRUE
hsLibDrugV1Nik_08435	PRKCZ	829.43/813.68/888.48	1153.5/962.12/1010.5	829.43	1010.5	0.28449	1867.2	5553.9	2.429	0.99243	0.00757	0.01514	0.40792	TRUE
hsLibDrugV1Nik_06919	ABCC8	182.25/339.69/164.29	310.66/264.45/245.79	182.25	264.45	0.53463	12556	1145.6	2.4286	0.99242	0.0075791	0.015158	0.40792	TRUE
hsLibDrugV1Nik_15948	BCL2L10	661.68/447.33/564.62	446.81/712.72/747.47	564.62	712.72	0.33551	11590	3720.3	2.428	0.99241	0.0075907	0.015181	0.40792	TRUE
hsLibDrugV1Nik_12628	PON1	192.6/238.97/155.79	250.25/299.92/277.14	192.6	277.14	0.52272	1752.5	1213.5	2.4268	0.99238	0.0076154	0.015231	0.40792	TRUE
hsLibDrugV1Nik_18604	FURIN	211.24/211.32/169.01	330.8/299.92/197.24	211.24	299.92	0.50368	891.8	1336	2.4262	0.99237	0.0076296	0.015259	0.40792	TRUE
hsLibDrugV1Nik_03440	TRHR	346.89/388.08/517.41	347.1/522.44/509.78	388.08	509.78	0.39264	9211.9	2517.3	2.4256	0.99236	0.007641	0.015282	0.40792	TRUE
hsLibDrugV1Nik_12710	SERPINA3	141.86/117.51/211.5	225.32/213.92/190.16	141.86	213.92	0.58918	2721	882.55	2.4256	0.99236	0.0076412	0.015282	0.40792	TRUE
hsLibDrugV1Nik_25544	GYPC	556.06/706.05/548.57	702.82/698.74/715.11	556.06	702.82	0.33737	11275	3661.6	2.4253	0.99235	0.0076474	0.015295	0.40792	TRUE
hsLibDrugV1Nik_10233	PODN	254.73/228.11/210.55	266.55/320.35/377.28	228.11	320.35	0.48811	508.53	1447.3	2.4246	0.99234	0.0076626	0.015325	0.40825	TRUE
hsLibDrugV1Nik_19474	PROK2	2.071/6.9123/3.7767	5.753/15.05/16.183	3.7767	15.05	1.7485	6.3707	20.268	2.504	0.99232	0.0076818	0.015364	0.40888	TRUE
hsLibDrugV1Nik_12723	IGLV1-51	750.74/694.2/662.82	908.97/579.42/858.73	694.2	858.73	0.30647	2090.7	4613.8	2.4224	0.99229	0.0077097	0.015419	0.40888	TRUE
hsLibDrugV1Nik_17317	NAGLU	288.9/279.46/348.4	393.12/393.45/177.01	288.9	393.12	0.44306	1814.8	1851.1	2.4222	0.99229	0.007713	0.015426	0.40888	TRUE
hsLibDrugV1Nik_09587	PRB2	725.88/851.2/1162.3	1051.8/1034.1/843.56	851.2	1034.1	0.28055	56240	5705.8	2.4218	0.99228	0.0077219	0.015444	0.40888	TRUE
hsLibDrugV1Nik_07962	CA6	316.86/470.04/385.23	506.26/551.47/367.16	385.23	506.26	0.39328	5933.3	2498.1	2.4216	0.99227	0.0077259	0.015452	0.40888	TRUE
hsLibDrugV1Nik_00475	NECTIN3	10.355/5.9249/17.94	0/29.025/42.482	10.355	29.025	1.4028	38.576	57.875	2.4541	0.99227	0.0077327	0.015465	0.40888	TRUE
hsLibDrugV1Nik_20854	WISP3	608.87/653.71/670.37	813.09/767.54/819.29	653.71	813.09	0.31433	1143.9	4333.8	2.421	0.99226	0.0077391	0.015478	0.40888	TRUE
hsLibDrugV1Nik_01675	NCOR2	589.2/592.49/657.15	788.16/743.89/665.54	592.49	743.89	0.32782	2096.3	3911.8	2.4208	0.99226	0.0077431	0.015486	0.40888	TRUE
hsLibDrugV1Nik_17443	OR8H3	838.75/605.32/646.77	834.18/755.72/805.13	646.77	805.13	0.31553	19288	4285.8	2.419	0.99222	0.0077824	0.015565	0.41022	TRUE
hsLibDrugV1Nik_12250	OXT	450.44/373.27/483.42	333.67/581.57/591.71	450.44	581.57	0.36789	3521.9	2940.1	2.4183	0.9922	0.0077962	0.015592	0.41055	TRUE
hsLibDrugV1Nik_03107	SERPINB13	908.13/802.82/798.78	979.92/1005.1/847.61	802.82	979.92	0.28727	5553.7	5368.3	2.4172	0.99218	0.0078204	0.015641	0.41089	TRUE
hsLibDrugV1Nik_00594	ABCC2	602.66/716.91/625.05	780.49/523.52/915.38	625.05	780.49	0.31994	4469.5	4136	2.4169	0.99217	0.0078265	0.015653	0.41089	TRUE
hsLibDrugV1Nik_18743	ABCC10	202.96/239.96/229.44	304.91/383.77/321.65	229.44	321.65	0.48558	405.91	1456.1	2.4165	0.99216	0.0078358	0.015672	0.41089	TRUE
hsLibDrugV1Nik_19468	AADAT	690.68/503.61/521.19	662.55/558.99/726.23	521.19	662.55	0.34563	14517	3422.6	2.4163	0.99216	0.0078402	0.01568	0.41089	TRUE
hsLibDrugV1Nik_02513	PRKD2	605.77/641.86/561.79	758.43/773.99/687.8	605.77	758.43	0.32378	1618.3	4003.2	2.4129	0.99209	0.0079127	0.015825	0.4118	TRUE
hsLibDrugV1Nik_12548	HNMT	3.1065/2.9624/0	25.888/12.9/7.0803	2.9624	12.9	1.8106	4.3984	15.744	2.5045	0.99206	0.0079391	0.015878	0.4118	TRUE
hsLibDrugV1Nik_19566	CSNK1D	398.67/277.48/280.42	382.57/333.25/450.1	280.42	382.57	0.44676	6995.2	1794.6	2.4113	0.99205	0.0079471	0.015894	0.4118	TRUE
hsLibDrugV1Nik_05009	TLR8	335.5/403.88/456.04	527.36/546.09/435.94	403.88	527.36	0.38402	3698.2	2624.2	2.4104	0.99203	0.0079671	0.015934	0.4118	TRUE
hsLibDrugV1Nik_20265	DMKN	668.93/628.03/628.83	784.32/789.04/581.59	628.83	784.32	0.31833	804.52	4162	2.4102	0.99203	0.0079709	0.015942	0.4118	TRUE
hsLibDrugV1Nik_10578	PDCD4	309.61/308.09/317.25	417.09/543.94/410.66	309.61	417.09	0.42869	30.282	1989.5	2.4095	0.99201	0.0079862	0.015972	0.4122	TRUE
hsLibDrugV1Nik_17499	AAK1	637.87/693.21/936.63	873.49/732.07/856.71	693.21	856.71	0.30512	31159	4606.9	2.4089	0.992	0.008	0.016	0.41235	TRUE
hsLibDrugV1Nik_17981	GRM3	304.44/287.36/287.98	316.41/392.37/391.44	287.98	391.44	0.44151	135.66	1844.9	2.4087	0.992	0.0080043	0.016009	0.41235	TRUE
hsLibDrugV1Nik_05241	CALCR	860.5/624.08/691.14	854.32/868.59/750.51	691.14	854.32	0.30539	16589	4592.6	2.4078	0.99197	0.008025	0.01605	0.41264	TRUE
hsLibDrugV1Nik_14757	KCNH8	496/446.34/554.24	670.22/633.17/607.89	496	633.17	0.35161	2928.8	3250.5	2.4058	0.99193	0.0080677	0.016135	0.4134	TRUE
hsLibDrugV1Nik_20537	NQO1	164.64/197.5/101.97	206.15/241.87/251.86	164.64	241.87	0.55211	2503.5	1030.6	2.4056	0.99193	0.0080721	0.016144	0.4134	TRUE
hsLibDrugV1Nik_15369	CST3	0/6.9123/21.716	22.053/0/30.344	6.9123	22.053	1.5428	133.47	38.008	2.4559	0.99191	0.0080872	0.016174	0.41347	TRUE
hsLibDrugV1Nik_24667	OR4K5	289.94/319.94/279.48	409.42/265.52/393.46	289.94	393.46	0.43916	504.79	1858	2.4016	0.99184	0.0081619	0.016324	0.41435	TRUE
hsLibDrugV1Nik_02608	SLC24A1	309.61/264.64/311.58	487.08/379.47/416.72	309.61	416.72	0.42743	1013.1	1989.5	2.4013	0.99183	0.0081677	0.016335	0.41435	TRUE
hsLibDrugV1Nik_04807	HPD	655.47/639.88/873.37	598.31/813.77/847.61	655.47	813.77	0.31166	23862	4345.9	2.4012	0.99183	0.0081706	0.016341	0.41435	TRUE
hsLibDrugV1Nik_11008	FKBP7	735.2/613.22/768.57	903.22/956.74/827.38	735.2	903.22	0.29656	7996.2	4898.1	2.4006	0.99182	0.0081831	0.016366	0.41451	TRUE
hsLibDrugV1Nik_09726	ALDH4A1	329.29/333.77/381.45	473.66/324.65/445.04	333.77	445.04	0.41403	1146.9	2151.5	2.3991	0.99178	0.0082184	0.016437	0.4151	TRUE
hsLibDrugV1Nik_21397	LAMC1	5.1775/2.9624/4.7209	54.653/17.2/11.126	4.7209	17.2	1.6696	1.6504	25.563	2.4681	0.99177	0.0082336	0.016467	0.41514	TRUE
hsLibDrugV1Nik_10802	ELN	778.69/793.93/877.15	732.54/968.57/1002.4	793.93	968.57	0.28651	3578.6	5306.4	2.3973	0.99174	0.0082571	0.016514	0.41594	TRUE
hsLibDrugV1Nik_14376	SCUBE3	733.13/810.72/734.58	1005.8/892.24/902.23	734.58	902.23	0.29622	2899.8	4893.7	2.3966	0.99173	0.0082748	0.01655	0.4161	TRUE
hsLibDrugV1Nik_26953	NonTargetingGuide647	122.19/125.41/131.24	192.72/95.674/192.18	125.41	192.18	0.61183	22.194	776.22	2.3965	0.99172	0.0082756	0.016551	0.4161	TRUE
hsLibDrugV1Nik_23255	OGN	420.41/333.77/304.03	444.9/436.45/455.16	333.77	444.9	0.41355	4195.9	2151.5	2.3959	0.99171	0.0082907	0.016581	0.4162	TRUE
hsLibDrugV1Nik_15006	NAT2	569.52/643.83/603.33	754.6/791.19/557.32	603.33	754.6	0.32227	1391.7	3986.4	2.3958	0.99171	0.0082929	0.016586	0.4162	TRUE
hsLibDrugV1Nik_10353	STK33	450.44/486.83/463.59	595.43/595.54/564.4	463.59	595.43	0.36039	356.34	3029.6	2.3952	0.9917	0.0083048	0.01661	0.41642	TRUE
hsLibDrugV1Nik_03118	GPR1	189.5/366.35/320.08	428.6/466.55/342.89	320.08	428.6	0.42005	9596.6	2059.6	2.3911	0.9916	0.0083982	0.016796	0.41844	TRUE
hsLibDrugV1Nik_09324	PRKAB1	415.23/256.74/278.53	372.98/379.47/387.39	278.53	379.47	0.44476	9580.9	1782	2.3911	0.9916	0.0083989	0.016798	0.41844	TRUE
hsLibDrugV1Nik_07608	OLFM4	327.22/316.98/406	445.85/262.3/436.95	327.22	436.95	0.41613	3155.7	2107.5	2.3904	0.99158	0.0084159	0.016832	0.4186	TRUE
hsLibDrugV1Nik_20345	CCL13	558.13/674.45/538.19	634.74/779.37/702.97	558.13	702.97	0.33232	6963.3	3675.8	2.3889	0.99155	0.0084491	0.016898	0.41879	TRUE
hsLibDrugV1Nik_25361	IHH	973.37/1013.2/1157.6	1279.1/1057.8/1210.7	1013.2	1210.7	0.25679	11220	6841.2	2.3887	0.99155	0.0084537	0.016907	0.41879	TRUE
hsLibDrugV1Nik_14253	CHEK2	165.68/235.02/215.27	245.46/336.47/303.44	215.27	303.44	0.4933	1424.7	1362.6	2.3885	0.99154	0.0084597	0.016919	0.41879	TRUE
hsLibDrugV1Nik_05068	RAET1G	594.38/548.05/510.8	691.31/794.42/588.67	548.05	691.31	0.33449	1766.7	3606.6	2.3856	0.99147	0.0085261	0.017052	0.4217	TRUE
hsLibDrugV1Nik_25530	SERPINB5	282.69/286.37/296.47	448.73/306.37/388.4	286.37	388.4	0.43836	57.825	1834.2	2.3825	0.9914	0.0085988	0.017198	0.42317	TRUE
hsLibDrugV1Nik_13294	SIRPG	226.77/303.16/187.89	228.2/317.12/424.82	226.77	317.12	0.48198	3672.9	1438.5	2.3821	0.99139	0.0086066	0.017213	0.42317	TRUE
hsLibDrugV1Nik_02735	CPT1B	248.52/267.61/255.87	382.57/283.8/351.99	255.87	351.99	0.45857	95.863	1631.2	2.3798	0.99134	0.0086613	0.017323	0.4242	TRUE
hsLibDrugV1Nik_04798	RSPO4	253.7/262.67/322.91	366.27/261.22/360.08	262.67	360.08	0.4536	1854.8	1676.4	2.3792	0.99133	0.0086749	0.01735	0.4242	TRUE
hsLibDrugV1Nik_08754	PRKD1	100.44/115.53/145.4	212.86/155.87/179.03	115.53	179.03	0.62747	559.98	712.68	2.3784	0.99131	0.0086933	0.017387	0.4242	TRUE
hsLibDrugV1Nik_11023	KCNJ6	387.28/413.75/447.54	490.92/607.37/537.09	413.75	537.09	0.37559	921.41	2691	2.3775	0.99129	0.0087141	0.017428	0.4242	TRUE
hsLibDrugV1Nik_05129	CELSR3	247.48/199.47/187.89	283.81/289.17/202.29	199.47	283.81	0.50663	1219.7	1258.6	2.3774	0.99128	0.0087166	0.017433	0.4242	TRUE
hsLibDrugV1Nik_24410	CPB1	445.26/543.11/376.73	573.38/561.14/624.07	445.26	573.38	0.3641	7135.6	2904.9	2.377	0.99127	0.0087263	0.017453	0.4242	TRUE
hsLibDrugV1Nik_19382	FN1	1041.7/917.36/1107.5	1286.7/1044.9/1241.1	1041.7	1241.1	0.25241	9897	7042.3	2.3756	0.99124	0.0087599	0.01752	0.4242	TRUE
hsLibDrugV1Nik_17174	PTH2	481.51/483.86/782.73	617.49/548.24/744.44	483.86	617.49	0.35116	44663	3167.7	2.3741	0.99121	0.0087948	0.01759	0.4242	TRUE
hsLibDrugV1Nik_17266	OMD	713.46/464.11/512.69	504.34/746.04/650.37	512.69	650.37	0.34258	21333	3364.5	2.3736	0.99119	0.0088075	0.017615	0.4242	TRUE
hsLibDrugV1Nik_26891	NonTargetingGuide585	298.22/248.84/336.13	421.88/402.05/364.13	298.22	402.05	0.42972	1937.6	1913.4	2.3735	0.99119	0.0088098	0.01762	0.4242	TRUE
hsLibDrugV1Nik_01625	NPBWR2	614.05/779.12/720.41	998.14/884.72/660.49	720.41	884.72	0.29602	7379.6	4795.5	2.3726	0.99117	0.0088308	0.017662	0.4242	TRUE
hsLibDrugV1Nik_09326	ABCA7	199.85/192.56/152.96	147.66/275.2/326.7	192.56	275.2	0.51293	810.67	1213.2	2.3726	0.99117	0.0088317	0.017663	0.4242	TRUE
hsLibDrugV1Nik_23530	ST6GAL1	530.18/527.31/578.79	670.22/642.84/670.6	530.18	670.22	0.3376	1185.6	3484.1	2.3726	0.99117	0.0088321	0.017664	0.4242	TRUE
hsLibDrugV1Nik_26563	NonTargetingGuide257	222.63/417.7/258.71	204.23/441.82/355.02	258.71	355.02	0.45509	13290	1650	2.3712	0.99113	0.0088664	0.017733	0.4242	TRUE
hsLibDrugV1Nik_14836	CDH13	581.95/501.64/459.82	637.62/667.57/546.19	501.64	637.62	0.34544	4099.5	3289	2.3711	0.99113	0.0088672	0.017734	0.4242	TRUE
hsLibDrugV1Nik_05760	KCNC2	293.05/225.14/242.66	392.16/290.25/335.81	242.66	335.81	0.46708	1422.9	1543.6	2.371	0.99113	0.0088706	0.017741	0.4242	TRUE
hsLibDrugV1Nik_05952	STYK1	188.46/184.66/375.79	240.67/322.5/270.06	188.46	270.06	0.51672	17553	1186.3	2.3692	0.99109	0.0089142	0.017828	0.4242	TRUE
hsLibDrugV1Nik_24194	TPSD1	1003.4/1035.9/1361.5	1231.1/1234.1/1243.1	1035.9	1234.1	0.25239	53552	7001.1	2.3691	0.99108	0.0089166	0.017833	0.4242	TRUE
hsLibDrugV1Nik_01677	NCOR2	151.18/206.38/157.68	232.04/347.22/86.986	157.68	232.04	0.55445	1207.1	985.24	2.3689	0.99108	0.0089196	0.017839	0.4242	TRUE
hsLibDrugV1Nik_00238	CLEC11A	109.76/123.43/141.63	188.89/133.3/194.2	123.43	188.89	0.60977	258.95	763.49	2.3688	0.99108	0.0089218	0.017844	0.4242	TRUE
hsLibDrugV1Nik_02303	CAMK1D	0/9.8748/0	6.7118/6.4499/0	0.94418	6.4499	1.9381	48.755	4.7947	2.5144	0.99106	0.0089401	0.01788	0.4242	TRUE
hsLibDrugV1Nik_04084	GHRL	0/6.9123/0	7.6706/6.4499/1.0115	0.94418	6.4499	1.9381	23.89	4.7947	2.5144	0.99106	0.0089401	0.01788	0.4242	TRUE
hsLibDrugV1Nik_01023	RPN1	0/0/4.7209	0/6.4499/8.0917	0.94418	6.4499	1.9381	11.144	4.7947	2.5144	0.99106	0.0089401	0.01788	0.4242	TRUE
hsLibDrugV1Nik_11131	CMKLR1	504.29/544.1/584.45	712.41/540.72/685.77	544.1	685.77	0.33332	1606.6	3579.5	2.368	0.99106	0.0089425	0.017885	0.4242	TRUE
hsLibDrugV1Nik_05653	PNOC	14.497/8.8873/2.8326	23.971/25.8/26.298	8.8873	25.8	1.4386	34.064	49.366	2.4071	0.99104	0.0089629	0.017926	0.42442	TRUE
hsLibDrugV1Nik_17599	FABP2	196.74/167.87/170.9	253.13/248.32/168.91	170.9	248.32	0.53647	338.62	1071.4	2.3654	0.99099	0.0090052	0.01801	0.42582	TRUE
hsLibDrugV1Nik_23845	PLBD1	535.35/489.79/562.73	620.36/691.22/675.66	535.35	675.66	0.33525	1412.9	3519.6	2.365	0.99099	0.009015	0.01803	0.42582	TRUE
hsLibDrugV1Nik_21457	NTS	314.79/220.21/216.22	257.92/308.52/312.54	220.21	308.52	0.48464	4481.1	1395.1	2.3644	0.99097	0.0090289	0.018058	0.42582	TRUE
hsLibDrugV1Nik_19284	LIPJ	1.0355/20.737/1.8884	28.765/9.6749/1.0115	1.8884	9.6749	1.8859	178	9.8571	2.4801	0.99096	0.0090427	0.018085	0.42598	TRUE
hsLibDrugV1Nik_17345	IL31	705.17/595.45/624.11	612.69/892.24/775.79	624.11	775.79	0.31343	3696.7	4129.5	2.3605	0.99087	0.0091252	0.01825	0.42815	TRUE
hsLibDrugV1Nik_08275	KSR1	903.99/947.98/868.65	1039.4/1087.9/1114.6	903.99	1087.9	0.26688	1591.9	6075	2.3594	0.99085	0.0091515	0.018303	0.42815	TRUE
hsLibDrugV1Nik_11866	ADORA1	195.71/246.87/266.26	340.38/215/370.2	246.87	340.38	0.46182	1496.7	1571.5	2.359	0.99084	0.0091624	0.018325	0.42816	TRUE
hsLibDrugV1Nik_18152	CD8A	287.87/263.66/302.14	360.52/389.15/390.43	287.87	389.15	0.4336	394.95	1844.2	2.3583	0.99082	0.0091783	0.018357	0.4283	TRUE
hsLibDrugV1Nik_16551	BPIFB1	273.37/315/294.59	396.95/446.12/290.29	294.59	396.95	0.42903	433.49	1889.1	2.3553	0.99075	0.0092539	0.018508	0.4295	TRUE
hsLibDrugV1Nik_19804	CCL21	260.95/267.61/161.46	237.79/361.2/357.05	260.95	357.05	0.45088	4971.3	1664.9	2.3552	0.99074	0.0092554	0.018511	0.4295	TRUE
hsLibDrugV1Nik_13067	KCNJ4	551.92/428.56/506.08	583.93/641.77/642.28	506.08	641.77	0.34208	4055.1	3319.4	2.3551	0.99074	0.0092593	0.018519	0.4295	TRUE
hsLibDrugV1Nik_22039	HCN2	939.2/710/700.58	967.46/871.82/718.14	710	871.82	0.29584	26311	4723.2	2.3546	0.99073	0.0092715	0.018543	0.42971	TRUE
hsLibDrugV1Nik_21679	MAPK9	781.8/644.82/689.25	848.56/900.84/618.01	689.25	848.56	0.29959	5269.6	4579.6	2.3541	0.99072	0.0092837	0.018567	0.42991	TRUE
hsLibDrugV1Nik_04027	LMNA	331.36/294.27/245.49	234.91/431.07/396.49	294.27	396.49	0.42891	1877.6	1886.9	2.3533	0.9907	0.0093026	0.018605	0.42997	TRUE
hsLibDrugV1Nik_03669	PROK1	508.43/480.9/528.74	644.33/671.87/526.97	508.43	644.33	0.34116	585.25	3335.4	2.3532	0.99069	0.0093069	0.018614	0.42997	TRUE
hsLibDrugV1Nik_09775	SLC22A12	761.09/800.84/1072.6	894.59/1040.6/973.03	800.84	973.03	0.28065	37714	5354.5	2.3531	0.99069	0.0093088	0.018618	0.42997	TRUE
hsLibDrugV1Nik_23526	FKBP10	69.378/135.28/85.921	114.1/139.75/142.62	85.921	139.75	0.69535	1355.2	523.57	2.3524	0.99067	0.0093261	0.018652	0.43012	TRUE
hsLibDrugV1Nik_08380	CYSLTR1	669.97/866.02/759.12	783.36/1139.5/926.5	759.12	926.5	0.28712	9687.4	5064.2	2.352	0.99066	0.0093357	0.018671	0.43012	TRUE
hsLibDrugV1Nik_00848	HLA-DRA	118.05/158/132.19	199.44/133.3/225.56	132.19	199.44	0.5897	433.04	819.94	2.3486	0.99058	0.009423	0.018846	0.43195	TRUE
hsLibDrugV1Nik_14328	GRN	350/497.69/353.13	485.17/375.17/465.27	353.13	465.27	0.39692	10454	2281.6	2.3479	0.99056	0.0094402	0.01888	0.43218	TRUE
hsLibDrugV1Nik_21815	IGHG4	477.36/355.49/364.46	478.46/390.22/487.53	364.46	478.46	0.3917	6414.4	2357.9	2.3477	0.99055	0.0094452	0.01889	0.43218	TRUE
hsLibDrugV1Nik_13245	GPX5	402.81/302.17/342.74	396.95/517.07/453.14	342.74	453.14	0.40181	2627.2	2211.7	2.3474	0.99055	0.0094517	0.018903	0.43218	TRUE
hsLibDrugV1Nik_20934	CDC42BPG	6.213/8.8873/5.6651	37.394/19.35/20.229	6.213	20.229	1.5574	3.726	34.016	2.4032	0.99051	0.0094861	0.018972	0.43339	TRUE
hsLibDrugV1Nik_11668	CALCRL	206.06/224.16/250.21	312.58/268.75/423.8	224.16	312.58	0.47789	503.03	1421.2	2.3455	0.9905	0.0095019	0.019004	0.43362	TRUE
hsLibDrugV1Nik_02404	LALBA	580.91/538.17/489.09	759.39/524.59/677.68	538.17	677.68	0.33198	2118.1	3538.9	2.3451	0.99049	0.0095107	0.019021	0.43362	TRUE
hsLibDrugV1Nik_21838	IGHG1	565.38/620.13/592.95	755.56/739.59/730.28	592.95	739.59	0.31834	749.5	3914.9	2.3437	0.99045	0.0095466	0.019093	0.43397	TRUE
hsLibDrugV1Nik_07843	CCR1	457.69/527.31/463.59	592.56/508.47/612.95	463.59	592.56	0.35341	2047.4	3029.6	2.343	0.99043	0.0095653	0.019131	0.43443	TRUE
hsLibDrugV1Nik_17367	NRP1	209.17/193.55/355.01	294.36/299.92/226.57	209.17	294.36	0.49091	10757	1322.4	2.3427	0.99043	0.0095736	0.019147	0.43443	TRUE
hsLibDrugV1Nik_09807	C1QTNF9	314.79/427.58/389.95	574.34/288.1/507.76	389.95	507.76	0.38	3532.2	2530	2.3422	0.99041	0.0095863	0.019173	0.43443	TRUE
hsLibDrugV1Nik_22978	MLN	636.83/525.34/557.07	706.66/605.22/698.92	557.07	698.92	0.32675	3684.5	3668.5	2.3421	0.99041	0.0095886	0.019177	0.43443	TRUE
hsLibDrugV1Nik_24413	CPB1	521.89/503.61/683.59	684.6/658.97/471.34	521.89	658.97	0.33589	13240	3427.4	2.3414	0.99039	0.0096052	0.01921	0.43482	TRUE
hsLibDrugV1Nik_14468	CA2	829.43/787.02/832.77	1003.9/1077.1/759.61	829.43	1003.9	0.2751	905.12	5553.9	2.341	0.99038	0.009617	0.019234	0.43499	TRUE
hsLibDrugV1Nik_05071	RAET1G	556.06/670.5/461.71	696.11/697.67/704.99	556.06	697.67	0.32677	10999	3661.6	2.3402	0.99036	0.0096376	0.019275	0.43556	TRUE
hsLibDrugV1Nik_04008	EXTL2	665.83/879.84/615.61	766.1/821.29/877.95	665.83	821.29	0.30234	24162	4417.5	2.3391	0.99033	0.0096652	0.01933	0.43595	TRUE
hsLibDrugV1Nik_17159	UGT2B28	257.84/252.79/276.65	276.14/352.6/416.72	257.84	352.6	0.45005	189.58	1644.3	2.3368	0.99028	0.0097244	0.019449	0.43767	TRUE
hsLibDrugV1Nik_20859	AMD1	0/1.975/1.8884	9.5883/9.6749/5.0573	1.8884	9.5883	1.8741	1.7867	9.8571	2.4525	0.99023	0.0097668	0.019534	0.43922	TRUE
hsLibDrugV1Nik_11767	MAPK10	496/622.11/706.25	590.64/771.84/788.94	622.11	771.84	0.31069	11491	4115.7	2.334	0.9902	0.0097991	0.019598	0.44003	TRUE
hsLibDrugV1Nik_03500	TARS	84.911/87.885/132.19	112.18/141.9/145.65	87.885	141.9	0.68497	985.69	536.04	2.3329	0.99017	0.0098267	0.019653	0.4404	TRUE
hsLibDrugV1Nik_00771	PLG	520.86/424.61/403.17	520.64/592.32/547.2	424.61	547.2	0.36516	4861.2	2764.7	2.3315	0.99014	0.0098647	0.019729	0.4404	TRUE
hsLibDrugV1Nik_17738	KITLG	454.58/453.25/462.65	614.61/538.57/581.59	454.58	581.59	0.35477	33.423	2968.2	2.3312	0.99013	0.0098706	0.019741	0.4404	TRUE
hsLibDrugV1Nik_01085	MCOLN2	232.99/229.09/319.13	236.83/342.92/322.66	232.99	322.66	0.46804	3718.3	1479.6	2.3312	0.99013	0.0098708	0.019742	0.4404	TRUE
hsLibDrugV1Nik_20086	APOA2	449.41/567.8/461.71	602.14/554.69/589.68	461.71	589.68	0.35229	5703.4	3016.7	2.3301	0.9901	0.0099011	0.019802	0.4404	TRUE
hsLibDrugV1Nik_12973	COL28A1	295.12/320.93/503.25	388.33/426.77/462.24	320.93	426.77	0.41009	16954	2065.3	2.3289	0.99007	0.0099312	0.019862	0.4404	TRUE
hsLibDrugV1Nik_17864	LIPM	2.071/0/5.6651	8.6295/11.825/10.115	2.071	10.115	1.8557	8.6033	10.85	2.4419	0.99007	0.0099347	0.019869	0.4404	TRUE
hsLibDrugV1Nik_06213	MLNR	267.16/238.97/325.74	297.24/363.35/368.17	267.16	363.35	0.44222	2113.4	1706.2	2.3286	0.99006	0.0099393	0.019879	0.4404	TRUE
hsLibDrugV1Nik_06152	ADAM33	212.28/144.17/139.74	218.61/213.92/146.66	144.17	213.92	0.56606	2329	897.51	2.3283	0.99005	0.0099488	0.019898	0.4404	TRUE
hsLibDrugV1Nik_24525	SSR1	1072.8/1298.5/1095.3	1151.6/1354.5/1295.7	1095.3	1295.7	0.24225	20913	7419.9	2.3269	0.99001	0.009986	0.019972	0.4404	TRUE
hsLibDrugV1Nik_00812	BRD3	1.0355/0/13.219	6.7118/0/11.126	1.0355	6.7118	1.9217	74.75	5.2777	2.4708	0.99	0.010001	0.020002	0.4404	TRUE
hsLibDrugV1Nik_00613	STK25	1.0355/0/3.7767	6.7118/19.35/2.0229	1.0355	6.7118	1.9217	4.2933	5.2777	2.4708	0.99	0.010001	0.020002	0.4404	TRUE
hsLibDrugV1Nik_04413	UTS2R	1.0355/0.98748/2.8326	6.7118/9.6749/0	1.0355	6.7118	1.9217	1.6159	5.2777	2.4708	0.99	0.010001	0.020002	0.4404	TRUE
hsLibDrugV1Nik_05824	EHMT1	355.18/420.66/375.79	294.36/547.17/490.56	375.79	490.56	0.38363	1219.4	2434.3	2.3263	0.99	0.010002	0.020004	0.4404	TRUE
hsLibDrugV1Nik_13670	GLI2	702.07/635.93/619.39	784.32/786.89/804.12	635.93	786.89	0.30685	2323.8	4211.1	2.3263	0.99	0.010002	0.020005	0.4404	TRUE
hsLibDrugV1Nik_04613	IL18RAP	486.68/504.6/481.53	670.22/554.69/618.01	486.68	618.01	0.34401	173.75	3186.9	2.3262	0.99	0.010003	0.020007	0.4404	TRUE
hsLibDrugV1Nik_20255	CST2	305.47/254.77/317.25	451.61/408.5/375.25	305.47	408.5	0.41809	1354.7	1961.8	2.326	0.98999	0.01001	0.020019	0.4404	TRUE
hsLibDrugV1Nik_11597	SULT1E1	1138/945.01/990.45	1180.3/1276/886.04	990.45	1180.3	0.25278	11920	6681.6	2.3228	0.9899	0.010095	0.02019	0.44256	TRUE
hsLibDrugV1Nik_06555	SRPK2	438.02/374.25/406.94	526.4/454.72/625.09	406.94	526.4	0.37052	1017.1	2644.9	2.3227	0.9899	0.010098	0.020196	0.44256	TRUE
hsLibDrugV1Nik_08227	AREG	254.73/173.8/174.67	350.93/251.55/239.72	174.67	251.55	0.52365	3205.1	1096.1	2.322	0.98988	0.010117	0.020235	0.44256	TRUE
hsLibDrugV1Nik_17968	CEACAM1	863.61/824.54/918.69	1040.3/1097.6/841.54	863.61	1040.3	0.26831	2280.2	5792.5	2.322	0.98988	0.010117	0.020233	0.44256	TRUE
hsLibDrugV1Nik_21142	MARK4	532.25/488.8/456.04	538.86/622.42/620.03	488.8	620.03	0.34247	1480.3	3201.4	2.3193	0.98981	0.010189	0.020378	0.44341	TRUE
hsLibDrugV1Nik_23096	LMCD1	713.46/857.13/786.51	966.5/954.59/866.83	786.51	954.59	0.2791	5161.8	5254.7	2.3188	0.9898	0.010204	0.020409	0.44341	TRUE
hsLibDrugV1Nik_12990	AZGP1	377.96/385.12/532.52	484.21/500.94/607.89	385.12	500.94	0.3785	10890	2497.3	2.3178	0.98977	0.010229	0.020458	0.44389	TRUE
hsLibDrugV1Nik_11522	SLC22A14	321/247.86/242.66	392.16/269.82/339.85	247.86	339.85	0.45383	2688.8	1578	2.3159	0.98972	0.010283	0.020566	0.44535	TRUE
hsLibDrugV1Nik_17589	BCL2L2	902.95/1065.5/782.73	1120.9/965.34/1083.3	902.95	1083.3	0.26242	20435	6067.7	2.315	0.98969	0.010307	0.020615	0.44535	TRUE
hsLibDrugV1Nik_15890	ENPP3	638.9/580.64/622.22	835.14/740.67/770.74	622.22	770.74	0.30837	1003.7	4116.5	2.3148	0.98969	0.010311	0.020622	0.44535	TRUE
hsLibDrugV1Nik_08941	NUP62	339.64/368.33/463.59	481.33/556.84/434.93	368.33	481.33	0.38512	4949.2	2384	2.3144	0.98968	0.010323	0.020647	0.44535	TRUE
hsLibDrugV1Nik_16087	TRPC6	417.31/479.91/387.12	537.9/523.52/602.83	417.31	537.9	0.36547	2415.6	2715.1	2.3144	0.98968	0.010323	0.020645	0.44535	TRUE
hsLibDrugV1Nik_14381	SCUBE3	1484.9/1445.7/1370	1341.4/1675.9/1733.7	1445.7	1675.9	0.21307	3631.6	9908.7	2.313	0.98964	0.010361	0.020722	0.44623	TRUE
hsLibDrugV1Nik_25222	IL17RB	750.74/855.15/724.19	972.25/877.19/914.37	750.74	914.37	0.28412	5803.9	5005.9	2.3127	0.98963	0.01037	0.02074	0.44623	TRUE
hsLibDrugV1Nik_08288	KCNQ5	575.74/655.68/690.2	821.72/710.57/808.16	655.68	808.16	0.30123	3791.4	4347.4	2.3125	0.98963	0.010374	0.020748	0.44623	TRUE
hsLibDrugV1Nik_23126	GPR55	615.09/656.67/681.7	809.25/981.46/684.76	656.67	809.25	0.301	1177.9	4354.2	2.3123	0.98962	0.010381	0.020762	0.44623	TRUE
hsLibDrugV1Nik_00950	CHIT1	430.77/460.16/424.88	553.24/517.07/583.62	430.77	553.24	0.36027	449.39	2806.4	2.3119	0.98961	0.010391	0.020781	0.44628	TRUE
hsLibDrugV1Nik_09478	CXCL13	1082.1/987.48/990.45	1179.4/1127.7/1319	990.45	1179.4	0.25161	4203.9	6681.6	2.3111	0.98959	0.010415	0.020829	0.44696	TRUE
hsLibDrugV1Nik_21606	SIRPB1	503.25/570.76/753.46	712.41/600.92/754.55	570.76	712.41	0.31932	18968	3762.4	2.3093	0.98954	0.010464	0.020928	0.44718	TRUE
hsLibDrugV1Nik_05522	IAPP	681.36/544.1/573.12	786.24/714.87/704.99	573.12	714.87	0.31834	6278.8	3778.6	2.3059	0.98944	0.010557	0.021114	0.44803	TRUE
hsLibDrugV1Nik_22957	C1S	622.33/646.8/744.02	797.74/698.74/811.2	646.8	797.74	0.30219	5025.1	4286	2.3057	0.98944	0.010564	0.021128	0.44803	TRUE
hsLibDrugV1Nik_05873	CACNA2D2	337.57/510.52/412.61	566.67/363.35/532.03	412.61	532.03	0.36595	7609	2683.3	2.3054	0.98943	0.010571	0.021143	0.44803	TRUE
hsLibDrugV1Nik_02082	KLRC2	938.16/796.89/842.21	1015.4/911.59/1135.9	842.21	1015.4	0.2695	5630	5643	2.3055	0.98943	0.010571	0.021141	0.44803	TRUE
hsLibDrugV1Nik_22248	ATP1B2	645.12/682.35/625.99	795.83/812.69/646.33	645.12	795.83	0.30247	875.86	4274.4	2.3052	0.98942	0.010578	0.021156	0.44803	TRUE
hsLibDrugV1Nik_17516	GGCX	1652.7/1564.2/1715.6	1898.5/1716.8/1934.9	1652.7	1898.5	0.19995	5895.5	11392	2.3032	0.98937	0.010634	0.021267	0.44961	TRUE
hsLibDrugV1Nik_23238	IGLV3-16	11.39/20.737/12.274	31.641/6.4499/32.367	12.274	31.641	1.2981	36.198	69.077	2.3302	0.98936	0.010641	0.021283	0.44961	TRUE
hsLibDrugV1Nik_17501	AAK1	404.88/350.55/407.89	350.93/610.59/522.93	404.88	522.93	0.36832	1480.2	2631	2.3015	0.98932	0.010683	0.021366	0.45045	TRUE
hsLibDrugV1Nik_07393	BPIFA1	943.34/683.33/703.42	816.92/912.67/860.76	703.42	860.76	0.29085	28983	4677.6	2.3005	0.98929	0.010709	0.021419	0.45045	TRUE
hsLibDrugV1Nik_17895	INS	15.532/4.9374/2.8326	6.7118/17.2/20.229	4.9374	17.2	1.616	58.343	26.783	2.3694	0.98927	0.010733	0.021465	0.45045	TRUE
hsLibDrugV1Nik_05291	TRPM2	653.4/552/622.22	698.99/772.92/769.73	622.22	769.73	0.30648	2951.5	4116.5	2.2991	0.98925	0.01075	0.021501	0.45045	TRUE
hsLibDrugV1Nik_12034	MUC7	559.17/466.09/474.92	633.79/603.07/498.65	474.92	603.07	0.34398	3587.6	3106.7	2.299	0.98925	0.010751	0.021503	0.45045	TRUE
hsLibDrugV1Nik_02078	OTOP1	243.34/281.43/236.99	372.03/277.35/333.78	243.34	333.78	0.45433	745.54	1548.1	2.2986	0.98924	0.010763	0.021526	0.45045	TRUE
hsLibDrugV1Nik_11679	EGFR	1.0355/2.9624/11.33	12.465/10.75/13.149	2.9624	12.465	1.7647	36.866	15.744	2.3948	0.98923	0.010765	0.02153	0.45045	TRUE
hsLibDrugV1Nik_17715	IFNA5	19.674/21.724/42.488	60.406/26.875/47.539	21.724	47.539	1.0949	217.67	125.13	2.3077	0.98921	0.010789	0.021577	0.45045	TRUE
hsLibDrugV1Nik_04103	LIFR	480.47/481.89/673.2	569.54/649.29/610.93	481.89	610.93	0.34167	18302	3154.2	2.2976	0.98921	0.010793	0.021586	0.45045	TRUE
hsLibDrugV1Nik_14887	SSTR4	134.61/124.42/159.57	132.32/201.02/202.29	134.61	201.02	0.575	363.26	835.64	2.2973	0.9892	0.010802	0.021603	0.45045	TRUE
hsLibDrugV1Nik_22356	SLC22A6	460.8/655.68/399.39	586.8/589.09/517.87	460.8	586.8	0.34807	20876	3010.5	2.2965	0.98918	0.010823	0.021646	0.45053	TRUE
hsLibDrugV1Nik_21449	SEMA7A	484.61/556.94/444.71	723.92/517.07/613.96	484.61	613.96	0.34068	3411.4	3172.8	2.2963	0.98917	0.010828	0.021657	0.45053	TRUE
hsLibDrugV1Nik_24359	PSMA2	753.84/756.41/840.32	919.52/945.99/901.22	756.41	919.52	0.28138	3524.4	5045.3	2.2963	0.98917	0.010829	0.021657	0.45053	TRUE
hsLibDrugV1Nik_10773	MAP3K9	505.32/431.53/344.63	553.24/595.54/443.02	431.53	553.24	0.35773	6498.7	2811.6	2.2955	0.98915	0.010853	0.021705	0.45084	TRUE
hsLibDrugV1Nik_00160	CDH1	608.87/696.17/663.76	815.96/721.32/952.8	663.76	815.96	0.29743	2031.5	4403.2	2.2937	0.9891	0.010905	0.021809	0.45096	TRUE
hsLibDrugV1Nik_17384	EDDM3A	465.97/366.35/526.85	592.56/479.45/599.8	465.97	592.56	0.34604	6815.4	3045.8	2.2936	0.98909	0.010906	0.021812	0.45096	TRUE
hsLibDrugV1Nik_25687	EPO	6.213/8.8873/27.381	28.765/21.5/25.287	8.8873	25.287	1.4107	174.59	49.366	2.3341	0.98908	0.01092	0.021841	0.45096	TRUE
hsLibDrugV1Nik_01045	CAPZA2	235.06/263.66/230.38	342.3/258/323.67	235.06	323.67	0.45983	419.86	1493.3	2.2931	0.98908	0.010922	0.021843	0.45096	TRUE
hsLibDrugV1Nik_06154	MAP2K1	227.81/235.02/223.77	324.08/314.97/234.66	227.81	314.97	0.46565	34.141	1445.3	2.2927	0.98907	0.010933	0.021866	0.45109	TRUE
hsLibDrugV1Nik_17773	RANBP2	268.19/386.1/303.08	290.52/404.2/427.85	303.08	404.2	0.41415	4054.8	1945.9	2.2922	0.98905	0.010947	0.021895	0.45134	TRUE
hsLibDrugV1Nik_27024	NonTargetingGuide718	214.35/189.6/133.13	364.35/268.75/165.88	189.6	268.75	0.5011	1900.5	1193.7	2.2909	0.98902	0.010985	0.02197	0.45169	TRUE
hsLibDrugV1Nik_25090	APOH	220.56/121.46/141.63	212.86/209.62/199.26	141.63	209.62	0.56241	3318.6	881.02	2.2908	0.98901	0.010988	0.021976	0.45169	TRUE
hsLibDrugV1Nik_25434	ITGA2B	301.33/295.26/330.46	407.5/402.05/383.35	301.33	402.05	0.41482	442.86	1934.1	2.2901	0.98899	0.011008	0.022015	0.45212	TRUE
hsLibDrugV1Nik_15992	CD80	3.1065/0.98748/0	24.93/6.4499/0	0.98748	6.4499	1.9063	2.7327	5.0234	2.4372	0.98896	0.011043	0.022085	0.45263	TRUE
hsLibDrugV1Nik_24462	FUCA1	397.63/388.08/487.2	513.93/541.79/423.8	397.63	513.93	0.36933	4056.8	2581.9	2.2888	0.98895	0.011045	0.02209	0.45263	TRUE
hsLibDrugV1Nik_09081	TGM6	341.71/333.77/378.62	384.49/597.69/449.09	341.71	449.09	0.39321	712.52	2204.9	2.2867	0.98889	0.011105	0.02221	0.45441	TRUE
hsLibDrugV1Nik_17887	KLHL15	673.07/578.66/605.22	749.8/720.24/821.31	605.22	749.8	0.30859	2654.7	3999.4	2.2862	0.98888	0.011121	0.022243	0.45473	TRUE
hsLibDrugV1Nik_22730	CFHR5	152.22/157.01/177.51	136.15/231.12/228.59	157.01	228.59	0.53906	221.56	980.88	2.2856	0.98886	0.011139	0.022278	0.45511	TRUE
hsLibDrugV1Nik_16539	CYP26C1	189.5/297.23/238.88	327.92/385.92/307.49	238.88	327.92	0.45543	2921.8	1518.5	2.2849	0.98884	0.011158	0.022317	0.45514	TRUE
hsLibDrugV1Nik_04420	LYPD6	494.97/477.94/589.17	688.44/404.2/625.09	494.97	625.09	0.33611	4582.1	3243.4	2.2847	0.98884	0.011165	0.022329	0.45514	TRUE
hsLibDrugV1Nik_01105	HIST1H3I	303.4/251.81/284.2	381.61/405.27/326.7	284.2	381.61	0.42392	709.01	1819.7	2.2836	0.9888	0.011198	0.022396	0.45616	TRUE
hsLibDrugV1Nik_22042	HCN2	419.38/451.28/540.07	738.3/575.12/550.24	451.28	575.12	0.34916	4451.3	2945.8	2.2818	0.98875	0.011251	0.022503	0.45765	TRUE
hsLibDrugV1Nik_02335	NR5A1	426.63/295.26/202.06	337.51/394.52/414.7	295.26	394.52	0.41691	12972	1893.5	2.2812	0.98873	0.011268	0.022537	0.458	TRUE
hsLibDrugV1Nik_12105	FPR3	354.14/331.79/406.94	425.72/510.62/463.25	354.14	463.25	0.38652	1643.8	2288.4	2.2809	0.98872	0.011278	0.022557	0.45806	TRUE
hsLibDrugV1Nik_11398	NID2	526.03/505.59/710.97	584.88/660.04/744.44	526.03	660.04	0.32685	17310	3455.8	2.2796	0.98869	0.011315	0.02263	0.45866	TRUE
hsLibDrugV1Nik_22205	EREG	791.12/772.21/838.44	1147.7/730.99/956.85	791.12	956.85	0.27407	1298.2	5286.8	2.2793	0.98867	0.011326	0.022652	0.45866	TRUE
hsLibDrugV1Nik_10008	IL11	211.24/231.07/198.28	315.45/294.55/181.05	211.24	294.55	0.47768	280.59	1336	2.2791	0.98867	0.01133	0.02266	0.45866	TRUE
hsLibDrugV1Nik_24624	C4BPA	326.18/367.34/483.42	478.46/496.64/466.29	367.34	478.46	0.38035	7584.5	2377.4	2.2789	0.98866	0.011337	0.022674	0.45866	TRUE
hsLibDrugV1Nik_26008	PRSS53	527.07/529.29/436.21	701.86/661.12/577.55	527.07	661.12	0.32636	4129.8	3462.9	2.278	0.98864	0.011364	0.022729	0.45866	TRUE
hsLibDrugV1Nik_19517	PLA2G5	223.67/230.08/287.98	204.23/317.12/337.83	230.08	317.12	0.46118	1696.5	1460.3	2.2777	0.98863	0.011373	0.022746	0.45866	TRUE
hsLibDrugV1Nik_03835	CEACAM8	590.23/602.36/761.01	531.19/746.04/815.24	602.36	746.04	0.30817	12659	3979.7	2.2776	0.98862	0.011375	0.02275	0.45866	TRUE
hsLibDrugV1Nik_09092	FAS	655.47/487.81/505.14	514.89/675.09/636.21	505.14	636.21	0.33224	11450	3312.9	2.2772	0.98861	0.011386	0.022772	0.45866	TRUE
hsLibDrugV1Nik_22078	IGHV1-46	1076.9/1121.8/1326.6	1320.3/1391/1195.6	1121.8	1320.3	0.2349	21979	7607.2	2.2763	0.98858	0.011415	0.02283	0.45887	TRUE
hsLibDrugV1Nik_13310	GSTO1	963.01/872.93/859.21	1047/1058.9/1001.4	872.93	1047	0.26211	4151.8	5857.6	2.2749	0.98854	0.011455	0.022911	0.45887	TRUE
hsLibDrugV1Nik_24214	KLHL12	546.74/598.41/637.32	757.47/723.47/741.4	598.41	741.4	0.30866	2091.9	3952.5	2.2745	0.98853	0.011469	0.022937	0.45887	TRUE
hsLibDrugV1Nik_07171	PDE6D	511.54/602.36/439.05	733.5/613.82/643.29	511.54	643.29	0.33006	6751.9	3356.6	2.2742	0.98852	0.011478	0.022957	0.45887	TRUE
hsLibDrugV1Nik_15601	PRKAA1	413.16/574.71/381.45	539.82/493.42/531.02	413.16	531.02	0.36128	13552	2687.1	2.2736	0.9885	0.011495	0.022991	0.45887	TRUE
hsLibDrugV1Nik_12456	KCNC4	339.64/404.87/336.13	511.06/289.17/446.06	339.64	446.06	0.39219	2133.1	2190.9	2.2734	0.9885	0.0115	0.023001	0.45887	TRUE
hsLibDrugV1Nik_22786	MVD	530.18/509.54/600.5	607.9/664.34/775.79	530.18	664.34	0.32491	2685.8	3484.1	2.273	0.98849	0.011513	0.023026	0.45903	TRUE
hsLibDrugV1Nik_21387	TNFRSF10C	4.142/6.9123/18.884	3.8353/22.575/21.241	6.9123	21.241	1.491	75.494	38.008	2.3241	0.98842	0.011577	0.023154	0.46091	TRUE
hsLibDrugV1Nik_27194	NonTargetingGuide888	305.47/356.48/390.89	559/465.47/462.24	356.48	465.47	0.38393	1893	2304.2	2.2706	0.98841	0.011587	0.023173	0.46096	TRUE
hsLibDrugV1Nik_22047	STK40	415.23/409.8/441.88	489.96/533.19/570.47	415.23	533.19	0.35997	369.7	2701.1	2.2697	0.98839	0.011614	0.023227	0.46136	TRUE
hsLibDrugV1Nik_08597	BPI	715.53/730.73/1445.5	897.46/889.02/791.98	730.73	889.02	0.28252	255600	4867	2.2688	0.98836	0.011639	0.023278	0.4617	TRUE
hsLibDrugV1Nik_17418	FCGR3B	889.49/688.27/755.35	892.67/1051.3/916.39	755.35	916.39	0.27848	11247	5038	2.2689	0.98836	0.011639	0.023277	0.4617	TRUE
hsLibDrugV1Nik_27018	NonTargetingGuide712	510.5/331.79/378.62	490.92/496.64/381.32	378.62	490.92	0.37387	9792.9	2453.4	2.2673	0.98831	0.011687	0.023375	0.46259	TRUE
hsLibDrugV1Nik_15831	IBSP	397.63/401.9/396.56	423.8/537.49/512.81	397.63	512.81	0.36619	9.6985	2581.9	2.2668	0.9883	0.011701	0.023402	0.46259	TRUE
hsLibDrugV1Nik_08004	HSP90B1	98.372/155.03/104.8	170.67/162.32/118.34	104.8	162.32	0.62633	1282.2	643.9	2.2667	0.9883	0.011703	0.023406	0.46259	TRUE
hsLibDrugV1Nik_00066	EIF4A1	509.47/533.24/467.37	640.5/703.04/475.39	509.47	640.5	0.32963	1168.5	3342.5	2.2664	0.98829	0.011712	0.023425	0.46259	TRUE
hsLibDrugV1Nik_08986	ERBIN	798.37/850.22/724.19	852.4/1000.8/963.93	798.37	963.93	0.27156	4095.4	5337.3	2.2662	0.98828	0.011721	0.023442	0.4626	TRUE
hsLibDrugV1Nik_19771	ADGRE2	634.76/760.36/712.86	898.42/747.12/868.85	712.86	868.85	0.28513	4177.7	4743.1	2.265	0.98824	0.011757	0.023513	0.46286	TRUE
hsLibDrugV1Nik_08404	VIP	415.23/445.35/490.98	646.25/399.9/567.43	445.35	567.43	0.34881	1494.3	2905.5	2.2648	0.98824	0.011761	0.023522	0.46286	TRUE
hsLibDrugV1Nik_21317	PTGES	93.195/111.58/206.78	82.459/192.42/170.94	111.58	170.94	0.61087	4699.8	687.33	2.2639	0.98821	0.01179	0.023579	0.46286	TRUE
hsLibDrugV1Nik_18520	BLM	520.86/557.92/592.95	695.15/534.27/701.96	557.92	695.15	0.31675	1300.4	3674.3	2.2639	0.98821	0.011791	0.023583	0.46286	TRUE
hsLibDrugV1Nik_23990	RECQL	520.86/466.09/501.36	411.34/730.99/631.15	501.36	631.15	0.33155	812.11	3287.1	2.2638	0.98821	0.011792	0.023585	0.46286	TRUE
hsLibDrugV1Nik_04840	PDE8B	110.8/86.898/128.41	174.51/125.77/169.93	110.8	169.93	0.61248	440.69	682.28	2.2637	0.9882	0.011798	0.023596	0.46286	TRUE
hsLibDrugV1Nik_11894	CD38	500.15/669.51/518.36	662.55/595.54/650.37	518.36	650.37	0.32676	11589	3403.3	2.263	0.98818	0.011819	0.023639	0.46286	TRUE
hsLibDrugV1Nik_09224	CDC42BPB	8.284/10.862/13.219	28.765/10.75/33.378	10.862	28.765	1.3272	6.0999	60.828	2.2954	0.98818	0.011822	0.023644	0.46286	TRUE
hsLibDrugV1Nik_16124	PPIL2	1044.8/1000.3/1100	1235/1276/1110.6	1044.8	1235	0.24101	2511.5	7064.2	2.2624	0.98816	0.011836	0.023672	0.46286	TRUE
hsLibDrugV1Nik_06598	BLK	144.97/175.77/151.07	96.842/236.5/220.5	151.07	220.5	0.54257	323.68	942.27	2.2618	0.98815	0.011854	0.023708	0.46286	TRUE
hsLibDrugV1Nik_01616	DPP7	135.65/132.32/152.01	217.65/175.22/201.28	135.65	201.28	0.56588	139.42	842.33	2.2614	0.98813	0.011869	0.023737	0.46286	TRUE
hsLibDrugV1Nik_12375	PLA2G4A	216.42/180.71/243.6	300.11/310.67/233.65	216.42	300.11	0.46983	1007	1370.1	2.2611	0.98812	0.011878	0.023756	0.46286	TRUE
hsLibDrugV1Nik_19149	TLN1	438.02/566.81/473.04	558.04/634.24/598.79	473.04	598.79	0.33945	5010.1	3093.9	2.2608	0.98811	0.011886	0.023772	0.46286	TRUE
hsLibDrugV1Nik_26438	NonTargetingGuide132	172.93/272.54/150.13	247.38/284.87/208.36	172.93	247.38	0.51404	5221.6	1084.7	2.2605	0.98811	0.011894	0.023787	0.46286	TRUE
hsLibDrugV1Nik_25558	PSMA3	345.86/285.38/313.47	445.85/414.95/365.14	313.47	414.95	0.40348	918.95	2015.4	2.2604	0.9881	0.011898	0.023795	0.46286	TRUE
hsLibDrugV1Nik_05770	YARS	724.85/529.29/507.97	662.55/769.69/657.45	529.29	662.55	0.32343	19349	3478.1	2.2596	0.98808	0.011922	0.023843	0.46286	TRUE
hsLibDrugV1Nik_02032	HS3ST1	615.09/622.11/683.59	767.06/638.54/850.64	622.11	767.06	0.30174	1914.6	4115.7	2.2594	0.98807	0.011928	0.023856	0.46286	TRUE
hsLibDrugV1Nik_10841	RORB	640.97/692.22/636.38	788.16/825.59/584.63	640.97	788.16	0.2978	1323.7	4245.8	2.2588	0.98805	0.011948	0.023896	0.46286	TRUE
hsLibDrugV1Nik_11038	PDE2A	154.29/173.8/298.36	248.34/241.87/324.68	173.8	248.34	0.51242	7948.7	1090.3	2.2574	0.98801	0.011991	0.023981	0.4635	TRUE
hsLibDrugV1Nik_18644	CCNT1	261.98/270.57/353.13	364.35/473/315.58	270.57	364.35	0.42798	3444.7	1728.9	2.2555	0.98795	0.01205	0.024099	0.46452	TRUE
hsLibDrugV1Nik_01839	NOS2	361.39/337.72/292.7	442.98/321.42/505.73	337.72	442.98	0.39041	1293.6	2178	2.2555	0.98795	0.012051	0.024102	0.46452	TRUE
hsLibDrugV1Nik_08225	AREG	471.15/342.65/342.74	448.73/457.95/302.43	342.74	448.73	0.38775	8244.9	2211.7	2.2538	0.98789	0.012106	0.024211	0.46564	TRUE
hsLibDrugV1Nik_14828	FGG	395.56/463.13/434.32	554.2/555.77/465.27	434.32	554.2	0.35092	1166.1	2830.6	2.2532	0.98788	0.012123	0.024246	0.46598	TRUE
hsLibDrugV1Nik_11673	IGLC7	301.33/154.05/171.84	273.27/188.12/245.79	171.84	245.79	0.51381	8542	1077.6	2.2526	0.98786	0.012142	0.024284	0.46638	TRUE
hsLibDrugV1Nik_06985	RXFP3	621.3/500.65/649.6	686.52/800.87/765.68	621.3	765.68	0.30102	7678.5	4110.1	2.2521	0.98784	0.012159	0.024318	0.46671	TRUE
hsLibDrugV1Nik_21170	GAS6	212.28/284.39/231.33	286.69/318.2/317.6	231.33	317.6	0.4556	1589.5	1468.6	2.2513	0.98782	0.012182	0.024365	0.46727	TRUE
hsLibDrugV1Nik_22481	AURKA	404.88/414.74/377.67	380.65/520.29/573.5	404.88	520.29	0.36105	418.69	2631	2.2501	0.98778	0.012221	0.024442	0.46749	TRUE
hsLibDrugV1Nik_14374	CNP	421.45/348.58/388.06	428.6/500.94/572.49	388.06	500.94	0.36754	1336.7	2517.2	2.25	0.98777	0.012225	0.024451	0.46749	TRUE
hsLibDrugV1Nik_01533	OR2T3	434.91/425.6/468.32	568.58/554.69/465.27	434.91	554.69	0.35026	601.3	2834.5	2.2499	0.98777	0.012228	0.024456	0.46749	TRUE
hsLibDrugV1Nik_26356	NonTargetingGuide050	490.83/368.33/410.72	529.27/495.57/526.97	410.72	526.97	0.3588	4107	2670.5	2.2496	0.98776	0.012237	0.024473	0.46749	TRUE
hsLibDrugV1Nik_02510	CACNA1D	285.8/204.41/185.06	288.61/211.77/285.23	204.41	285.23	0.4787	3499.3	1291	2.2495	0.98776	0.012241	0.024482	0.46749	TRUE
hsLibDrugV1Nik_24375	EEF2K	551.92/615.2/508.92	687.48/628.87/726.23	551.92	687.48	0.31634	2926.7	3633.1	2.249	0.98774	0.012257	0.024513	0.46749	TRUE
hsLibDrugV1Nik_07029	COL4A6	651.33/521.39/601.45	743.09/849.24/675.66	601.45	743.09	0.30465	4448.8	3973.4	2.2471	0.98768	0.012317	0.024634	0.46918	TRUE
hsLibDrugV1Nik_06132	TNFRSF10A	316.86/373.27/435.27	501.47/483.75/478.42	373.27	483.75	0.37316	3512.9	2417.3	2.2471	0.98768	0.012318	0.024636	0.46918	TRUE
hsLibDrugV1Nik_02173	GSTO2	1092.5/999.33/1142.5	843.77/1285.7/1314.9	1092.5	1285.7	0.23477	5586.8	7400.1	2.2463	0.98766	0.012342	0.024684	0.46953	TRUE
hsLibDrugV1Nik_19401	BMP2	253.7/272.54/276.65	366.27/342.92/418.75	272.54	366.27	0.42508	186.01	1742.1	2.2456	0.98764	0.012363	0.024727	0.46953	TRUE
hsLibDrugV1Nik_20077	SERPINF2	324.11/410.79/322.91	426.68/403.12/452.13	324.11	426.68	0.39559	3757.3	2086.7	2.2453	0.98763	0.012373	0.024746	0.46953	TRUE
hsLibDrugV1Nik_16724	HSPD1	430.77/355.49/350.29	463.11/408.5/516.86	355.49	463.11	0.38061	2846.8	2297.5	2.2453	0.98763	0.012375	0.024749	0.46953	TRUE
hsLibDrugV1Nik_05421	PIP	527.07/574.71/572.18	734.46/663.27/710.05	572.18	710.05	0.31097	1020.5	3772.2	2.2448	0.98761	0.012389	0.024779	0.46953	TRUE
hsLibDrugV1Nik_04017	CMA1	753.84/628.03/609	882.12/746.04/772.76	628.03	772.76	0.29875	8095	4156.6	2.2448	0.98761	0.012391	0.024781	0.46953	TRUE
hsLibDrugV1Nik_21692	DRD1	603.7/692.22/600.5	574.34/770.77/745.45	603.7	745.45	0.30384	3923.4	3988.9	2.2445	0.9876	0.012401	0.024803	0.46953	TRUE
hsLibDrugV1Nik_06365	NUAK2	373.81/494.73/335.19	484.21/553.62/411.67	373.81	484.21	0.37243	8055.8	2421	2.2436	0.98757	0.01243	0.024859	0.46953	TRUE
hsLibDrugV1Nik_02369	HTR3B	263.02/364.38/273.81	431.47/367.65/344.91	273.81	367.65	0.42378	4159.3	1750.5	2.2427	0.98754	0.012458	0.024917	0.46953	TRUE
hsLibDrugV1Nik_03369	MUC5B	258.87/339.69/273.81	401.75/367.65/305.46	273.81	367.65	0.42378	2281.5	1750.5	2.2427	0.98754	0.012458	0.024917	0.46953	TRUE
hsLibDrugV1Nik_10195	VEGFA	755.91/826.52/898.86	993.35/858.92/1090.4	826.52	993.35	0.26496	5109.4	5533.5	2.2427	0.98754	0.012458	0.024917	0.46953	TRUE
hsLibDrugV1Nik_11357	FKBP1A	568.49/746.53/569.34	706.66/678.32/736.35	569.34	706.66	0.31122	15698	3752.7	2.2415	0.9875	0.012497	0.024994	0.46953	TRUE
hsLibDrugV1Nik_27213	NonTargetingGuide907	316.86/253.78/321.02	418.05/330.02/441	316.86	418.05	0.39872	1998.3	2038.1	2.2414	0.9875	0.012501	0.025003	0.46953	TRUE
hsLibDrugV1Nik_24997	GSK3B	577.81/473.99/490.03	550.37/663.27/616.99	490.03	616.99	0.33178	3981	3209.8	2.241	0.98749	0.012513	0.025027	0.46953	TRUE
hsLibDrugV1Nik_03606	SLC10A1	435.94/409.8/362.57	525.44/556.84/445.04	409.8	525.44	0.35782	1457.3	2664.3	2.2403	0.98746	0.012537	0.025074	0.46953	TRUE
hsLibDrugV1Nik_18905	NR1H2	244.38/313.03/189.78	332.71/377.32/210.38	244.38	332.71	0.44361	3847	1555	2.2401	0.98746	0.012541	0.025082	0.46953	TRUE
hsLibDrugV1Nik_08843	METRN	229.88/164.91/129.35	236.83/282.72/146.66	164.91	236.83	0.51955	2742.8	1032.3	2.2385	0.98741	0.012595	0.02519	0.47051	TRUE
hsLibDrugV1Nik_23205	MUC17	303.4/294.27/270.04	290.52/424.62/391.44	294.27	391.44	0.41044	335.28	1886.9	2.2369	0.98735	0.012646	0.025291	0.47155	TRUE
hsLibDrugV1Nik_08052	NEK11	687.57/561.87/562.73	781.44/650.37/698.92	562.73	698.92	0.31218	7792.5	3707.3	2.2367	0.98735	0.012652	0.025305	0.47155	TRUE
hsLibDrugV1Nik_04309	PDCD1	461.83/408.81/476.81	451.61/594.47/584.63	461.83	584.63	0.33949	1517.6	3017.6	2.2354	0.9873	0.012696	0.025392	0.47267	TRUE
hsLibDrugV1Nik_10068	CACNG2	271.3/243.91/343.68	364.35/312.82/531.02	271.3	364.35	0.4241	2994.8	1733.8	2.2348	0.98728	0.012716	0.025431	0.4729	TRUE
hsLibDrugV1Nik_19608	HIST1H4A	420.41/334.75/362.57	470.78/542.87/372.22	362.57	470.78	0.37591	2059.8	2345.2	2.2346	0.98728	0.01272	0.02544	0.4729	TRUE
hsLibDrugV1Nik_04827	TM2D1	383.13/368.33/436.21	432.43/494.49/511.8	383.13	494.49	0.36726	1518.3	2483.9	2.2344	0.98727	0.012728	0.025456	0.4729	TRUE
hsLibDrugV1Nik_10230	PODN	567.45/733.69/600.5	741.17/837.42/626.1	600.5	741.17	0.30319	9416.3	3966.9	2.2335	0.98724	0.012758	0.025517	0.4737	TRUE
hsLibDrugV1Nik_13806	EPOR	405.92/417.7/468.32	667.34/494.49/534.05	417.7	534.05	0.35376	1350.3	2717.8	2.2318	0.98719	0.012813	0.025625	0.47512	TRUE
hsLibDrugV1Nik_10064	CACNG2	196.74/208.36/201.11	276.14/280.57/304.45	201.11	280.57	0.47835	35.787	1269.4	2.2303	0.98714	0.012864	0.025728	0.47615	TRUE
hsLibDrugV1Nik_23515	IGFBP4	734.17/712.96/1004.6	935.82/890.09/786.92	734.17	890.09	0.2775	36795	4890.9	2.2295	0.98711	0.012889	0.025778	0.47644	TRUE
hsLibDrugV1Nik_24617	ERN2	13.461/0/9.4418	25.888/32.25/16.183	9.4418	25.888	1.3646	52.653	52.575	2.2682	0.9871	0.012902	0.025804	0.47644	TRUE
hsLibDrugV1Nik_00071	PLA2G2D	397.63/427.58/482.48	383.53/550.39/545.18	427.58	545.18	0.34982	1955.4	2784.8	2.2286	0.98708	0.012922	0.025843	0.47677	TRUE
hsLibDrugV1Nik_23886	TSPEAR	331.36/438.44/299.31	526.4/434.3/355.02	331.36	434.3	0.38925	6246.7	2135.3	2.2276	0.98705	0.012954	0.025907	0.47677	TRUE
hsLibDrugV1Nik_11962	TF	242.31/217.24/250.21	329.84/225.75/329.74	242.31	329.74	0.44291	345.27	1541.2	2.2271	0.98703	0.012972	0.025944	0.47677	TRUE
hsLibDrugV1Nik_24095	CD81	246.45/286.37/236.99	334.63/311.75/341.88	246.45	334.63	0.43975	841.51	1568.7	2.2264	0.98701	0.012992	0.025984	0.47677	TRUE
hsLibDrugV1Nik_07353	INSL6	392.45/354.5/387.12	498.59/558.99/248.82	387.12	498.59	0.36426	546.02	2510.8	2.2247	0.98695	0.013051	0.026102	0.47677	TRUE
hsLibDrugV1Nik_18377	C1RL	225.74/267.61/362.57	359.56/320.35/447.07	267.61	359.56	0.42475	5385.2	1709.2	2.2242	0.98693	0.013067	0.026134	0.47677	TRUE
hsLibDrugV1Nik_07252	DCLK2	516.71/533.24/473.98	646.25/484.82/650.37	516.71	646.25	0.32217	1049.6	3392	2.2241	0.98693	0.01307	0.026139	0.47677	TRUE
hsLibDrugV1Nik_11697	FGF5	245.41/286.37/292.7	502.43/381.62/370.2	286.37	381.62	0.41302	858.68	1834.2	2.2241	0.98693	0.013071	0.026141	0.47677	TRUE
hsLibDrugV1Nik_12024	KLK12	489.79/264.64/296.47	445.85/393.45/336.82	296.47	393.45	0.40706	19192	1901.7	2.2237	0.98692	0.013084	0.026168	0.47677	TRUE
hsLibDrugV1Nik_03153	CACNA1I	413.16/512.5/612.78	641.46/502.02/711.06	512.5	641.46	0.32323	9961.5	3363.2	2.2236	0.98691	0.013086	0.026173	0.47677	TRUE
hsLibDrugV1Nik_21250	ZP3	228.85/243.91/226.6	332.71/284.87/313.55	228.85	313.55	0.45265	115.93	1452.2	2.2229	0.98689	0.013111	0.026222	0.47677	TRUE
hsLibDrugV1Nik_13710	NEK9	319.97/416.71/307.8	379.7/492.34/420.77	319.97	420.77	0.39402	4753.9	2058.9	2.2215	0.98684	0.013159	0.026317	0.47768	TRUE
hsLibDrugV1Nik_25764	LILRA4	749.7/689.26/626.94	722.96/839.57/869.86	689.26	839.57	0.28423	3768.5	4579.6	2.2211	0.98683	0.013172	0.026343	0.47768	TRUE
hsLibDrugV1Nik_01307	CHRNA10	3.1065/6.9123/3.7767	16.3/0/14.161	3.7767	14.161	1.6662	5.1406	20.268	2.3065	0.98681	0.01319	0.02638	0.478	TRUE
hsLibDrugV1Nik_08254	CES3	434.91/362.4/335.19	469.83/494.49/404.59	362.4	469.83	0.37362	2998.9	2344.1	2.2187	0.98675	0.013252	0.026504	0.47961	TRUE
hsLibDrugV1Nik_07627	SLK	609.91/635.93/782.73	561.87/815.92/779.84	635.93	779.84	0.29388	11113	4211.1	2.2176	0.98671	0.013291	0.026582	0.48014	TRUE
hsLibDrugV1Nik_06418	DHRS3	30.029/36.537/29.27	59.447/20.425/66.757	30.029	59.447	0.96204	21.46	175.26	2.2221	0.98671	0.013293	0.026586	0.48014	TRUE
hsLibDrugV1Nik_06148	ADAM33	589.2/527.31/494.75	657.76/735.29/590.7	527.31	657.76	0.31835	2445	3464.5	2.2162	0.98666	0.01334	0.026681	0.48067	TRUE
hsLibDrugV1Nik_00913	STATH	575.74/534.22/518.36	665.43/758.94/606.88	534.22	665.43	0.3163	987.53	3511.9	2.214	0.98658	0.013415	0.026831	0.48226	TRUE
hsLibDrugV1Nik_07646	CHST11	489.79/506.58/644.88	563.79/682.62/634.19	506.58	634.19	0.32357	9704.7	3322.7	2.2139	0.98658	0.013419	0.026838	0.48226	TRUE
hsLibDrugV1Nik_15101	P4HTM	432.84/425.6/459.82	522.56/550.39/727.24	432.84	550.39	0.34593	390.13	2820.5	2.2135	0.98657	0.013431	0.026862	0.48226	TRUE
hsLibDrugV1Nik_04055	CDK8	475.29/425.6/451.32	571.46/507.39/576.54	451.32	571.46	0.33983	618.08	2946.1	2.2135	0.98657	0.013433	0.026866	0.48226	TRUE
hsLibDrugV1Nik_26510	NonTargetingGuide204	647.19/556.94/616.55	772.82/757.87/618.01	616.55	757.87	0.29729	2246.3	4077.4	2.2131	0.98655	0.013447	0.026893	0.48226	TRUE
hsLibDrugV1Nik_03814	SULT1A2	605.77/401.9/400.33	526.4/514.92/432.91	401.9	514.92	0.35672	20781	2610.8	2.2119	0.98651	0.013488	0.026977	0.48309	TRUE
hsLibDrugV1Nik_24885	HIST1H3D	171.89/169.85/209.61	244.5/295.62/219.49	171.89	244.5	0.50585	713.35	1077.9	2.2116	0.9865	0.013499	0.026997	0.48309	TRUE
hsLibDrugV1Nik_07341	PKD2	661.68/707.03/659.98	632.83/833.12/808.16	661.68	808.16	0.28811	1029.7	4388.9	2.211	0.98648	0.013517	0.027033	0.48309	TRUE
hsLibDrugV1Nik_17763	KLHL6	628.55/637.91/685.48	818.84/781.52/631.15	637.91	781.52	0.29251	1175.2	4224.7	2.2094	0.98643	0.013572	0.027145	0.48465	TRUE
hsLibDrugV1Nik_03308	EPYC	894.67/844.29/844.1	1085.4/875.04/1010.5	844.29	1010.5	0.25891	1269	5657.6	2.2091	0.98642	0.013583	0.027166	0.48465	TRUE
hsLibDrugV1Nik_14311	PI15	335.5/238.97/191.67	325.04/258/329.74	238.97	325.04	0.44221	5777.9	1519.1	2.2084	0.98639	0.01361	0.027219	0.48465	TRUE
hsLibDrugV1Nik_01622	NPBWR2	375.89/425.6/359.73	405.58/484.82/509.78	375.89	484.82	0.36629	1366.3	2435	2.2076	0.98636	0.013637	0.027274	0.48465	TRUE
hsLibDrugV1Nik_10144	KAT2B	1.0355/0/5.6651	7.6706/6.4499/0	1.0355	6.4499	1.8718	11.253	5.2777	2.3569	0.98633	0.013674	0.027348	0.48465	TRUE
hsLibDrugV1Nik_01776	SLC12A5	631.65/474.98/580.67	717.2/660.04/751.52	580.67	717.2	0.30418	6885.5	3830.5	2.206	0.98631	0.013694	0.027387	0.48465	TRUE
hsLibDrugV1Nik_15925	TTBK2	16.568/10.862/10.386	29.724/4.3/28.321	10.862	28.321	1.3056	16.391	60.828	2.2385	0.98628	0.013716	0.027432	0.48465	TRUE
hsLibDrugV1Nik_11050	SLC13A1	580.91/713.94/600.5	780.49/700.89/739.38	600.5	739.38	0.2997	6626.5	3966.9	2.205	0.98627	0.013726	0.027452	0.48465	TRUE
hsLibDrugV1Nik_15342	EPHA4	422.48/524.35/491.92	705.7/617.04/538.1	491.92	617.04	0.32635	2936.6	3222.6	2.2041	0.98624	0.013758	0.027517	0.48465	TRUE
hsLibDrugV1Nik_03120	GPR1	541.57/738.63/534.41	673.1/708.42/614.97	541.57	673.1	0.31316	19443	3562.2	2.2038	0.98623	0.013769	0.027538	0.48465	TRUE
hsLibDrugV1Nik_05785	LRIG3	725.88/657.66/685.48	834.18/843.87/767.7	685.48	834.18	0.28287	1203.3	4553.4	2.2037	0.98623	0.013773	0.027547	0.48465	TRUE
hsLibDrugV1Nik_13850	ELSPBP1	20.71/0.98748/5.6651	35.477/18.275/0	5.6651	18.275	1.532	124.11	30.901	2.2684	0.98622	0.013776	0.027551	0.48465	TRUE
hsLibDrugV1Nik_15156	CFTR	365.53/297.23/267.2	385.45/393.45/445.04	297.23	393.45	0.4034	2783.3	1906.7	2.2034	0.98622	0.013782	0.027563	0.48465	TRUE
hsLibDrugV1Nik_24199	SIGLEC11	250.59/274.52/247.38	340.38/338.62/195.21	250.59	338.62	0.43285	291.43	1596.2	2.2034	0.98622	0.013783	0.027565	0.48465	TRUE
hsLibDrugV1Nik_11313	QDPR	418.34/242.92/353.13	483.25/397.75/458.19	353.13	458.19	0.37485	8199.3	2281.6	2.1997	0.98608	0.013916	0.027831	0.48832	TRUE
hsLibDrugV1Nik_09364	SMPD1	789.05/755.42/916.8	908.01/961.04/948.75	789.05	948.75	0.26561	8726	5272.4	2.1995	0.98608	0.013923	0.027846	0.48832	TRUE
hsLibDrugV1Nik_01184	PLAUR	693.78/694.2/754.4	888.83/661.12/843.56	694.2	843.56	0.28079	1812.6	4613.8	2.199	0.98606	0.013939	0.027877	0.48851	TRUE
hsLibDrugV1Nik_25673	CD207	171.89/127.38/116.13	208.07/144.05/189.14	127.38	189.14	0.56662	1053.8	788.95	2.1988	0.98605	0.013947	0.027894	0.48851	TRUE
hsLibDrugV1Nik_05557	BMP7	201.92/228.11/265.32	272.31/311.75/351.99	228.11	311.75	0.44897	1035.1	1447.3	2.1985	0.98604	0.013955	0.02791	0.48851	TRUE
hsLibDrugV1Nik_13523	KLHL18	906.06/800.84/817.66	941.57/1019.1/980.11	817.66	980.11	0.26114	4048.5	5471.8	2.1961	0.98596	0.014043	0.028087	0.48919	TRUE
hsLibDrugV1Nik_15592	F2R	214.35/161.95/170.9	190.81/256.92/242.75	170.9	242.75	0.50387	984.05	1071.4	2.1952	0.98593	0.014074	0.028148	0.48919	TRUE
hsLibDrugV1Nik_05303	PTGS2	687.57/674.45/612.78	669.26/821.29/851.65	674.45	821.29	0.28381	1987.7	4477.1	2.1946	0.98591	0.014095	0.028189	0.48919	TRUE
hsLibDrugV1Nik_25246	LRTOMT	171.89/176.76/276.65	261.76/134.37/249.83	176.76	249.83	0.49681	5000.6	1109.7	2.1936	0.98587	0.014131	0.028263	0.48919	TRUE
hsLibDrugV1Nik_13926	GPR26	682.39/721.84/774.23	823.63/887.94/873.91	721.84	873.91	0.27544	2150.4	4805.4	2.1936	0.98587	0.014132	0.028265	0.48919	TRUE
hsLibDrugV1Nik_03545	DYRK3	299.26/331.79/367.29	390.24/433.22/441	331.79	433.22	0.38381	1159.2	2138.2	2.1935	0.98586	0.014136	0.028272	0.48919	TRUE
hsLibDrugV1Nik_04339	NBL1	309.61/341.67/207.72	416.13/407.42/334.8	309.61	407.42	0.39493	5704.8	1989.5	2.1928	0.98584	0.014162	0.028324	0.48969	TRUE
hsLibDrugV1Nik_21249	ZP3	520.86/470.04/485.31	626.11/582.64/608.9	485.31	608.9	0.3267	748.34	3177.5	2.1925	0.98583	0.014171	0.028342	0.48969	TRUE
hsLibDrugV1Nik_11815	NEK3	704.14/813.68/765.73	922.39/824.52/967.97	765.73	922.39	0.26822	3046.4	5110.2	2.1915	0.98579	0.014209	0.028417	0.49015	TRUE
hsLibDrugV1Nik_16476	MAP3K4	703.1/575.7/577.84	762.27/577.27/713.08	577.84	713.08	0.30293	7847.6	3811.1	2.1907	0.98576	0.014236	0.028471	0.49076	TRUE
hsLibDrugV1Nik_24101	MST1R	410.06/362.4/372.01	479.41/367.65/497.64	372.01	479.41	0.36507	769.98	2408.8	2.1884	0.98568	0.014321	0.028642	0.49256	TRUE
hsLibDrugV1Nik_20486	NR2F2	226.77/117.51/107.64	176.42/179.52/168.91	117.51	176.42	0.5822	6018.1	725.37	2.1875	0.98565	0.014354	0.028708	0.49256	TRUE
hsLibDrugV1Nik_04780	LTB4R	243.34/408.81/292.7	390.24/274.12/387.39	292.7	387.39	0.40318	7959.6	1876.4	2.186	0.98559	0.014407	0.028814	0.49256	TRUE
hsLibDrugV1Nik_02614	THSD1	505.32/579.65/499.47	524.48/654.67/631.15	505.32	631.15	0.32022	2779.2	3314.2	2.1858	0.98558	0.014417	0.028833	0.49256	TRUE
hsLibDrugV1Nik_26820	NonTargetingGuide514	507.39/542.12/508.92	520.64/654.67/635.2	508.92	635.2	0.31922	552.57	3338.7	2.1856	0.98558	0.014424	0.028848	0.49256	TRUE
hsLibDrugV1Nik_09329	ABCA7	8.284/0/0	24.93/5.3749/6.0688	0.94418	6.0688	1.8623	34.312	4.7947	2.3403	0.98555	0.014446	0.028891	0.49256	TRUE
hsLibDrugV1Nik_26404	NonTargetingGuide098	9.3195/0/0	1.9177/11.825/6.0688	0.94418	6.0688	1.8623	43.426	4.7947	2.3403	0.98555	0.014446	0.028891	0.49256	TRUE
hsLibDrugV1Nik_02740	TNFRSF4	303.4/297.23/342.74	399.83/443.97/375.25	303.4	399.83	0.39702	792.78	1948	2.1848	0.98555	0.01445	0.0289	0.49256	TRUE
hsLibDrugV1Nik_10633	LIPG	214.35/256.74/305.92	345.18/345.07/304.45	256.74	345.07	0.42513	2107.6	1637	2.1831	0.98549	0.014515	0.029029	0.49321	TRUE
hsLibDrugV1Nik_20035	TLR2	752.81/697.16/692.09	845.69/784.74/857.72	697.16	845.69	0.27827	1561.3	4634.3	2.1818	0.98544	0.014562	0.029123	0.49419	TRUE
hsLibDrugV1Nik_12276	GLP1R	472.19/456.21/531.58	426.68/593.39/606.88	472.19	593.39	0.32901	1891.1	3088.1	2.1811	0.98541	0.014587	0.029174	0.49429	TRUE
hsLibDrugV1Nik_27139	NonTargetingGuide833	368.64/303.16/407.89	306.82/475.15/507.76	368.64	475.15	0.36529	2914.3	2386.1	2.1804	0.98539	0.014614	0.029228	0.49442	TRUE
hsLibDrugV1Nik_26054	BMP4	801.48/853.18/767.62	1020.2/961.04/802.09	801.48	961.04	0.26164	1909.7	5358.9	2.1797	0.98536	0.01464	0.02928	0.49443	TRUE
hsLibDrugV1Nik_18440	PKHD1	18.639/3.9499/2.8326	14.382/33.325/7.0803	3.9499	14.382	1.6358	108.51	21.236	2.2639	0.98534	0.014658	0.029317	0.49443	TRUE
hsLibDrugV1Nik_08396	SENP6	448.37/371.29/397.5	508.18/492.34/514.84	397.5	508.18	0.35359	1637.3	2581	2.1785	0.98532	0.014684	0.029368	0.49443	TRUE
hsLibDrugV1Nik_21890	GPR146	211.24/195.52/187.89	282.85/271.97/241.74	195.52	271.97	0.47408	152.67	1232.6	2.1776	0.98528	0.014719	0.029438	0.49443	TRUE
hsLibDrugV1Nik_19364	OXER1	871.89/853.18/944.18	780.49/1038.4/1651.7	871.89	1038.4	0.25193	2788.3	5850.4	2.1775	0.98528	0.014723	0.029445	0.49443	TRUE
hsLibDrugV1Nik_20315	ATF1	296.15/138.25/181.28	255.05/254.77/169.93	181.28	254.77	0.48868	7523.5	1139.3	2.1772	0.98527	0.014732	0.029463	0.49443	TRUE
hsLibDrugV1Nik_01480	F2RL1	906.06/762.33/777.06	933.9/753.57/944.71	777.06	933.9	0.26492	8428.6	5189	2.1772	0.98527	0.014732	0.029465	0.49443	TRUE
hsLibDrugV1Nik_27302	NonTargetingGuide996	231.95/211.32/324.8	315.45/226.82/322.66	231.95	315.45	0.44197	4523.2	1472.7	2.1759	0.98522	0.014781	0.029561	0.49443	TRUE
hsLibDrugV1Nik_20767	OCLN	625.44/661.61/641.1	761.31/862.14/782.87	641.1	782.87	0.28782	332.9	4246.7	2.1755	0.98521	0.014795	0.02959	0.49443	TRUE
hsLibDrugV1Nik_21095	TOP1MT	553.99/606.31/603.33	750.76/740.67/513.82	603.33	740.67	0.29543	1221.8	3986.4	2.1751	0.98519	0.01481	0.02962	0.49443	TRUE
hsLibDrugV1Nik_07736	CYP46A1	6.213/9.8748/15.107	18.218/29.025/26.298	9.8748	26.298	1.3278	20.392	55.085	2.2128	0.98519	0.014814	0.029627	0.49443	TRUE
hsLibDrugV1Nik_06460	DRD2	493.93/303.16/345.57	419.97/448.27/469.32	345.57	448.27	0.37443	11905	2230.8	2.1744	0.98516	0.014838	0.029676	0.49458	TRUE
hsLibDrugV1Nik_24276	ADAM8	0/16.787/1.8884	23.012/7.5249/9.1032	1.8884	9.1032	1.8065	112.77	9.8571	2.298	0.98516	0.014844	0.029689	0.49458	TRUE
hsLibDrugV1Nik_01926	CRISPLD2	147.04/242.92/118.97	285.73/212.85/128.46	147.04	212.85	0.53059	4990.4	916.12	2.1742	0.98515	0.014845	0.029691	0.49458	TRUE
hsLibDrugV1Nik_23351	PTGDR2	153.25/161.95/167.12	258.88/231.12/193.19	161.95	231.12	0.51049	51.166	1013	2.1735	0.98513	0.014873	0.029746	0.4952	TRUE
hsLibDrugV1Nik_03402	IFNL2	725.88/631/726.08	885.96/748.19/876.94	725.88	876.94	0.2724	4501.8	4833.4	2.1728	0.9851	0.014899	0.029798	0.49545	TRUE
hsLibDrugV1Nik_04535	EGFL8	225.74/275.51/242.66	327.92/191.35/344.91	242.66	327.92	0.43289	682.66	1543.6	2.1702	0.985	0.014995	0.029991	0.49805	TRUE
hsLibDrugV1Nik_18368	FAM3C	322.04/302.17/336.13	440.1/362.27/420.77	322.04	420.77	0.38474	296.72	2072.8	2.1686	0.98494	0.015058	0.030116	0.49953	TRUE
hsLibDrugV1Nik_13272	FGFR3	286.83/274.52/251.15	365.31/394.52/226.57	274.52	365.31	0.41093	348.79	1755.2	2.1672	0.98489	0.01511	0.03022	0.50095	TRUE
hsLibDrugV1Nik_02406	LALBA	799.4/977.6/761.96	816.92/957.82/1003.4	799.4	957.82	0.26052	16578	5344.5	2.1669	0.98488	0.015123	0.030246	0.50107	TRUE
hsLibDrugV1Nik_08067	CEACAM16	8.284/5.9249/11.33	15.341/31.175/23.264	8.284	23.264	1.386	7.4225	45.884	2.2114	0.98482	0.015184	0.030368	0.50187	TRUE
hsLibDrugV1Nik_08521	GSTA4	277.51/270.57/307.8	442.98/368.72/286.24	277.51	368.72	0.40869	482.88	1775.2	2.1648	0.9848	0.015203	0.030405	0.50208	TRUE
hsLibDrugV1Nik_08233	UMPS	500.15/509.54/443.77	635.7/534.27/624.07	500.15	624.07	0.3188	1633.4	3278.8	2.1643	0.98478	0.015221	0.030442	0.50208	TRUE
hsLibDrugV1Nik_17396	BCR	504.29/683.33/531.58	675.97/542.87/659.48	531.58	659.48	0.31052	11887	3493.7	2.1638	0.98476	0.015238	0.030477	0.50208	TRUE
hsLibDrugV1Nik_11627	OR4F4	445.26/433.5/701.53	561.87/601.99/548.21	445.26	561.87	0.33491	32905	2904.9	2.1636	0.98475	0.015249	0.030499	0.50208	TRUE
hsLibDrugV1Nik_00037	SLC5A9	653.4/495.71/487.2	660.63/617.04/619.02	495.71	619.02	0.3199	12469	3248.5	2.1634	0.98474	0.015256	0.030511	0.50208	TRUE
hsLibDrugV1Nik_08459	CAMK2A	210.21/174.78/148.24	246.42/305.3/227.58	174.78	246.42	0.49316	979.74	1096.8	2.1631	0.98473	0.015268	0.030537	0.50208	TRUE
hsLibDrugV1Nik_10848	EDIL3	593.34/530.27/532.52	683.64/654.67/660.49	532.52	660.49	0.31017	1852.1	3500.2	2.163	0.98473	0.015271	0.030543	0.50208	TRUE
hsLibDrugV1Nik_22217	RESP18	2.071/15.8/0	9.5883/21.5/1.0115	2.071	9.5883	1.7857	96.382	10.85	2.2821	0.98471	0.015288	0.030577	0.50208	TRUE
hsLibDrugV1Nik_09921	SLC18A2	325.15/353.52/396.56	541.74/456.87/320.63	353.52	456.87	0.36909	1328.7	2284.2	2.1625	0.98471	0.01529	0.030579	0.50208	TRUE
hsLibDrugV1Nik_21594	FGR	629.58/631.98/807.28	771.86/648.22/773.77	631.98	771.86	0.28803	15367	4183.8	2.1624	0.98471	0.015292	0.030584	0.50208	TRUE
hsLibDrugV1Nik_19330	PTPRJ	120.12/127.38/160.51	197.52/188.12/178.02	127.38	188.12	0.55886	575.1	788.95	2.1624	0.98471	0.015293	0.030586	0.50208	TRUE
hsLibDrugV1Nik_18716	CACNA1E	872.92/848.24/1106.6	1038.4/1057.8/915.38	872.92	1038.4	0.25018	27603	5857.6	2.1622	0.9847	0.015301	0.030601	0.50208	TRUE
hsLibDrugV1Nik_16947	IL25	511.54/398.94/418.27	558.04/531.04/377.28	418.27	531.04	0.34365	4535.8	2721.7	2.1616	0.98468	0.015324	0.030648	0.50254	TRUE
hsLibDrugV1Nik_07787	ALDH8A1	105.62/92.823/101.03	151.49/154.8/161.83	101.03	154.8	0.61072	44.209	619.75	2.1599	0.98461	0.01539	0.03078	0.50284	TRUE
hsLibDrugV1Nik_05866	GPR83	342.75/433.5/450.38	583.93/548.24/474.38	433.5	548.24	0.33809	4260.3	2825	2.1588	0.98457	0.015432	0.030864	0.50284	TRUE
hsLibDrugV1Nik_03648	HSD17B10	435.94/488.8/493.81	596.39/618.12/610.93	488.8	610.93	0.32116	1409.4	3201.4	2.1584	0.98455	0.015447	0.030895	0.50284	TRUE
hsLibDrugV1Nik_06397	DEFB115	898.81/905.52/1067.9	1073.9/1081.4/886.04	905.52	1073.9	0.24578	13202	6085.7	2.1583	0.98455	0.015451	0.030903	0.50284	TRUE
hsLibDrugV1Nik_04789	ANGPT4	503.25/423.63/377.67	536.94/631.02/395.48	423.63	536.94	0.34126	4225.9	2758	2.1577	0.98453	0.015474	0.030949	0.50284	TRUE
hsLibDrugV1Nik_22234	SPINK1	124.26/160.96/101.97	340.38/178.45/184.09	124.26	184.09	0.56328	921.77	768.81	2.1577	0.98452	0.015476	0.030953	0.50284	TRUE
hsLibDrugV1Nik_12831	DHRSX	196.74/187.62/186	261.76/299.92/174.98	187.62	261.76	0.47826	42.932	1180.8	2.1576	0.98452	0.015481	0.030962	0.50284	TRUE
hsLibDrugV1Nik_18191	GP1BA	255.77/248.84/320.08	263.68/383.77/342.89	255.77	342.89	0.42147	2091.9	1630.5	2.1575	0.98452	0.015484	0.030968	0.50284	TRUE
hsLibDrugV1Nik_19131	KIR2DL4	23.816/10.862/7.5535	33.559/27.95/23.264	10.862	27.95	1.2872	89.38	60.828	2.1909	0.9845	0.015497	0.030995	0.50284	TRUE
hsLibDrugV1Nik_21019	DRD4	187.43/226.13/219.05	322.17/164.47/299.39	219.05	299.39	0.44902	525.16	1387.5	2.1569	0.98449	0.015506	0.031013	0.50284	TRUE
hsLibDrugV1Nik_08584	SLURP1	469.08/310.07/270.98	413.25/406.35/267.03	310.07	406.35	0.38903	13406	1992.6	2.1569	0.98449	0.015508	0.031017	0.50284	TRUE
hsLibDrugV1Nik_20286	PPIL6	741.42/716.91/722.3	858.15/871.82/895.15	722.3	871.82	0.27108	197.25	4808.5	2.1561	0.98446	0.015536	0.031072	0.50284	TRUE
hsLibDrugV1Nik_22429	TAC1	32.1/40.487/28.326	38.353/82.774/61.699	32.1	61.699	0.9216	42.288	187.86	2.1595	0.98445	0.015554	0.031109	0.50313	TRUE
hsLibDrugV1Nik_24457	KRT19	326.18/225.14/255.87	326.96/342.92/399.53	255.87	342.92	0.42102	2943.8	1631.2	2.1553	0.98443	0.015571	0.031142	0.50337	TRUE
hsLibDrugV1Nik_09064	CCDC3	697.93/492.75/561.79	663.51/744.97/692.85	561.79	692.85	0.30204	11650	3700.9	2.1544	0.9844	0.015603	0.031206	0.50411	TRUE
hsLibDrugV1Nik_15895	FGF10	306.51/250.82/317.25	453.53/402.05/322.66	306.51	402.05	0.39032	1608.3	1968.8	2.1532	0.98435	0.015652	0.031304	0.50522	TRUE
hsLibDrugV1Nik_09384	PRKCH	307.54/250.82/259.65	394.08/347.22/281.19	259.65	347.22	0.41789	1185.8	1656.3	2.1517	0.98429	0.01571	0.031419	0.50607	TRUE
hsLibDrugV1Nik_04752	MMP10	580.91/596.44/543.85	750.76/526.74/714.09	580.91	714.09	0.29733	807.33	3832.2	2.1514	0.98428	0.015723	0.031447	0.50607	TRUE
hsLibDrugV1Nik_04493	ALPL	275.44/131.33/130.3	192.72/121.47/237.69	131.33	192.72	0.54982	10384	814.44	2.1511	0.98427	0.015733	0.031466	0.50607	TRUE
hsLibDrugV1Nik_13214	SIGLEC1	172.93/189.6/129.35	299.15/240.8/243.76	172.93	243.76	0.4929	1088.3	1084.7	2.1508	0.98425	0.015746	0.031492	0.50607	TRUE
hsLibDrugV1Nik_01997	PTPN2	390.38/215.27/236.05	319.29/250.47/380.31	236.05	319.29	0.43421	12126	1499.8	2.1495	0.9842	0.015798	0.031596	0.50607	TRUE
hsLibDrugV1Nik_19192	BPIFC	163.61/167.87/248.32	248.34/237.57/221.51	167.87	237.57	0.49851	3245.2	1051.6	2.1494	0.9842	0.015803	0.031606	0.50607	TRUE
hsLibDrugV1Nik_16297	CALCB	347.93/251.81/249.26	420.93/333.25/337.83	251.81	337.83	0.42253	4622.9	1604.2	2.1477	0.98413	0.015867	0.031734	0.50663	TRUE
hsLibDrugV1Nik_08834	FSTL4	485.65/279.46/360.68	375.86/464.4/474.38	360.68	464.4	0.36375	11107	2332.5	2.1475	0.98412	0.015875	0.03175	0.50663	TRUE
hsLibDrugV1Nik_08378	NLGN3	426.63/415.73/516.47	539.82/428.92/550.24	426.63	539.82	0.3388	4095.3	2778.3	2.1475	0.98412	0.015876	0.031753	0.50663	TRUE
hsLibDrugV1Nik_05928	WNT7B	317.9/314.02/382.39	551.33/414.95/378.29	317.9	414.95	0.3833	2087.4	2045	2.146	0.98406	0.015935	0.03187	0.50745	TRUE
hsLibDrugV1Nik_22011	CDNF	542.6/590.51/572.18	743.09/622.42/703.98	572.18	703.98	0.29861	605.41	3772.2	2.146	0.98406	0.015935	0.031871	0.50745	TRUE
hsLibDrugV1Nik_07101	PSAP	276.48/193.55/260.59	348.05/179.52/351.99	260.59	348.05	0.41612	2374	1662.6	2.1449	0.98402	0.015979	0.031958	0.50842	TRUE
hsLibDrugV1Nik_23574	CBR3	356.21/279.46/260.59	370.11/389.15/360.08	279.46	370.11	0.40406	3123.6	1788.1	2.1438	0.98397	0.016025	0.032051	0.50907	TRUE
hsLibDrugV1Nik_21575	CSF3	336.54/345.62/398.45	446.81/446.12/447.07	345.62	446.81	0.36956	1436.7	2231.1	2.1424	0.98392	0.016079	0.032158	0.5096	TRUE
hsLibDrugV1Nik_02928	PYGL	484.61/367.34/427.72	540.78/568.67/488.54	427.72	540.78	0.33768	3441.2	2785.7	2.1422	0.98391	0.01609	0.03218	0.5096	TRUE
hsLibDrugV1Nik_19127	SMAD3	122.19/193.55/103.86	55.612/199.95/181.05	122.19	181.05	0.56348	2713.8	755.47	2.1416	0.98389	0.016113	0.032226	0.50962	TRUE
hsLibDrugV1Nik_07913	RPS6KA3	714.49/759.37/672.26	864.86/862.14/831.42	714.49	862.14	0.27066	1898.8	4754.4	2.1413	0.98388	0.016125	0.03225	0.50962	TRUE
hsLibDrugV1Nik_09925	ALDH3B2	570.56/451.28/428.66	474.62/603.07/567.43	451.28	567.43	0.32978	7370	2945.8	2.1401	0.98383	0.016172	0.032343	0.50962	TRUE
hsLibDrugV1Nik_07932	PSMB9	184.32/150.1/162.4	198.48/282.72/230.61	162.4	230.61	0.50332	315.91	1016	2.1401	0.98383	0.016173	0.032347	0.50962	TRUE
hsLibDrugV1Nik_00653	ENTPD1	879.14/833.43/732.69	820.76/993.29/1015.5	833.43	993.29	0.25288	6119.1	5581.7	2.1397	0.98381	0.016189	0.032378	0.50962	TRUE
hsLibDrugV1Nik_23345	PPP1CA	421.45/698.15/444.71	559.96/549.32/644.3	444.71	559.96	0.33178	32385	2901.1	2.1396	0.98381	0.016193	0.032385	0.50962	TRUE
hsLibDrugV1Nik_18776	CXCL16	237.13/281.43/274.76	360.52/364.42/515.85	274.76	364.42	0.40616	730.22	1756.8	2.1392	0.98379	0.016209	0.032419	0.50962	TRUE
hsLibDrugV1Nik_19065	GABRG1	474.26/473.99/490.03	585.84/593.39/721.18	474.26	593.39	0.32271	124.44	3102.2	2.139	0.98378	0.016218	0.032437	0.50962	TRUE
hsLibDrugV1Nik_15076	GABRR2	603.7/525.34/539.13	688.44/666.49/507.76	539.13	666.49	0.30545	2179.5	3545.5	2.139	0.98378	0.016218	0.032436	0.50962	TRUE
hsLibDrugV1Nik_24908	TGM2	267.16/494.73/333.3	432.43/452.57/425.83	333.3	432.43	0.37467	15217	2148.3	2.1388	0.98377	0.016225	0.03245	0.50962	TRUE
hsLibDrugV1Nik_26018	PSG2	977.51/760.36/698.7	926.23/912.67/863.79	760.36	912.67	0.26309	25479	5072.8	2.1385	0.98376	0.016239	0.032479	0.50962	TRUE
hsLibDrugV1Nik_21399	WNT10A	587.13/551.01/674.15	539.82/720.24/730.28	587.13	720.24	0.29436	4438.4	3874.9	2.1384	0.98376	0.016241	0.032481	0.50962	TRUE
hsLibDrugV1Nik_21322	POMC	792.16/760.36/953.63	827.47/1056.7/947.74	792.16	947.74	0.25841	13542	5294	2.1384	0.98376	0.016244	0.032487	0.50962	TRUE
hsLibDrugV1Nik_24087	GALP	781.8/737.64/761.01	923.35/855.69/913.35	761.01	913.35	0.26294	489.12	5077.4	2.138	0.98374	0.01626	0.032521	0.50962	TRUE
hsLibDrugV1Nik_19469	AADAT	7.2485/0/27.381	21.094/34.4/20.229	7.2485	21.094	1.4215	228.94	39.933	2.191	0.98373	0.016269	0.032539	0.50962	TRUE
hsLibDrugV1Nik_07530	PRSS3	667.9/672.47/616.55	810.21/824.52/740.39	667.9	810.21	0.27829	1328.6	4431.8	2.1377	0.98373	0.016269	0.032538	0.50962	TRUE
hsLibDrugV1Nik_02039	CREBBP	623.37/584.59/669.43	666.39/772.92/760.62	623.37	760.62	0.28667	1812.7	4124.4	2.1372	0.98371	0.016292	0.032584	0.51005	TRUE
hsLibDrugV1Nik_00055	GPC4	565.38/617.17/742.13	783.36/522.44/753.54	617.17	753.54	0.28759	9148.2	4081.7	2.1345	0.9836	0.016401	0.032802	0.51244	TRUE
hsLibDrugV1Nik_07702	PLA2G12A	168.79/112.57/112.36	156.29/168.77/178.02	112.57	168.77	0.58	1580	693.66	2.1339	0.98357	0.016426	0.032853	0.51269	TRUE
hsLibDrugV1Nik_09263	EGFL6	523.96/505.59/645.82	649.13/640.69/685.77	523.96	649.13	0.30851	7593.8	3441.6	2.1335	0.98356	0.016441	0.032881	0.51269	TRUE
hsLibDrugV1Nik_19885	ANGPTL1	0/5.9249/2.8326	11.506/9.6749/19.218	2.8326	11.506	1.7062	8.7928	15.027	2.2375	0.98355	0.016453	0.032907	0.51269	TRUE
hsLibDrugV1Nik_00227	BGN	447.34/378.2/330.46	450.65/483.75/492.58	378.2	483.75	0.35426	3529.1	2450.6	2.132	0.9835	0.016504	0.033008	0.51269	TRUE
hsLibDrugV1Nik_00232	KLHL4	392.45/397.95/403.17	544.61/506.32/334.8	397.95	506.32	0.34668	28.712	2584.1	2.1318	0.98349	0.016512	0.033024	0.51269	TRUE
hsLibDrugV1Nik_01872	KERA	792.16/794.92/1049.9	992.39/950.29/845.59	794.92	950.29	0.25727	32520	5313.3	2.1315	0.98348	0.016522	0.033045	0.51269	TRUE
hsLibDrugV1Nik_09025	TEK	167.75/160.96/283.26	236.83/309.6/217.47	167.75	236.83	0.49504	6693.7	1050.9	2.131	0.98345	0.016546	0.033091	0.51269	TRUE
hsLibDrugV1Nik_18366	FAM3C	780.77/816.64/857.32	974.17/1027.7/903.24	816.64	974.17	0.25418	1470.9	5464.6	2.1309	0.98345	0.016547	0.033093	0.51269	TRUE
hsLibDrugV1Nik_10241	OR4D9	269.23/290.32/276.65	366.27/395.6/365.14	276.65	366.27	0.4036	120.96	1769.4	2.1307	0.98344	0.016557	0.033114	0.51269	TRUE
hsLibDrugV1Nik_06179	KLHL30	324.11/402.89/339.91	499.55/439.67/335.81	339.91	439.67	0.37032	2108.2	2192.7	2.1305	0.98344	0.016565	0.033129	0.51269	TRUE
hsLibDrugV1Nik_27136	NonTargetingGuide830	1249.8/1226.4/1523.9	1478.5/1443.7/1446.4	1249.8	1446.4	0.21056	37830	8514.3	2.1301	0.98342	0.016582	0.033164	0.51293	TRUE
hsLibDrugV1Nik_25990	CALU	595.41/890.7/642.05	870.62/737.44/780.85	642.05	780.85	0.28197	32003	4253.2	2.1284	0.98335	0.016653	0.033306	0.51408	TRUE
hsLibDrugV1Nik_17389	BMP1	362.42/368.33/321.02	428.6/465.47/494.61	362.42	465.47	0.36013	874.48	2344.2	2.1283	0.98334	0.016657	0.033313	0.51408	TRUE
hsLibDrugV1Nik_18587	CA13	956.8/1107/903.58	1263.7/1127.7/1076.2	956.8	1127.7	0.23682	12690	6445.2	2.1283	0.98334	0.016657	0.033313	0.51408	TRUE
hsLibDrugV1Nik_09289	MUC15	577.81/655.68/569.34	784.32/558.99/709.04	577.81	709.04	0.29481	3068.2	3810.9	2.1258	0.98324	0.01676	0.033521	0.51474	TRUE
hsLibDrugV1Nik_01137	ROR1	213.31/202.43/193.56	306.82/278.42/151.72	202.43	278.42	0.4579	98.568	1278	2.1256	0.98323	0.016768	0.033537	0.51474	TRUE
hsLibDrugV1Nik_06795	NLGN4Y	235.06/309.08/271.93	360.52/297.77/363.12	271.93	360.52	0.40557	1369.8	1738	2.1251	0.98321	0.016788	0.033576	0.51474	TRUE
hsLibDrugV1Nik_09652	CHRNA6	1159.8/1067.5/1023.5	1257/1248.1/1194.5	1067.5	1248.1	0.22531	5225.8	7223.8	2.1249	0.9832	0.016798	0.033595	0.51474	TRUE
hsLibDrugV1Nik_26374	NonTargetingGuide068	365.53/265.63/397.5	468.87/482.67/413.69	365.53	468.87	0.35832	5501.1	2365.2	2.1248	0.9832	0.016801	0.033602	0.51474	TRUE
hsLibDrugV1Nik_19107	KCNT2	37.278/7.8998/6.6093	13.424/36.55/22.252	7.8998	22.252	1.3855	432.37	43.673	2.1718	0.98311	0.016894	0.033789	0.51619	TRUE
hsLibDrugV1Nik_11299	MAT1A	634.76/808.74/763.85	976.09/718.09/915.38	763.85	915.38	0.26077	9339.3	5097	2.1225	0.9831	0.016899	0.033798	0.51619	TRUE
hsLibDrugV1Nik_02733	GPR151	263.02/259.71/297.42	349.97/226.82/355.02	263.02	349.97	0.41073	597.21	1678.7	2.1223	0.98309	0.016905	0.03381	0.51619	TRUE
hsLibDrugV1Nik_25980	MPO	336.54/385.12/336.13	490.92/435.37/290.29	336.54	435.37	0.37051	1180	2170.1	2.1216	0.98307	0.016935	0.03387	0.51643	TRUE
hsLibDrugV1Nik_09149	TUBB4A	1627.8/1737/1515.4	1852.5/1854.4/1805.5	1627.8	1852.5	0.18641	12274	11213	2.1215	0.98306	0.016939	0.033877	0.51643	TRUE
hsLibDrugV1Nik_22838	NOS3	619.23/615.2/576.9	627.07/756.79/750.51	615.2	750.51	0.2864	741.59	4068.1	2.1215	0.98306	0.016942	0.033883	0.51643	TRUE
hsLibDrugV1Nik_23269	ULK1	3.1065/0/23.605	6.7118/22.575/12.138	3.1065	12.138	1.6777	214.91	16.541	2.2205	0.98303	0.016966	0.033932	0.51676	TRUE
hsLibDrugV1Nik_04651	RHD	427.66/488.8/429.6	492.84/541.79/607.89	429.6	541.79	0.33404	1754	2798.5	2.1208	0.98303	0.016971	0.033942	0.51676	TRUE
hsLibDrugV1Nik_08192	TLR1	721.74/772.21/678.87	868.7/797.64/907.28	721.74	868.7	0.26703	2192.4	4804.7	2.1201	0.983	0.016999	0.033998	0.51717	TRUE
hsLibDrugV1Nik_23879	TNFRSF11A	414.2/302.17/298.36	211.9/418.17/395.48	302.17	395.48	0.38714	6282.8	1939.7	2.1188	0.98294	0.017055	0.03411	0.51829	TRUE
hsLibDrugV1Nik_22001	LTBP1	162.57/121.46/127.46	186.97/294.55/114.3	127.46	186.97	0.54914	634.33	789.47	2.1179	0.98291	0.017094	0.034188	0.51829	TRUE
hsLibDrugV1Nik_05003	F10	949.55/661.61/743.07	755.56/906.22/892.11	743.07	892.11	0.2634	24635	4952.7	2.1178	0.9829	0.017097	0.034194	0.51829	TRUE
hsLibDrugV1Nik_25437	ITGA2B	148.08/175.77/99.139	230.12/185.97/212.41	148.08	212.41	0.51756	1580.9	922.84	2.1177	0.9829	0.017101	0.034201	0.51829	TRUE
hsLibDrugV1Nik_06454	TTBK1	463.9/447.33/524.97	466.95/580.49/618.01	463.9	580.49	0.32283	2001.8	3031.7	2.1175	0.98289	0.017109	0.034217	0.51829	TRUE
hsLibDrugV1Nik_06446	DRAXIN	258.87/245.88/336.13	335.59/380.55/344.91	258.87	344.91	0.41258	3068.6	1651.2	2.1173	0.98288	0.017117	0.034235	0.51829	TRUE
hsLibDrugV1Nik_00321	CHRNA2	301.33/336.73/350.29	438.18/435.37/425.83	336.73	435.37	0.36969	718.53	2171.4	2.1169	0.98286	0.017136	0.034271	0.51829	TRUE
hsLibDrugV1Nik_15075	GABRR2	406.95/549.04/407.89	516.81/629.94/445.04	407.89	516.81	0.34071	9961.9	2651.3	2.1153	0.9828	0.017201	0.034402	0.51998	TRUE
hsLibDrugV1Nik_10756	DMPK	633.72/514.47/552.35	679.81/658.97/815.24	552.35	679.81	0.29906	4028.3	3636.1	2.1138	0.98273	0.017267	0.034534	0.52126	TRUE
hsLibDrugV1Nik_03937	ADRB1	441.12/326.85/303.08	445.85/339.7/423.8	326.85	423.8	0.37374	6811.1	2105.1	2.1131	0.9827	0.017298	0.034595	0.52129	TRUE
hsLibDrugV1Nik_02098	P2RY13	421.45/461.15/416.39	583.93/532.12/407.62	421.45	532.12	0.33569	800.99	2743.2	2.113	0.9827	0.017299	0.034597	0.52129	TRUE
hsLibDrugV1Nik_16601	CHST2	347.93/328.83/413.55	454.48/383.77/448.08	347.93	448.08	0.36404	2335.7	2246.6	2.113	0.9827	0.017302	0.034603	0.52129	TRUE
hsLibDrugV1Nik_00854	TNNC1	727.96/722.83/738.35	602.14/875.04/999.33	727.96	875.04	0.26517	67.172	4847.8	2.1125	0.98268	0.017321	0.034642	0.52149	TRUE
hsLibDrugV1Nik_07424	LRRC55	15.532/38.512/16.051	7.6706/40.85/36.413	16.051	36.413	1.1337	252.37	91.321	2.1307	0.98264	0.017363	0.034727	0.52149	TRUE
hsLibDrugV1Nik_23303	MTOR	86.982/97.76/136.91	149.58/149.42/148.69	97.76	149.42	0.60703	824.32	598.89	2.1111	0.98262	0.017383	0.034765	0.52171	TRUE
hsLibDrugV1Nik_25887	CASR	491.86/598.41/473.04	698.03/611.67/539.11	491.86	611.67	0.31392	5853.5	3222.2	2.1106	0.9826	0.017404	0.034808	0.52185	TRUE
hsLibDrugV1Nik_08660	IKBKE	372.78/426.59/358.79	583.93/422.47/476.4	372.78	476.4	0.35301	1545.6	2414	2.109	0.98253	0.017472	0.034945	0.52242	TRUE
hsLibDrugV1Nik_19197	CXCL3	385.21/339.69/422.05	628.03/469.77/490.56	385.21	490.56	0.348	1714.5	2497.9	2.108	0.98248	0.017516	0.035032	0.52283	TRUE
hsLibDrugV1Nik_02428	CSNK1G2	332.39/267.61/234.16	380.65/354.75/263.99	267.61	354.75	0.40536	2658.2	1709.2	2.1078	0.98247	0.017526	0.035051	0.52283	TRUE
hsLibDrugV1Nik_07790	SGK1	285.8/200.46/209.61	175.47/313.9/286.24	209.61	286.24	0.44771	2944.2	1325.3	2.1051	0.98236	0.01764	0.035279	0.52371	TRUE
hsLibDrugV1Nik_06909	RXRB	240.24/257.73/225.66	411.34/322.5/291.3	240.24	322.5	0.42331	259.27	1527.5	2.1047	0.98234	0.017657	0.035313	0.52371	TRUE
hsLibDrugV1Nik_08394	SENP6	442.16/444.36/410.72	555.16/400.97/706	442.16	555.16	0.32768	496.59	2883.8	2.1043	0.98232	0.017675	0.035351	0.52371	TRUE
hsLibDrugV1Nik_07161	GABRD	114.94/162.93/164.29	230.12/269.82/179.03	162.93	230.12	0.49552	1152.6	1019.5	2.1042	0.98232	0.01768	0.03536	0.52371	TRUE
hsLibDrugV1Nik_11835	DNMT3B	741.42/578.66/645.82	783.36/723.47/789.95	645.82	783.36	0.27815	6824.5	4279.3	2.1025	0.98225	0.017753	0.035507	0.52394	TRUE
hsLibDrugV1Nik_25375	COL15A1	1101.8/1143.5/1146.2	1293.5/1328.7/1336.1	1143.5	1328.7	0.21637	874.32	7760.7	2.1022	0.98223	0.01777	0.035539	0.52409	TRUE
hsLibDrugV1Nik_10754	DMPK	477.36/393.02/398.45	505.3/448.27/667.57	398.45	505.3	0.342	3128.8	2587.4	2.1007	0.98217	0.017833	0.035666	0.52511	TRUE
hsLibDrugV1Nik_12353	HTR3C	850.14/796.89/900.75	1008.7/824.52/1108.6	850.14	1008.7	0.24643	2698.4	5698.4	2.1002	0.98215	0.017854	0.035708	0.52543	TRUE
hsLibDrugV1Nik_16365	GPR27	258.87/351.54/268.15	317.37/367.65/355.02	268.15	355.02	0.40357	3520.2	1712.8	2.0992	0.9821	0.017902	0.035803	0.52561	TRUE
hsLibDrugV1Nik_12209	CTSG	634.76/631.98/726.08	781.44/770.77/702.97	634.76	770.77	0.27968	4173.3	4203	2.0979	0.98204	0.017958	0.035915	0.52678	TRUE
hsLibDrugV1Nik_19425	ADA2	352.07/417.7/485.31	451.61/527.82/526.97	417.7	526.97	0.33454	4439.3	2717.8	2.096	0.98196	0.01804	0.03608	0.52694	TRUE
hsLibDrugV1Nik_10526	FGFBP1	946.45/836.39/814.83	924.31/1013.7/993.26	836.39	993.26	0.24772	6288.3	5602.4	2.0958	0.98195	0.018051	0.036102	0.52694	TRUE
hsLibDrugV1Nik_08563	GHRH	416.27/549.04/752.52	675.01/679.39/578.56	549.04	675.01	0.29753	29515	3613.4	2.0958	0.98195	0.018052	0.036104	0.52694	TRUE
hsLibDrugV1Nik_20297	ANTXR2	134.61/140.22/203	191.77/202.1/217.47	140.22	202.1	0.52422	1986.3	871.91	2.0955	0.98194	0.018063	0.036126	0.52694	TRUE
hsLibDrugV1Nik_03296	AMPD1	704.14/440.41/508.92	629.95/570.82/662.51	508.92	629.95	0.30727	21402	3338.7	2.0947	0.9819	0.018099	0.036199	0.52694	TRUE
hsLibDrugV1Nik_07376	MMP25	399.7/228.11/249.26	332.71/280.57/412.68	249.26	332.71	0.41515	11540	1587.4	2.0945	0.98189	0.018108	0.036216	0.52694	TRUE
hsLibDrugV1Nik_13251	IL7R	388.31/359.44/611.83	493.8/493.42/446.06	388.31	493.42	0.34481	25397	2518.9	2.0943	0.98188	0.018118	0.036237	0.52694	TRUE
hsLibDrugV1Nik_12584	CSF1R	301.33/317.97/338.02	337.51/425.7/412.68	317.97	412.68	0.3751	339.42	2045.5	2.0941	0.98188	0.018125	0.036249	0.52694	TRUE
hsLibDrugV1Nik_10320	CYP2J2	510.5/720.86/518.36	640.5/638.54/645.32	518.36	640.5	0.30472	20534	3403.3	2.0937	0.98186	0.018145	0.036289	0.52694	TRUE
hsLibDrugV1Nik_24227	CTBS	310.65/466.09/301.19	321.21/404.2/425.83	310.65	404.2	0.3787	12125	1996.5	2.0936	0.98185	0.018148	0.036295	0.52694	TRUE
hsLibDrugV1Nik_10956	IGLV5-37	0/1.975/11.33	10.547/0/9.1032	1.975	9.1032	1.7639	45.711	10.327	2.2181	0.98183	0.018168	0.036336	0.52694	TRUE
hsLibDrugV1Nik_24600	RRM1	248.52/248.84/225.66	297.24/348.3/331.76	248.52	331.76	0.41533	261.33	1582.4	2.0926	0.98181	0.018195	0.036389	0.52694	TRUE
hsLibDrugV1Nik_02471	ANGPTL3	716.56/563.85/676.98	850.48/598.77/817.26	676.98	817.26	0.27132	7182.9	4494.6	2.0925	0.9818	0.018198	0.036395	0.52694	TRUE
hsLibDrugV1Nik_05297	CD5L	687.57/588.54/607.11	602.14/739.59/745.45	607.11	739.59	0.28435	3409.4	4012.4	2.0915	0.98176	0.018243	0.036485	0.52694	TRUE
hsLibDrugV1Nik_02761	GFER	459.76/543.11/492.86	627.07/611.67/535.07	492.86	611.67	0.31099	1810.3	3229.1	2.0907	0.98172	0.018277	0.036555	0.52694	TRUE
hsLibDrugV1Nik_14585	TREM1	366.57/306.12/282.31	365.31/398.82/424.82	306.12	398.82	0.38056	2110.4	1966.1	2.0907	0.98172	0.018278	0.036557	0.52694	TRUE
hsLibDrugV1Nik_15402	SIDT2	149.11/172.81/183.17	241.62/205.32/247.81	172.81	241.62	0.48123	334.46	1083.9	2.0903	0.9817	0.018297	0.036594	0.52694	TRUE
hsLibDrugV1Nik_19434	SULT2B1	960.94/804.79/880.92	929.1/1041.7/1126.8	880.92	1041.7	0.24155	6099.5	5913.6	2.0903	0.9817	0.018297	0.036594	0.52694	TRUE
hsLibDrugV1Nik_14172	GZMH	328.25/376.23/439.05	479.41/465.47/535.07	376.23	479.41	0.34884	3123.8	2437.3	2.0901	0.98169	0.018305	0.03661	0.52694	TRUE
hsLibDrugV1Nik_13041	NMBR	703.1/671.48/834.66	884.04/846.02/766.69	703.1	846.02	0.2666	9153.4	4675.5	2.0901	0.98169	0.018306	0.036612	0.52694	TRUE
hsLibDrugV1Nik_19271	SRM	454.58/420.66/451.32	564.75/471.92/569.46	451.32	564.75	0.32282	475.21	2946.1	2.0898	0.98168	0.018318	0.036635	0.52694	TRUE
hsLibDrugV1Nik_04243	FKBP8	321/351.54/321.97	356.68/417.1/441	321.97	417.1	0.37245	437.79	2072.3	2.0897	0.98168	0.018322	0.036644	0.52694	TRUE
hsLibDrugV1Nik_27266	NonTargetingGuide960	360.35/301.18/412.61	461.2/370.87/516.86	360.35	461.2	0.35509	3116	2330.3	2.089	0.98165	0.018353	0.036706	0.52694	TRUE
hsLibDrugV1Nik_20916	LOXL2	303.4/312.04/343.68	385.45/427.85/405.6	312.04	405.6	0.37724	537.91	2005.8	2.0889	0.98164	0.018357	0.036713	0.52694	TRUE
hsLibDrugV1Nik_05346	NMUR2	457.69/499.66/539.13	652/619.19/619.02	499.66	619.19	0.30888	1659.7	3275.5	2.0885	0.98163	0.018375	0.03675	0.52694	TRUE
hsLibDrugV1Nik_08728	TBK1	579.88/616.18/555.18	539.82/718.09/709.04	579.88	709.04	0.28966	964.06	3825.1	2.0883	0.98162	0.018383	0.036766	0.52694	TRUE
hsLibDrugV1Nik_20925	CALM2	393.49/619.15/443.77	556.12/594.47/473.37	443.77	556.12	0.32494	16643	2894.7	2.0883	0.98161	0.018387	0.036775	0.52694	TRUE
hsLibDrugV1Nik_04833	KCNN2	120.12/103.68/150.13	144.78/196.72/177.01	120.12	177.01	0.55552	585.25	742.14	2.0882	0.98161	0.018388	0.036776	0.52694	TRUE
hsLibDrugV1Nik_10041	ITM2B	11.39/6.9123/5.6651	20.135/25.8/0	6.9123	20.135	1.4175	10.805	38.008	2.1448	0.98161	0.018395	0.036789	0.52694	TRUE
hsLibDrugV1Nik_10244	OR4D9	0/3.9499/6.6093	17.259/13.975/6.0688	3.9499	13.975	1.5971	11.337	21.236	2.1755	0.9816	0.018398	0.036796	0.52694	TRUE
hsLibDrugV1Nik_19355	CD151	526.03/460.16/464.54	564.75/639.62/579.57	464.54	579.57	0.31857	1900.3	3036	2.0877	0.98159	0.018413	0.036826	0.52709	TRUE
hsLibDrugV1Nik_12942	ENC1	304.44/195.52/242.66	217.65/324.65/707.01	242.66	324.65	0.41847	3019.3	1543.6	2.0869	0.98155	0.018448	0.036895	0.52732	TRUE
hsLibDrugV1Nik_10239	CXCR6	713.46/839.35/699.64	857.19/935.24/706	713.46	857.19	0.26445	8020.4	4747.2	2.0861	0.98152	0.018484	0.036968	0.52732	TRUE
hsLibDrugV1Nik_23277	C5	268.19/257.73/230.38	342.3/278.42/365.14	257.73	342.3	0.40802	428.75	1643.6	2.086	0.98151	0.018487	0.036974	0.52732	TRUE
hsLibDrugV1Nik_23706	CYP2C18	410.06/534.22/385.23	517.77/521.37/452.13	410.06	517.77	0.33575	8017	2666	2.086	0.98151	0.018487	0.036975	0.52732	TRUE
hsLibDrugV1Nik_18574	NTN1	560.2/366.35/360.68	467.91/439.67/486.52	366.35	467.91	0.35214	18805	2370.7	2.0857	0.9815	0.018501	0.037002	0.52732	TRUE
hsLibDrugV1Nik_14294	MATN2	248.52/195.52/195.45	233.95/268.75/326.7	195.52	268.75	0.45693	1404.5	1232.6	2.0857	0.9815	0.018502	0.037004	0.52732	TRUE
hsLibDrugV1Nik_13766	UPP1	465.97/635.93/422.99	581.05/609.52/463.25	465.97	581.05	0.3178	15367	3045.8	2.0851	0.98147	0.018528	0.037057	0.52763	TRUE
hsLibDrugV1Nik_03382	TIMP3	199.85/206.38/282.31	269.43/281.65/299.39	206.38	281.65	0.44671	2903.9	1304	2.0842	0.98143	0.018569	0.037138	0.52851	TRUE
hsLibDrugV1Nik_06622	MAPKAPK5	113.9/167.87/224.72	279.02/235.42/228.59	167.87	235.42	0.48545	3071.8	1051.6	2.0831	0.98138	0.018623	0.037246	0.52931	TRUE
hsLibDrugV1Nik_24541	DDOST	504.29/488.8/601.45	517.77/681.54/624.07	504.29	624.07	0.30692	4839.8	3307.1	2.083	0.98137	0.018626	0.037253	0.52931	TRUE
hsLibDrugV1Nik_02245	HTR1A	642.01/590.51/717.58	668.3/881.49/777.82	642.01	777.82	0.27645	4181.6	4253	2.0825	0.98135	0.01865	0.037299	0.52969	TRUE
hsLibDrugV1Nik_14547	RPS6KA1	517.75/454.24/420.16	610.77/567.59/551.25	454.24	567.59	0.32078	2597.4	2965.9	2.0814	0.9813	0.018697	0.037394	0.53076	TRUE
hsLibDrugV1Nik_00021	ADH4	499.11/484.85/571.23	578.17/618.12/645.32	499.11	618.12	0.30797	2702.4	3271.7	2.0806	0.98126	0.018735	0.03747	0.53112	TRUE
hsLibDrugV1Nik_19081	APOA1	439.05/574.71/432.44	550.37/492.34/606.88	439.05	550.37	0.32534	9223.6	2862.7	2.0805	0.98126	0.018739	0.037478	0.53112	TRUE
hsLibDrugV1Nik_10770	HMOX1	536.39/485.84/490.98	623.24/489.12/608.9	490.98	608.9	0.30999	1044.3	3216.2	2.0794	0.98121	0.01879	0.03758	0.53201	TRUE
hsLibDrugV1Nik_18272	GPR18	562.28/503.61/484.37	518.73/710.57/623.06	503.61	623.06	0.30652	1905.9	3302.5	2.0786	0.98117	0.018828	0.037656	0.53225	TRUE
hsLibDrugV1Nik_01316	LGALS8	373.81/304.14/257.76	396/320.35/403.57	304.14	396	0.37964	3502.7	1952.9	2.0785	0.98117	0.018831	0.037663	0.53225	TRUE
hsLibDrugV1Nik_07501	CREG1	725.88/671.48/592.95	810.21/878.27/640.26	671.48	810.21	0.27058	4563.6	4456.6	2.078	0.98115	0.018852	0.037705	0.53225	TRUE
hsLibDrugV1Nik_19672	NTN3	335.5/322.9/428.66	441.06/432.15/392.45	335.5	432.15	0.36424	4418.6	2163.1	2.078	0.98114	0.018857	0.037714	0.53225	TRUE
hsLibDrugV1Nik_05863	PCSK9	315.83/349.57/296.47	409.42/309.6/416.72	315.83	409.42	0.3734	756.44	2031.2	2.0767	0.98108	0.018915	0.037831	0.53282	TRUE
hsLibDrugV1Nik_01540	BDKRB1	212.28/193.55/175.62	249.3/273.05/266.02	193.55	266.02	0.45682	336.13	1219.7	2.0751	0.98101	0.018988	0.037977	0.53282	TRUE
hsLibDrugV1Nik_25957	KCNG4	104.59/132.32/157.68	191.77/227.9/154.75	132.32	191.77	0.53194	706.15	820.82	2.0748	0.981	0.019001	0.038003	0.53282	TRUE
hsLibDrugV1Nik_05394	OLFML1	376.92/374.25/421.11	433.39/498.79/479.43	376.92	479.43	0.34625	979.71	2442	2.0745	0.98098	0.019017	0.038035	0.53282	TRUE
hsLibDrugV1Nik_25785	CDK5	442.16/565.82/503.25	701.86/622.42/605.87	503.25	622.42	0.30606	3823.9	3300	2.0745	0.98098	0.019019	0.038037	0.53282	TRUE
hsLibDrugV1Nik_19306	JAK2	610.94/680.37/693.03	819.8/668.64/865.81	680.37	819.8	0.26859	2490.2	4518.1	2.0743	0.98097	0.019026	0.038052	0.53282	TRUE
hsLibDrugV1Nik_16268	FBLN2	334.47/429.55/338.96	492.84/385.92/435.94	338.96	435.94	0.36207	4113.4	2186.4	2.074	0.98096	0.019037	0.038075	0.53282	TRUE
hsLibDrugV1Nik_26081	VRK1	401.77/403.88/563.68	510.1/567.59/404.59	403.88	510.1	0.33611	12770	2624.2	2.0735	0.98094	0.019063	0.038125	0.53282	TRUE
hsLibDrugV1Nik_18261	KCNK9	627.51/576.69/734.58	784.32/761.09/663.52	627.51	761.09	0.27803	7023	4153	2.0728	0.98091	0.019094	0.038189	0.53282	TRUE
hsLibDrugV1Nik_10147	KAT2B	251.63/212.31/179.4	266.55/303.15/288.27	212.31	288.27	0.43947	1314.6	1343	2.0727	0.9809	0.019099	0.038197	0.53282	TRUE
hsLibDrugV1Nik_17417	FCGR3B	536.39/730.73/582.56	812.13/492.34/711.06	582.56	711.06	0.28711	12043	3843.5	2.0727	0.9809	0.019101	0.038201	0.53282	TRUE
hsLibDrugV1Nik_02068	PDE6H	340.68/411.78/353.13	467.91/420.32/452.13	353.13	452.13	0.35565	1797.5	2281.6	2.0726	0.9809	0.019105	0.038209	0.53282	TRUE
hsLibDrugV1Nik_15935	TESK2	257.84/331.79/249.26	318.33/341.85/345.92	257.84	341.85	0.40551	2771.3	1644.3	2.0717	0.98085	0.019146	0.038292	0.53282	TRUE
hsLibDrugV1Nik_22762	DCK	406.95/549.04/504.19	623.24/672.94/524.95	504.19	623.24	0.30526	5733.6	3306.5	2.0703	0.98079	0.019214	0.038428	0.53322	TRUE
hsLibDrugV1Nik_11663	GPR3	417.31/430.54/510.8	717.2/497.72/540.12	430.54	540.12	0.32646	3308.8	2804.9	2.0691	0.98073	0.019267	0.038534	0.5344	TRUE
hsLibDrugV1Nik_20650	YWHAG	374.85/405.85/484.37	512.01/598.77/507.76	405.85	512.01	0.33449	3562.8	2637.5	2.0671	0.98064	0.019361	0.038722	0.53526	TRUE
hsLibDrugV1Nik_24025	CCRL2	834.61/705.06/664.71	702.82/856.77/846.6	705.06	846.6	0.26359	9206.2	4689	2.067	0.98063	0.019368	0.038736	0.53526	TRUE
hsLibDrugV1Nik_11079	STK32A	398.67/417.7/501.36	525.44/475.15/527.99	417.7	525.44	0.33034	3680.7	2717.8	2.0666	0.98061	0.019388	0.038775	0.53526	TRUE
hsLibDrugV1Nik_02176	HSPG2	243.34/280.44/211.5	223.41/324.65/407.62	243.34	324.65	0.41441	1195.3	1548.1	2.0664	0.9806	0.019395	0.038791	0.53526	TRUE
hsLibDrugV1Nik_21227	ABCC5	569.52/566.81/583.51	696.11/557.92/755.57	569.52	696.11	0.2891	101.43	3753.9	2.066	0.98059	0.019413	0.038825	0.53526	TRUE
hsLibDrugV1Nik_01996	ATP2C1	275.44/252.79/304.97	239.71/395.6/362.1	275.44	362.1	0.39341	692.47	1761.4	2.0649	0.98053	0.019465	0.03893	0.53526	TRUE
hsLibDrugV1Nik_03419	INSL4	179.14/217.24/215.27	291.48/262.3/301.42	215.27	291.48	0.4355	654.73	1362.6	2.0646	0.98052	0.019482	0.038965	0.53526	TRUE
hsLibDrugV1Nik_25945	UTS2B	481.51/589.52/531.58	647.21/653.59/736.35	531.58	653.59	0.29761	2932.4	3493.7	2.0643	0.98051	0.019494	0.038987	0.53526	TRUE
hsLibDrugV1Nik_20574	CD52	605.77/742.58/631.66	765.14/576.19/781.86	631.66	765.14	0.27619	6487.1	4181.6	2.0643	0.9805	0.019497	0.038994	0.53526	TRUE
hsLibDrugV1Nik_02297	AQP1	783.87/786.03/832.77	1050.9/826.67/935.61	786.03	935.61	0.25102	1094.6	5251.4	2.0641	0.98049	0.019506	0.039012	0.53526	TRUE
hsLibDrugV1Nik_08634	SSTR1	405.92/412.76/475.87	519.68/435.37/523.94	412.76	519.68	0.3316	2014.5	2684.4	2.0637	0.98048	0.019525	0.03905	0.53526	TRUE
hsLibDrugV1Nik_15836	PLAA	454.58/382.15/356.9	563.79/484.82/384.36	382.15	484.82	0.3425	2941.9	2477.3	2.0627	0.98043	0.019569	0.039139	0.53526	TRUE
hsLibDrugV1Nik_05994	METAP2	550.89/651.73/452.26	837.06/675.09/437.96	550.89	675.09	0.29285	9948.3	3626	2.0627	0.98043	0.019571	0.039142	0.53526	TRUE
hsLibDrugV1Nik_02618	THSD1	269.23/282.42/212.44	164.92/354.75/371.21	269.23	354.75	0.39666	1699.4	1720	2.062	0.9804	0.019604	0.039209	0.53526	TRUE
hsLibDrugV1Nik_18196	SFRP2	273.37/345.62/272.87	359.56/390.22/350.98	273.37	359.56	0.39411	2609.8	1747.6	2.0617	0.98038	0.019617	0.039233	0.53526	TRUE
hsLibDrugV1Nik_07641	PSCA	122.19/173.8/283.26	266.55/241.87/201.28	173.8	241.87	0.47453	7322.3	1090.3	2.0617	0.98038	0.019619	0.039239	0.53526	TRUE
hsLibDrugV1Nik_22852	S100A12	201.92/334.75/257.76	341.34/211.77/403.57	257.76	341.34	0.40381	4522.9	1643.8	2.0615	0.98037	0.019628	0.039256	0.53526	TRUE
hsLibDrugV1Nik_21558	ATP2A3	517.75/585.57/520.25	579.13/640.69/670.6	520.25	640.69	0.29992	2137	3416.2	2.0608	0.98034	0.019663	0.039326	0.53546	TRUE
hsLibDrugV1Nik_13276	APOM	207.1/233.04/186	363.4/281.65/263.99	207.1	281.65	0.44173	559.07	1308.7	2.0607	0.98033	0.019668	0.039336	0.53546	TRUE
hsLibDrugV1Nik_04360	OR1D2	251.63/172.81/216.22	292.44/185.97/337.83	216.22	292.44	0.43393	1569.1	1368.8	2.0603	0.98031	0.019687	0.039374	0.53556	TRUE
hsLibDrugV1Nik_16447	FCGRT	166.72/204.41/135.02	162.04/233.27/252.87	166.72	233.27	0.48217	1212.7	1044.1	2.0598	0.98029	0.019709	0.039418	0.53574	TRUE
hsLibDrugV1Nik_08025	CYP27A1	227.81/414.74/361.62	464.07/307.45/461.23	361.62	461.23	0.35014	10364	2338.8	2.0596	0.98028	0.019718	0.039436	0.53574	TRUE
hsLibDrugV1Nik_20294	S100A7	465.97/604.34/610.89	734.46/577.27/767.7	604.34	734.46	0.28092	9593.3	3993.3	2.0592	0.98026	0.019737	0.039474	0.53588	TRUE
hsLibDrugV1Nik_02931	NISCH	635.8/501.64/519.3	639.54/468.7/641.27	519.3	639.54	0.29994	6941.5	3409.7	2.0591	0.98026	0.019742	0.039485	0.53588	TRUE
hsLibDrugV1Nik_16838	CLU	254.73/281.43/281.37	498.59/368.72/312.54	281.37	368.72	0.38887	354.7	1800.9	2.0585	0.98023	0.019772	0.039545	0.5364	TRUE
hsLibDrugV1Nik_16747	SELPLG	708.28/599.4/591.06	559.96/728.84/799.06	599.4	728.84	0.28167	5962.5	3959.3	2.0572	0.98017	0.019834	0.039668	0.5364	TRUE
hsLibDrugV1Nik_09885	CNGA4	192.6/235.02/267.2	314.5/284.87/333.78	235.02	314.5	0.41872	1417.5	1493	2.0569	0.98015	0.019849	0.039698	0.5364	TRUE
hsLibDrugV1Nik_14931	SEMA4B	297.19/305.13/289.86	428.6/387/276.13	297.19	387	0.37982	58.353	1906.4	2.0569	0.98015	0.01985	0.0397	0.5364	TRUE
hsLibDrugV1Nik_07214	TLL1	714.49/671.48/867.71	856.23/966.42/769.73	714.49	856.23	0.26075	12662	4754.4	2.0556	0.98009	0.01991	0.039819	0.5374	TRUE
hsLibDrugV1Nik_24674	PIK3R1	676.18/678.4/858.26	892.67/769.69/816.25	678.4	816.25	0.26653	16179	4504.4	2.054	0.98001	0.019986	0.039971	0.53846	TRUE
hsLibDrugV1Nik_13339	FLT1	342.75/183.67/198.28	342.3/270.9/225.56	198.28	270.9	0.44827	10543	1250.7	2.0534	0.97998	0.020019	0.040039	0.5391	TRUE
hsLibDrugV1Nik_12455	KCNC4	196.74/160.96/246.43	307.78/230.05/269.05	196.74	269.05	0.44959	1874.7	1240.7	2.0528	0.97995	0.020047	0.040094	0.53921	TRUE
hsLibDrugV1Nik_00550	GABBR2	357.25/425.6/366.34	430.51/511.69/466.29	366.34	466.29	0.34717	1797.2	2370.6	2.0527	0.97995	0.020053	0.040106	0.53921	TRUE
hsLibDrugV1Nik_22747	CCL2	1013.8/1129.7/984.78	1185.1/1183.6/1098.5	1013.8	1183.6	0.22323	7138.2	6845.5	2.0524	0.97993	0.020065	0.04013	0.53927	TRUE
hsLibDrugV1Nik_17280	CRTAC1	450.44/639.88/487.2	603.1/473/637.22	487.2	603.1	0.30732	12332	3190.4	2.052	0.97991	0.020086	0.040172	0.53956	TRUE
hsLibDrugV1Nik_00023	ADH4	388.31/588.54/355.01	415.17/491.27/561.36	388.31	491.27	0.33852	20599	2518.9	2.0514	0.97989	0.020113	0.040226	0.53993	TRUE
hsLibDrugV1Nik_25768	PSMA5	504.29/555.95/514.58	633.79/539.64/649.36	514.58	633.79	0.30007	908.64	3377.4	2.0512	0.97987	0.020126	0.040252	0.53993	TRUE
hsLibDrugV1Nik_18953	KCNMA1	365.53/361.42/450.38	341.34/557.92/465.27	365.53	465.27	0.34724	3607.8	2365.2	2.0509	0.97986	0.020136	0.040272	0.53993	TRUE
hsLibDrugV1Nik_21354	SVOP	309.61/184.66/260.59	344.22/359.05/315.58	260.59	344.22	0.40018	4084.6	1662.6	2.0509	0.97986	0.02014	0.040279	0.53993	TRUE
hsLibDrugV1Nik_19607	HIST1H4A	346.89/96.773/150.13	212.86/144.05/213.42	150.13	212.86	0.50092	20782	936.14	2.0504	0.97984	0.020163	0.040327	0.54015	TRUE
hsLibDrugV1Nik_04233	FGF12	1271.6/1106/1146.2	1337.6/1173.9/1327	1146.2	1327	0.21113	8667.3	7780.1	2.0498	0.97981	0.020192	0.040383	0.54038	TRUE
hsLibDrugV1Nik_07899	CASP2	1004.4/946/907.36	1176.5/871.82/1109.6	946	1109.6	0.22987	2453.7	6369.4	2.0496	0.9798	0.020202	0.040403	0.54038	TRUE
hsLibDrugV1Nik_27017	NonTargetingGuide711	1924/1492.1/1557.9	1770/1852.2/1629.5	1557.9	1770	0.18403	69163	10712	2.0492	0.97978	0.020219	0.040438	0.54047	TRUE
hsLibDrugV1Nik_16181	NOD1	244.38/287.36/293.64	379.7/285.95/375.25	287.36	375.25	0.38386	943.3	1840.8	2.0487	0.97975	0.020246	0.040491	0.54077	TRUE
hsLibDrugV1Nik_01160	RHAG	654.43/952.91/724.19	944.45/866.44/825.36	724.19	866.44	0.25841	28590	4821.6	2.0486	0.97975	0.02025	0.0405	0.54077	TRUE
hsLibDrugV1Nik_20872	ALB	479.44/484.85/656.21	600.23/478.37/606.88	484.85	600.23	0.3074	14696	3174.4	2.0478	0.97971	0.020291	0.040582	0.54108	TRUE
hsLibDrugV1Nik_15384	CD36	237.13/209.34/192.61	283.81/291.32/180.04	209.34	283.81	0.43726	525.95	1323.5	2.0469	0.97967	0.020332	0.040664	0.54152	TRUE
hsLibDrugV1Nik_03585	MARK3	450.44/573.72/507.97	626.11/542.87/700.95	507.97	626.11	0.30114	3816.5	3332.3	2.0466	0.97965	0.020347	0.040694	0.54152	TRUE
hsLibDrugV1Nik_09838	KRT18	144.97/159.97/281.37	254.09/224.67/207.35	159.97	224.67	0.48743	7481	1000.2	2.0459	0.97962	0.020384	0.040768	0.54199	TRUE
hsLibDrugV1Nik_01081	MCOLN2	472.19/584.59/508.92	709.53/513.84/627.11	508.92	627.11	0.30076	3537.5	3338.7	2.0455	0.9796	0.020402	0.040804	0.54199	TRUE
hsLibDrugV1Nik_22206	SMS	1217.7/1492.1/1004.6	1157.3/1453.4/1403.9	1217.7	1403.9	0.20509	60341	8286.5	2.0451	0.97958	0.020421	0.040842	0.54199	TRUE
hsLibDrugV1Nik_20367	LRRTM3	401.77/312.04/322.91	416.13/431.07/349.97	322.91	416.13	0.3649	3168.7	2078.6	2.0447	0.97956	0.020444	0.040888	0.54199	TRUE
hsLibDrugV1Nik_08651	MAP3K14	237.13/210.33/141.63	346.14/284.87/281.19	210.33	284.87	0.43586	2719.2	1330	2.0439	0.97952	0.020482	0.040964	0.54199	TRUE
hsLibDrugV1Nik_11077	HKDC1	1678.5/2217.9/1548.5	2005.9/1898.4/1805.5	1678.5	1898.4	0.1775	153900	11578	2.0436	0.9795	0.020497	0.040994	0.54205	TRUE
hsLibDrugV1Nik_17570	EPHA6	719.67/878.85/770.45	953.07/916.97/767.7	770.45	916.97	0.25086	7164.6	5143	2.043	0.97947	0.020528	0.041055	0.54232	TRUE
hsLibDrugV1Nik_01647	FMO3	315.83/260.69/248.32	275.18/344/375.25	260.69	344	0.3987	1596.4	1663.2	2.0426	0.97945	0.020546	0.041093	0.54232	TRUE
hsLibDrugV1Nik_04030	CCNB1	3.1065/0/3.7767	0.95883/11.825/13.149	3.1065	11.825	1.643	5.0498	16.541	2.1436	0.97938	0.020618	0.041236	0.54262	TRUE
hsLibDrugV1Nik_24952	ADM	507.39/466.09/484.37	599.27/750.34/544.17	484.37	599.27	0.30653	432.18	3171.1	2.0404	0.97935	0.020655	0.04131	0.54278	TRUE
hsLibDrugV1Nik_16854	MMP1	637.87/556.94/495.7	668.3/680.47/725.22	556.94	680.47	0.28855	5150	3667.6	2.0398	0.97932	0.020684	0.041369	0.54278	TRUE
hsLibDrugV1Nik_18473	SLC1A1	277.51/184.66/203.94	340.38/250.47/277.14	203.94	277.14	0.44059	2892.2	1288	2.0396	0.9793	0.020696	0.041391	0.54278	TRUE
hsLibDrugV1Nik_00640	DLL4	720.71/1022/836.55	868.7/1023.4/989.21	836.55	989.21	0.24157	23913	5603.5	2.0395	0.9793	0.020703	0.041405	0.54278	TRUE
hsLibDrugV1Nik_15479	BDNF	162.57/135.28/203	257.92/221.45/227.58	162.57	227.58	0.48276	1189.5	1017.1	2.0383	0.97924	0.020759	0.041517	0.54278	TRUE
hsLibDrugV1Nik_14980	MFGE8	405.92/546.07/458.87	512.97/571.89/570.47	458.87	570.47	0.31343	5204.2	2997.4	2.0383	0.97924	0.020761	0.041523	0.54278	TRUE
hsLibDrugV1Nik_15069	GYPB	264.05/417.7/308.75	430.51/383.77/399.53	308.75	399.53	0.37081	6934.4	1983.8	2.0382	0.97924	0.020764	0.041529	0.54278	TRUE
hsLibDrugV1Nik_17534	GUCY1A3	160.5/325.87/188.84	312.58/259.07/176	188.84	259.07	0.45415	9790	1188.8	2.0371	0.97918	0.020821	0.041643	0.54325	TRUE
hsLibDrugV1Nik_03010	CLCA2	247.48/310.07/284.2	371.07/403.12/357.05	284.2	371.07	0.38359	1008.6	1819.7	2.0363	0.97914	0.020858	0.041717	0.54325	TRUE
hsLibDrugV1Nik_04009	EXTL2	1040.7/1129.7/1150	1332.8/1155.6/1307.8	1129.7	1307.8	0.21109	4167.1	7663	2.0351	0.97908	0.020918	0.041837	0.54325	TRUE
hsLibDrugV1Nik_24537	DDOST	241.27/330.8/277.59	419.97/363.35/290.29	277.59	363.35	0.38717	2075.4	1775.7	2.0351	0.97908	0.020921	0.041843	0.54325	TRUE
hsLibDrugV1Nik_12837	TNFSF15	169.82/154.05/122.74	253.13/217.15/216.45	154.05	217.15	0.49261	614.35	961.61	2.0349	0.97907	0.020931	0.041862	0.54325	TRUE
hsLibDrugV1Nik_09951	CYP4B1	4.142/14.812/2.8326	20.135/7.5249/14.161	4.142	14.161	1.5599	57.783	22.311	2.121	0.97906	0.020945	0.041889	0.54325	TRUE
hsLibDrugV1Nik_13741	ST14	4.142/0/15.107	26.847/13.975/14.161	4.142	14.161	1.5599	68.693	22.311	2.121	0.97906	0.020945	0.041889	0.54325	TRUE
hsLibDrugV1Nik_14282	PRKG1	193.64/255.76/199.22	271.35/262.3/356.04	199.22	271.35	0.44385	1613.6	1256.9	2.0344	0.97904	0.020957	0.041915	0.54325	TRUE
hsLibDrugV1Nik_05055	OPCML	660.65/675.43/798.78	836.1/811.62/723.2	675.43	811.62	0.26463	7716.5	4483.9	2.0337	0.97901	0.020989	0.041978	0.54372	TRUE
hsLibDrugV1Nik_20788	AMHR2	0/0/0	5.753/20.425/0	0.94418	5.753	1.7964	0	4.7947	2.1961	0.97894	0.021057	0.042115	0.54446	TRUE
hsLibDrugV1Nik_02629	CNMD	0/13.825/0	5.753/8.5999/0	0.94418	5.753	1.7964	95.561	4.7947	2.1961	0.97894	0.021057	0.042115	0.54446	TRUE
hsLibDrugV1Nik_25258	FXYD2	0/0/6.6093	5.753/0/12.138	0.94418	5.753	1.7964	21.841	4.7947	2.1961	0.97894	0.021057	0.042115	0.54446	TRUE
hsLibDrugV1Nik_27120	NonTargetingGuide814	0/0/0	5.753/0/10.115	0.94418	5.753	1.7964	0	4.7947	2.1961	0.97894	0.021057	0.042115	0.54446	TRUE
hsLibDrugV1Nik_26100	MYLK3	1.0355/6.9123/0	0/23.65/6.0688	1.0355	6.0688	1.7961	17.805	5.2777	2.1909	0.97889	0.021112	0.042224	0.54447	TRUE
hsLibDrugV1Nik_22880	PSMB6	163.61/89.86/240.77	302.99/172/228.59	163.61	228.59	0.48003	5696.1	1023.9	2.0308	0.97886	0.021135	0.04227	0.54447	TRUE
hsLibDrugV1Nik_09610	CDCP1	377.96/444.36/352.18	478.46/456.87/512.81	377.96	478.46	0.33936	2537.2	2449	2.0308	0.97886	0.021138	0.042276	0.54447	TRUE
hsLibDrugV1Nik_03043	ADA	970.26/888.73/941.35	1105.5/1102.9/1055	941.35	1102.9	0.22832	1802.5	6336.8	2.0299	0.97882	0.021184	0.042369	0.54472	TRUE
hsLibDrugV1Nik_09641	HTR1B	350/237.98/288.92	388.33/376.25/254.89	288.92	376.25	0.37985	3162.6	1851.2	2.0296	0.9788	0.021198	0.042397	0.54472	TRUE
hsLibDrugV1Nik_03710	CELA2B	360.35/413.75/335.19	458.32/478.37/377.28	360.35	458.32	0.34609	1742.4	2330.3	2.0294	0.97879	0.021207	0.042415	0.54472	TRUE
hsLibDrugV1Nik_04296	LTF	443.19/442.39/453.21	552.28/568.67/403.57	443.19	552.28	0.31683	50.477	2890.8	2.029	0.97877	0.021229	0.042459	0.54502	TRUE
hsLibDrugV1Nik_04949	ARSG	328.25/394.99/434.32	524.48/497.72/422.79	394.99	497.72	0.33276	3000.5	2564	2.0288	0.97876	0.021241	0.042482	0.54506	TRUE
hsLibDrugV1Nik_20748	IFNA10	952.66/1114.9/817.66	1115.1/1068.5/1240.1	952.66	1115.1	0.22694	22266	6416.1	2.0282	0.97873	0.021271	0.042542	0.54542	TRUE
hsLibDrugV1Nik_15329	SIK3	449.41/360.43/259.65	458.32/465.47/344.91	360.43	458.32	0.34579	9036.6	2330.8	2.0276	0.9787	0.021298	0.042596	0.54542	TRUE
hsLibDrugV1Nik_01663	WNT2B	682.39/615.2/657.15	838.97/672.94/790.97	657.15	790.97	0.26702	1198.7	4357.6	2.0271	0.97867	0.021325	0.04265	0.54542	TRUE
hsLibDrugV1Nik_05813	ULBP2	386.24/256.74/297.42	447.77/385.92/318.61	297.42	385.92	0.3747	4771.9	1908	2.0261	0.97862	0.021375	0.04275	0.54601	TRUE
hsLibDrugV1Nik_13111	KDM4C	13.461/6.9123/33.991	60.406/6.4499/31.355	13.461	31.355	1.1618	232.17	76.042	2.052	0.9786	0.021397	0.042793	0.54601	TRUE
hsLibDrugV1Nik_26122	MUC2	270.27/301.18/328.58	390.24/431.07/318.61	301.18	390.24	0.37266	853.14	1933.1	2.0257	0.9786	0.0214	0.0428	0.54601	TRUE
hsLibDrugV1Nik_18733	SERPINB6	67.307/82.948/108.58	67.118/140.82/128.46	82.948	128.46	0.6249	450.85	504.72	2.0256	0.9786	0.021403	0.042806	0.54601	TRUE
hsLibDrugV1Nik_19174	TAS1R2	666.86/677.41/569.34	801.58/729.92/821.31	666.86	801.58	0.2651	4810.5	4424.6	2.0253	0.97858	0.021418	0.042836	0.54601	TRUE
hsLibDrugV1Nik_01867	PLA2G10	271.3/291.31/355.01	378.74/390.22/350.98	291.31	378.74	0.37752	2229.5	1867.2	2.0234	0.97848	0.021517	0.043034	0.54762	TRUE
hsLibDrugV1Nik_18610	SCT	210.21/185.65/175.62	198.48/254.77/279.16	185.65	254.77	0.45456	351.89	1167.9	2.0228	0.97845	0.021547	0.043094	0.54762	TRUE
hsLibDrugV1Nik_10932	CXCL5	5.1775/1.975/9.4418	16.3/0/33.378	5.1775	16.3	1.4857	14.22	28.14	2.0968	0.97845	0.021554	0.043108	0.54762	TRUE
hsLibDrugV1Nik_12074	MMP11	270.27/400.92/375.79	475.58/483.75/442.01	375.79	475.58	0.33897	5883	2434.3	2.0226	0.97844	0.021557	0.043113	0.54762	TRUE
hsLibDrugV1Nik_23395	TYR	194.67/149.11/209.61	175.47/265.52/305.46	194.67	265.52	0.44581	1149.6	1227.1	2.0225	0.97844	0.02156	0.043121	0.54762	TRUE
hsLibDrugV1Nik_03533	KEAP1	341.71/436.46/373.9	528.31/432.15/473.37	373.9	473.37	0.33951	2475.2	2421.6	2.0213	0.97838	0.021623	0.043245	0.54762	TRUE
hsLibDrugV1Nik_17821	TIMP2	284.76/347.59/235.1	371.07/417.1/282.2	284.76	371.07	0.38075	3206.8	1823.5	2.0211	0.97836	0.021636	0.043273	0.54762	TRUE
hsLibDrugV1Nik_26888	NonTargetingGuide582	371.74/304.14/282.31	416.13/393.45/362.1	304.14	393.45	0.37034	2523.3	1952.9	2.0208	0.97835	0.02165	0.0433	0.54762	TRUE
hsLibDrugV1Nik_03649	HSD17B10	580.91/650.75/480.59	660.63/753.57/706	580.91	706	0.28091	7470.8	3832.2	2.0207	0.97834	0.021657	0.043315	0.54762	TRUE
hsLibDrugV1Nik_15883	TUBB	391.42/416.71/439.05	411.34/558.99/521.92	416.71	521.92	0.32406	569.29	2711.1	2.0205	0.97833	0.021668	0.043337	0.54762	TRUE
hsLibDrugV1Nik_24770	MTNR1B	501.18/487.81/595.78	521.6/665.42/616.99	501.18	616.99	0.29939	4563.9	3285.9	2.0204	0.97833	0.021672	0.043344	0.54762	TRUE
hsLibDrugV1Nik_07906	REG1A	800.44/723.82/804.45	926.23/948.14/965.95	800.44	948.14	0.24403	2943.4	5351.7	2.019	0.97826	0.021744	0.043488	0.54819	TRUE
hsLibDrugV1Nik_23804	IL20RB	797.33/791.96/1002.7	928.15/1041.7/944.71	797.33	944.71	0.2444	21107	5330.1	2.0186	0.97824	0.021763	0.043525	0.54838	TRUE
hsLibDrugV1Nik_00764	SLC6A7	478.4/389.07/391.84	456.4/499.87/493.6	391.84	493.6	0.33232	3750.5	2542.7	2.018	0.9782	0.021795	0.043591	0.54845	TRUE
hsLibDrugV1Nik_00088	CD300LF	569.52/489.79/477.76	604.06/690.14/590.7	489.79	604.06	0.30198	3251.3	3208.1	2.0175	0.97818	0.02182	0.043639	0.54855	TRUE
hsLibDrugV1Nik_21290	NEU1	200.89/451.28/321.02	518.73/270.9/412.68	321.02	412.68	0.36135	15699	2066	2.0165	0.97813	0.021874	0.043749	0.54905	TRUE
hsLibDrugV1Nik_06798	EMC10	43.491/0/1.8884	8.6295/41.925/0	1.8884	8.6295	1.7372	867.17	9.8571	2.1471	0.97812	0.021883	0.043765	0.54905	TRUE
hsLibDrugV1Nik_26344	NonTargetingGuide038	716.56/620.13/577.84	559/749.27/750.51	620.13	749.27	0.2725	5543.8	4102.1	2.0162	0.97811	0.02189	0.04378	0.54905	TRUE
hsLibDrugV1Nik_04036	ABCB7	201.92/219.22/248.32	343.26/263.37/294.34	219.22	294.34	0.42342	573.03	1388.6	2.0158	0.97809	0.02191	0.043821	0.54931	TRUE
hsLibDrugV1Nik_18758	PTPN11	424.55/434.49/580.67	541.74/428.92/544.17	434.49	541.74	0.31762	10734	2831.7	2.0154	0.97807	0.02193	0.043859	0.54954	TRUE
hsLibDrugV1Nik_20185	COL5A1	676.18/635.93/633.55	586.8/794.42/766.69	635.93	766.69	0.26938	812.72	4211.1	2.015	0.97805	0.021954	0.043908	0.54959	TRUE
hsLibDrugV1Nik_07886	NOD2	561.24/573.72/507.03	767.06/567.59/683.75	561.24	683.75	0.28439	1547.4	3697.1	2.0149	0.97804	0.02196	0.043919	0.54959	TRUE
hsLibDrugV1Nik_23720	EP300	510.5/571.75/457.93	589.68/653.59/627.11	510.5	627.11	0.29628	3257.5	3349.6	2.0148	0.97804	0.021962	0.043924	0.54959	TRUE
hsLibDrugV1Nik_11993	LAMA4	304.44/342.65/278.53	320.25/436.45/393.46	304.44	393.46	0.36901	1065.7	1954.9	2.0135	0.97797	0.022033	0.044066	0.54986	TRUE
hsLibDrugV1Nik_03692	TRGV3	522.93/470.04/421.11	625.16/390.22/581.59	470.04	581.59	0.30664	2595.8	3073.4	2.0122	0.9779	0.022099	0.044197	0.55043	TRUE
hsLibDrugV1Nik_18226	TAB1	481.51/460.16/349.35	366.27/579.42/570.47	460.16	570.47	0.30939	6367.8	3006.2	2.0118	0.97788	0.022122	0.044244	0.55057	TRUE
hsLibDrugV1Nik_19002	GABRA4	718.64/545.09/543.85	665.43/425.7/737.36	545.09	665.43	0.28732	15060	3586.3	2.0095	0.97776	0.022242	0.044485	0.55239	TRUE
hsLibDrugV1Nik_16058	HIST1H3E	163.61/253.78/130.3	150.54/227.9/280.18	163.61	227.9	0.47566	4620.4	1023.9	2.0092	0.97774	0.022259	0.044519	0.55239	TRUE
hsLibDrugV1Nik_00533	KLHL17	2.071/0/10.386	0/27.95/9.1032	2.071	9.1032	1.718	36.714	10.85	2.1349	0.97771	0.022286	0.044573	0.55239	TRUE
hsLibDrugV1Nik_23325	SDR42E2	591.27/501.64/510.8	627.07/661.12/477.41	510.8	627.07	0.29534	3279.4	3351.6	2.0083	0.9777	0.022303	0.044607	0.55239	TRUE
hsLibDrugV1Nik_22900	CYP2S1	229.88/137.26/152.01	213.82/155.87/283.21	152.01	213.82	0.48946	3140.5	948.4	2.0069	0.97762	0.02238	0.04476	0.55239	TRUE
hsLibDrugV1Nik_19963	ADRA2B	19.674/0/1.8884	20.135/8.5999/1.0115	1.8884	8.5999	1.7328	159.96	9.8571	2.1377	0.9776	0.022403	0.044807	0.55239	TRUE
hsLibDrugV1Nik_25454	HRH2	16.568/0/1.8884	0/8.5999/9.1032	1.8884	8.5999	1.7328	109.53	9.8571	2.1377	0.9776	0.022403	0.044807	0.55239	TRUE
hsLibDrugV1Nik_07283	PSKH1	323.08/377.22/410.72	524.48/314.97/476.4	377.22	476.4	0.33599	2026.9	2444	2.0063	0.97759	0.022412	0.044824	0.55239	TRUE
hsLibDrugV1Nik_24001	KCND3	610.94/671.48/836.55	805.42/877.19/690.83	671.48	805.42	0.26202	15456	4456.6	2.0062	0.97758	0.022416	0.044831	0.55239	TRUE
hsLibDrugV1Nik_14696	COL11A2	177.07/135.28/171.84	278.06/220.37/237.69	171.84	237.69	0.46571	681.89	1077.6	2.0061	0.97758	0.022423	0.044845	0.55239	TRUE
hsLibDrugV1Nik_04235	FGF12	900.88/722.83/672.26	861.99/859.99/905.26	722.83	861.99	0.25368	17130	4812.2	2.006	0.97757	0.02243	0.04486	0.55239	TRUE
hsLibDrugV1Nik_17946	ACKR4	387.28/341.67/370.12	386.41/468.7/468.31	370.12	468.31	0.33865	551.97	2396.1	2.0059	0.97757	0.022434	0.044868	0.55239	TRUE
hsLibDrugV1Nik_11915	CYP4F22	795.26/655.68/623.16	742.13/825.59/787.93	655.68	787.93	0.2647	10270	4347.4	2.0057	0.97756	0.022442	0.044884	0.55239	TRUE
hsLibDrugV1Nik_18193	GP1BA	9.3195/0/5.6651	24.93/17.2/5.0573	5.6651	17.2	1.4492	22.724	30.901	2.075	0.97755	0.022453	0.044906	0.55239	TRUE
hsLibDrugV1Nik_26675	NonTargetingGuide369	330.32/315.99/388.06	422.84/381.62/574.51	330.32	422.84	0.35529	1769.4	2128.4	2.0054	0.97754	0.022458	0.044916	0.55239	TRUE
hsLibDrugV1Nik_03915	C6orf15	166.72/244.89/222.83	298.2/273.05/383.35	222.83	298.2	0.4187	1817.8	1412.4	2.0054	0.97754	0.022459	0.044919	0.55239	TRUE
hsLibDrugV1Nik_18549	TMPRSS11E	358.28/306.12/254.93	395.04/338.62/411.67	306.12	395.04	0.36684	2670.7	1966.1	2.0053	0.97754	0.022463	0.044926	0.55239	TRUE
hsLibDrugV1Nik_22367	GPR37	9.3195/29.624/16.051	38.353/0/35.401	16.051	35.401	1.0941	114.77	91.321	2.0249	0.97751	0.022486	0.044971	0.55239	TRUE
hsLibDrugV1Nik_04197	BTN1A1	284.76/294.27/289.86	403.67/321.42/376.27	289.86	376.27	0.37523	22.712	1857.5	2.0047	0.9775	0.022498	0.044996	0.55239	TRUE
hsLibDrugV1Nik_06556	SRPK2	6.213/3.9499/5.6651	26.847/0/17.195	5.6651	17.195	1.4488	1.6211	30.901	2.0741	0.9775	0.022501	0.045003	0.55239	TRUE
hsLibDrugV1Nik_05544	OXTR	368.64/282.42/236.05	432.43/367.65/310.52	282.42	367.65	0.37931	4792.1	1807.9	2.0045	0.97749	0.02251	0.045019	0.55239	TRUE
hsLibDrugV1Nik_12691	MYT1	730.03/680.37/719.47	858.15/967.49/797.04	719.47	858.15	0.25398	820.05	4788.9	2.004	0.97747	0.022534	0.045067	0.55274	TRUE
hsLibDrugV1Nik_22325	TRBV7-1	579.88/665.56/563.68	703.78/736.37/637.22	579.88	703.78	0.27893	3801.7	3825.1	2.0033	0.97743	0.022571	0.045142	0.55313	TRUE
hsLibDrugV1Nik_20080	PKM	339.64/471.03/310.64	433.39/348.3/500.68	339.64	433.39	0.35073	9051.4	2190.9	2.0028	0.9774	0.022599	0.045197	0.55333	TRUE
hsLibDrugV1Nik_24848	NPPC	317.9/294.27/296.47	326.96/383.77/449.09	296.47	383.77	0.37124	231.93	1901.7	2.0019	0.97735	0.02265	0.045301	0.55435	TRUE
hsLibDrugV1Nik_11981	NEK4	439.05/501.64/419.22	388.33/546.09/559.34	439.05	546.09	0.31412	2155.2	2862.7	2.0007	0.97729	0.022714	0.045429	0.55481	TRUE
hsLibDrugV1Nik_15046	MCL1	308.58/285.38/283.26	419.01/370.87/316.59	285.38	370.87	0.37687	271.33	1827.6	1.9998	0.97724	0.022763	0.045527	0.55486	TRUE
hsLibDrugV1Nik_23356	RSPO3	636.83/509.54/491.92	625.16/467.62/690.83	509.54	625.16	0.2945	8257.1	3343	1.9997	0.97723	0.022767	0.045535	0.55486	TRUE
hsLibDrugV1Nik_01834	VIPR2	413.16/536.2/422.05	447.77/526.74/630.14	422.05	526.74	0.31901	6554.5	2747.3	1.9974	0.97711	0.02289	0.045779	0.55558	TRUE
hsLibDrugV1Nik_17179	ABCB6	828.4/728.76/742.13	920.47/882.57/851.65	742.13	882.57	0.24973	3810.6	4946.2	1.9969	0.97708	0.02292	0.04584	0.55558	TRUE
hsLibDrugV1Nik_16802	FKBP1C	11.39/6.9123/10.386	25.888/49.449/12.138	10.386	25.888	1.2397	6.5378	58.056	2.0346	0.97707	0.022929	0.045857	0.55558	TRUE
hsLibDrugV1Nik_05152	NPFFR1	357.25/308.09/406	415.17/536.42/453.14	357.25	453.14	0.34217	2396.5	2309.4	1.9954	0.977	0.023	0.046001	0.55558	TRUE
hsLibDrugV1Nik_12126	DAG1	166.72/264.64/185.06	253.13/275.2/222.52	185.06	253.13	0.4498	3335	1164	1.9952	0.97699	0.023013	0.046026	0.55558	TRUE
hsLibDrugV1Nik_19120	HYAL3	269.23/183.67/185.06	253.13/162.32/261.97	185.06	253.13	0.4498	3543.2	1164	1.9952	0.97699	0.023013	0.046026	0.55558	TRUE
hsLibDrugV1Nik_17288	NRG4	608.87/605.32/678.87	735.42/849.24/559.34	608.87	735.42	0.27202	2456	4024.5	1.9948	0.97697	0.023033	0.046066	0.55558	TRUE
hsLibDrugV1Nik_23746	CD1E	234.02/339.69/250.21	329.84/312.82/390.43	250.21	329.84	0.39723	4134.6	1593.6	1.9947	0.97696	0.02304	0.046079	0.55558	TRUE
hsLibDrugV1Nik_11729	CCL28	1133.9/1059.6/1204.8	1308.8/1357.7/1149	1133.9	1308.8	0.20682	5275	7692.7	1.9945	0.97695	0.023051	0.046102	0.55558	TRUE
hsLibDrugV1Nik_10470	TAPBPL	444.23/467.08/492.86	513.93/577.27/675.66	467.08	577.27	0.305	593.52	3053.3	1.9942	0.97694	0.023064	0.046129	0.55558	TRUE
hsLibDrugV1Nik_20328	PLXNB1	6.213/0/15.107	18.218/17.2/30.344	6.213	18.218	1.4138	58.852	34.016	2.0583	0.97691	0.023091	0.046183	0.55558	TRUE
hsLibDrugV1Nik_14247	TNK2	271.3/136.27/164.29	228.2/321.42/171.95	164.29	228.2	0.47163	6118.3	1028.3	1.9931	0.97688	0.023124	0.046249	0.55558	TRUE
hsLibDrugV1Nik_14880	TNFSF14	693.78/638.9/647.71	744.05/778.29/780.85	647.71	778.29	0.26459	1100.2	4292.3	1.9931	0.97688	0.023124	0.046248	0.55558	TRUE
hsLibDrugV1Nik_19530	CCL7	858.43/766.28/1035.8	1009.6/932.02/1083.3	858.43	1009.6	0.23383	19971	5756.3	1.9931	0.97688	0.023125	0.046249	0.55558	TRUE
hsLibDrugV1Nik_25004	ANPEP	692.75/502.63/568.4	690.36/535.34/718.14	568.4	690.36	0.27999	9894.5	3746.2	1.9926	0.97684	0.023155	0.046311	0.55558	TRUE
hsLibDrugV1Nik_00214	PTHLH	202.96/266.62/224.72	326/299.92/196.22	224.72	299.92	0.41488	1114.6	1424.9	1.9923	0.97683	0.023167	0.046335	0.55558	TRUE
hsLibDrugV1Nik_26102	MYLK3	814.94/913.42/902.64	1089.2/1057.8/1038.8	902.64	1057.8	0.22859	3904	6065.5	1.9921	0.97682	0.023179	0.046359	0.55558	TRUE
hsLibDrugV1Nik_23840	GP1BB	372.78/350.55/353.13	387.37/448.27/476.4	353.13	448.27	0.34333	196.45	2281.6	1.9919	0.97681	0.023191	0.046382	0.55558	TRUE
hsLibDrugV1Nik_20588	LCAT	284.76/283.41/368.23	280.94/369.8/371.21	284.76	369.8	0.37581	3484.5	1823.5	1.9913	0.97678	0.023223	0.046445	0.55558	TRUE
hsLibDrugV1Nik_17219	GALNS	209.17/245.88/272.87	403.67/324.65/287.26	245.88	324.65	0.39949	1038	1564.9	1.9911	0.97676	0.023237	0.046473	0.55558	TRUE
hsLibDrugV1Nik_11533	CDH3	217.45/149.11/235.1	191.77/311.75/291.3	217.45	291.3	0.42013	2491.3	1377	1.9901	0.97671	0.02329	0.04658	0.55558	TRUE
hsLibDrugV1Nik_25642	PTX3	5.1775/0/15.107	23.971/16.125/2.0229	5.1775	16.125	1.471	62.7	28.14	2.0637	0.97663	0.023367	0.046733	0.55566	TRUE
hsLibDrugV1Nik_03499	TARS	5.1775/2.9624/10.386	23.012/16.125/9.1032	5.1775	16.125	1.471	16.018	28.14	2.0637	0.97663	0.023367	0.046733	0.55566	TRUE
hsLibDrugV1Nik_17183	HPGDS	309.61/358.45/429.6	498.59/393.45/454.15	358.45	454.15	0.34053	3723.8	2317.5	1.9878	0.97658	0.023415	0.046831	0.55607	TRUE
hsLibDrugV1Nik_19264	HAGH	336.54/326.85/312.53	418.05/419.25/361.09	326.85	418.05	0.35406	149.54	2105.1	1.9876	0.97657	0.023427	0.046853	0.55607	TRUE
hsLibDrugV1Nik_26106	HIPK3	231.95/158.98/203	236.83/295.62/274.11	203	274.11	0.43143	1387.8	1281.8	1.9861	0.97649	0.023509	0.047018	0.55607	TRUE
hsLibDrugV1Nik_09282	AOC3	844.97/909.47/743.07	990.47/994.36/1056	844.97	994.36	0.23462	7271.2	5662.3	1.9854	0.97645	0.023549	0.047099	0.55607	TRUE
hsLibDrugV1Nik_09541	GYPE	504.29/281.43/313.47	341.34/470.85/402.56	313.47	402.56	0.35988	18719	2015.4	1.9846	0.97641	0.023594	0.047189	0.55607	TRUE
hsLibDrugV1Nik_08533	SLC12A9	664.79/552.99/761.96	773.77/796.57/954.82	664.79	796.57	0.26054	10971	4410.3	1.9843	0.97639	0.023612	0.047224	0.55607	TRUE
hsLibDrugV1Nik_08226	AREG	1016.9/982.54/1053.7	1181.3/1220.1/909.31	1016.9	1181.3	0.21603	1268	6867.3	1.984	0.97637	0.023625	0.04725	0.55607	TRUE
hsLibDrugV1Nik_12327	CSNK2A2	932.98/914.4/1046.2	1090.2/1113.7/982.13	932.98	1090.2	0.22443	6576.7	6278.1	1.984	0.97637	0.023627	0.047253	0.55607	TRUE
hsLibDrugV1Nik_08412	MAP2K5	426.63/419.68/445.66	531.19/538.57/476.4	426.63	531.19	0.3156	205.21	2778.3	1.9838	0.97636	0.023639	0.047279	0.55607	TRUE
hsLibDrugV1Nik_24054	SCG5	625.44/555.95/556.12	721.04/676.17/488.54	556.12	676.17	0.28151	2402.4	3662	1.9837	0.97636	0.023644	0.047287	0.55607	TRUE
hsLibDrugV1Nik_16055	HIST1H3E	264.05/223.17/197.33	332.71/297.77/276.13	223.17	297.77	0.41445	1169.4	1414.7	1.9835	0.97634	0.023658	0.047316	0.55607	TRUE
hsLibDrugV1Nik_09185	LDHA	757.98/808.74/872.43	1015.4/954.59/791.98	808.74	954.59	0.23893	3316	5409.6	1.983	0.97632	0.023685	0.04737	0.55607	TRUE
hsLibDrugV1Nik_23817	CACNG6	79.733/116.52/101.97	74.789/151.57/179.03	101.97	151.57	0.56725	353.13	625.78	1.9828	0.97631	0.023694	0.047389	0.55607	TRUE
hsLibDrugV1Nik_26329	NonTargetingGuide023	684.46/572.74/575.01	697.07/763.24/630.14	575.01	697.07	0.27728	5992.9	3791.6	1.9823	0.97627	0.023725	0.047451	0.55607	TRUE
hsLibDrugV1Nik_05210	CYP4F11	504.29/622.11/908.31	656.8/749.27/816.25	622.11	749.27	0.26792	47895	4115.7	1.9821	0.97626	0.023736	0.047472	0.55607	TRUE
hsLibDrugV1Nik_27199	NonTargetingGuide893	781.8/903.54/897.92	1051.8/1094.3/976.06	897.92	1051.8	0.22801	6757.5	6032.5	1.9817	0.97624	0.023758	0.047516	0.55607	TRUE
hsLibDrugV1Nik_03849	SOAT2	733.13/650.75/625.99	636.66/792.27/780.85	650.75	780.85	0.26258	3700.1	4313.3	1.981	0.97621	0.023794	0.047589	0.55607	TRUE
hsLibDrugV1Nik_01749	GNRH1	162.57/204.41/128.41	223.41/225.75/283.21	162.57	225.75	0.47115	1458.6	1017.1	1.9809	0.9762	0.023802	0.047605	0.55607	TRUE
hsLibDrugV1Nik_25383	CCR6	420.41/326.85/316.3	429.55/368.72/417.74	326.85	417.74	0.35298	4432.2	2105.1	1.9808	0.97619	0.023807	0.047615	0.55607	TRUE
hsLibDrugV1Nik_13772	LRRC4C	399.7/471.03/418.27	521.6/580.49/416.72	418.27	521.6	0.31782	1563.8	2721.7	1.9806	0.97618	0.023817	0.047634	0.55607	TRUE
hsLibDrugV1Nik_07078	LAMA2	703.1/739.62/643.93	838.97/666.49/838.51	703.1	838.51	0.25375	2417.2	4675.5	1.9802	0.97616	0.02384	0.047679	0.55607	TRUE
hsLibDrugV1Nik_01692	CD53	261.98/287.36/195.45	236.83/342.92/369.19	261.98	342.92	0.38712	2535.4	1671.8	1.9796	0.97612	0.023875	0.047751	0.55607	TRUE
hsLibDrugV1Nik_16687	AXL	352.07/353.52/389.95	400.79/485.9/448.08	353.52	448.08	0.34112	664.69	2284.2	1.9786	0.97607	0.023932	0.047865	0.55607	TRUE
hsLibDrugV1Nik_22896	CYP2S1	550.89/296.24/428.66	518.73/533.19/581.59	428.66	533.19	0.31417	16237	2792.1	1.9783	0.97605	0.023947	0.047894	0.55607	TRUE
hsLibDrugV1Nik_04586	PSMG3	357.25/252.79/228.49	406.54/332.17/311.53	252.79	332.17	0.39261	5750.5	1610.8	1.9778	0.97602	0.023976	0.047952	0.55607	TRUE
hsLibDrugV1Nik_02360	TDP1	350/363.39/302.14	444.9/431.07/444.03	350	444.03	0.34245	1234.9	2260.6	1.9778	0.97602	0.023976	0.047952	0.55607	TRUE
hsLibDrugV1Nik_00110	P2RY14	260.95/163.92/142.57	227.24/237.57/218.48	163.92	227.24	0.46879	4934.8	1025.9	1.977	0.97598	0.024023	0.048046	0.55635	TRUE
hsLibDrugV1Nik_22743	CBLN1	741.42/584.59/516.47	606.94/707.34/719.15	584.59	707.34	0.27457	14618	3857.4	1.9765	0.97595	0.024049	0.048098	0.55635	TRUE
hsLibDrugV1Nik_00559	STAT3	685.5/794.92/704.36	895.55/839.57/714.09	704.36	839.57	0.253	4278.1	4684.2	1.9755	0.97589	0.024106	0.048212	0.55688	TRUE
hsLibDrugV1Nik_05752	THBD	144.97/131.33/175.62	209.02/179.52/204.32	144.97	204.32	0.49218	562.63	902.68	1.9753	0.97588	0.024119	0.048238	0.55688	TRUE
hsLibDrugV1Nik_22059	HTRA3	719.67/544.1/609	668.3/734.22/744.44	609	734.22	0.26936	8230.2	4025.4	1.9736	0.97579	0.024213	0.048425	0.55848	TRUE
hsLibDrugV1Nik_01992	ATP2C1	564.35/646.8/562.73	684.6/800.87/454.15	564.35	684.6	0.27824	3400.3	3718.4	1.9721	0.9757	0.024299	0.048597	0.55928	TRUE
hsLibDrugV1Nik_07888	NOD2	364.5/358.45/386.17	460.24/380.55/503.71	364.5	460.24	0.33566	253.18	2358.2	1.9716	0.97567	0.024329	0.048658	0.55953	TRUE
hsLibDrugV1Nik_00432	OSTN	217.45/172.81/169.95	240.67/181.67/237.69	172.81	237.69	0.45767	1000.7	1083.9	1.9709	0.97563	0.024368	0.048737	0.55953	TRUE
hsLibDrugV1Nik_15444	PLSCR4	315.83/489.79/309.69	404.63/543.94/392.45	315.83	404.63	0.35645	15150	2031.2	1.9703	0.9756	0.024402	0.048803	0.55953	TRUE
hsLibDrugV1Nik_14464	SPINK9	505.32/512.5/648.65	604.06/626.72/629.13	512.5	626.72	0.28975	9294.8	3363.2	1.9695	0.97555	0.024447	0.048894	0.55953	TRUE
hsLibDrugV1Nik_22384	ALDH7A1	814.94/759.37/772.34	913.76/695.52/952.8	772.34	913.76	0.24229	991.29	5156.1	1.9695	0.97555	0.02445	0.0489	0.55953	TRUE
hsLibDrugV1Nik_13104	PRSS54	242.31/206.38/279.48	446.81/271.97/319.62	242.31	319.62	0.3981	1336.2	1541.2	1.9694	0.97555	0.024453	0.048906	0.55953	TRUE
hsLibDrugV1Nik_27223	NonTargetingGuide917	440.09/431.53/552.35	545.57/548.24/466.29	440.09	545.57	0.30935	6337.9	2869.7	1.9691	0.97553	0.024468	0.048937	0.55953	TRUE
hsLibDrugV1Nik_02676	PSMA1	488.76/658.65/651.49	806.37/720.24/780.85	651.49	780.85	0.26095	13267	4318.4	1.9686	0.9755	0.024501	0.049002	0.55953	TRUE
hsLibDrugV1Nik_23781	KCNF1	237.13/174.78/256.82	313.54/340.77/308.5	237.13	313.54	0.40148	2137.3	1507	1.9683	0.97548	0.024518	0.049037	0.55953	TRUE
hsLibDrugV1Nik_02495	BICD1	459.76/451.28/542.91	567.63/626.72/465.27	459.76	567.63	0.30346	3492.5	3003.5	1.9682	0.97548	0.024523	0.049046	0.55953	TRUE
hsLibDrugV1Nik_01771	MASTL	295.12/273.53/253.99	432.43/355.82/337.83	273.53	355.82	0.37823	423.99	1748.6	1.9679	0.97546	0.024541	0.049081	0.55953	TRUE
hsLibDrugV1Nik_17745	BMP8B	11.39/7.8998/0.94418	29.724/0/21.241	7.8998	21.241	1.3214	30.283	43.673	2.0188	0.97539	0.024611	0.049221	0.56044	TRUE
hsLibDrugV1Nik_22820	ANGPTL7	245.41/224.16/287.98	323.12/352.6/237.69	245.41	323.12	0.39547	1131.7	1561.8	1.9664	0.97537	0.024627	0.049253	0.56044	TRUE
hsLibDrugV1Nik_25453	HRH2	294.08/269.58/322.91	425.72/379.47/357.05	294.08	379.47	0.36667	715.71	1885.7	1.9664	0.97537	0.024627	0.049254	0.56044	TRUE
hsLibDrugV1Nik_10031	CLCNKA	505.32/338.7/391.84	490.92/568.67/395.48	391.84	490.92	0.32449	7851.1	2542.7	1.9649	0.97529	0.02471	0.049421	0.56134	TRUE
hsLibDrugV1Nik_17629	CST8	207.1/169.85/153.9	233.95/275.2/126.43	169.85	233.95	0.45968	821.03	1064.5	1.9649	0.97529	0.024715	0.04943	0.56134	TRUE
hsLibDrugV1Nik_01429	FAM20A	304.44/328.83/406	377.78/419.25/429.87	328.83	419.25	0.34951	3275.1	2118.3	1.9645	0.97526	0.024737	0.049473	0.56134	TRUE
hsLibDrugV1Nik_11119	PIK3CD	312.72/321.92/439.99	411.34/420.32/317.6	321.92	411.34	0.35266	7012.9	2072	1.9645	0.97526	0.024738	0.049476	0.56134	TRUE
hsLibDrugV1Nik_17240	FCRL2	11.39/8.8873/2.8326	23.012/13.975/30.344	8.8873	23.012	1.2801	21.463	49.366	2.0103	0.97525	0.024747	0.049495	0.56134	TRUE
hsLibDrugV1Nik_06782	PTPRG	701.03/707.03/685.48	835.14/1000.8/514.84	701.03	835.14	0.25221	138.97	4661.1	1.9643	0.97525	0.024748	0.049497	0.56134	TRUE
hsLibDrugV1Nik_26634	NonTargetingGuide328	490.83/478.93/496.64	602.14/488.05/626.1	490.83	602.14	0.29435	87.717	3215.2	1.9632	0.97519	0.024812	0.049624	0.56194	TRUE
hsLibDrugV1Nik_25290	ABCA1	313.76/258.72/203.94	338.47/359.05/223.53	258.72	338.47	0.38632	3014.7	1650.1	1.9632	0.97519	0.024813	0.049626	0.56194	TRUE
hsLibDrugV1Nik_02702	GALK1	239.2/276.49/278.53	233/359.05/399.53	276.49	359.05	0.37573	697.47	1768.4	1.9631	0.97518	0.024816	0.049632	0.56194	TRUE
hsLibDrugV1Nik_05982	ADCYAP1R1	76.627/93.81/157.68	145.74/140.82/118.34	93.81	140.82	0.58098	2187.2	573.72	1.9628	0.97516	0.024837	0.049674	0.56194	TRUE
hsLibDrugV1Nik_18676	LAMP3	537.42/545.09/676.98	662.55/677.24/533.04	545.09	662.55	0.28108	8727.3	3586.3	1.9615	0.97509	0.024913	0.049825	0.56311	TRUE
hsLibDrugV1Nik_20603	COL21A1	346.89/346.6/419.22	513.93/439.67/371.21	346.89	439.67	0.34106	2615.6	2239.7	1.9605	0.97503	0.024972	0.049943	0.56347	TRUE
hsLibDrugV1Nik_06241	KCNJ11	740.38/665.56/527.8	795.83/837.42/713.08	665.56	795.83	0.25753	12288	4415.6	1.9604	0.97502	0.024975	0.04995	0.56347	TRUE
hsLibDrugV1Nik_03971	FAM3B	234.02/206.38/281.37	275.18/309.6/310.52	234.02	309.6	0.40224	1502.7	1486.4	1.9602	0.97502	0.024985	0.04997	0.56347	TRUE
hsLibDrugV1Nik_24989	C17orf99	0/9.8748/12.274	31.641/24.725/24.275	9.8748	24.725	1.2422	51.635	55.085	2.0008	0.975	0.024998	0.049995	0.56347	TRUE
hsLibDrugV1Nik_06169	GANAB	207.1/220.21/321.97	293.4/252.62/311.53	220.21	293.4	0.41239	5263.4	1395.1	1.9596	0.97498	0.025021	0.050041	0.56375	TRUE
hsLibDrugV1Nik_07280	ADAMTS17	175/193.55/203	209.02/266.6/261.97	193.55	261.97	0.43479	216.67	1219.7	1.9593	0.97496	0.025041	0.050083	0.5638	TRUE
hsLibDrugV1Nik_20031	TLR2	478.4/412.76/509.86	386.41/588.02/605.87	478.4	588.02	0.29708	2648.8	3130.4	1.9592	0.97496	0.025043	0.050087	0.5638	TRUE
hsLibDrugV1Nik_21968	SCN8A	362.42/355.49/295.53	535.03/449.35/326.7	355.49	449.35	0.33717	1821.7	2297.5	1.958	0.97489	0.025112	0.050225	0.56432	TRUE
hsLibDrugV1Nik_04674	SLC12A3	439.05/431.53/366.34	702.82/535.34/443.02	431.53	535.34	0.31037	2152.7	2811.6	1.9579	0.97488	0.025119	0.050239	0.56432	TRUE
hsLibDrugV1Nik_13596	CCL3L3	30.029/6.9123/0	0.95883/19.35/25.287	6.9123	19.35	1.3628	291.09	38.008	2.0174	0.97488	0.02512	0.05024	0.56432	TRUE
hsLibDrugV1Nik_08471	ADCY5	203.99/106.65/105.75	133.28/188.12/156.78	106.65	156.78	0.55158	4738.5	655.69	1.9577	0.97487	0.025133	0.050265	0.56432	TRUE
hsLibDrugV1Nik_02122	LRP1	492.9/432.51/406	604.06/536.42/392.45	432.51	536.42	0.30997	2174.6	2818.3	1.9572	0.97484	0.025159	0.050319	0.56432	TRUE
hsLibDrugV1Nik_01843	MARK2	1146.3/1176.1/1271.8	1351/986.84/1369.5	1176.1	1351	0.19987	5026	7991.3	1.9566	0.9748	0.0252	0.0504	0.56454	TRUE
hsLibDrugV1Nik_15155	CFTR	343.79/263.66/355.01	368.19/462.25/435.94	343.79	435.94	0.34174	3273.4	2218.8	1.9564	0.97479	0.025206	0.050412	0.56454	TRUE
hsLibDrugV1Nik_19256	FREM3	401.77/373.27/356.9	419.97/492.34/469.32	373.27	469.32	0.32958	540.23	2417.3	1.9537	0.97463	0.02537	0.050741	0.56607	TRUE
hsLibDrugV1Nik_14217	FLNA	372.78/276.49/253.04	358.6/353.67/386.38	276.49	358.6	0.37395	4910.5	1768.4	1.9525	0.97456	0.025437	0.050874	0.56607	TRUE
hsLibDrugV1Nik_04241	KIT	698.96/752.46/671.32	750.76/832.04/839.52	698.96	832.04	0.25111	1813	4646.8	1.9523	0.97455	0.025454	0.050907	0.56607	TRUE
hsLibDrugV1Nik_20426	PDGFD	1008.6/941.06/815.78	855.27/1114.8/1096.4	941.06	1096.4	0.22023	10128	6334.8	1.952	0.97453	0.025467	0.050935	0.56607	TRUE
hsLibDrugV1Nik_00793	NEGR1	184.32/323.89/207.72	219.57/278.42/427.85	207.72	278.42	0.42087	7021.7	1312.8	1.9513	0.97449	0.025511	0.051021	0.56633	TRUE
hsLibDrugV1Nik_14959	GPA33	420.41/396.97/525.91	585.84/522.44/476.4	420.41	522.44	0.3128	5839.9	2736.2	1.9506	0.97445	0.025553	0.051106	0.56639	TRUE
hsLibDrugV1Nik_16684	AXL	161.54/222.18/107.64	176.42/231.12/223.53	161.54	223.53	0.46616	3291.5	1010.4	1.9504	0.97444	0.025563	0.051127	0.56639	TRUE
hsLibDrugV1Nik_24049	ABCG2	114.94/122.45/85.921	166.84/265.52/152.73	114.94	166.84	0.53367	449.24	708.86	1.9492	0.97436	0.025638	0.051275	0.56731	TRUE
hsLibDrugV1Nik_03961	NPNT	362.42/297.23/270.98	425.72/305.3/382.33	297.23	382.33	0.36218	2469.7	1906.7	1.949	0.97435	0.02565	0.051299	0.56731	TRUE
hsLibDrugV1Nik_20824	CCL25	484.61/606.31/516.47	629.95/569.74/645.32	516.47	629.95	0.28605	4543.1	3390.4	1.9489	0.97435	0.025651	0.051302	0.56731	TRUE
hsLibDrugV1Nik_07706	HDAC9	764.2/762.33/697.75	901.3/1012.6/737.36	762.33	901.3	0.2413	2087	5086.5	1.9485	0.97432	0.025677	0.051355	0.56731	TRUE
hsLibDrugV1Nik_23041	TLL2	861.53/922.3/845.05	1009.6/1020.2/744.44	861.53	1009.6	0.22862	1982.3	5778	1.9485	0.97432	0.025678	0.051356	0.56731	TRUE
hsLibDrugV1Nik_20716	REG4	366.57/314.02/295.53	286.69/424.62/401.55	314.02	401.55	0.35374	1551.6	2019	1.9481	0.9743	0.025702	0.051404	0.56738	TRUE
hsLibDrugV1Nik_02004	GRIN2D	281.66/382.15/236.99	364.35/352.6/365.14	281.66	364.35	0.37025	6047.4	1802.8	1.9477	0.97428	0.025723	0.051447	0.56743	TRUE
hsLibDrugV1Nik_24621	C4BPA	686.54/834.42/627.88	1182.2/818.07/732.3	686.54	818.07	0.25255	12655	4560.7	1.9477	0.97427	0.025728	0.051456	0.56743	TRUE
hsLibDrugV1Nik_24558	USH2A	374.85/271.56/327.63	445.85/417.1/366.15	327.63	417.1	0.34736	2687.1	2110.3	1.9475	0.97426	0.025738	0.051476	0.56743	TRUE
hsLibDrugV1Nik_10979	KCNJ5	624.41/500.65/537.24	652.96/651.44/720.16	537.24	652.96	0.28095	4468.3	3532.5	1.947	0.97423	0.025767	0.051534	0.56743	TRUE
hsLibDrugV1Nik_05398	CYP1A1	457.69/482.88/498.53	622.28/592.32/456.17	482.88	592.32	0.29417	439.67	3160.9	1.9466	0.97421	0.02579	0.05158	0.56749	TRUE
hsLibDrugV1Nik_11808	FCGR3A	435.94/451.28/578.79	506.26/556.84/647.34	451.28	556.84	0.30266	8246.8	2945.8	1.9451	0.97412	0.025884	0.051767	0.56909	TRUE
hsLibDrugV1Nik_07756	PDE4A	389.35/365.37/511.75	487.08/505.24/413.69	389.35	487.08	0.32237	7778.5	2525.9	1.9447	0.97409	0.025906	0.051812	0.56911	TRUE
hsLibDrugV1Nik_17002	COL11A1	401.77/373.27/369.18	468.87/411.72/506.74	373.27	468.87	0.32819	414.7	2417.3	1.9444	0.97408	0.025921	0.051842	0.56922	TRUE
hsLibDrugV1Nik_18575	NTN1	150.15/153.06/145.4	210.94/209.62/133.51	150.15	209.62	0.47871	15.486	936.28	1.9437	0.97404	0.025964	0.051928	0.56947	TRUE
hsLibDrugV1Nik_23343	PPP1CA	143.93/158/138.8	225.32/202.1/126.43	143.93	202.1	0.48678	112.07	895.97	1.9431	0.974	0.025999	0.051999	0.56956	TRUE
hsLibDrugV1Nik_09198	NPS	863.61/942.05/798.78	1101.7/910.52/1011.5	863.61	1011.5	0.22776	5178.1	5792.5	1.9428	0.97398	0.026022	0.052045	0.56984	TRUE
hsLibDrugV1Nik_08540	SOD2	1070.7/1417/1073.5	1375/1084.7/1239	1073.5	1239	0.20668	58997	7266.6	1.9416	0.97391	0.026095	0.05219	0.57119	TRUE
hsLibDrugV1Nik_06081	H3F3B	322.04/330.8/320.08	410.38/388.07/477.41	322.04	410.38	0.34875	40.331	2072.8	1.9403	0.97383	0.026171	0.052342	0.57251	TRUE
hsLibDrugV1Nik_02024	MYLK	666.86/538.17/575.95	708.57/695.52/543.16	575.95	695.52	0.27171	4845.8	3798.1	1.9401	0.97382	0.026184	0.052369	0.57251	TRUE
hsLibDrugV1Nik_10952	IGLV5-37	229.88/194.53/281.37	303.95/339.7/293.33	229.88	303.95	0.40142	1950.2	1459	1.9391	0.97376	0.026245	0.052489	0.57332	TRUE
hsLibDrugV1Nik_11775	AGA	835.65/627.05/659.04	787.2/755.72/886.04	659.04	787.2	0.256	16107	4370.6	1.9385	0.97372	0.02628	0.052559	0.57336	TRUE
hsLibDrugV1Nik_24557	USH2A	339.64/380.18/437.16	547.49/421.4/476.4	380.18	476.4	0.32473	2444.9	2464	1.9385	0.97372	0.026283	0.052566	0.57336	TRUE
hsLibDrugV1Nik_13773	LRRC4C	534.32/606.31/583.51	703.78/775.07/615.98	583.51	703.78	0.26995	1469.8	3850	1.9384	0.97371	0.026288	0.052577	0.57336	TRUE
hsLibDrugV1Nik_10722	PKD2L1	470.12/499.66/424.88	533.11/685.84/577.55	470.12	577.55	0.29635	1459.5	3074	1.9377	0.97367	0.026332	0.052664	0.57401	TRUE
hsLibDrugV1Nik_16165	VIT	162.57/226.13/157.68	224.37/263.37/185.1	162.57	224.37	0.46233	2031.8	1017.1	1.9375	0.97366	0.026339	0.052679	0.57401	TRUE
hsLibDrugV1Nik_07574	SOAT1	270.27/285.38/319.13	368.19/312.82/438.98	285.38	368.19	0.36643	683.9	1827.6	1.937	0.97363	0.026371	0.052741	0.57445	TRUE
hsLibDrugV1Nik_04918	MRGPRF	444.23/444.36/343.68	548.45/561.14/513.82	444.23	548.45	0.30344	5054.7	2897.8	1.9361	0.97357	0.026431	0.052861	0.57477	TRUE
hsLibDrugV1Nik_25231	PPIB	246.45/246.87/228.49	323.12/328.95/220.5	246.45	323.12	0.38942	161.3	1568.7	1.9359	0.97356	0.026437	0.052875	0.57477	TRUE
hsLibDrugV1Nik_04104	LIFR	274.41/336.73/276.65	439.14/291.32/358.06	276.65	358.06	0.37097	1807.5	1769.4	1.9354	0.97353	0.026468	0.052936	0.5752	TRUE
hsLibDrugV1Nik_19374	CARM1	252.66/222.18/225.66	330.8/298.85/263.99	225.66	298.85	0.4037	370.59	1431.1	1.9346	0.97348	0.026519	0.053038	0.57568	TRUE
hsLibDrugV1Nik_16436	CACNA1G	705.17/677.41/618.44	827.47/719.17/807.15	677.41	807.15	0.25247	2124.1	4497.6	1.9346	0.97348	0.02652	0.053041	0.57568	TRUE
hsLibDrugV1Nik_22513	FAAH2	497.04/489.79/562.73	620.36/607.37/524.95	497.04	607.37	0.28869	2184.2	3257.6	1.9331	0.97339	0.026615	0.053229	0.57647	TRUE
hsLibDrugV1Nik_05226	BMPR1B	525/466.09/473.98	496.67/596.62/581.59	473.98	581.59	0.29462	1332.5	3100.3	1.9327	0.97336	0.026638	0.053276	0.57647	TRUE
hsLibDrugV1Nik_24664	OR4K5	2239.8/1967.1/1803.4	1992.4/2420.9/2192.9	1967.1	2192.9	0.1567	50583	13659	1.9321	0.97333	0.026672	0.053345	0.57647	TRUE
hsLibDrugV1Nik_04785	LTB4R	572.63/533.24/738.35	691.31/722.39/581.59	572.63	691.31	0.27131	14508	3775.3	1.9316	0.9733	0.026704	0.053408	0.57647	TRUE
hsLibDrugV1Nik_13636	MFAP5	676.18/460.16/471.15	583.93/578.34/397.51	471.15	578.34	0.29518	21079	3081	1.9312	0.97327	0.026728	0.053456	0.57648	TRUE
hsLibDrugV1Nik_20432	PLAC1	722.78/597.42/824.27	825.55/899.77/856.71	722.78	856.71	0.24495	13008	4811.9	1.9308	0.97325	0.026755	0.05351	0.57658	TRUE
hsLibDrugV1Nik_03953	ABCA4	1050/879.84/913.97	1042.2/1065.3/1143	913.97	1065.3	0.22084	9833.8	6144.9	1.9307	0.97324	0.026762	0.053524	0.57658	TRUE
hsLibDrugV1Nik_02348	BCAN	345.86/274.52/286.09	376.82/368.72/309.51	286.09	368.72	0.36495	1853.1	1832.3	1.9304	0.97322	0.026777	0.053554	0.57658	TRUE
hsLibDrugV1Nik_10272	WNT11	221.6/193.55/189.78	280.94/226.82/260.96	193.55	260.96	0.42923	400.52	1219.7	1.9303	0.97321	0.026785	0.05357	0.57658	TRUE
hsLibDrugV1Nik_07898	CASP2	520.86/417.7/456.04	590.64/502.02/561.36	456.04	561.36	0.29918	2835.4	2978.2	1.93	0.97319	0.026806	0.053613	0.57658	TRUE
hsLibDrugV1Nik_12306	ERBB2	261.98/302.17/245.49	226.28/394.52/340.86	261.98	340.86	0.37846	943.49	1671.8	1.9293	0.97315	0.026849	0.053699	0.57728	TRUE
hsLibDrugV1Nik_01578	ABCC12	445.26/646.8/442.82	569.54/515.99/549.23	445.26	549.23	0.30213	20311	2904.9	1.9289	0.97313	0.026872	0.053744	0.57739	TRUE
hsLibDrugV1Nik_03510	LILRB1	422.48/309.08/290.81	395.04/274.12/403.57	309.08	395.04	0.353	6597.1	1986	1.9288	0.97312	0.026876	0.053751	0.57739	TRUE
hsLibDrugV1Nik_06859	CST9L	666.86/690.25/667.54	795.83/710.57/828.39	667.54	795.83	0.25326	258.03	4429.3	1.9276	0.97305	0.026952	0.053904	0.57868	TRUE
hsLibDrugV1Nik_02473	ANGPTL3	374.85/245.88/297.42	381.61/270.9/382.33	297.42	381.61	0.35855	4325.9	1908	1.9275	0.97304	0.026957	0.053914	0.57868	TRUE
hsLibDrugV1Nik_00502	CPB2	411.09/317.97/364.46	443.94/457.95/480.45	364.46	457.95	0.32863	2168.1	2357.9	1.9253	0.97291	0.027095	0.05419	0.57994	TRUE
hsLibDrugV1Nik_26742	NonTargetingGuide436	302.37/421.65/363.51	482.29/456.87/338.84	363.51	456.87	0.32898	3559.6	2351.5	1.9252	0.9729	0.027101	0.054202	0.57994	TRUE
hsLibDrugV1Nik_09022	TEK	299.26/394.99/315.36	416.13/402.05/388.4	315.36	402.05	0.34939	3300.3	2028	1.925	0.97288	0.027116	0.054232	0.57996	TRUE
hsLibDrugV1Nik_12551	FOLH1	701.03/745.54/616.55	691.31/913.74/832.44	701.03	832.44	0.24753	4559.1	4661.1	1.9247	0.97287	0.027133	0.054266	0.57996	TRUE
hsLibDrugV1Nik_13416	RRM2B	10.355/14.812/0.94418	9.5883/29.025/25.287	10.355	25.287	1.211	54.215	57.875	1.9627	0.9728	0.027198	0.054395	0.57996	TRUE
hsLibDrugV1Nik_17551	PGA5	207.1/232.06/267.2	305.87/196.72/363.12	232.06	305.87	0.39693	929.1	1473.4	1.9229	0.97275	0.027248	0.054496	0.58025	TRUE
hsLibDrugV1Nik_27225	NonTargetingGuide919	427.66/537.19/596.72	596.39/651.44/731.29	537.19	651.44	0.27775	7770.4	3532.2	1.9225	0.97273	0.027273	0.054546	0.58043	TRUE
hsLibDrugV1Nik_08167	CYP4F3	219.53/166.88/194.5	261.76/207.47/270.06	194.5	261.76	0.42656	694.48	1225.9	1.9209	0.97263	0.027371	0.054742	0.58171	TRUE
hsLibDrugV1Nik_06503	CTHRC1	503.25/521.39/617.5	633.79/552.54/708.03	521.39	633.79	0.28115	4783	3424	1.9208	0.97262	0.027376	0.054751	0.58171	TRUE
hsLibDrugV1Nik_08514	UGCG	141.86/153.06/156.73	232.04/105.35/212.41	153.06	212.41	0.47013	69.425	955.19	1.9203	0.97259	0.02741	0.05482	0.58199	TRUE
hsLibDrugV1Nik_18086	IVNS1ABP	680.32/544.1/457.93	699.94/658.97/615.98	544.1	658.97	0.27588	12991	3579.5	1.92	0.97257	0.027432	0.054864	0.58222	TRUE
hsLibDrugV1Nik_07907	REG1A	1025.1/1247.2/1054.7	1216.8/1191.1/1293.7	1054.7	1216.8	0.20608	18969	7133.5	1.9192	0.97252	0.027477	0.054955	0.5827	TRUE
hsLibDrugV1Nik_10276	WNT11	358.28/387.09/436.21	483.25/500.94/479.43	387.09	483.25	0.31936	1621.5	2510.7	1.9191	0.97251	0.027486	0.054973	0.5827	TRUE
hsLibDrugV1Nik_24277	ADAM8	330.32/351.54/409.78	442.98/402.05/444.03	351.54	442.98	0.3327	1920.7	2270.9	1.9188	0.97249	0.027508	0.055016	0.58293	TRUE
hsLibDrugV1Nik_01893	IGLV2-11	799.4/621.12/561.79	744.05/798.72/722.19	621.12	744.05	0.26014	17652	4108.9	1.9177	0.97243	0.027573	0.055146	0.5834	TRUE
hsLibDrugV1Nik_10107	IL12B	463.9/419.68/492.86	612.69/405.27/569.46	463.9	569.46	0.29518	1397.3	3031.7	1.917	0.97238	0.027618	0.055236	0.58347	TRUE
hsLibDrugV1Nik_17543	FSTL1	168.79/160.96/280.42	386.41/231.12/178.02	168.79	231.12	0.45117	6262	1057.6	1.9168	0.97237	0.027632	0.055263	0.58347	TRUE
hsLibDrugV1Nik_24608	ALDH1L1	648.22/506.58/526.85	651.04/639.62/573.5	526.85	639.62	0.27932	7570.6	3461.4	1.9166	0.97236	0.027642	0.055283	0.58347	TRUE
hsLibDrugV1Nik_25194	CALR	168.79/163.92/215.27	231.08/221.45/279.16	168.79	231.08	0.45089	1092.4	1057.6	1.9154	0.97228	0.02772	0.05544	0.58347	TRUE
hsLibDrugV1Nik_20065	PLAU	362.42/360.43/376.73	341.34/529.97/455.16	362.42	455.16	0.32788	104.31	2344.2	1.9153	0.97228	0.027725	0.05545	0.58347	TRUE
hsLibDrugV1Nik_27134	NonTargetingGuide828	482.54/429.55/479.65	652/586.94/521.92	479.65	586.94	0.2907	1258.9	3138.9	1.9151	0.97226	0.027737	0.055473	0.58347	TRUE
hsLibDrugV1Nik_07230	ITGAX	122.19/115.53/95.363	168.75/166.62/134.52	115.53	166.62	0.52446	225.59	712.68	1.9137	0.97217	0.027829	0.055657	0.58433	TRUE
hsLibDrugV1Nik_18392	CAMP	652.36/503.61/522.13	786.24/624.57/634.19	522.13	634.19	0.28001	8651.4	3429.1	1.9136	0.97216	0.027839	0.055677	0.58433	TRUE
hsLibDrugV1Nik_18319	BCL2	326.18/321.92/338.96	446.81/413.87/385.37	326.18	413.87	0.34257	90.763	2100.6	1.9133	0.97214	0.027857	0.055713	0.58433	TRUE
hsLibDrugV1Nik_12678	C5AR1	470.12/343.64/434.32	304.91/566.52/536.08	434.32	536.08	0.30304	4752.2	2830.6	1.9125	0.9721	0.027905	0.05581	0.58436	TRUE
[truncated: 25,623 more rows]
